# Supplementary material
Source: publisher figshare collection journal article supplement (https://diabetesjournals.figshare.com/ndownloader/files/28682094)
Supplement: Supplementary file 1 [file 28682094]

## Sheet: Astrocytes
gene	combined_expr_specificity	cellex_score_zhang	expr_proportion_zhang	cellex_score_ludwig	expr_proportion_ludwig
Itih3	0.587856	0.203125	18.0776	0.972586	42.5175
Slc4a4	0.582494	0.236328	88.3598	0.92866	85.4489
Dao	0.576647	0.25	10.3175	0.903294	10.2526
Ntsr2	0.574018	0.1875	19.5767	0.960536	32.8062
Atp13a4	0.569599	0.171875	9.52381	0.967322	24.8567
Atp1b2	0.56772	0.224609	84.7443	0.910831	37.2745
Slc6a11	0.566644	0.167969	59.9647	0.96532	60.9106
Slc1a2	0.55833	0.150391	49.9118	0.96627	73.6256
Ndrg2	0.546594	0.199219	75.1323	0.89397	56.0603
Ttyh1	0.54568	0.230469	86.8607	0.860891	33.6234
Cldn10	0.544536	0.15625	14.6384	0.932823	19.4545
Plpp3	0.543925	0.205078	78.6596	0.882771	51.3797
A2m	0.543729	0.222656	46.1199	0.864802	9.59457
Agt	0.543491	0.15625	40.5644	0.930732	28.1681
Gja1	0.540702	0.164062	53.8801	0.917341	36.3829
Aqp4	0.540611	0.166016	60.9347	0.915206	24.9098
Gpr37l1	0.533139	0.226562	86.5079	0.839715	28.9217
Sparcl1	0.527299	0.25	99.3827	0.804599	71.0253
Slc6a1	0.512985	0.216797	81.9224	0.809172	38.4101
Fgfr3	0.508568	0.0683594	43.9153	0.948776	26.7141
Slc39a12	0.499784	0.152344	63.4039	0.847224	38.2084
Atp1a2	0.499336	0.136719	50.1764	0.861954	71.3861
Acsl3	0.498338	0.105469	51.8519	0.891207	30.6623
Gjb6	0.49535	0.078125	28.3951	0.912576	16.7268
Acsl6	0.494099	0.134766	52.7337	0.853432	18.3188
Gm12239	0.493571	0	0	0.987142	55.3386
Cxcl14	0.491621	0.109375	17.4603	0.873866	8.37402
Pla2g7	0.490023	0.242188	94.8854	0.737858	41.2757
Rorb	0.489107	0	3.08642	0.978213	48.0896
Acsbg1	0.486285	0	18.0776	0.97257	30.726
Slc7a10	0.486229	0	2.82187	0.972458	39.3653
Trim9	0.481043	0	11.9929	0.962087	46.3914
Gria1	0.480433	0.214844	82.3633	0.746022	64.0416
Gm3764	0.479898	0	0	0.959796	85.0456
Npas2	0.478364	0	4.2328	0.956729	24.7506
Phkg1	0.47824	0	6.52557	0.956481	52.0166
Aldoc	0.477367	0.222656	85.5379	0.732078	39.8535
Nmur2	0.47575	0	0	0.9515	13.6171
Gabrb1	0.474989	0.0976562	51.94	0.852321	89.9172
Adrbk2	0.474861	0	0	0.949721	31.3734
Bcan	0.47465	0.101562	54.4974	0.847737	32.6682
B230323A14Rik	0.472464	0	2.99824	0.944928	19.4651
F3	0.472269	0.0234375	39.1534	0.9211	35.0244
Nhsl1	0.47216	0	8.11287	0.944319	43.0482
Lgi1	0.471888	0	15.6085	0.943776	42.4008
Trp63	0.469446	0	0.352734	0.938891	12.4284
Mapk4	0.469271	0	12.7866	0.938543	32.9442
Lrig1	0.468851	0	19.1358	0.937703	20.675
Bmpr1b	0.46827	0	28.0423	0.936539	35.5232
Fut9	0.467942	0.0390625	10.8466	0.896821	39.8535
Kcnj10	0.467829	0.191406	70.194	0.744253	22.9463
Lgr6	0.46721	0	5.20282	0.93442	10.1677
Ntrk2	0.466498	0.197266	74.515	0.735731	46.6568
Dbx2	0.466377	0	3.1746	0.932754	16.2917
Paqr6	0.464732	0	4.05644	0.929464	16.9072
Ptch1	0.463303	0	28.6596	0.926606	48.737
Ednrb	0.463127	0.0898438	52.4691	0.836411	15.018
Acot11	0.462816	0	16.3139	0.925631	20.8979
Arhgef26	0.46133	0	18.1658	0.922659	30.1528
Rgs6	0.460729	0	4.2328	0.921459	54.8716
Camk2g	0.460051	0	27.425	0.920103	44.7676
Etnppl	0.459688	0.0253906	43.739	0.893985	18.0429
Mmd2	0.458163	0.0429688	43.4744	0.873358	24.9947
Nim1k	0.457853	0	4.67372	0.915705	21.2057
Sorcs2	0.456898	0	3.52734	0.913796	14.0204
Cdh22	0.455933	0	1.5873	0.911866	11.5474
Ndst3	0.455513	0	4.05644	0.911025	25.069
Car10	0.454357	0.015625	36.4198	0.893089	65.4744
Mical2	0.453726	0	8.81834	0.907451	20.5583
Cd38	0.453029	0	9.43563	0.906058	9.26555
Lhfp	0.452734	0	9.25926	0.905468	34.7378
Egfr	0.452691	0	2.99824	0.905381	13.2456
Gpc5	0.452489	0	1.23457	0.904979	83.2095
Hif3a	0.452226	0	1.41093	0.904452	7.94948
Adcy8	0.451152	0	11.8166	0.902304	28.1575
Gli2	0.450483	0	4.7619	0.900967	11.8552
Grin2c	0.449329	0	0.0881834	0.898658	6.37869
Psd2	0.449031	0	20.4586	0.898062	15.4532
Gpld1	0.44855	0	1.67549	0.897099	23.8378
Gabrg1	0.447768	0	8.81834	0.895535	13.5003
Gm11713	0.447638	0	0	0.895276	11.643
Wdr17	0.447525	0	19.7531	0.895049	35.7567
Cables1	0.447374	0	9.52381	0.894748	19.1573
Paqr8	0.447111	0	29.3651	0.894221	33.252
Sdc4	0.447036	0	26.1905	0.894073	16.5039
Mlc1	0.446218	0.212891	81.9224	0.679545	13.893
Eva1a	0.445698	0	7.05467	0.891396	9.3823
A330087D11Rik	0.444884	0	0	0.889768	4.94587
Aldh1l1	0.444295	0	12.7866	0.88859	9.96604
Nwd1	0.444033	0	11.9048	0.888066	17.9367
Lgi4	0.444028	0	0	0.888056	6.48482
Kcnn2	0.443888	0	52.0282	0.887775	27.8179
Ddhd1	0.443258	0	13.1393	0.886516	32.3817
Atl2	0.441528	0	14.1093	0.883056	18.2551
9430041J12Rik	0.440788	0	5.11464	0.881576	16.7162
Gpam	0.439785	0	2.29277	0.87957	9.79622
Gpm6a	0.439647	0.201172	74.4268	0.678123	38.0811
Csgalnact1	0.439101	0	10.4938	0.878202	35.7355
Gabra4	0.438875	0	8.28924	0.877751	10.38
Lfng	0.437726	0	16.1376	0.875452	12.6937
Acvr1c	0.436978	0	0.881834	0.873956	5.27489
Gabra2	0.436466	0	16.6667	0.872932	29.4948
Vcl	0.435709	0	7.05467	0.871417	26.5867
Trpm3	0.43475	0	33.5979	0.8695	93.9291
Hacd2	0.433564	0	20.3704	0.867128	24.3154
Gm26704	0.433554	0	0	0.867108	7.99193
Fzd1	0.433467	0.0585938	46.2081	0.80834	5.79495
Ucp3	0.431496	0	0.176367	0.862992	3.92698
Htra1	0.431416	0	16.9312	0.862832	19.9639
D030047H15Rik	0.431247	0	0	0.862494	14.6678
Pygm	0.430558	0	3.61552	0.861116	6.58034
Luzp2	0.430302	0.111328	43.0335	0.749276	68.7858
Mgat4c	0.427992	0	28.4832	0.855984	77.924
Tnik	0.427587	0	16.4903	0.855174	58.9471
Glud1	0.427191	0	41.6226	0.854382	33.6977
Pitpnc1	0.426618	0	20.2822	0.853236	74.5171
Prex2	0.426456	0	37.2134	0.852912	44.8631
Cyp2j9	0.426064	0	11.9048	0.852127	9.5415
Tiam2	0.425493	0	4.7619	0.850986	19.4757
Sh3pxd2b	0.425234	0	6.26102	0.850469	14.9756
Kcnip3	0.42518	0.140625	8.20106	0.709735	30.1422
Hes5	0.424641	0	2.29277	0.849282	7.77966
Ttyh3	0.42347	0.0820312	45.1499	0.764908	10.1359
Abr	0.423002	0	31.0406	0.846004	42.7404
Tlcd1	0.422709	0	11.0229	0.845419	9.08512
Phyhipl	0.422138	0	19.5767	0.844276	33.91
Btbd17	0.421192	0	8.28924	0.842385	5.82679
Tril	0.419025	0	25.9259	0.838051	10.8151
Gm21798	0.418291	0	0	0.836582	5.40225
Phka1	0.418221	0	24.9559	0.836443	38.6224
Celrr	0.417924	0	3.88007	0.835849	9.26555
Cep85l	0.417549	0	13.3157	0.835099	26.523
Tmc7	0.416891	0	5.90829	0.833783	19.9321
Farp1	0.415626	0	26.3668	0.831253	52.7277
Shroom3	0.414551	0.0449219	45.5908	0.784179	57.4294
Id2	0.414518	0	29.9824	0.829036	16.5464
Tom1l1	0.414127	0	12.2575	0.828253	13.3199
S1pr1	0.413777	0.146484	61.9048	0.681069	11.1017
Slc1a3	0.413509	0.244141	94.5326	0.582878	53.0673
Actr3b	0.413393	0	2.20459	0.826787	6.99427
Folh1	0.413309	0	11.1993	0.826618	19.6349
Sall2	0.412869	0	8.55379	0.825739	11.6536
Nrxn1	0.412758	0.0878906	39.8589	0.737625	97.2617
Adamts9	0.412312	0	1.49912	0.824624	9.47782
Apoe	0.412247	0.238281	90.8289	0.586213	90.9998
Prodh	0.411885	0	9.70018	0.823769	12.8635
Ahcyl1	0.410943	0	42.5926	0.821887	24.1668
Gabbr2	0.410884	0	20.7231	0.821769	18.2445
Pax6	0.410602	0	9.17108	0.821204	7.71598
Gm26703	0.409995	0	0	0.819989	4.09679
Acss1	0.409864	0	2.91005	0.819728	19.8578
Ccdc190	0.409586	0	5.29101	0.819172	12.4177
Dtna	0.408958	0.0527344	48.5009	0.765181	61.8234
Prdm16	0.408934	0	2.1164	0.817868	8.14052
Cpe	0.408526	0.0507812	38.0952	0.766271	42.8996
Vav3	0.407808	0	1.41093	0.815616	13.8718
4930448N21Rik	0.406598	0	0	0.813196	20.3991
Sema4a	0.406513	0	4.85009	0.813025	7.13224
Scg3	0.405678	0.173828	61.552	0.637527	17.3212
Chst10	0.405601	0	14.9912	0.811203	7.69476
Ppp1r3c	0.405319	0	6.17284	0.810638	5.18998
Abcd2	0.404566	0	1.5873	0.809133	8.42709
Robo2	0.403954	0	7.49559	0.807909	40.1613
Ntm	0.403545	0	27.1605	0.80709	94.1838
Gm43477	0.403338	0	0	0.806676	7.07918
Wnt7a	0.403172	0	1.85185	0.806345	3.67226
Hrh1	0.402747	0	3.88007	0.805494	3.84207
Micalcl	0.402735	0	0	0.805471	3.19465
Nrcam	0.402659	0	35.4497	0.805319	51.1356
Prkd1	0.402332	0	10.4938	0.804663	29.6222
Nkain4	0.402179	0	16.3139	0.804359	10.1359
Them4	0.401485	0	13.933	0.802969	12.7468
Fjx1	0.401474	0	35.1852	0.802947	6.26194
Timp4	0.400622	0	12.4339	0.801244	8.17236
Palld	0.40005	0	9.34744	0.8001	13.1288
Pde9a	0.399384	0	1.49912	0.798767	7.86457
Id4	0.398783	0.228516	87.037	0.569051	8.90469
Gk	0.398762	0	6.96649	0.797523	12.1736
Slc6a9	0.398442	0	0	0.796885	15.6442
Extl1	0.39832	0	0.793651	0.79664	3.92698
Sfxn5	0.398141	0.00976562	39.1534	0.786517	49.4906
Wasf3	0.398011	0	8.37743	0.796022	17.9792
Adk	0.397769	0	12.4339	0.795539	40.2568
Cbs	0.397663	0	17.6367	0.795326	9.11696
Plce1	0.397518	0	25.3086	0.795037	43.409
Elovl2	0.397405	0	3.43915	0.794809	2.7595
Sec14l2	0.397064	0	3.7037	0.794129	5.54023
Hopx	0.3969	0.15625	65.5203	0.637551	6.32562
Plcd4	0.396322	0	4.05644	0.792645	12.6512
Rhoq	0.395378	0	12.963	0.790756	26.9476
Dpf3	0.394801	0	1.0582	0.789601	13.235
D030068K23Rik	0.394269	0	3.26279	0.788538	13.0333
Abca4	0.394013	0	2.46914	0.788026	5.81617
Gm10561	0.393625	0	1.0582	0.78725	5.27489
A830019P07Rik	0.392195	0	1.0582	0.784389	7.44003
Prdx6	0.391358	0	58.642	0.782716	21.8
Abhd3	0.391058	0	21.9577	0.782116	13.2244
Gm266	0.390911	0	2.82187	0.781822	3.00361
Fam198a	0.390235	0	0	0.78047	2.70643
Kank1	0.38994	0	18.7831	0.779879	33.3156
Mt1	0.387528	0.181641	71.6049	0.593416	30.9276
Plcb1	0.387273	0	9.87654	0.774546	71.6302
Slc25a18	0.387211	0	36.4198	0.774421	15.485
Itpkb	0.387114	0	18.5185	0.774228	33.2944
Lcat	0.386913	0	20.1058	0.773826	5.37041
Gpr153	0.386439	0	18.6067	0.772878	5.77372
Apba2	0.385036	0	22.134	0.770071	20.346
Mras	0.384724	0	10.4938	0.769448	10.9637
Rgs20	0.384646	0	15.1675	0.769292	23.7317
Kcnd2	0.384567	0	5.73192	0.769134	84.4937
Boc	0.384493	0	9.34744	0.768986	11.3352
Cml3	0.384058	0	0	0.768116	8.88346
Tmem47	0.383735	0.162109	64.2857	0.60536	18.2233
Foxb1	0.383564	0	0.793651	0.767128	2.2076
Hr	0.382525	0	1.76367	0.76505	4.1817
Gli1	0.382286	0	0.970018	0.764573	3.16281
Slc27a1	0.381282	0	22.3986	0.762563	21.3224
Mt2	0.38078	0	65.0794	0.76156	23.4557
Thrsp	0.379612	0	10.8466	0.759225	5.00955
Hsd11b1	0.379519	0	0.705467	0.759038	3.41753
Hs3st3a1	0.379308	0	1.49912	0.758617	2.84441
Itga7	0.378817	0	3.08642	0.757634	3.99066
Lrrc16a	0.378199	0	0	0.756398	32.1057
Rdh5	0.378111	0	10.4056	0.756223	8.56506
Baalc	0.377911	0	4.32099	0.755823	3.12036
Tbc1d10a	0.377184	0	5.73192	0.754367	10.1783
Fam184a	0.377132	0	11.3757	0.754265	18.7964
Aqp9	0.376688	0	0.970018	0.753376	2.05901
Ttpa	0.376535	0	1.41093	0.75307	2.96115
Gfap	0.37653	0.0175781	34.6561	0.735482	8.89408
Atp7b	0.375823	0	3.96825	0.751646	2.82318
Rab34	0.375126	0	9.43563	0.750252	13.5746
Dgkb	0.374701	0	10.582	0.749403	57.4825
Igdcc4	0.374279	0	9.70018	0.748559	8.24666
Gm13872	0.373767	0	0	0.747535	0.817236
Pdzph1	0.373639	0	0	0.747278	1.51772
Kcnk1	0.373257	0	35.8025	0.746514	9.87052
Fxyd1	0.373107	0	19.3122	0.746215	8.34218
Kcnj16	0.37307	0	4.40917	0.746141	5.04139
4930545L23Rik	0.372975	0	0.0881834	0.745949	4.71238
Eps8	0.372476	0	5.37919	0.744953	18.3294
Hdac8	0.372453	0	18.6067	0.744907	54.2454
Arrb1	0.372149	0	8.90653	0.744298	13.288
Sfrp5	0.37202	0	1.49912	0.744039	2.40925
Sema4b	0.371478	0	7.23104	0.742956	8.41647
Gm4035	0.371478	0	0	0.742955	0.297177
Vegfa	0.371427	0	14.6384	0.742854	7.00488
Gm4491	0.371152	0	0	0.742305	1.44343
Gm26512	0.370958	0	0	0.741916	1.47527
Adcy2	0.370421	0	15.873	0.740843	20.6113
Trps1	0.369956	0	24.3386	0.739912	68.7646
Amot	0.369922	0	10.2293	0.739845	8.6712
Bcar3	0.369713	0	16.7549	0.739426	11.0698
Mir124-2hg	0.369656	0	6.61376	0.739313	9.77499
Thrb	0.369247	0	6.87831	0.738495	33.3263
Fry	0.369081	0	25.1323	0.738162	65.2622
Csdc2	0.368801	0	10.2293	0.737602	9.08512
Gcnt4	0.36754	0	0.26455	0.73508	0.955211
Dok7	0.367316	0	1.49912	0.734633	3.57674
Pld2	0.367026	0	5.82011	0.734051	7.8858
Tmem82	0.367006	0	0.176367	0.734011	0.435152
Slitrk2	0.366667	0	1.94004	0.733333	4.79728
AI464131	0.365919	0	0	0.731839	2.96115
Ctnnd2	0.36568	0	33.6861	0.73136	80.9064
Exoc3l4	0.365587	0	0.529101	0.731174	1.95288
Spry2	0.365154	0	5.37919	0.730309	10.1146
Rfx4	0.365138	0	38.1834	0.730275	31.522
Lpo	0.364917	0	0.352734	0.729834	2.40925
Slc15a2	0.36479	0	25.2205	0.72958	10.1783
Rimklb	0.364562	0	14.4621	0.729124	14.9013
Pfkm	0.364365	0	13.7566	0.728729	10.6665
Fstl1	0.364048	0	19.4004	0.728096	16.8223
Slc25a34	0.363652	0	1.49912	0.727304	1.3373
Fgd6	0.363222	0	1.49912	0.726444	7.5674
RP23-207N5.5	0.362487	0	0	0.724974	0.488219
C130071C03Rik	0.361974	0	11.6402	0.723949	28.0195
Slc7a2	0.361721	0	2.02822	0.723442	8.24666
Olfr658	0.361539	0	0.352734	0.723077	0.626194
Gm11266	0.360755	0	3.35097	0.721509	13.9779
Atp2b2	0.360262	0	13.4039	0.720525	18.8283
Aifm3	0.360105	0	4.67372	0.72021	10.2738
Fat3	0.360099	0	19.4885	0.720198	52.2713
9630028H03Rik	0.360065	0	0	0.72013	5.97538
Slc1a4	0.359784	0	12.522	0.719567	8.52261
Sds	0.359056	0	0.352734	0.718111	0.742942
BC055402	0.358912	0	0.0881834	0.717823	0.509446
Mtss1l	0.357669	0	0	0.715337	17.0983
Cth	0.357577	0	1.0582	0.715155	2.14392
Gm9881	0.355833	0	0	0.711666	2.33496
Sdc2	0.355592	0	34.4797	0.711183	22.2352
Caln1	0.355579	0	1.32275	0.711158	10.4224
Soat1	0.354949	0	12.6102	0.709898	10.2738
Rapgef3	0.35492	0	5.46737	0.709841	17.8731
Grifin	0.354858	0	1.14638	0.709715	0.403311
Dio2	0.354588	0	0.352734	0.709176	1.40098
Pipox	0.354477	0	2.38095	0.708953	3.90575
Phf21b	0.354473	0	1.32275	0.708946	4.27722
Hoxb3os	0.354363	0	0	0.708726	8.01316
A330093E20Rik	0.354232	0	0	0.708464	3.18404
Cyp4f15	0.354119	0	4.49735	0.708238	2.47294
Gm29514	0.353896	0	0	0.707792	11.0168
Nkx6-2	0.353882	0	0.617284	0.707765	6.55912
Adgrb3	0.353705	0	25.1323	0.707409	91.4456
Usp53	0.353352	0	5.64374	0.706705	16.4827
Nebl	0.352914	0	23.4568	0.705829	53.1097
Gm11536	0.352886	0	0	0.705772	3.09913
Ngef	0.352585	0	4.05644	0.70517	7.53556
Wnt8b	0.352233	0	0.881834	0.704465	0.923371
Gramd3	0.352162	0	8.64198	0.704324	14.6466
Wnt7b	0.352108	0	1.85185	0.704216	2.58968
AI849053	0.351516	0	0	0.703033	1.40098
Gdf10	0.351504	0.09375	33.0688	0.609259	1.31607
Nrarp	0.350808	0	0.0881834	0.701616	2.53662
Pigs	0.35013	0	17.9894	0.70026	9.25494
Ptprz1	0.349933	0.154297	68.1658	0.545569	53.5661
Frem1	0.3497	0	1.5873	0.699401	5.37041
Pcx	0.349489	0	18.6949	0.698977	15.4638
Spon1	0.349361	0.00195312	40.7407	0.696768	29.8557
Sox9	0.349129	0.0761719	55.8201	0.622087	7.64169
Pgm2	0.348889	0	20.8995	0.697779	10.0509
Plekho2	0.348117	0	11.2875	0.696235	2.62152
Arhgef4	0.347162	0	32.5397	0.694325	29.2188
Sntb1	0.347144	0	1.23457	0.694288	7.40819
Gm13387	0.346995	0	0	0.693991	0.477606
Dmp1	0.34634	0	0.0881834	0.69268	0.721715
Tmprss7	0.346266	0	0.793651	0.692532	1.44343
Acsm5	0.345451	0	2.55732	0.690902	1.58141
Neu2	0.345221	0	0.26455	0.690441	0.955211
Pstpip1	0.344825	0	0.705467	0.68965	2.90809
Zpld1	0.344811	0	0.0881834	0.689622	0.424538
A330033J07Rik	0.344499	0	0.617284	0.688997	9.4672
Pm20d1	0.343442	0	1.0582	0.686885	1.44343
Pnpla7	0.343057	0	10.4056	0.686114	20.5477
Adcyap1r1	0.343041	0.125	61.3757	0.561082	10.6665
Slc7a11	0.342937	0.210938	81.3933	0.474936	33.634
Prr5	0.342706	0	2.55732	0.685412	3.38569
Gm44257	0.342699	0	0	0.685397	5.87986
Zhx3	0.342679	0	11.552	0.685357	25.4192
Fads2	0.342582	0	8.11287	0.685164	12.7361
Cox7b2	0.342516	0	1.76367	0.685033	1.22055
Capn11	0.341615	0	1.67549	0.683231	2.19699
Arhgef19	0.341371	0	7.84832	0.682742	7.3339
Gtf2ird1	0.34086	0	6.96649	0.68172	11.6111
Agl	0.340851	0	9.70018	0.681702	14.2539
Fam21	0.340582	0	0	0.681165	12.6406
Chl1	0.339892	0	24.515	0.679784	31.2672
Cyp4f14	0.339659	0	2.73369	0.679319	0.965825
Pcdh7	0.339336	0	8.99471	0.678672	64.7421
Jakmip1	0.339144	0	15.0794	0.678288	14.5829
Pax3	0.338668	0	15.3439	0.677335	9.00021
Adhfe1	0.338667	0	6.96649	0.677333	7.92825
Sypl2	0.338314	0	0.617284	0.676628	0.562513
Pygb	0.338282	0.138672	65.6085	0.537891	21.7045
Fam181a	0.338245	0	0.881834	0.676489	1.74061
Npas3	0.338098	0	45.5908	0.676195	91.9868
Srgap1	0.337928	0	15.2557	0.675856	33.5491
Adra1a	0.337755	0	2.99824	0.675511	7.76905
Ppp1r1b	0.337692	0	10.0529	0.675383	2.02717
Gm16751	0.337563	0	0	0.675125	0.360858
Ptch2	0.337528	0	1.41093	0.675056	2.09085
RP23-106P7.5	0.337494	0	0	0.674989	1.29484
6530411M01Rik	0.336851	0	0.26455	0.673702	0.742942
Hs3st3b1	0.335526	0	3.35097	0.671053	2.3668
Shc3	0.335415	0	0	0.670829	8.39525
Cntfr	0.334754	0.109375	58.5538	0.560132	13.0015
Arxes2	0.334288	0	19.4004	0.668576	11.6536
Mfn1	0.334262	0	15.873	0.668523	18.7328
3110082J24Rik	0.33413	0	1.23457	0.668259	0.912757
Olfr287	0.334097	0	3.26279	0.668193	1.263
Spire1	0.333346	0	15.6085	0.666691	18.478
5031439G07Rik	0.333071	0	23.0159	0.666143	29.5373
Pou3f2	0.332222	0	13.2275	0.664445	6.21949
Clu	0.332143	0.103516	56.4374	0.56077	34.7909
Lhcgr	0.331907	0	0.176367	0.663813	0.58374
Gli3	0.331645	0	19.5767	0.663291	18.9344
Gm37885	0.331548	0	0	0.663096	0.742942
Chil1	0.33113	0	5.73192	0.662261	3.48121
Cyp7b1	0.330509	0	9.17108	0.661018	12.6725
Cst3	0.330233	0.171875	64.5503	0.488591	74.3473
Itgb8	0.330193	0	32.8924	0.660387	16.1218
Hepacam	0.329416	0.0996094	55.9965	0.559222	31.9465
Gm9925	0.329402	0	0	0.658804	1.56018
Gm1604b	0.329277	0	1.14638	0.658555	1.43282
Kctd5	0.329077	0	8.64198	0.658155	5.60391
Igsf1	0.328836	0	0.529101	0.657672	1.04012
Cntn1	0.328782	0.0546875	42.2399	0.602877	52.6958
Dtx1	0.327993	0	13.1393	0.655986	6.59096
Gm11681	0.327396	0	0.705467	0.654792	0.721715
Ndp	0.327357	0	0.617284	0.654715	0.838463
2900052N01Rik	0.327247	0	0.176367	0.654493	0.626194
Gadl1	0.327109	0	1.49912	0.654218	0.721715
St6galnac5	0.326763	0	5.11464	0.653526	4.91403
Sat1	0.32658	0	12.0811	0.653161	14.5192
Sycp2l	0.326564	0	0.176367	0.653128	0.965825
Adgrb1	0.326536	0	13.1393	0.653072	12.1206
2310022B05Rik	0.326387	0	32.716	0.652774	6.97304
B3galt2	0.326249	0	0.881834	0.652498	5.76311
6430573F11Rik	0.325632	0	0	0.651263	6.16642
Smox	0.32539	0	13.1393	0.650781	13.4366
Als2cl	0.324667	0	8.28924	0.649334	5.39164
A730020M07Rik	0.324086	0	0.176367	0.648172	0.764169
Sox1	0.323958	0	15.9612	0.647917	1.74061
Car5b	0.323947	0	1.49912	0.647893	1.50711
Abat	0.323742	0.0117188	46.7372	0.635764	16.9497
Gm12224	0.323288	0	0	0.646576	0.668648
Caskin1	0.323253	0	4.67372	0.646506	8.39525
Ccdc141	0.323219	0	2.1164	0.646437	19.879
Rftn2	0.32302	0	8.81834	0.646039	9.11696
Ppara	0.322944	0	0.881834	0.645888	6.75016
Mboat2	0.322784	0	22.575	0.645568	20.4734
Prr16	0.322433	0	0.26455	0.644866	18.5842
Sparc	0.321813	0.119141	63.3157	0.524485	31.5114
Elmo2	0.321373	0	11.1993	0.642746	6.79261
Fam20a	0.321268	0	34.2152	0.642536	15.5275
Wwc1	0.321049	0	5.37919	0.642098	16.1112
Appl2	0.320494	0	16.843	0.640988	16.1112
Gm12405	0.320275	0	0	0.64055	0.466992
Pgm5	0.320012	0	6.87831	0.640023	7.28083
Dfna5	0.319993	0	0	0.639986	28.2318
Plxnb1	0.319962	0	24.6032	0.639924	10.8363
F630040K05Rik	0.319923	0	0.26455	0.639846	1.52834
Fam228b	0.319386	0	1.67549	0.638773	5.21121
Adora2b	0.318747	0	2.73369	0.637494	2.6003
Hsf3	0.318029	0	10.4938	0.636059	0.955211
Gatsl3	0.316744	0	0	0.633487	3.89514
Pdgfrl	0.316636	0	1.0582	0.633272	5.82679
Agpat5	0.316461	0	15.9612	0.632921	11.1441
Calr4	0.31608	0	3.43915	0.632159	2.08024
Lix1	0.315955	0	5.90829	0.63191	5.18998
Lsamp	0.315833	0.0839844	50.5291	0.547682	99.2995
Kcng4	0.315289	0	1.23457	0.630579	1.30546
Gpr179	0.315245	0	5.90829	0.630489	3.25833
Asrgl1	0.314458	0	22.9277	0.628916	15.8353
Nat8	0.3141	0	2.29277	0.6282	0.838463
Cyp26b1	0.313687	0	1.14638	0.627374	1.25239
Ddit4l	0.313389	0	1.67549	0.626779	4.5744
RP23-274K7.1	0.313114	0	0	0.626227	1.25239
Ppargc1a	0.31229	0	21.9577	0.624581	18.5205
Ppp1r3d	0.311764	0	1.23457	0.623527	0.817236
Tmem164	0.311352	0	6.61376	0.622704	24.5171
Gm43568	0.311031	0	0.0881834	0.622063	0.668648
Itsn1	0.31066	0	7.93651	0.62132	15.7716
Gm42556	0.310218	0	0	0.620436	4.06495
Vstm4	0.310046	0	8.46561	0.620091	5.25366
Fmn2	0.30974	0	28.7478	0.61948	42.0399
Esrrg	0.309523	0	1.49912	0.619045	24.9629
Gm15083	0.309465	0	0	0.61893	0.382084
Aass	0.308465	0	3.88007	0.616929	2.22883
Serpine2	0.307001	0	15.3439	0.614001	35.3534
Esrrb	0.306974	0	0.617284	0.613948	0.541286
Aldh1a1	0.306483	0	21.9577	0.612966	6.75016
Ahcyl2	0.305414	0	11.6402	0.610828	25.4723
BC030499	0.305359	0	0	0.610717	0.880917
Fam107a	0.304697	0	32.4515	0.609395	3.82084
Tlr3	0.304439	0	14.5503	0.608878	3.17342
Pou3f3	0.304337	0	5.82011	0.608675	5.47654
Ephb3	0.304257	0	0.617284	0.608514	0.955211
Gm27239	0.303584	0	0	0.607168	0.604967
Vcam1	0.303546	0	2.6455	0.607092	4.07557
Ak4	0.303262	0	3.79189	0.606524	2.63214
C530044C16Rik	0.301825	0	0.970018	0.60365	0.573127
Gm42754	0.301438	0	0	0.602877	0.573127
Rcn2	0.301377	0	50.4409	0.602754	18.7752
Adrb1	0.300784	0	0.440917	0.601568	0.764169
Igsf8	0.30015	0	26.6314	0.600301	18.5311
Sardhos	0.300081	0	0	0.600163	1.83613
Gm34086	0.299819	0	0	0.599637	2.18637
Gm20757	0.299748	0	0.176367	0.599496	0.976438
Kirrel2	0.299515	0	0.440917	0.599029	0.339631
Tst	0.299293	0	2.38095	0.598585	2.98238
St3gal4	0.299006	0	18.1658	0.598012	40.7451
Gm26721	0.298997	0	0	0.597994	1.8892
Adgra1	0.298991	0	5.29101	0.597982	5.92231
4930544I03Rik	0.298161	0	0	0.596322	2.01656
Sash1	0.297796	0	21.6049	0.595592	32.2012
Gm2a	0.297024	0	22.134	0.594048	6.76077
Chpt1	0.296988	0	40.1235	0.593976	26.4594
Mdga2	0.295946	0	7.93651	0.591891	87.041
Cd81	0.295894	0.21875	83.4215	0.373039	60.0934
Notch3	0.295775	0	6.96649	0.591551	5.68881
Dlgap1	0.295528	0	22.3986	0.591056	67.682
Gm1604a	0.295508	0	0	0.591016	1.96349
Ocrl	0.295379	0	7.84832	0.590758	16.228
Cacng8	0.295343	0	4.40917	0.590687	5.39164
Pou3f4	0.295205	0	1.0582	0.590409	1.12503
Aox1	0.295143	0	5.90829	0.590287	6.84568
Kbtbd12	0.294708	0	0.176367	0.589416	0.477606
Gldc	0.29447	0	4.14462	0.588941	2.13331
Etv4	0.294429	0	1.5873	0.588857	6.84568
Tspan9	0.294271	0	17.6367	0.588543	21.8531
Stat5a	0.293586	0	2.38095	0.587172	1.44343
Cmya5	0.293578	0	2.1164	0.587156	3.18404
Eps15	0.293499	0	39.3298	0.586999	32.318
Sall3	0.29336	0	0.793651	0.58672	5.52961
Gpd2	0.293	0	14.1975	0.585999	19.3696
Adamts19	0.292801	0	0.440917	0.585602	1.35852
Gm30382	0.292025	0	0	0.584049	3.84207
Frmpd1	0.29183	0	10.3175	0.583659	10.5922
Lhfpl3	0.291564	0	6.79012	0.583128	45.5317
Mdk	0.291467	0	43.4744	0.582934	6.63341
Sycp3	0.291398	0	3.08642	0.582797	22.0866
Ramp1	0.291326	0	21.5168	0.582652	12.8211
Syn2	0.291197	0	10.582	0.582395	22.0866
Gm20515	0.291022	0	0	0.582043	0.997665
Ntng2	0.290844	0	1.76367	0.581688	7.1004
Apln	0.290665	0	1.23457	0.581329	1.05073
Raver2	0.290658	0	4.2328	0.581317	4.31968
Me1	0.290591	0	12.0811	0.581183	7.1004
Cdh10	0.290187	0	14.4621	0.580374	45.6273
Egfl6	0.289896	0	1.0582	0.579792	1.11441
Gm11128	0.289737	0	0	0.579475	1.85736
Echdc2	0.289691	0	2.6455	0.579383	3.24772
4932430I15Rik	0.289672	0	0	0.579344	1.36914
Cap2	0.289637	0	6.52557	0.579275	10.0403
Tmem52	0.289454	0	5.73192	0.578908	1.25239
Gna13	0.289054	0	20.7231	0.578108	9.9342
Heyl	0.288466	0	0.440917	0.576932	2.14392
RP24-136L4.5	0.288219	0	0	0.576438	0.530673
Mpp6	0.288001	0	36.7725	0.576002	30.3969
Zfp641	0.287917	0	3.08642	0.575834	7.30206
Bcl2	0.287452	0	19.4885	0.574904	22.4687
Endou	0.28706	0	0	0.574121	0.233496
Sardh	0.286988	0	3.26279	0.573975	2.30312
Fam69c	0.286945	0	0	0.573891	1.60263
Scd1	0.286739	0	10.582	0.573477	5.63575
Gm4477	0.286639	0	0	0.573278	3.40692
Slc8b1	0.285986	0	4.67372	0.571972	4.98833
C2cd4d	0.285882	0	1.94004	0.571764	0.5519
Dagla	0.285125	0	1.5873	0.570249	4.9671
Bdh1	0.285058	0	12.963	0.570116	5.66759
Cyp2j6	0.285027	0	4.2328	0.570055	9.39291
Epha4	0.284186	0	5.02646	0.568373	10.6135
Kcnq4	0.284182	0	0.26455	0.568363	2.14392
Enho	0.283832	0	28.3069	0.567665	5.24305
Gadd45g	0.283564	0	16.7549	0.567129	7.71598
Cecr5	0.283298	0	0	0.566597	5.97538
Dclk1	0.283061	0	19.224	0.566123	23.0206
Cyp2d22	0.282255	0	12.8748	0.56451	6.29378
Scd2	0.282221	0.240234	90.9171	0.324207	33.7932
Fam181b	0.280708	0	19.7531	0.561416	2.65336
Hrsp12	0.280144	0	0	0.560289	5.54023
Slc25a35	0.279331	0	1.67549	0.558662	0.933984
Gm11417	0.279283	0	0	0.558567	7.96009
Rgs7	0.278975	0	4.05644	0.557951	23.1586
Whamm	0.277805	0	3.1746	0.555609	5.30673
Gm13832	0.277312	0	0	0.554624	2.25005
Fzd10	0.276916	0	41.358	0.553832	1.64509
Slc25a33	0.276357	0	13.4921	0.552714	4.82912
Gm44151	0.275824	0	0	0.551647	5.79495
B3galt1	0.275809	0	16.9312	0.551618	56.7077
Gm6871	0.275447	0	0	0.550894	2.27128
Gareml	0.274934	0	0	0.549868	1.18871
Desi2	0.274155	0	9.52381	0.548309	23.2647
Irx2	0.273833	0	2.38095	0.547665	0.965825
Limk2	0.27353	0	10.9347	0.54706	17.4591
Pxmp2	0.273423	0	3.88007	0.546847	3.2371
Tpcn1	0.273409	0	22.2222	0.546817	11.367
Arhgef12	0.273338	0	23.545	0.546676	38.3995
Inhba	0.273259	0	0.26455	0.546517	1.15687
Hif1a	0.27276	0	10.4938	0.54552	11.1441
Tmem229a	0.27271	0	5.82011	0.54542	3.67226
Adgrl3	0.272601	0	32.1869	0.545201	75.1645
Hivep3	0.271767	0	16.4903	0.543534	28.3485
Hapln1	0.271589	0	3.79189	0.543178	0.955211
Macrod1	0.271552	0	10.3175	0.543103	15.4001
Cpq	0.271332	0	27.866	0.542663	35.9796
Arap2	0.271195	0	17.6367	0.54239	22.9994
Adra2a	0.270552	0	6.52557	0.541104	2.13331
Gm28411	0.269336	0	0	0.538672	3.44937
Ivd	0.269315	0	17.1958	0.538631	11.1654
Arhgap5	0.268762	0	28.3069	0.537525	41.3819
Plod2	0.268654	0	5.55556	0.537308	6.30439
Klf15	0.268453	0	11.1111	0.536906	3.76778
Pfkp	0.268344	0	4.58554	0.536688	11.6642
D930020B18Rik	0.267842	0	0.26455	0.535684	1.8892
Glipr2	0.267789	0	7.40741	0.535577	1.96349
Astn1	0.267772	0.0214844	45.679	0.51406	26.194
Irak2	0.267271	0	3.61552	0.534542	12.6088
Sgip1	0.267182	0	14.0212	0.534365	34.3451
Lppos	0.267148	0	0	0.534295	1.8892
Adgrb2	0.266742	0	5.29101	0.533484	6.85629
Kifc3	0.266192	0	2.99824	0.532385	9.04267
Zswim5	0.265608	0	3.26279	0.531215	10.9743
St8sia5	0.265297	0	5.29101	0.530595	2.89747
2810049E08Rik	0.265278	0	1.41093	0.530556	1.75122
Gm30731	0.265029	0	0.705467	0.530058	0.604967
Smpd2	0.264785	0	3.52734	0.529571	6.84568
Gm21954	0.264243	0	0	0.528487	0.753556
Phkb	0.264064	0	14.1093	0.528129	26.1197
Tspan7	0.263829	0.03125	36.1552	0.496408	27.0749
Sycp2	0.263649	0	0.793651	0.527299	11.4519
Ccdc85a	0.263591	0	2.6455	0.527182	21.2906
Pcdh10	0.2633	0	33.5979	0.526601	13.7869
Exd1	0.263133	0	0.793651	0.526267	2.15453
Naprt	0.262422	0	1.5873	0.524845	2.19699
Lrrc4c	0.262372	0	6.87831	0.524745	89.9491
Irx5	0.262349	0	1.23457	0.524699	1.77245
Gm43192	0.262052	0	0	0.524103	0.700488
Slc14a1	0.261749	0	12.2575	0.523498	3.48121
Taf4b	0.261675	0	0.705467	0.523349	3.2371
Arhgef10l	0.261629	0	6.79012	0.523258	10.9212
Cdh20	0.261569	0	8.28924	0.523138	58.9047
Racgap1	0.261522	0	22.4868	0.523044	1.70877
Diaph3	0.260865	0	0.970018	0.52173	5.46593
Fgf1	0.260739	0	3.88007	0.521477	11.505
Nadk2	0.260693	0	10.1411	0.521385	7.11102
Gm43938	0.260311	0	0	0.520623	5.45532
Gm43401	0.260035	0	0	0.52007	0.562513
Kcnj3	0.259685	0	4.40917	0.51937	13.1395
4932438H23Rik	0.259675	0	0.793651	0.51935	2.70643
Mertk	0.259581	0	13.5802	0.519162	19.9851
Mro	0.259197	0	7.05467	0.518394	12.1736
Papss2	0.259061	0	0.970018	0.518122	1.95288
Macf1	0.258826	0	37.7425	0.517651	75.6421
Zfp36l2	0.258614	0	5.73192	0.517228	1.13564
Snta1	0.258388	0	10.3175	0.516777	12.959
Gdpd2	0.257615	0	24.9559	0.51523	5.97538
Gm6277	0.257475	0	0	0.51495	4.85035
Cs	0.256785	0	31.746	0.513571	14.2326
AI854517	0.256567	0	0	0.513135	15.0711
Gm16876	0.256559	0	0	0.513117	0.849077
Lonrf3	0.256555	0	0.881834	0.513111	2.56846
Nr3c2	0.255976	0	4.58554	0.511952	30.6835
Gm9889	0.254856	0	0	0.509713	0.30779
Tprkb	0.253904	0	58.5538	0.507809	20.8661
B230112J18Rik	0.252753	0	0.26455	0.505506	0.509446
Slc24a4	0.252534	0	0.352734	0.505068	2.71705
Mfhas1	0.252461	0	5.02646	0.504922	9.90236
Olfr288	0.252397	0	0	0.504794	0.392698
Lrp1	0.251878	0.123047	61.3757	0.38071	24.3685
Ncoa1	0.251684	0	23.0159	0.503369	34.4725
Znrf3	0.251669	0	12.6984	0.503338	22.7128
Camk2n1	0.251115	0	10.7584	0.50223	9.09573
Bhlhe40	0.251048	0	10.9347	0.502096	4.61685
Mcc	0.250994	0	11.7284	0.501989	25.9711
Slc38a3	0.250955	0	31.2169	0.50191	9.89174
Gm28750	0.250632	0	0	0.501264	0.424538
Arxes1	0.250617	0	6.43739	0.501235	5.22182
Acss2	0.250151	0	3.7037	0.500302	9.45659
Dtx4	0.250132	0	6.61376	0.500265	4.78667
Stambpl1	0.250115	0	0.970018	0.500229	7.02611
Irx3	0.249718	0	1.85185	0.499436	1.29484
Myo6	0.248946	0	27.1605	0.497892	29.7814
Dlg5	0.248819	0	3.96825	0.497639	6.09212
Rgma	0.248241	0	41.6226	0.496482	17.5016
Klhdc7a	0.247965	0	0.26455	0.495929	1.14625
Ntng1	0.247796	0	1.85185	0.495592	16.1325
Cadm2	0.247728	0	30.1587	0.495456	83.1034
Ghr	0.246951	0	4.7619	0.493902	22.3095
Ston2	0.24679	0	5.29101	0.493581	15.2622
Msi2	0.246262	0	42.9453	0.492523	67.4061
Tenm4	0.246036	0	32.4515	0.492072	22.8614
Grid2	0.24595	0	25.9259	0.491901	86.0858
Rbpms2	0.245831	0	1.76367	0.491662	2.09085
Tmem200c	0.245489	0	7.49559	0.490979	0.732329
Sox6	0.244647	0	19.5767	0.489295	46.5188
Fnbp1l	0.243633	0	10.2293	0.487265	9.89174
Sorl1	0.242609	0	30.1587	0.485219	13.702
Slmo1	0.242094	0	0	0.484189	7.32329
Gramd4	0.242029	0	13.7566	0.484057	5.6782
Fam213a	0.241398	0	0	0.482796	13.2668
C030037D09Rik	0.240757	0	0	0.481515	3.06729
Slc20a1	0.239864	0	11.1993	0.479729	9.53089
Fgf14	0.239549	0	12.3457	0.479098	70.1019
E130114P18Rik	0.239092	0	0	0.478185	9.75377
Alpk1	0.238864	0	2.55732	0.477729	6.08151
Pfkfb3	0.238566	0	3.1746	0.477132	3.82084
Cd63	0.23819	0	54.0564	0.47638	11.4307
Ppp2r5a	0.237789	0	32.4515	0.475578	13.0546
Fads1	0.237787	0	52.5573	0.475575	9.63702
Dctd	0.237725	0	0.440917	0.475449	0.721715
Atp13a5	0.237649	0	5.11464	0.475297	9.64763
Smo	0.237497	0	18.4303	0.474994	6.82445
Fam228a	0.237349	0	1.0582	0.474697	3.89514
Hes1	0.236736	0	7.49559	0.473473	9.17003
Ckb	0.236654	0.09375	56.9665	0.379557	41.817
Adgrl1	0.236444	0	17.5485	0.472887	10.1783
Cpeb4	0.236232	0	11.4638	0.472464	15.6973
Sel1l3	0.236199	0	12.6102	0.472397	3.94821
RP23-240M8.2	0.235577	0	0	0.471154	1.92104
5031415H12Rik	0.235522	0	0	0.471045	1.76183
Mgst1	0.235044	0.0859375	58.642	0.384151	6.69709
Tmem44	0.234795	0	2.1164	0.469591	3.90575
Paqr7	0.234046	0	11.2875	0.468091	7.60985
Nol4	0.234031	0	8.20106	0.468062	23.6362
Gm973	0.233789	0	10.8466	0.467577	21.3543
Gm15336	0.23373	0	0	0.46746	2.08024
Rora	0.233453	0	22.134	0.466905	83.8569
Col1a2	0.233431	0	29.3651	0.466861	5.79495
Itga6	0.233295	0	19.8413	0.46659	18.6054
Sox21	0.232515	0	1.14638	0.465029	0.753556
Brinp3	0.231825	0	2.91005	0.46365	36.4997
Pdgfd	0.231702	0	25.5732	0.463403	27.0325
Ciart	0.231625	0	2.02822	0.46325	2.41987
Sorbs1	0.23093	0	43.2099	0.46186	31.6812
Erbb4	0.230711	0	14.3739	0.461423	82.5727
Vit	0.230504	0	5.11464	0.461008	8.70304
Il18	0.230366	0	5.46737	0.460733	5.07323
RP23-216D14.3	0.230195	0	0	0.46039	1.22055
Tpmt	0.228659	0	5.46737	0.457318	2.3668
Srebf1	0.228631	0	26.455	0.457263	7.18531
Galnt18	0.228557	0	2.91005	0.457114	11.7809
Ncan	0.228521	0	2.82187	0.457043	4.52133
Sox5	0.228103	0	17.9894	0.456206	42.8784
Enpep	0.227976	0	18.6067	0.455951	6.26194
Adgrg1	0.227878	0	35.8025	0.455756	6.56973
Gm28876	0.227757	0	0	0.455514	0.711102
Egfem1	0.227681	0	1.0582	0.455363	18.8495
Vps13d	0.227481	0	11.9929	0.454962	19.4545
RP23-207N5.4	0.226856	0	0	0.453713	0.371471
Gm10644	0.226785	0	0	0.453571	3.3114
Gpt2	0.226444	0	17.9894	0.452887	7.14286
Grin2b	0.226434	0	3.96825	0.452868	11.0274
Pde4d	0.225367	0	13.2275	0.450734	64.8482
Bcor	0.224821	0	1.23457	0.449643	7.21715
RP23-4H17.3	0.224068	0	0	0.448135	0.85969
Msi1	0.22394	0	19.1358	0.44788	8.26788
Kirrel3	0.223307	0	24.4268	0.446615	45.7122
Mcur1	0.222743	0	8.81834	0.445487	3.59796
Kctd14	0.222707	0	2.1164	0.445414	0.604967
Tspan32os	0.222701	0	0	0.445402	1.4222
Itm2c	0.222592	0.246094	95.1499	0.19909	27.6056
Rimbp2	0.222542	0	14.1093	0.445085	11.038
Galnt15	0.222379	0	15.6966	0.444757	3.08852
Proca1	0.222297	0	3.88007	0.444594	4.44704
Chn1	0.222105	0	8.99471	0.444211	12.959
Rbm38	0.221931	0	0.617284	0.443863	0.817236
Kcnc4	0.221145	0	4.40917	0.44229	3.48121
Pantr1	0.220123	0	2.55732	0.440246	5.89047
Psap	0.219861	0.207031	81.2169	0.232691	48.6415
Sertad2	0.218945	0	8.73016	0.437889	13.426
Angpt1	0.218563	0	1.5873	0.437126	8.02377
Pbx1	0.217571	0	44.0035	0.435141	54.2029
Thbs2	0.216872	0	3.96825	0.433744	0.849077
Mmgt2	0.216409	0	2.82187	0.432819	2.46232
Timp3	0.214926	0	7.67196	0.429853	17.7882
Myrip	0.214862	0	5.46737	0.429724	7.29145
Mpped1	0.214433	0	0.26455	0.428866	1.56018
Chst8	0.214402	0	2.55732	0.428803	8.3634
Zbtb20	0.214297	0.189453	75.3086	0.23914	86.1282
Snph	0.213869	0	7.67196	0.427739	9.48843
Gm38155	0.213788	0	0	0.427576	1.45404
Ccdc80	0.213459	0	15.3439	0.426918	5.04139
Gm30340	0.213449	0	0	0.426898	0.254723
Prss35	0.213249	0	4.58554	0.426497	0.944598
Ccdc85c	0.212994	0	3.35097	0.425988	0.806623
Dok5	0.212769	0	6.08466	0.425537	6.56973
Cr2	0.212568	0	2.91005	0.425136	1.66631
Frmd4a	0.212184	0	39.0653	0.424367	58.3634
Pgf	0.212057	0	0.617284	0.424114	1.34791
Fabp7	0.211692	0	33.5097	0.423384	2.98238
Sdsl	0.211453	0	3.88007	0.422906	1.8892
Ablim1	0.21139	0	12.6984	0.42278	21.3861
Pbxip1	0.211098	0	45.1499	0.422196	13.2244
Acy1	0.210194	0	1.41093	0.420388	1.51772
Mvd	0.210092	0	1.32275	0.420183	1.94226
Amer2	0.209754	0	10.4056	0.419507	2.83379
Arhgap26	0.209223	0	7.93651	0.418445	25.9817
Ces4a	0.209215	0	0.352734	0.418429	0.933984
Nckap5	0.209103	0	11.0229	0.418205	29.5479
Unc119	0.208433	0	4.14462	0.416865	2.72766
Kmt2c	0.208271	0	17.4603	0.416542	28.2743
Klf9	0.208107	0	28.3069	0.416214	11.0168
E2f6	0.207278	0	4.05644	0.414556	1.69815
Cecr2	0.207208	0	5.64374	0.414415	11.4095
Gpr162	0.207187	0	9.87654	0.414374	6.42114
Mansc1	0.20714	0	1.5873	0.41428	0.509446
Col22a1	0.2071	0	2.38095	0.4142	2.14392
Dmd	0.206767	0	24.9559	0.413535	60.0722
Gm27151	0.20675	0	0	0.4135	2.31373
Chrna7	0.206148	0	0.970018	0.412295	2.00594
Slc30a10	0.206023	0	1.94004	0.412046	2.98238
Fam155a	0.205675	0.0136719	37.8307	0.397678	56.8563
Syne1	0.20464	0	11.6402	0.40928	33.8463
Kcnt1	0.204422	0	4.40917	0.408845	6.63341
Dzip1l	0.204228	0	1.23457	0.408456	3.43876
Dock4	0.204014	0	22.8395	0.408027	59.8174
Fam227b	0.203196	0	0.26455	0.406392	3.43876
Gys1	0.203004	0	6.52557	0.406009	6.91997
Msmo1	0.202803	0	26.455	0.405606	14.1159
Sdk2	0.202454	0	3.1746	0.404908	6.73955
Chst1	0.202407	0	19.4004	0.404814	6.03906
Stk32a	0.200834	0	1.23457	0.401668	10.38
Slc38a1	0.200394	0.177734	68.3422	0.223053	17.7988
Chd9	0.200304	0	19.0476	0.400609	54.7018
Son	0.200011	0	46.5608	0.400022	68.4037
Hnrnpa3	0.199547	0	15.873	0.399094	18.478
Aspg	0.19919	0	0	0.398379	0.520059
Tspan3	0.199078	0.175781	70.7231	0.222375	19.1042
Ppp2r2b	0.198651	0	14.3739	0.397302	44.2157
Gm30524	0.198311	0	2.1164	0.396623	0.520059
Gm17660	0.197825	0	16.3139	0.39565	12.959
Sp9	0.197772	0	0.0881834	0.395544	0.201656
Vash1	0.197678	0	0.793651	0.395356	3.81023
A730056A06Rik	0.197504	0	1.94004	0.395007	2.62152
Enah	0.196975	0	26.8959	0.39395	27.4252
Slc2a10	0.196231	0	4.2328	0.392462	0.58374
Src	0.195835	0	5.46737	0.391669	3.88453
Smarcd2	0.195771	0	5.29101	0.391541	3.57674
Fgfrl1	0.195316	0	9.52381	0.390632	1.87858
Tox2	0.193957	0	2.6455	0.387915	4.12864
Antxr1	0.193235	0	20.4586	0.386469	12.2585
Arid5a	0.193132	0	2.99824	0.386264	1.53895
Gdf11	0.193039	0	5.20282	0.386077	1.52834
Dhtkd1	0.192786	0	2.1164	0.385572	4.17109
Itm2b	0.192729	0.248047	96.5608	0.137411	41.488
Prrx1	0.192678	0	12.963	0.385356	9.49904
Fam19a1	0.1922	0	0	0.3844	16.695
Pax6os1	0.191977	0	1.49912	0.383955	0.838463
Rmst	0.191116	0	32.2751	0.382232	39.5882
Nlgn1	0.190982	0	22.8395	0.381964	83.6234
Per2	0.190511	0	6.17284	0.381021	5.76311
Ampd2	0.19045	0	7.84832	0.3809	5.20059
Utrn	0.190227	0	18.0776	0.380454	35.5657
Maob	0.189368	0	16.9312	0.378736	5.52961
Mgll	0.189275	0	26.9841	0.378549	12.0569
Gm26691	0.189075	0	0	0.37815	8.16175
Bcl6	0.188838	0	8.37743	0.377676	6.55912
Tead1	0.18882	0	15.873	0.37764	17.4061
Gmpr	0.188104	0	9.08289	0.376207	4.68053
RP23-207N5.2	0.187721	0	0	0.375443	1.11441
Ntrk3	0.187622	0	12.8748	0.375243	27.457
Slc41a1	0.187604	0	21.9577	0.375207	4.65931
Syndig1	0.187569	0	1.76367	0.375139	5.21121
Hmgn3	0.187366	0	6.96649	0.374732	10.4967
Negr1	0.18718	0	34.4797	0.374359	57.1853
Pde7b	0.186894	0	11.3757	0.373788	28.4335
Tagln3	0.186625	0	13.7566	0.37325	15.1242
Zfp521	0.186581	0	9.08289	0.373163	17.7882
Nfia	0.18646	0	45.5908	0.37292	70.4097
Mtmr11	0.18573	0	0.440917	0.37146	1.57079
Pdgfc	0.185569	0	2.6455	0.371138	5.46593
4930445B16Rik	0.185467	0	0	0.370934	1.6557
RP23-51L15.5	0.185255	0	0	0.370511	1.69815
Gm43150	0.184655	0	0	0.36931	0.520059
Fam195a	0.184519	0	0	0.369039	1.22055
Glul	0.183971	0.115234	57.4074	0.252707	29.4736
Slc13a5	0.183415	0	4.67372	0.36683	2.89747
Bdh2	0.183371	0	4.7619	0.366742	2.53662
Sbk1	0.183193	0	5.37919	0.366386	2.46232
Pmm1	0.182778	0	9.34744	0.365557	7.11102
C230035I16Rik	0.182733	0	1.32275	0.365465	1.36914
Arntl	0.18262	0	4.40917	0.365239	5.46593
Phactr3	0.182284	0	3.08642	0.364568	16.1112
Axdnd1	0.181893	0	0.176367	0.363786	0.85969
Pank1	0.181214	0	4.7619	0.362429	5.32796
Mtmr10	0.180265	0	7.67196	0.360531	9.01083
Fgf2	0.180022	0	2.6455	0.360044	1.75122
Klf12	0.179916	0	9.17108	0.359832	27.4358
Metrn	0.179905	0	13.6684	0.35981	5.18998
Mtfp1	0.1794	0	2.38095	0.358799	1.93165
Sirpa	0.179162	0	29.2769	0.358323	11.1866
Zfp30	0.17897	0	3.08642	0.35794	2.46232
Gm11884	0.178944	0	0	0.357888	1.40098
Plcb4	0.178674	0	10.2293	0.357347	23.8591
Mid1ip1	0.178181	0	22.6631	0.356363	5.77372
Tulp3	0.178137	0	14.2857	0.356274	18.8707
Slc25a21	0.178031	0	6.96649	0.356061	8.06623
Mfap3l	0.177556	0	1.14638	0.355111	1.9741
Gm14964	0.17737	0	0	0.35474	12.5239
Fzd2	0.177184	0	3.79189	0.354369	1.13564
Tcf7l1	0.177043	0	6.87831	0.354086	9.73254
Aco2	0.176377	0	50.2646	0.352754	14.965
Rorc	0.175986	0	3.08642	0.351971	1.84674
Hsd17b4	0.175859	0	10.4938	0.351719	18.6478
4930402H24Rik	0.175438	0	42.1517	0.350875	57.249
Ddo	0.175369	0	9.25926	0.350738	7.91764
0610043K17Rik	0.175032	0	0.881834	0.350064	3.30079
Hoga1	0.174859	0	0.529101	0.349718	2.23944
Grm8	0.174667	0	30.8642	0.349334	21.0571
Abcb9	0.174602	0	3.88007	0.349204	3.1522
Dab1	0.174462	0	10.4056	0.348925	18.478
Frem2	0.174266	0	3.43915	0.348531	2.65336
Ptpn4	0.173697	0	14.2857	0.347395	19.55
Gm15337	0.173096	0	0	0.346193	0.933984
Kcnma1	0.172856	0	6.96649	0.345712	28.3804
Scrg1	0.172364	0	0.440917	0.344727	5.16875
Ptchd4	0.172261	0	1.49912	0.344523	5.34918
Kcnk10	0.172234	0	0.970018	0.344468	5.9966
Meis2	0.171232	0	22.0459	0.342464	29.9618
Slc39a14	0.171048	0	3.7037	0.342095	3.56612
Spred2	0.170852	0	11.1111	0.341704	12.7998
Mroh7	0.17073	0	0.970018	0.341459	1.29484
Gramd1b	0.170529	0	14.6384	0.341057	17.1726
Gm2115	0.170464	0	0	0.340929	1.51772
Chka	0.169923	0	8.81834	0.339845	15.1454
5930412G12Rik	0.169749	0	0	0.339499	2.48355
Tsc22d3	0.169607	0	15.6085	0.339213	13.3836
Auts2	0.169254	0	13.2275	0.338508	58.3634
Fam214b	0.168623	0	5.82011	0.337246	6.01783
Cyfip1	0.168494	0	23.0159	0.336988	14.5511
Bbox1	0.167513	0	3.61552	0.335027	6.85629
Pnisr	0.167316	0	11.3757	0.334633	41.5092
Camk2d	0.167021	0	24.0741	0.334041	31.1823
Parp3	0.166998	0	1.23457	0.333997	1.4222
Tpd52l1	0.166993	0	4.05644	0.333985	6.52728
Fndc4	0.166873	0	8.20106	0.333747	4.54256
Gm28981	0.16679	0	0	0.333581	1.22055
B230208H11Rik	0.166482	0	0.529101	0.332965	0.615581
Zfyve21	0.16508	0	8.28924	0.33016	2.18637
Xylt1	0.164842	0	6.79012	0.329685	21.3437
Map2	0.164731	0	27.2487	0.329463	35.9053
Ptar1	0.164709	0	0.617284	0.329418	4.55317
Tiparp	0.164515	0	12.7866	0.32903	6.9412
Rab30	0.164474	0	18.6067	0.328949	18.3507
Col1a1	0.164196	0	1.41093	0.328392	1.9741
Gas1	0.164163	0	19.7531	0.328326	1.18871
Foxo1	0.16408	0	23.1922	0.32816	10.6241
Slc25a43	0.163692	0	1.49912	0.327384	1.61325
Pard3b	0.163399	0	15.6966	0.326798	36.1176
Lpp	0.163237	0	18.7831	0.326474	24.5171
Ank2	0.162848	0	33.9506	0.325697	75.6315
Atp2a2	0.16243	0.121094	65.4321	0.203766	25.26
Cit	0.162279	0	15.6085	0.324558	13.9779
Nfyc	0.16068	0	10.582	0.32136	13.7444
Slc5a11	0.159992	0	0.352734	0.319984	1.8149
Snn	0.159761	0	7.49559	0.319522	2.39864
Tmem56	0.159723	0	3.96825	0.319447	4.63808
Abhd14b	0.159272	0	0	0.318543	7.5674
Kidins220	0.158872	0	35.7143	0.317744	23.668
Abca1	0.158336	0	12.4339	0.316671	10.6453
Akr1b10	0.157804	0	9.87654	0.315608	4.19232
Lrrc2	0.157795	0	9.87654	0.31559	1.53895
Glis3	0.157372	0	9.25926	0.314744	22.0866
Gphn	0.157336	0	20.8113	0.314673	56.2407
Sugct	0.157032	0	7.31922	0.314064	10.8151
Lrrc75b	0.15688	0	3.08642	0.31376	1.46466
Mkln1os	0.156747	0	1.5873	0.313494	1.62386
RP24-112I14.3	0.156545	0	0	0.313091	1.82551
Slc25a54	0.15634	0	0.0881834	0.31268	1.62386
Cdh19	0.156334	0	2.55732	0.312667	21.6621
Tmem110	0.155866	0	0	0.311732	7.41881
Osbpl9	0.155272	0	20.9877	0.310545	27.7754
Kalrn	0.155219	0	5.29101	0.310437	14.3812
Mxd1	0.1552	0	1.76367	0.3104	2.30312
Paqr4	0.155098	0	20.6349	0.310195	2.23944
Ppp1r14c	0.154919	0	6.87831	0.309839	9.57334
Celf2	0.154707	0	29.3651	0.309413	35.0032
Zeb1	0.154666	0	8.37743	0.309332	29.049
Rap2b	0.153814	0	2.46914	0.307629	1.44343
Tox	0.153811	0	5.29101	0.307622	16.4933
Hey1	0.153706	0	5.46737	0.307412	2.10146
Ubr5	0.153425	0	20.3704	0.306851	18.0959
Lama2	0.153353	0	40.2998	0.306705	33.9525
Ssbp2	0.152946	0	13.933	0.305892	21.4816
Tle4	0.152873	0	15.7848	0.305746	13.5746
Notch1	0.152781	0	2.82187	0.305563	7.1004
Ehbp1	0.152449	0	11.1111	0.304898	32.8168
Cpeb1	0.152407	0	19.9295	0.304815	12.4708
Celsr2	0.152324	0	21.3404	0.304649	6.4636
Rasa2	0.152263	0	15.6966	0.304526	14.3494
Pdlim4	0.151911	0	8.20106	0.303822	3.13097
Wfs1	0.151767	0	16.3139	0.303534	2.97177
Cybrd1	0.151586	0	2.91005	0.303172	0.796009
Plscr4	0.151234	0	7.31922	0.302468	9.82806
A830082K12Rik	0.151213	0	0	0.302427	9.11696
Cd163	0.150465	0	0.176367	0.30093	0.201656
Trak1	0.150456	0	20.1058	0.300912	8.80917
Slc3a2	0.149639	0.130859	64.9912	0.168418	13.5215
Notch2	0.149353	0	21.6931	0.298707	11.3989
Gm21807	0.148958	0	0	0.297916	0.541286
Etv5	0.148788	0	2.29277	0.297577	8.31034
Wsb1	0.148379	0	8.11287	0.296758	14.4237
Slc22a4	0.148079	0	25.6614	0.296158	6.68648
Mmp14	0.147986	0	26.2787	0.295972	1.9741
Tmem176a	0.147979	0	6.17284	0.295957	2.80195
4831440E17Rik	0.147852	0	0	0.295703	1.263
Nrxn3	0.147739	0	33.7743	0.295478	63.4685
Impa2	0.147701	0	0.0881834	0.295401	0.849077
Nr2f1	0.147693	0	35.7143	0.295386	8.57567
Zfp219	0.147295	0	2.02822	0.294591	4.04373
Xpr1	0.14725	0	20.7231	0.294501	16.228
Gm1043	0.147233	0	0	0.294467	3.06729
Pygl	0.147225	0	1.23457	0.29445	1.31607
Disc1	0.146929	0	1.14638	0.293859	6.18765
Fam65b	0.146572	0	0	0.293145	6.56973
Gpd1	0.146433	0	18.8713	0.292865	4.05434
Dolk	0.146412	0	3.26279	0.292823	2.12269
Col11a1	0.146208	0	8.02469	0.292416	8.24666
Rabep1	0.145949	0	8.81834	0.291899	23.8803
Gm17750	0.145922	0	1.85185	0.291845	2.05901
Pcdh9	0.145636	0	26.0141	0.291272	92.7722
Ncam1	0.145581	0	50.4409	0.291162	60.8576
Duxbl1	0.145325	0	0.26455	0.290649	0.976438
Frmpd1os	0.144051	0	0.440917	0.288102	0.350244
Cdc42bpg	0.143516	0	0.881834	0.287031	0.870304
Ifrd1	0.143312	0	6.43739	0.286623	6.06028
Hsdl2	0.143118	0	14.3739	0.286237	4.3409
Ncam2	0.141908	0.125	12.6984	0.158816	48.9493
Grina	0.141751	0	39.2416	0.283502	18.892
Itpr2	0.141476	0	4.49735	0.282953	13.6383
Ptprj	0.140914	0	3.61552	0.281828	19.879
Zfpm2	0.14082	0	12.3457	0.281639	30.8958
Lxn	0.140296	0	9.34744	0.280592	3.79962
Mettl24	0.140205	0	3.43915	0.280409	5.59329
Inca1	0.140041	0	1.23457	0.280081	1.77245
Pid1	0.139784	0	8.73016	0.279569	30.1316
A930012L18Rik	0.139542	0	0.176367	0.279085	0.615581
Nfib	0.139351	0	51.6755	0.278702	43.3772
Abi1	0.139251	0	10.9347	0.278501	18.4993
Chchd3	0.139155	0	16.843	0.278311	21.3331
Dpf1	0.138994	0	0.705467	0.277988	2.71705
Cyp2j8	0.138333	0	0.440917	0.276666	1.15687
Asic2	0.137612	0	7.40741	0.275224	23.5513
Kif7	0.13724	0	0.617284	0.274481	0.902144
Ugp2	0.137124	0	14.9912	0.274249	11.9932
Lpar4	0.137067	0	3.88007	0.274134	1.53895
Spsb4	0.136913	0	1.23457	0.273826	2.12269
Mapk10	0.136889	0	23.2804	0.273777	31.6599
Adora1	0.136504	0	7.14286	0.273008	4.92464
Sh3d21	0.135975	0	0.617284	0.27195	0.965825
Gabbr1	0.135827	0	32.9806	0.271654	22.3626
Gulp1	0.13563	0	2.6455	0.27126	12.2798
Atp5o	0.134856	0	18.0776	0.269713	18.5523
Ccdc136	0.134625	0	14.0212	0.26925	10.0509
Pgpep1	0.134216	0	8.55379	0.268431	2.84441
Asph	0.134121	0	16.843	0.268242	11.2184
Klhl5	0.133928	0	6.43739	0.267857	10.38
Nsdhl	0.133893	0	8.02469	0.267786	3.95882
Asap1	0.133795	0	15.5203	0.26759	30.3014
Nxn	0.133544	0	22.8395	0.267087	21.6302
Plcd1	0.133437	0	17.7249	0.266873	3.58735
Snrnp70	0.133288	0	12.4339	0.266576	41.0953
Tcf7l2	0.133071	0	16.2257	0.266141	21.6621
Dbi	0.131455	0.195312	78.2187	0.0675975	22.1609
Cpeb3	0.131296	0	7.67196	0.262592	32.1269
Slc26a8	0.131276	0	1.41093	0.262553	1.71938
Ttll3	0.13117	0	9.52381	0.26234	13.0121
Svep1	0.131117	0	1.0582	0.262234	1.11441
Jam2	0.131057	0	26.3668	0.262115	9.22309
Hddc2	0.131036	0	1.5873	0.262072	3.03545
Ank	0.13052	0.046875	42.5044	0.214165	20.3885
Hacd3	0.130451	0	31.0406	0.260903	10.0828
Kcna2	0.130094	0	8.73016	0.260188	3.24772
Aldh5a1	0.12998	0	11.9048	0.259961	2.51539
2610507B11Rik	0.129973	0	25.1323	0.259946	8.21482
Trib1	0.129104	0	0.617284	0.258208	1.263
Eci1	0.128933	0	8.20106	0.257866	4.17109
Trhde	0.128794	0	1.94004	0.257588	8.17236
Zfp423	0.128587	0	7.23104	0.257175	9.97665
Igdcc3	0.128526	0	1.41093	0.257053	1.62386
Gm11146	0.128168	0	0	0.256335	1.40098
Aldh7a1	0.127997	0	16.3139	0.255994	6.55912
Pxmp4	0.127777	0	5.64374	0.255555	2.96115
Nkx2-2os	0.127577	0	0.352734	0.255153	6.61218
Gm16833	0.127542	0	0	0.255084	2.6852
Slc24a3	0.127408	0	8.73016	0.254816	18.0217
Fgd4	0.127187	0	11.4638	0.254375	13.7975
Qk	0.127085	0	62.3457	0.25417	70.208
Pnp	0.127001	0	0.617284	0.254002	3.73594
Lrp1b	0.126986	0	22.6631	0.253972	79.0066
Asic1	0.126947	0	2.20459	0.253894	3.66164
Slc9a3r1	0.126897	0	9.87654	0.253794	3.00361
Gm26588	0.126889	0	0	0.253779	0.477606
Rnf215	0.126883	0	12.8748	0.253765	4.46827
4933431E20Rik	0.126744	0	4.58554	0.253488	3.37508
Rxra	0.126728	0	6.52557	0.253455	1.28423
Colec12	0.126633	0	5.02646	0.253265	8.9153
Rab8b	0.126156	0	6.43739	0.252311	9.17003
Ralgds	0.126107	0	6.61376	0.252213	6.02844
Nnat	0.126105	0	33.4215	0.252211	31.9147
P4ha3	0.125876	0	3.35097	0.251753	1.17809
Akap6	0.125876	0	11.552	0.251753	32.2968
Sema6d	0.125711	0	38.7125	0.251422	34.4513
Lurap1	0.125707	0	0.793651	0.251415	3.94821
Il17ra	0.125499	0	4.58554	0.250999	2.27128
Omg	0.125441	0.234375	9.52381	0.0165062	3.4706
Acp6	0.125416	0	2.1164	0.250831	3.61919
Gm44386	0.125338	0	0	0.250676	1.75122
Pcdh11x	0.125249	0	5.73192	0.250499	20.8024
Rab11fip4	0.125086	0	5.29101	0.250172	5.69943
Pfas	0.125059	0	5.37919	0.250117	5.84802
Malat1	0.125	0	43.739	0.25	100
Rtn3	0.124848	0.160156	67.3721	0.089539	28.6457
Ccdc122	0.124653	0	2.02822	0.249307	3.06729
Nek8	0.124135	0	2.55732	0.24827	1.83613
Agpat3	0.123911	0	26.2787	0.247821	7.83273
BC034090	0.123481	0	2.73369	0.246962	1.95288
Ccbl1	0.1234	0	0	0.246801	3.4706
Kcnn3	0.123317	0	7.58377	0.246635	6.87752
Bmpr1a	0.123194	0	20.9877	0.246387	12.2161
1110019D14Rik	0.122733	0	5.20282	0.245467	10.8151
Il1rapl1	0.122657	0	14.903	0.245314	66.8329
Arhgap42	0.121711	0	5.82011	0.243421	9.41414
Car14	0.1217	0	1.41093	0.2434	7.29145
Trmt1	0.121694	0	3.43915	0.243388	5.22182
Tle2	0.121304	0	0.26455	0.242607	5.9117
9330179D12Rik	0.120957	0	10.8466	0.241914	1.263
Rab29	0.120724	0	3.7037	0.241447	1.39036
Cdh2	0.120092	0	35.7143	0.240185	27.6799
Scara3	0.119716	0	2.82187	0.239432	0.636807
Gpm6b	0.119695	0	83.6861	0.23939	47.3254
Mical1	0.119582	0	0.0881834	0.239163	1.39036
Lysmd2	0.119329	0	14.1093	0.238659	3.06729
Slc35d1	0.118813	0	11.1993	0.237626	7.77966
Ror2	0.11871	0	2.82187	0.237421	3.55551
Tmem106b	0.118603	0	31.9224	0.237207	5.75249
Ldhb	0.118389	0.0644531	54.4092	0.172325	19.8896
Tmem100	0.118163	0	6.08466	0.236326	5.60391
Pex11a	0.118033	0	4.40917	0.236066	0.806623
Pitpnm2	0.117719	0	27.9541	0.235438	9.60518
Gm29865	0.117597	0	0	0.235194	3.0779
Gm3455	0.1175	0	0	0.235	0.137975
Srsf1	0.11724	0	15.7848	0.234481	13.8187
Atp1a1	0.117188	0.234375	89.418	0	8.42709
Epb41l5	0.116992	0	7.23104	0.233983	7.83273
Fmo1	0.116991	0	2.82187	0.233981	1.48588
Gm3848	0.116612	0	0	0.233224	0.329017
Zhx2	0.116584	0	6.52557	0.233168	9.56273
Cadm4	0.116522	0	25.485	0.233045	8.5969
Tsc22d4	0.116393	0	22.0459	0.232786	13.7657
Igfbp5	0.116211	0.232422	88.7125	0	3.85269
Zfp608	0.116195	0	20.7231	0.232389	36.5952
Apc	0.115979	0	25.0441	0.231957	25.6633
Asb8	0.115547	0	7.67196	0.231094	4.06495
Fkbp10	0.115444	0	4.05644	0.230888	1.07196
Daam2	0.115271	0	6.43739	0.230542	17.2787
Sybu	0.115242	0	11.9929	0.230483	18.3613
Nudt9	0.115169	0	9.87654	0.230339	3.33263
Abl2	0.115077	0	7.49559	0.230154	13.9142
Eno1	0.114554	0	40.388	0.229108	13.6277
Gm9934	0.11426	0	0	0.22852	0.711102
Skap2	0.114054	0	14.5503	0.228109	15.3364
Pik3r1	0.112338	0	11.1993	0.224677	29.3462
Rbm4b	0.111921	0	6.61376	0.223842	21.3967
Tspan32	0.111905	0	0.176367	0.223809	1.75122
C4b	0.111842	0	5.82011	0.223683	2.9187
Slc13a3	0.111764	0	0.881834	0.223529	1.91042
Mroh5	0.111649	0	0.529101	0.223297	0.89153
St6gal2	0.111569	0	9.08289	0.223138	1.34791
Prokr2	0.111368	0.208984	78.9242	0.0137519	2.526
Dera	0.110703	0	0.970018	0.221406	1.4965
Tbc1d9	0.110352	0.220703	84.8325	0	1.76183
Pde8b	0.109437	0	3.43915	0.218874	12.3222
ENSMUSG00000097156	0.109375	0.21875	13.7566	0	0
Dhcr7	0.1093	0	8.37743	0.2186	3.54489
Nav3	0.109056	0	28.9242	0.218112	53.5449
Il15ra	0.108864	0	2.29277	0.217727	3.32201
Magi2	0.108821	0	37.8307	0.217642	81.193
Hotairm1	0.108654	0	1.76367	0.217308	3.29017
Pced1b	0.108537	0	6.87831	0.217075	8.28911
Apc2	0.107686	0	11.3757	0.215372	5.1263
4930570N18Rik	0.107636	0	0	0.215271	1.17809
Wwtr1	0.107518	0	6.70194	0.215036	12.1949
1700019G17Rik	0.107503	0	0	0.215006	1.29484
Gm14211	0.107357	0	0	0.214714	1.29484
Grik5	0.107177	0	7.40741	0.214355	8.03439
Phf21a	0.107091	0	18.5185	0.214182	33.6553
Meis1	0.107029	0	29.8942	0.214058	25.3343
Map2k6	0.107018	0	19.224	0.214036	14.0522
Gm42649	0.106942	0	0	0.213885	0.806623
Bhlhe41	0.106911	0	22.8395	0.213822	7.46126
Flrt1	0.106766	0	6.96649	0.213531	3.74655
Inhbb	0.10661	0	4.14462	0.21322	0.976438
Glis1	0.105942	0	0.352734	0.211884	2.83379
Cxxc4	0.105885	0	4.85009	0.21177	3.68287
Clybl	0.105648	0	11.1993	0.211296	17.4698
Pfkfb4	0.105237	0	3.88007	0.210475	4.83974
Hey2	0.104909	0	8.11287	0.209819	1.18871
Sumo1	0.104637	0	15.873	0.209274	22.1715
Rreb1	0.104402	0	7.14286	0.208804	14.5404
Fam171a1	0.104257	0	6.34921	0.208513	7.15347
Sh3gl2	0.104255	0	6.96649	0.20851	9.37168
Rnf24	0.103908	0	4.67372	0.207816	5.92231
Tmtc2	0.103515	0	16.1376	0.20703	39.9066
Gstt1	0.103329	0	10.6702	0.206658	3.54489
Megf9	0.102453	0	37.478	0.204907	14.2539
Isoc2a	0.102024	0	2.91005	0.204048	2.29251
Taf7l	0.101786	0	0.440917	0.203573	1.93165
Adam11	0.101711	0	5.46737	0.203422	5.58268
ENSMUSG00000101249	0.101562	0.203125	82.2751	0	0
Akap17b	0.101556	0	8.11287	0.203112	6.36807
1700108J01Rik	0.101385	0	0	0.202771	2.35619
Col9a2	0.101334	0	2.38095	0.202669	1.37975
Unc13c	0.101164	0	16.4903	0.202328	17.8412
Cd27	0.100837	0	0.0881834	0.201674	13.4579
Adck1	0.100261	0	2.6455	0.200522	3.8633
Col23a1	0.100169	0	6.34921	0.200337	5.8374
Nav2	0.099407	0	14.8148	0.198814	29.7283
Trib2	0.0986525	0	9.08289	0.197305	4.7336
Cmbl	0.0985264	0	1.49912	0.197053	2.09085
Lair1	0.0982961	0	5.20282	0.196592	5.17937
Acp1	0.0982664	0	4.93827	0.196533	17.9792
Ndrg3	0.0981615	0	18.3422	0.196323	10.8363
Mfge8	0.0981252	0	8.55379	0.19625	3.7041
Spag5	0.097961	0	6.96649	0.195922	52.3031
Nsun7	0.097752	0	5.02646	0.195504	4.91403
Acss3	0.097588	0	5.55556	0.195176	11.6854
Gpx7	0.0970088	0	2.73369	0.194018	0.987052
Cluh	0.0966812	0	11.9048	0.193362	4.23477
Dkk3	0.0966797	0.193359	76.455	0	4.12864
Ssh1	0.0966108	0	14.903	0.193222	5.46593
Tnk2	0.0965789	0	6.43739	0.193158	8.18298
Tmem51	0.0965507	0	0.617284	0.193101	1.95288
Tssc4	0.096486	0	6.08466	0.192972	6.24071
Micall2	0.0964304	0	2.20459	0.192861	0.965825
Ryk	0.0962115	0	18.7831	0.192423	7.67353
Nfkb1	0.0960988	0	11.6402	0.192198	13.9567
Tcf4	0.0960771	0	40.2998	0.192154	52.9718
Pdk2	0.0955018	0	24.7795	0.191004	4.60624
Wnk2	0.0952987	0	17.3721	0.190597	9.89174
Gpatch1	0.0950506	0	3.61552	0.190101	7.93887
Rgl1	0.0944149	0	17.284	0.18883	10.4755
Acacb	0.0942091	0	4.93827	0.188418	3.59796
Fam19a4	0.0937617	0	0	0.187523	1.32668
Prnp	0.09375	0.1875	69.9295	0	0
Hivep2	0.0937257	0	5.55556	0.187451	22.3201
Arhgef28	0.0936796	0	11.9048	0.187359	17.4273
Alpl	0.093573	0	1.23457	0.187146	2.12269
Ttll8	0.0934419	0	3.61552	0.186884	5.86924
Suz12	0.092978	0	5.99647	0.185956	9.43536
Tuba1a	0.0927734	0.185547	73.7213	0	23.1904
Mid2	0.092546	0	5.73192	0.185092	4.24538
Paqr3	0.0924191	0	6.61376	0.184838	10.1146
Dclk2	0.0922501	0	8.64198	0.1845	10.0403
Trim30d	0.0920215	0	1.14638	0.184043	1.51772
Rrbp1	0.0919661	0	17.4603	0.183932	14.9437
Rims2	0.0918742	0	19.7531	0.183748	20.9297
ENSMUSG00000083563	0.0917969	0.183594	75.1323	0	0
Axl	0.0917472	0	14.0212	0.183494	3.59796
Ldlr	0.0915793	0	8.28924	0.183159	8.02377
Dhrs11	0.0911565	0	0.705467	0.182313	1.60263
Sox2	0.0910333	0	31.1287	0.182067	7.25961
Dusp22	0.0907907	0	3.88007	0.181581	5.16875
Mrps5	0.090744	0	4.7619	0.181488	4.55317
Nlgn3	0.090629	0	7.40741	0.181258	4.42581
Galm	0.0904195	0	2.1164	0.180839	1.30546
Ccdc88c	0.0902726	0	4.14462	0.180545	4.9671
Gpc6	0.0900715	0	6.96649	0.180143	27.6693
Cmtm3	0.0900255	0	16.3139	0.180051	1.84674
L3mbtl3	0.0899417	0	8.81834	0.179883	8.84101
Gria2	0.0899039	0	7.58377	0.179808	25.6527
Slc20a2	0.0898438	0.179688	69.5767	0	9.4672
Zfp467	0.0896598	0	5.11464	0.17932	2.37741
Lrp8os2	0.0895426	0	0	0.179085	1.01889
Alms1	0.0892735	0	7.84832	0.178547	10.2101
Fhit	0.0886768	0	4.05644	0.177354	23.3072
Fbln5	0.088593	0	9.61199	0.177186	1.09319
Cry2	0.0885289	0	7.58377	0.177058	6.87752
Prkrir	0.0882029	0	0	0.176406	1.39036
Gm13031	0.0881578	0	0	0.176316	1.20993
Mt3	0.0879273	0	14.903	0.175855	20.5795
Camk1d	0.0878606	0	2.38095	0.175721	11.7173
Tspan33	0.0872472	0	14.5503	0.174494	2.27128
Sigmar1	0.0870134	0	5.29101	0.174027	4.27722
Ptprg	0.0867443	0	12.7866	0.173489	24.6869
Tnfrsf19	0.0865582	0	8.55379	0.173116	5.81617
Fat4	0.0863976	0	1.49912	0.172795	3.45999
Myo19	0.0863141	0	0.970018	0.172628	1.67693
Ephx2	0.0861241	0	8.28924	0.172248	1.62386
Cbx5	0.086101	0	27.6014	0.172202	16.4296
Dok6	0.0860605	0	1.41093	0.172121	15.5487
Scmh1	0.0860335	0	10.2293	0.172067	22.2458
Gm26827	0.085495	0	0	0.17099	1.27361
1700027A15Rik	0.0854708	0	0.0881834	0.170942	0.382084
Ak1	0.0853942	0	9.25926	0.170788	2.69582
Ctnna2	0.0851064	0	17.6367	0.170213	57.6311
Wif1	0.0849609	0.169922	70.9877	0	0.721715
Rnd3	0.0847986	0	1.0582	0.169597	3.03545
Ahdc1	0.0846874	0	5.29101	0.169375	7.94948
Prune2	0.0846739	0	20.2822	0.169348	19.9215
Lix1l	0.0831433	0	7.76014	0.166287	3.51305
Pvrl3	0.0830621	0	0	0.166124	4.22416
Inppl1	0.0830354	0	7.40741	0.166071	2.66398
Cacnb1	0.0829902	0	3.35097	0.16598	2.27128
Ammecr1	0.0829902	0	3.26279	0.16598	5.9117
Slco4a1	0.0829861	0	0.617284	0.165972	0.764169
Arsj	0.0829662	0	0.26455	0.165932	1.25239
Mpv17l2	0.0828589	0	6.70194	0.165718	1.93165
Hlf	0.0828333	0	8.90653	0.165667	5.94354
Dab2	0.0827576	0	7.84832	0.165515	6.66525
Med12l	0.0825576	0	1.5873	0.165115	11.7279
Ambra1	0.0824928	0	11.8166	0.164986	30.5243
Rb1	0.0821333	0	13.6684	0.164267	17.6183
Tmem136	0.082093	0	2.73369	0.164186	1.17809
Brinp2	0.0814633	0	10.2293	0.162927	6.24071
Tab2	0.0814603	0	27.6014	0.162921	12.0038
Ppp3ca	0.0806738	0	31.746	0.161348	38.8877
Ccnjl	0.0804916	0	2.46914	0.160983	4.14986
Kif1b	0.0803602	0	38.7125	0.16072	45.5423
Tmie	0.0802454	0	5.73192	0.160491	1.71938
9530026P05Rik	0.0799494	0	4.2328	0.159899	19.4757
Pcdh17	0.0799199	0	13.1393	0.15984	11.8128
Vangl2	0.0798788	0	18.1658	0.159758	3.36447
Mtx3	0.0796655	0	2.29277	0.159331	1.86797
Ankrd40	0.0794809	0	14.1975	0.158962	5.38102
Gm42948	0.0793081	0	0	0.158616	0.286563
Spred1	0.0792195	0	15.7848	0.158439	10.4012
Syt11	0.0791016	0.158203	66.7549	0	20.4415
Ccdc88a	0.0790807	0	23.2804	0.158161	29.8981
Ttc14	0.0789764	0	9.70018	0.157953	23.1692
Igfbp2	0.0789488	0	2.20459	0.157898	2.12269
Capn2	0.0787812	0	13.4039	0.157562	7.4931
Tnfaip8	0.0787494	0	2.99824	0.157499	4.01189
Kansl1l	0.078525	0	5.11464	0.15705	18.7752
Fbxl7	0.0784845	0	8.55379	0.156969	13.4791
Grip1	0.0784223	0	9.70018	0.156845	16.2917
Meg3	0.0783466	0	12.6102	0.156693	65.9096
Ptpn9	0.0783277	0	6.70194	0.156655	13.6914
March3	0.0783115	0	1.0582	0.156623	10.4967
Crlf3	0.0781207	0	7.49559	0.156241	10.1359
Homer2	0.0779273	0	4.40917	0.155855	2.82318
Pamr1	0.0777765	0	15.3439	0.155553	2.93993
Gm26742	0.0771099	0	0	0.15422	9.78561
Ak2	0.0770809	0	3.61552	0.154162	3.92698
Kif1a	0.0768254	0	20.8113	0.153651	15.4744
Kcnip4	0.0766844	0	8.90653	0.153369	33.0397
Tnrc6b	0.0764628	0	25.5732	0.152926	32.3074
Snrk	0.0764384	0	8.73016	0.152877	10.1359
Aff1	0.0764195	0	6.61376	0.152839	10.0934
2900076A07Rik	0.0763819	0	1.0582	0.152764	4.78667
Pigm	0.0763641	0	5.55556	0.152728	1.17809
Vhl	0.0762954	0	8.28924	0.152591	1.41159
Ccdc58	0.0761728	0	3.52734	0.152346	8.07684
Eya4	0.0758704	0	0.705467	0.151741	3.13097
Macrod2	0.0756871	0	16.3139	0.151374	37.5292
Klhl32	0.0756119	0	16.2257	0.151224	11.8871
Adamts5	0.0755722	0	1.32275	0.151144	1.3373
Pts	0.0753865	0	4.40917	0.150773	3.14158
Smad3	0.0753843	0	9.61199	0.150769	5.8374
Polr2d	0.0752618	0	3.08642	0.150524	0.923371
Aldh9a1	0.0752342	0	10.6702	0.150468	2.45171
Pdgfrb	0.0750924	0	4.2328	0.150185	5.06262
Exoc4	0.0750222	0	18.8713	0.150044	36.5634
Kiz	0.0748656	0	6.17284	0.149731	13.9036
Ogt	0.0746897	0	27.9541	0.149379	33.305
Gm2163	0.0744275	0	0	0.148855	12.7574
Actb	0.0742188	0.148438	70.5467	0	28.253
Oaf	0.0742157	0	5.46737	0.148431	0.902144
Tead3	0.0741282	0	1.23457	0.148256	0.880917
Igsf11	0.0740704	0	23.2804	0.148141	24.4216
Dbp	0.0740235	0	0.617284	0.148047	4.65931
Vezf1	0.0739564	0	14.5503	0.147913	6.44237
4930570G19Rik	0.0738907	0	2.55732	0.147781	2.26067
Gm37679	0.073632	0	0	0.147264	6.02844
Gm10600	0.0735843	0	0	0.147169	2.00594
Adgrg6	0.07336	0	2.1164	0.14672	3.49183
Slc25a23	0.0733468	0	14.0212	0.146694	7.47187
Leng8	0.0733185	0	0.176367	0.146637	14.6253
Timm23	0.0732758	0	5.37919	0.146552	5.32796
Smpdl3a	0.0732213	0	14.9912	0.146443	3.30079
Gm12709	0.0731037	0	1.49912	0.146207	5.82679
Ing2	0.0726467	0	3.43915	0.145293	0.912757
Glb1l	0.0725792	0	1.76367	0.145158	2.57907
4833422C13Rik	0.0724909	0	1.85185	0.144982	0.700488
Id3	0.0724281	0.0703125	52.7337	0.0745438	8.84101
Dock7	0.072268	0	12.0811	0.144536	12.5345
Mir703	0.0722656	0.144531	68.8713	0	0
Edn1	0.0721279	0	0	0.144256	0.615581
Gjb2	0.0718615	0	7.31922	0.143723	0.933984
Cped1	0.0718077	0	1.14638	0.143615	8.57567
Gm20383	0.0716928	0	0.0881834	0.143386	0.286563
Abcd3	0.0715445	0	22.2222	0.143089	9.78561
Ptn	0.0712891	0.142578	64.3739	0	22.6067
P2ry2	0.0706049	0	0	0.14121	0.0212269
Mus81	0.0705348	0	1.41093	0.14107	1.8892
ENSMUSG00000102070	0.0703125	0.140625	69.1358	0	0
Smgc	0.0701697	0	0	0.140339	0.0318404
Rhobtb3	0.0701613	0	6.26102	0.140323	5.85863
Taf1b	0.0701411	0	2.38095	0.140282	7.90703
Acer3	0.0700814	0	8.64198	0.140163	12.2585
Renbp	0.0700571	0	1.41093	0.140114	1.63447
Gnaq	0.0700355	0	69.4004	0.140071	28.9004
Homer3	0.0698893	0	2.82187	0.139779	2.17576
Osbpl11	0.0698463	0	3.96825	0.139693	7.19592
Cyp2j7	0.0697346	0	0	0.139469	0.0318404
Cyp51	0.0696951	0	17.3721	0.13939	5.22182
Pdpn	0.0696726	0	20.7231	0.139345	3.58735
Fam124b	0.0696258	0	0.0881834	0.139252	0.0212269
Gm7676	0.069517	0	0	0.139034	0.0212269
Slc25a20	0.0694249	0	7.40741	0.13885	3.39631
Grid1	0.0694057	0	4.67372	0.138811	15.7079
Gria4	0.0693706	0	5.02646	0.138741	31.0762
Gm26835	0.0692625	0	0	0.138525	10.3481
mt-Co3	0.0692598	0	0	0.13852	35.5232
Lrrc75a	0.0692138	0	1.23457	0.138428	1.12503
Ncf4	0.0690818	0	0	0.138164	0.0106135
Nt5c2	0.0689895	0	6.61376	0.137979	11.9295
Ctnna3	0.0689585	0	5.02646	0.137917	36.6801
Ccdc18	0.068756	0	1.32275	0.137512	1.77245
Rgl3	0.0687044	0	1.23457	0.137409	1.4965
Rbm39	0.0685949	0	27.9541	0.13719	43.3666
Trp53cor1	0.0684354	0	1.23457	0.136871	3.39631
Tekt3	0.0683203	0	0.26455	0.136641	0.0424538
Dock11	0.0682489	0	7.84832	0.136498	7.11102
Icosl	0.0681759	0	5.55556	0.136352	1.47527
Luc7l3	0.0681651	0	11.4638	0.13633	22.3095
Nkx2-2	0.0681449	0	0.440917	0.13629	4.00127
Strip1	0.0679119	0	7.76014	0.135824	5.65697
Gm20388	0.0678191	0	0	0.135638	51.0826
Tmem170b	0.0676774	0	4.14462	0.135355	2.93993
Nrf1	0.0676543	0	6.61376	0.135309	14.169
Prex1	0.0675587	0	11.552	0.135117	10.9212
Evc2	0.067364	0	2.46914	0.134728	1.43282
Shroom4	0.0673053	0	0.26455	0.134611	5.76311
2010007H06Rik	0.0672897	0	0	0.134579	0.785396
Pafah2	0.0672257	0	1.67549	0.134451	1.95288
Dtx3	0.0670407	0	18.1658	0.134081	16.1112
Tapt1	0.0668326	0	10.2293	0.133665	5.62513
Pdss1	0.0666264	0	1.94004	0.133253	3.96943
ENSMUSG00000100862	0.0664062	0.132812	66.3139	0	0
Cmtm5	0.066362	0	17.0194	0.132724	6.93059
Maml2	0.0662596	0	26.1023	0.132519	13.6277
Myo10	0.0662542	0	11.8166	0.132508	24.6338
Tlr1	0.0662533	0	0	0.132507	0.0106135
Gm11264	0.0659269	0	0.705467	0.131854	0.0318404
Fndc5	0.0659002	0	14.8148	0.1318	2.02717
Chsy1	0.0657758	0	10.8466	0.131552	4.44704
Smim3	0.0657376	0	3.1746	0.131475	1.34791
Glmp	0.0657355	0	13.8448	0.131471	4.19232
Ppm1k	0.0657345	0	4.67372	0.131469	4.40459
Prkar2a	0.0655094	0	9.70018	0.131019	6.29378
Gm17133	0.0654917	0	0	0.130983	0.0106135
Plin2	0.0654773	0	2.91005	0.130955	2.58968
Zbtb33	0.0654628	0	0.0881834	0.130926	0.520059
Dll4	0.0651654	0	0.0881834	0.130331	0.0318404
Bambi	0.065121	0	12.6984	0.130242	0.796009
D630003M21Rik	0.0649974	0	0.176367	0.129995	1.41159
Echdc1	0.0649648	0	3.35097	0.12993	9.3823
Idh1	0.0649577	0	11.1993	0.129915	5.48716
Cuedc1	0.064838	0	0	0.129676	16.6737
Ndufaf4	0.0648374	0	3.26279	0.129675	4.07557
Klrb1f	0.0646214	0	0	0.129243	0.0212269
Maoa	0.0645853	0	14.1975	0.129171	7.74782
Gm15758	0.0645126	0	0	0.129025	0.0106135
Rnf182	0.0643313	0	19.5767	0.128663	7.08979
Pydc3	0.064295	0	0	0.12859	0.0106135
Prkca	0.0641622	0	10.3175	0.128324	32.3817
Agfg2	0.0641426	0	4.40917	0.128285	4.93526
Cachd1	0.0640981	0	23.4568	0.128196	16.3023
Fam214a	0.0640798	0	18.254	0.12816	12.7574
Gm43003	0.0639687	0	0	0.127937	0.0849077
Asap2	0.063956	0	6.96649	0.127912	10.4649
P2ry14	0.0637757	0	1.76367	0.127551	10.2314
2610028H24Rik	0.0637511	0	0.0881834	0.127502	0.0212269
Ryr2	0.0634766	0.126953	64.1975	0	4.76544
Gm13389	0.0634247	0	0	0.126849	0.0106135
Ddit4	0.0633329	0	14.3739	0.126666	3.41753
Gm13963	0.0633162	0	0	0.126632	1.3373
Pilrb2	0.0633159	0	0	0.126632	0.0106135
mt-Co1	0.0632757	0	0	0.126551	33.6128
Eif2ak2	0.063246	0	3.88007	0.126492	2.17576
Tob2	0.0630868	0	13.3157	0.126174	4.28784
Dlx4	0.0629896	0	0.176367	0.125979	0.0212269
Arhgef37	0.0628146	0	0.881834	0.125629	3.1522
Smlr1	0.062772	0	0.0881834	0.125544	0.0212269
Fbxw10	0.0626799	0	0.352734	0.12536	1.70877
Six5	0.0625973	0	1.23457	0.125195	0.838463
Crim1	0.0625568	0	19.9295	0.125114	14.0841
Hrg	0.0624456	0	0.176367	0.124891	0.0106135
Taf13	0.0621622	0	3.88007	0.124324	4.4152
Gm11636	0.0620648	0	0	0.12413	0.0106135
4921507G05Rik	0.0620648	0	0.0881834	0.12413	0.137975
Sirt5	0.0618377	0	2.91005	0.123675	5.05201
Chad	0.0617929	0	1.85185	0.123586	0.0212269
Atad2b	0.0617297	0	6.43739	0.123459	19.6774
Spag9	0.0617243	0	29.806	0.123449	26.2789
Gm16130	0.0615753	0	0	0.123151	0.0212269
Insig1	0.0615279	0	7.67196	0.123056	8.95776
Gm16325	0.0614665	0	0	0.122933	0.116748
Eci2	0.0614513	0	12.522	0.122903	6.97304
Laptm4a	0.0613135	0	79.6296	0.122627	21.2269
Snx14	0.0611852	0	15.873	0.12237	4.28784
Clasp1	0.0611243	0	10.6702	0.122249	13.9885
Ccnl2	0.0611216	0	7.14286	0.122243	16.366
Stk10	0.0610405	0	2.20459	0.122081	3.92698
Luc7l2	0.0608378	0	24.6914	0.121676	34.9501
Gm17225	0.060705	0	0	0.12141	0.371471
Trio	0.0605756	0	20.2822	0.121151	16.4402
Cpt1a	0.0604528	0	16.4903	0.120906	3.32201
Tet2	0.0602513	0	5.20282	0.120503	10.9531
Tnni2	0.0600522	0	0	0.120104	0.0106135
Manea	0.0600425	0	18.1658	0.120085	2.72766
Ctsf	0.0600183	0	8.11287	0.120037	4.70176
Tecr	0.0599512	0	42.0635	0.119902	35.0775
Tmem129	0.0598581	0	12.963	0.119716	1.57079
Zfp286	0.0596557	0	1.49912	0.119311	2.51539
Gm12830	0.0596171	0	0	0.119234	0.0106135
Tmcc3	0.0593972	0	42.5044	0.118794	35.0563
mt-Atp6	0.0592863	0	0	0.118573	29.2295
9330159F19Rik	0.0591281	0	7.31922	0.118256	14.8482
Ckap5	0.0590994	0	30.5996	0.118199	20.3248
Lrrc58	0.0589745	0.0351562	49.9118	0.0827928	10.5179
Gm42800	0.0588555	0	0	0.117711	0.0106135
Npr2	0.0586913	0	11.9929	0.117383	2.35619
Gpr19	0.0586069	0	5.55556	0.117214	4.55317
Fam49a	0.0584458	0	9.70018	0.116892	5.2855
Tlcd2	0.0583137	0	0.0881834	0.116627	1.77245
Slc7a9	0.0583116	0	0	0.116623	0.0106135
Pcdh12	0.0582028	0	0	0.116406	0.0106135
Elmod3	0.0581349	0	4.05644	0.11627	2.49416
Ccdc28b	0.0580754	0	0.970018	0.116151	4.35152
Nek6	0.0579268	0	2.6455	0.115854	1.263
Gm29427	0.0579246	0	0	0.115849	0.838463
Fam234b	0.0577886	0	16.0494	0.115577	4.54256
Reps1	0.057723	0	5.64374	0.115446	8.31034
Bcl7c	0.0576166	0	2.91005	0.115233	3.789
Gm42439	0.0575824	0	0	0.115165	3.52367
Coq9	0.0573729	0	8.55379	0.114746	3.33263
Adamtsl5	0.057343	0	0.793651	0.114686	1.94226
Gm12108	0.0572237	0	0	0.114447	0.0106135
Dexi	0.0571212	0	5.37919	0.114242	4.30906
Cdh11	0.0570584	0	7.67196	0.114117	12.1418
C920021L13Rik	0.0570274	0	1.85185	0.114055	4.28784
Fbln1	0.0570187	0	10.0529	0.114037	1.61325
Xrcc6	0.0570099	0	1.67549	0.11402	4.45765
Gm14507	0.0570061	0	0	0.114012	0.24411
Lrrk2	0.0569538	0	2.99824	0.113908	3.37508
Txndc5	0.0568624	0	17.4603	0.113725	3.16281
Wls	0.0566406	0.113281	61.6402	0	13.702
Gm33050	0.0563534	0	0	0.112707	0.0106135
Nckap1	0.0562943	0	33.5979	0.112589	22.9463
Ino80dos	0.0562757	0	5.29101	0.112551	11.7597
Dnajb9	0.0561912	0	22.3104	0.112382	4.40459
Galnt6os	0.0561358	0	0	0.112272	0.0106135
Nudt12	0.0561278	0	2.55732	0.112256	0.785396
Epc1	0.0561025	0	5.11464	0.112205	13.6277
Nt5dc3	0.056074	0	1.49912	0.112148	3.99066
Hdac4	0.0560729	0	14.6384	0.112146	8.37402
Fasn	0.0560544	0	23.3686	0.112109	3.53428
Tgtp2	0.056027	0	0.0881834	0.112054	0.0106135
P4ha1	0.0559916	0	11.9929	0.111983	9.77499
Arglu1	0.0558511	0	9.25926	0.111702	24.9098
P3h3	0.0557737	0	4.2328	0.111547	3.66164
Gca	0.0557223	0	4.7619	0.111445	2.64275
Galnt1	0.0557024	0	14.9912	0.111405	10.7408
Islr2	0.0557006	0	0.0881834	0.111401	0.0106135
Satb1	0.0556964	0	2.73369	0.111393	4.5744
Mfsd2a	0.0555057	0	2.73369	0.111011	3.43876
Esrra	0.0554978	0	4.49735	0.110996	3.79962
Gm11734	0.055408	0	0	0.110816	0.350244
Tspan5	0.055297	0	18.8713	0.110594	25.1963
Fbxo30	0.0551744	0	4.40917	0.110349	2.72766
Apol10b	0.0551567	0	0	0.110313	0.0106135
Calr3	0.0549563	0	5.37919	0.109913	0.923371
Ddx5	0.0546321	0	39.3298	0.109264	27.9028
Fancd2os	0.0546127	0	0	0.109225	0.0106135
P2ry1	0.0545537	0	2.46914	0.109107	1.05073
Trim8	0.0544888	0	23.1041	0.108978	4.78667
Amt	0.0544874	0	5.20282	0.108975	3.20526
Ttc19	0.0544174	0	7.31922	0.108835	10.242
Prkab2	0.0543959	0	1.85185	0.108792	2.62152
CN725425	0.0543951	0	0	0.10879	0.106135
Lrfn4	0.0543912	0	3.96825	0.108782	2.0484
Dhrs1	0.0541256	0	8.99471	0.108251	2.86563
Efs	0.0540607	0	1.5873	0.108121	2.08024
Tlr2	0.0539699	0	1.14638	0.10794	0.424538
Gm42601	0.0537424	0	0	0.107485	0.0318404
Gstm1	0.0537109	0.107422	63.5802	0	6.95181
Pcyt2	0.0536419	0	6.79012	0.107284	20.6113
Tmem198b	0.0535807	0	0.0881834	0.107161	2.16515
Vwa8	0.0534915	0	18.9594	0.106983	16.4402
Txlnb	0.0534143	0	1.85185	0.106829	0.912757
Bmp7	0.0533861	0	0.440917	0.106772	1.45404
Rfxank	0.0533658	0	2.02822	0.106732	1.91042
Gm17250	0.0533072	0	0	0.106614	0.0106135
Oxct1	0.0532834	0	32.8924	0.106567	16.5888
Phgdh	0.0530941	0	16.2257	0.106188	4.13925
Dapk1	0.0529888	0	6.70194	0.105978	9.10635
Gm15841	0.0529809	0	0	0.105962	0.0106135
Csrp1	0.0529717	0	38.3598	0.105943	15.623
Il11ra1	0.0528187	0	13.5802	0.105637	4.66992
Kansl1	0.0527482	0	17.284	0.105496	31.2566
Il15	0.0527374	0	0.529101	0.105475	1.23116
Nudt3	0.0526008	0	15.3439	0.105202	4.17109
Chd1l	0.0521866	0	3.79189	0.104373	3.1522
Adra1b	0.0521326	0	1.23457	0.104265	1.9741
Sh3rf3	0.052124	0	1.14638	0.104248	4.8928
Nacc2	0.0519912	0	23.3686	0.103982	7.15347
Tesk2	0.0519895	0	3.52734	0.103979	10.7196
Cnot4	0.0518428	0	6.34921	0.103686	20.0594
Ltbp1	0.0517644	0	2.6455	0.103529	2.81257
Zfp385a	0.0511806	0	2.02822	0.102361	2.01656
Rfx3	0.0509752	0	15.5203	0.10195	22.2246
Npl	0.0509211	0	2.6455	0.101842	1.56018
Zfp354c	0.0507298	0	3.96825	0.10146	2.27128
Ralgapa1	0.0506427	0	17.8131	0.101285	24.464
Hoxb2	0.05055	0	0.176367	0.1011	1.67693
Hykk	0.0501427	0	1.32275	0.100285	1.23116
Tmem241	0.0500778	0	5.11464	0.100156	5.38102
Vsir	0.0498184	0	3.43915	0.0996367	2.53662
Stox2	0.0497632	0	21.5168	0.0995264	23.1055
Zfp438	0.0494895	0	4.40917	0.098979	7.22776
Ttc23	0.0493402	0	2.1164	0.0986804	7.4931
Ttc17	0.0493102	0	8.99471	0.0986205	11.4944
Arhgef9	0.0493074	0	9.96473	0.0986147	7.98132
Nox4	0.0492994	0	0.617284	0.0985989	1.36914
Trim12a	0.0492346	0	2.6455	0.0984691	3.55551
Bach2	0.0492021	0	11.0229	0.0984043	24.3367
3110082I17Rik	0.0491048	0	3.43915	0.0982097	4.90342
Mbd5	0.0488697	0	18.4303	0.0977394	26.3214
Srpk2	0.0487589	0	14.903	0.0975177	23.0206
Gpr146	0.0485859	0	6.70194	0.0971718	2.66398
Pth2r	0.0484004	0	0.26455	0.0968009	0.233496
Aldh6a1	0.0483407	0	28.2187	0.0966814	5.31734
Fbxw11	0.048294	0	14.8148	0.096588	11.4095
Ppil6	0.0482588	0	3.35097	0.0965176	7.47187
Drp2	0.0481373	0	10.7584	0.0962746	2.93993
Dcbld1	0.0479865	0	1.41093	0.095973	2.00594
Rsrp1	0.0479832	0	26.7196	0.0959663	33.4748
Tjp1	0.0478723	0	24.9559	0.0957447	26.3851
ENSMUSG00000076137	0.0478516	0.0957031	61.4638	0	0
Mat2a	0.0475831	0	44.709	0.0951663	19.7198
Smurf1	0.0474804	0	6.43739	0.0949609	7.18531
Slco1c1	0.0474326	0	0.705467	0.0948651	5.77372
Cdc42ep4	0.0473534	0	28.0423	0.0947068	3.04606
Pgbd1	0.0472925	0	0.970018	0.0945851	0.870304
Fam129a	0.0472885	0	0.793651	0.0945771	1.74061
Gm28539	0.0469642	0	0	0.0939284	3.37508
Prkaa2	0.0468369	0	3.88007	0.0936737	4.10741
Nfat5	0.0467642	0	25.7496	0.0935284	24.7718
2700081O15Rik	0.0466399	0	1.67549	0.0932797	1.54956
Slc12a4	0.0463155	0	7.14286	0.092631	2.55784
Vangl1	0.0462562	0	12.522	0.0925124	5.61452
4933423P22Rik	0.0462506	0	0	0.0925013	0.350244
Tekt4	0.0461271	0	0.0881834	0.0922541	0.350244
Zfp592	0.0461209	0	4.58554	0.0922418	6.28317
Alcam	0.0460993	0	27.6896	0.0921986	24.5914
E2f3	0.0459263	0	2.29277	0.0918526	3.24772
CYTB	0.0458984	0.0917969	61.9929	0	0
Fam92b	0.0455831	0	0	0.0911662	0.265336
Dnajc1	0.0455452	0	12.1693	0.0910904	22.1609
Lrrc25	0.0453655	0	0.793651	0.0907311	0.0318404
Hnmt	0.0452776	0	10.8466	0.0905553	3.32201
RP23-474J16.2	0.045148	0	0	0.0902959	1.41159
Tor3a	0.045083	0	5.55556	0.0901661	1.41159
Elp4	0.0450101	0	9.78836	0.0900201	15.3577
Gm26719	0.0447397	0	0	0.0894793	1.72999
Haao	0.0447021	0	0.617284	0.0894042	0.127361
Letm1	0.0446627	0	13.3157	0.0893254	4.04373
Stag1	0.0445479	0	30.0705	0.0890957	26.47
Yap1	0.0444992	0	9.70018	0.0889984	4.28784
Gata2	0.0444952	0	0.0881834	0.0889904	0.0530673
Strbp	0.0444371	0	10.9347	0.0888741	33.1989
Ddah1	0.0440316	0	24.515	0.0880633	12.3753
Krba1	0.0439851	0	2.82187	0.0879701	3.06729
Rnft2	0.0439233	0	2.91005	0.0878466	3.12036
Ccdc8	0.0439154	0	1.67549	0.0878308	0.329017
Pomt2	0.0439046	0	5.02646	0.0878091	2.08024
Echdc3	0.0437208	0	2.55732	0.0874416	0.817236
Nadk	0.0436559	0	11.1111	0.0873119	5.49777
Lpcat3	0.0435965	0	11.1111	0.087193	7.92825
Foxn2	0.043517	0	2.82187	0.0870339	6.72893
Ubb	0.0434397	0	65.6085	0.0868794	41.4986
Ptgr2	0.0434293	0	1.23457	0.0868586	3.30079
Atp5sl	0.0433348	0	0	0.0866695	2.58968
Loxl3	0.0433316	0	3.35097	0.0866632	2.50478
2010315B03Rik	0.0430948	0	1.41093	0.0861897	2.90809
Phyh	0.0430667	0	27.6014	0.0861334	4.88219
Car13	0.0429721	0	0.0881834	0.0859443	0.233496
Evc	0.0428986	0	3.1746	0.0857973	0.732329
Tor2a	0.042783	0	4.85009	0.085566	2.12269
Fam73b	0.0427478	0	0	0.0854956	5.60391
Ldb2	0.0426802	0	4.58554	0.0853604	11.8871
Tor1aip1	0.0426667	0	24.2504	0.0853334	11.2078
Nr6a1	0.042664	0	6.08466	0.085328	19.6137
Grin3a	0.042637	0	9.25926	0.085274	12.5663
Nf1	0.0425532	0	12.1693	0.0851064	25.0584
Mr1	0.0424235	0	3.1746	0.0848469	0.658034
Man2b2	0.0422937	0	6.17284	0.0845874	1.1038
Gpr156	0.0422289	0	0.705467	0.0844577	1.20993
Ptprt	0.0422207	0	17.9012	0.0844415	22.5005
Gprc5b	0.0421252	0	40.4762	0.0842503	13.1819
Pptc7	0.0421179	0	0.529101	0.0842358	5.23243
Gm15345	0.0420343	0	0	0.0840685	1.92104
Tnrc6a	0.0417775	0	12.6102	0.083555	20.07
1700030F04Rik	0.0417162	0	0	0.0834325	4.95648
Dlg4	0.0414619	0	7.76014	0.0829237	7.54617
Ctsl	0.0413667	0	39.1534	0.0827333	9.59457
F730035M05Rik	0.0413403	0	0	0.0826806	0.116748
Nppc	0.0413389	0.0625	30.776	0.0201778	1.67693
Ccdc121	0.0410139	0	0.0881834	0.0820279	0.0955211
Samd12	0.0410018	0	3.61552	0.0820035	17.958
Slc2a9	0.0408018	0	1.32275	0.0816035	1.07196
Fth1	0.0407801	0	65.5203	0.0815603	37.3275
Pbsn	0.0406876	0	0.26455	0.0813751	0.0849077
Fyn	0.0406342	0	30.8642	0.0812684	15.7185
Zdhhc21	0.0406237	0	7.67196	0.0812473	6.44237
Wwox	0.0403369	0	8.99471	0.0806738	31.9571
Glb1l2	0.0402524	0	1.67549	0.0805048	0.191042
Hivep1	0.0401531	0	4.40917	0.0803062	3.01422
Rita1	0.04015	0	1.5873	0.0803	2.25005
Prxl2a	0.0400391	0.0800781	57.231	0	0
Suclg2	0.0400234	0	16.1376	0.0800467	3.58735
1700017B05Rik	0.0399585	0	2.82187	0.079917	0.933984
Tspan12	0.0395044	0	6.34921	0.0790088	4.68053
Shd	0.0394849	0	3.35097	0.0789698	2.30312
Nxpe2	0.0394677	0	0	0.0789354	4.53195
Parvb	0.0393747	0	3.08642	0.0787494	4.94587
Gpt	0.0392882	0	0.881834	0.0785763	1.12503
mt-Nd1	0.0392287	0	0	0.0784574	20.813
Rasgrf1	0.039172	0	14.0212	0.0783439	12.9484
Slc29a3	0.0391152	0	5.20282	0.0782304	1.40098
Prkcd	0.0390503	0	3.26279	0.0781007	2.22883
Il17rd	0.0389855	0	12.3457	0.0779709	3.40692
Tmem176b	0.0389206	0	32.8924	0.0778412	4.97771
Irf2	0.0387692	0	6.26102	0.0775385	11.6748
L2hgdh	0.0387151	0	2.99824	0.0774301	1.3373
Cfap58	0.0386205	0	0.529101	0.0772411	0.0318404
Tom1	0.0384792	0	4.85009	0.0769583	7.80089
Mtfr1	0.0383081	0	3.35097	0.0766161	1.18871
Lifr	0.0382579	0	8.81834	0.0765158	6.95181
Herc6	0.0381422	0	1.85185	0.0762844	2.89747
Tmed5	0.0381344	0	17.4603	0.0762689	6.24071
Mad1l1	0.0381206	0	2.91005	0.0762411	36.1601
Gm29642	0.038118	0	0	0.076236	2.4411
Nusap1	0.0380633	0	0.970018	0.0761265	1.41159
Syt12	0.0380125	0	2.99824	0.0760249	4.04373
Nsd1	0.0380098	0	14.3739	0.0760195	27.2766
Mark3	0.0377881	0	8.99471	0.0755762	19.1997
Kantr	0.0377335	0	8.55379	0.0754671	5.65697
Mapkapk3	0.0376881	0	0.881834	0.0753762	1.08257
Cox11	0.0376014	0	1.23457	0.0752029	3.45999
Wwc2	0.0375611	0	8.37743	0.0751222	9.76438
Ampd3	0.0374935	0	6.26102	0.074987	4.78667
Ttc28	0.0374557	0	13.4921	0.0749113	19.3483
Phxr4	0.0374286	0	2.73369	0.0748573	5.74188
Hhip	0.0373861	0	0.793651	0.0747721	3.19465
Pias1	0.037234	0	15.6966	0.0744681	18.4143
Nr1d1	0.0371692	0	17.0194	0.0743383	3.52367
ENSMUSG00000101111	0.0371094	0.0742188	59.1711	0	0
Fzd7	0.0370394	0	3.88007	0.0740789	0.413925
C130083M11Rik	0.0369887	0	0	0.0739774	0.0636807
Myh14	0.036967	0	6.87831	0.073934	9.17003
Jmjd1c	0.0369016	0	15.6085	0.0738032	25.2388
B9d1os	0.0368799	0	0	0.0737598	0.0636807
Aldh2	0.0366854	0	30.2469	0.0733707	8.07684
Megf10	0.0366231	0	26.1905	0.0732462	13.1288
Ctso	0.0365854	0	22.9277	0.0731707	4.92464
Efr3b	0.0365003	0	2.6455	0.0730005	13.7869
Dock1	0.0364583	0	11.552	0.0729167	26.1197
Dchs1	0.0363908	0	11.3757	0.0727815	1.95288
Jak1	0.0363718	0	23.2804	0.0727437	8.31034
Ncor2	0.0363259	0	8.20106	0.0726518	6.56973
Acaa2	0.0361962	0	7.76014	0.0723923	1.80429
Vim	0.0361328	0.0722656	60.4056	0	1.29484
Cyr61	0.0359367	0	0	0.0718734	0.530673
Zfp961	0.0359204	0	1.94004	0.0718407	5.00955
Ehhadh	0.0358718	0	1.23457	0.0717436	2.993
Rbm26	0.0356826	0	10.9347	0.0713652	22.8508
Disp1	0.0356124	0	2.82187	0.0712247	2.13331
Mocs2	0.0355475	0	6.96649	0.071095	4.22416
Ubn2	0.035461	0	20.7231	0.070922	26.5973
Mrps23	0.0354177	0	6.26102	0.0708355	2.08024
Col16a1	0.0353336	0	0.617284	0.0706671	2.11208
Gm26615	0.0352068	0	0	0.0704135	0.466992
Oplah	0.0351364	0	10.6702	0.0702728	3.27956
Szrd1	0.0350934	0	9.34744	0.0701868	4.47888
Ptprm	0.0349069	0	13.2275	0.0698138	25.7589
Arhgef40	0.0348988	0	4.2328	0.0697976	4.82912
Mylip	0.0348204	0	4.67372	0.0696408	11.5156
Nr6a1os	0.0347691	0	0	0.0695381	3.74655
Park2	0.0346853	0	0	0.0693706	31.8828
Emp2	0.0346393	0	14.7266	0.0692787	3.06729
Tef	0.0344934	0	14.4621	0.0689868	11.6536
Crebbp	0.0344637	0	13.933	0.0689273	21.2057
Blcap	0.0344432	0	9.52381	0.0688864	5.9117
Gm684	0.034315	0	0	0.06863	0.27595
Mib1	0.0340934	0	9.52381	0.0681867	11.5474
Mocos	0.0339907	0	0.793651	0.0679813	0.466992
F5	0.0338997	0	8.11287	0.0677994	0.721715
Calm2	0.0336879	0	29.0123	0.0673759	33.1883
Fbxo44	0.0334968	0	17.284	0.0669936	5.00955
Dag1	0.0334069	0	40.5644	0.0668137	8.44831
Gm11149	0.0332703	0	0.352734	0.0665406	1.96349
Efnb3	0.0332031	0.0664062	41.6226	0	3.04606
Scaper	0.0331339	0	11.8166	0.0662677	19.6774
Fdft1	0.0330983	0	16.5785	0.0661967	7.5674
Gramd1a	0.0330176	0	2.38095	0.0660353	6.83507
D230017M19Rik	0.0328879	0	0.793651	0.0657758	2.58968
Lrba	0.0328014	0	18.4303	0.0656028	20.07
Chd4	0.0326933	0	25.3968	0.0653866	13.5109
Npepps	0.0325798	0	26.1023	0.0651596	19.4863
Eaf2	0.0325738	0	0.352734	0.0651476	4.79728
BB365896	0.0324927	0	0	0.0649853	0.159202
Rhobtb2	0.032369	0	6.26102	0.0647379	4.31968
Sapcd2	0.0323107	0	0	0.0646214	0.0636807
Smarcd3	0.0322392	0	1.23457	0.0644785	4.11802
Npepl1	0.0321095	0	2.1164	0.064219	2.993
Mettl7a1	0.0320667	0	10.1411	0.0641334	6.44237
Mmgt1	0.0320446	0	7.40741	0.0640893	0.817236
Smarca2	0.0320257	0	17.7249	0.0640514	17.6077
Ranbp3l	0.0319843	0	0.705467	0.0639687	1.77245
Pygo1	0.0319149	0	6.52557	0.0638298	1.98472
Tada2b	0.03185	0	0.529101	0.0637001	0.488219
Cklf	0.0317852	0	2.6455	0.0635703	3.81023
Plekhh3	0.0315906	0	3.88007	0.0631811	1.76183
Vta1	0.031539	0	11.9048	0.0630781	7.04734
Suclg1	0.0315338	0	24.2504	0.0630676	9.21248
Zfp936	0.0315281	0	0.881834	0.0630563	0.923371
Gnas	0.0314716	0	12.6984	0.0629433	32.3392
Kif1c	0.0313311	0	6.34921	0.0626622	3.2371
Nrros	0.0312662	0	2.99824	0.0625324	1.41159
Srgap3	0.03125	0	17.4603	0.0625	19.1255
Slc22a17	0.03125	0.0625	53.1746	0	14.3812
Tmem55a	0.0311217	0	0	0.0622433	7.66292
Arhgef18	0.0310067	0	5.55556	0.0620135	4.69115
Atp6v0b	0.0309176	0	20.4586	0.0618351	24.3473
Sobp	0.0308067	0	11.9929	0.0616135	16.3129
Gsap	0.0307473	0	8.64198	0.0614946	6.39992
Flt3l	0.0306824	0	0.440917	0.0613648	2.17576
Itpr1	0.0305581	0	10.1411	0.0611162	13.0227
Ap3b2	0.0305262	0	4.49735	0.0610524	5.6782
Lynx1	0.0303722	0	1.94004	0.0607443	4.64869
Gm32569	0.0303345	0	0	0.0606689	1.12503
ND1	0.0302734	0.0605469	53.7919	0	0
Snhg11	0.0302527	0	8.11287	0.0605053	42.146
Nr1d2	0.0302283	0	15.6085	0.0604567	7.4931
Nedd4l	0.0301418	0	18.5185	0.0602837	16.5145
Arl6ip6	0.0300337	0	4.14462	0.0600675	2.66398
Rfx7	0.030031	0	8.46561	0.0600621	16.4402
A530083I20Rik	0.0299689	0	0	0.0599377	0.413925
Cpped1	0.0297946	0	6.43739	0.0595892	6.31501
Angptl4	0.0297743	0	1.49912	0.0595485	0.636807
Fbxl17	0.0296986	0	9.43563	0.0593972	23.2859
Pacsin3	0.0296596	0	4.14462	0.0593191	2.84441
Gpc4	0.0296445	0	1.67549	0.0592891	2.26067
Mlxipl	0.0295148	0	1.41093	0.0590296	1.34791
Tmed7	0.0294844	0	29.4533	0.0589688	4.48949
Fibp	0.0293202	0	4.05644	0.0586404	4.52133
Dennd4c	0.0292823	0	4.58554	0.0585647	12.4071
Abcb1b	0.0292553	0	1.5873	0.0585106	1.48588
Cdk14	0.0290337	0	8.55379	0.0580674	17.8731
Cd302	0.0288661	0	10.2293	0.0577322	3.59796
Por	0.0288337	0	29.3651	0.0576674	10.9531
Fam20c	0.0286715	0	18.5185	0.057343	4.13925
Dennd1b	0.0286256	0	7.49559	0.0572511	8.68181
Azin1	0.0285215	0	8.90653	0.057043	4.01189
Serhl	0.028412	0	0.0881834	0.0568241	1.82551
Abhd11	0.0283472	0	1.67549	0.0566943	3.05668
Sulf1	0.0283203	0.0566406	53.8801	0	8.8304
Klkb1	0.0282855	0	0.176367	0.0565709	0.0742942
Idh3b	0.0282823	0	21.8695	0.0565646	6.44237
1110051M20Rik	0.028258	0	16.7549	0.056516	19.55
Hadhb	0.0281526	0	32.1869	0.0563051	5.82679
Cox8a	0.0281472	0	38.8889	0.0562943	20.7281
Mex3d	0.0280228	0	2.82187	0.0560457	0.424538
Gucd1	0.027958	0	2.55732	0.0559159	3.85269
Elovl5	0.0277925	0	37.7425	0.0555849	8.64997
Pcgf5	0.0277634	0	10.8466	0.0555267	5.02017
Astn2	0.0277039	0	23.8977	0.0554078	29.0703
Gm16337	0.0276985	0	0	0.055397	0.604967
Cacna2d2	0.0275688	0	8.46561	0.0551375	4.90342
Arnt2	0.0275103	0	16.6667	0.0550206	12.4814
Hspa8	0.0274823	0	58.2011	0.0549645	35.0775
Slc18b1	0.0273742	0	4.14462	0.0547483	1.94226
Zfand4	0.0273618	0	1.76367	0.0547236	2.66398
Kctd12b	0.0272867	0	1.94004	0.0545733	0.658034
F420014N23Rik	0.0272444	0	0.970018	0.0544888	0.636807
Ggnbp1	0.0271913	0	0.881834	0.0543827	5.4447
Sox8	0.0269945	0	1.14638	0.053989	8.92592
Susd6	0.0268444	0	11.7284	0.0536888	13.1076
Parva	0.0267903	0	10.582	0.0535807	4.66992
Zcchc24	0.0267576	0	17.1958	0.0535151	8.51199
Degs2	0.0266536	0	0	0.0533072	0.0636807
5031425E22Rik	0.026612	0	10.582	0.0532239	13.6807
4932443I19Rik	0.0265448	0	0	0.0530896	2.28189
Ltbp3	0.0265309	0	7.14286	0.0530618	3.10974
Gm13563	0.0263363	0	0	0.0526725	0.955211
Hnrnpa2b1	0.0262633	0	37.2134	0.0525266	19.4651
Mamdc2	0.0262185	0	9.34744	0.0524369	1.14625
Rhbdf1	0.0261417	0	2.46914	0.0522833	1.72999
Lgr4	0.02603	0	12.2575	0.0520599	6.58034
Fbxo15	0.0260009	0	0.617284	0.0520017	0.106135
Thnsl2	0.0259471	0	2.73369	0.0518941	0.711102
Ppp1r9a	0.02582	0	16.843	0.0516401	19.8366
Gm26954	0.0257909	0	0	0.0515818	1.3373
Ppp1r36	0.0257833	0	0.793651	0.0515666	0.360858
Prdm5	0.0256227	0	5.46737	0.0512455	7.98132
Lncpint	0.0255984	0	14.0212	0.0511968	23.6786
St6galnac4	0.0254281	0	2.99824	0.0508563	1.15687
Eef2k	0.0253633	0	2.6455	0.0507265	6.73955
Dnajc27	0.0252984	0	4.58554	0.0505968	4.23477
Lamp2	0.0252443	0	43.2981	0.0504887	11.0698
Zfp516	0.0249741	0	5.55556	0.0499481	4.08618
Gm20732	0.0248443	0	0	0.0496886	6.47421
Gm20521	0.0247794	0	0	0.0495589	3.94821
Abhd6	0.0247146	0	15.5203	0.0494292	7.3339
Obsl1	0.0246497	0	1.85185	0.0492994	0.764169
Galnt16	0.024567	0	21.3404	0.0491339	8.61813
Hoxb4	0.02452	0	5.90829	0.04904	2.00594
Gpr63	0.0245153	0	0	0.0490306	1.11441
Stk40	0.0244551	0	3.61552	0.0489102	2.79134
ENSMUSG00000112926	0.0244141	0.0488281	53.2628	0	0
Zfp277	0.0241308	0	6.61376	0.0482615	7.50371
Ephx1	0.0240659	0	11.8166	0.0481318	2.02717
Lingo1	0.0240245	0	4.93827	0.0480491	1.52834
Cry1	0.0240034	0	5.29101	0.0480068	1.4965
Kansl3	0.0239362	0	7.93651	0.0478723	7.15347
Wdr38	0.0238795	0	0.352734	0.0477589	0.148588
Nfkbiz	0.0236767	0	1.41093	0.0473534	1.17809
Kdm3b	0.0236767	0	5.55556	0.0473534	11.8128
Rnf115	0.0236118	0	10.0529	0.0472237	7.69476
Plekhm2	0.0234172	0	5.02646	0.0468345	10.7939
Tns4	0.0232875	0	0	0.046575	0.0849077
Gm16124	0.0230929	0	0	0.0461858	3.41753
Ddx17	0.0230496	0	24.3386	0.0460993	16.8329
Sdc3	0.0229632	0	13.1393	0.0459263	5.71004
Mllt10	0.0229388	0	10.582	0.0458777	22.9357
Mmp28	0.0228983	0	0.352734	0.0457966	1.41159
Gpr173	0.0228334	0	2.38095	0.0456668	1.84674
Hectd2	0.0227686	0	1.41093	0.0455371	1.52834
Marcks	0.0227037	0	40.1235	0.0454074	8.25727
Ednra	0.0226388	0	4.2328	0.0452776	1.95288
Arhgap27os1	0.022574	0	0	0.045148	0.0212269
Trp53rka	0.0225739	0	2.29277	0.0451479	0.902144
Oscp1	0.0224442	0	5.46737	0.0448884	5.84802
Ccnd3	0.0223956	0	6.79012	0.0447911	13.0015
Rcbtb2	0.0223793	0	3.61552	0.0447587	2.48355
2900089D17Rik	0.0223145	0	0	0.044629	0.636807
Hibch	0.0222676	0	6.34921	0.0445352	4.75483
Slc16a6	0.0222496	0	4.67372	0.0444992	2.25005
Fuca2	0.0221847	0	8.46561	0.0443695	2.46232
Arhgap21	0.0221631	0	17.7249	0.0443262	17.5228
Arl13a	0.0220527	0	0	0.0441055	0.5519
Myh6	0.0220523	0	1.94004	0.0441046	1.4222
Sun2	0.0219901	0	7.84832	0.0439803	2.16515
Iqsec1	0.0218288	0	15.7848	0.0436577	13.3623
Tpp1	0.0217955	0	36.4198	0.0435911	3.50244
Efhd1	0.0217503	0	21.9577	0.0435007	2.69582
Gabrd	0.0217307	0	5.46737	0.0434613	0.520059
Acyp2	0.021609	0	20.4586	0.0432181	19.1891
Otud1	0.0215361	0	2.55732	0.0430721	0.636807
Klf7	0.0214982	0	17.1958	0.0429965	17.5547
Ube2f	0.0214712	0	4.67372	0.0429424	3.83146
Map3k14	0.0214063	0	1.14638	0.0428127	4.90342
Sesn3	0.0213685	0	16.5785	0.042737	9.52027
Golph3	0.0212766	0	13.2275	0.0425532	2.40925
Fam19a5	0.0212345	0	0	0.0424691	8.89408
Acbd4	0.0212117	0	2.91005	0.0424235	4.63808
Slc29a1	0.0211469	0	5.64374	0.0422937	1.99533
Cdk2ap1	0.021082	0	15.3439	0.042164	3.51305
Med15	0.0210333	0	3.88007	0.0420667	9.88113
Ikbip	0.0210171	0	8.81834	0.0420343	3.53428
Atxn7	0.0209523	0	9.34744	0.0419045	8.24666
Ppp1r1a	0.0208874	0	7.14286	0.0417748	1.92104
Nedd9	0.0207577	0	3.96825	0.0415153	5.47654
Ptk2	0.0207225	0	24.6032	0.041445	27.2872
Rit1	0.0206928	0	7.05467	0.0413856	3.17342
Itih5	0.0205078	0.0410156	57.9365	0	4.23477
Aak1	0.0203901	0	9.61199	0.0407801	16.0688
Snx25	0.0203684	0	3.96825	0.0407369	6.84568
Mdh1	0.0202793	0	43.5626	0.0405585	21.1314
Mtr	0.0202387	0	3.35097	0.0404774	2.31373
Aifm2	0.0201738	0	2.55732	0.0403477	1.31607
Slc16a9	0.020109	0	2.20459	0.040218	2.15453
Selk	0.0200576	0	0	0.0401152	18.6478
Crot	0.0200441	0	18.0776	0.0400882	3.04606
Ppp1r9b	0.0199144	0	10.9347	0.0398287	4.38336
Ddt	0.0198495	0	10.2293	0.039699	3.00361
Pou2f1	0.0198009	0	11.6402	0.0396017	12.3435
Aph1a	0.0197846	0	11.9048	0.0395693	3.82084
Luzp1	0.0197252	0	4.85009	0.0394504	13.426
Gm29107	0.0197198	0	0	0.0394395	0.5519
Hist2h2be	0.01959	0	0	0.0391801	0.562513
Tmsb4x	0.0195312	0.0390625	49.5591	0	17.7457
Ube2cbp	0.0194603	0	1.14638	0.0389206	1.16748
Sin3b	0.0193954	0	8.46561	0.0387909	5.79495
Gm16008	0.0193642	0	0	0.0387284	0.668648
Lrp10	0.0193306	0	25.5732	0.0386611	2.95054
Hoxc4	0.0192008	0	15.3439	0.0384017	4.50011
Snx21	0.0190711	0	3.79189	0.0381422	5.17937
Egln3	0.0190062	0	2.02822	0.0380125	0.679261
Ap3s1	0.0189414	0	5.11464	0.0378827	6.37869
Crtc3	0.0188684	0	8.64198	0.0377368	9.92358
Eda	0.0188116	0	0.793651	0.0376232	6.43176
Lacc1	0.0187468	0	1.23457	0.0374935	1.08257
Ppm1e	0.0187278	0	9.61199	0.0374557	14.5829
Gstm5	0.0187046	0	22.0459	0.0374093	7.07918
Gmpr2	0.0186819	0	0.881834	0.0373638	5.05201
Ptchd2	0.0186658	0	0	0.0373316	1.16748
Xpnpep1	0.018617	0	8.81834	0.037234	5.15814
mt-Cytb	0.018617	0	0	0.037234	19.9002
Calm1	0.0185547	0.0371094	53.0864	0	22.5324
Fam186a	0.0185223	0	0.440917	0.0370445	0.689875
Serinc1	0.0185062	0	51.94	0.0370124	17.2575
Ccdc96	0.0183856	0	1.32275	0.0367711	0.137975
F830045P16Rik	0.0182278	0	0.0881834	0.0364556	0.435152
Nfs1	0.0181629	0	9.17108	0.0363259	3.98005
Ccdc6	0.0180981	0	6.26102	0.0361962	3.22649
Gm9968	0.0180332	0	0	0.0360664	0.477606
Cc2d2a	0.0179683	0	6.61376	0.0359367	6.42114
Kcnq3	0.0179677	0	3.26279	0.0359354	29.6115
Zfp395	0.0177737	0	3.61552	0.0355475	4.14986
Syde2	0.0175261	0	1.76367	0.0350522	1.00828
Ncor1	0.017398	0	24.7795	0.0347961	22.7446
Clasp2	0.0172872	0	14.7266	0.0345745	34.3982
Fmn1	0.0172799	0	2.55732	0.0345598	9.05328
Cyp4f13	0.0172478	0	4.32099	0.0344956	4.52133
Cpne2	0.0171251	0	12.963	0.0342501	4.03311
Kdm3a	0.0170602	0	10.1411	0.0341204	8.32095
Pnn	0.0169467	0	7.76014	0.0338934	12.1206
4930579H20Rik	0.0169305	0	1.76367	0.0338609	0.838463
Fgfr2	0.016844	0	37.5661	0.0336879	35.3959
Scn8a	0.0168305	0	7.23104	0.0336609	10.104
Stard8	0.0168007	0	2.20459	0.0336015	3.67226
Usp2	0.0167359	0	21.6049	0.0334717	6.01783
Nnt	0.016671	0	6.17284	0.033342	5.23243
Sirt3	0.0166155	0	2.91005	0.0332311	5.90108
[truncated: 280 more rows]

## Sheet: Endothelial_cells
gene	combined_expr_specificity	cellex_score_zhang	expr_proportion_zhang	cellex_score_ludwig	expr_proportion_ludwig
Sox17	0.984819	0.980706	36.2069	0.988932	28.5185
Robo4	0.981919	0.98725	32.7586	0.976588	23.8272
Degs2	0.959966	0.93089	13.7931	0.989043	28.2716
Sox7	0.951786	0.9369	12.069	0.966672	8.64198
Gimap6	0.936757	0.95326	17.2414	0.920254	29.0123
AU021092	0.93293	0.88334	6.89655	0.98252	17.5309
Tcf15	0.919247	0.899914	8.62069	0.93858	5.55556
Gimap8	0.915748	0.858683	6.89655	0.972812	6.91358
Tbx1	0.911177	0.841268	6.89655	0.981085	5.80247
Sox18	0.903665	0.826494	44.8276	0.980836	17.9012
Adcy4	0.894291	0.804786	6.89655	0.983797	13.9506
Tie1	0.885715	0.780755	25.8621	0.990676	31.358
Cd93	0.88454	0.818334	51.7241	0.950747	28.642
Ly6a	0.880375	0.83532	77.5862	0.92543	73.0864
Unc45b	0.875727	0.863377	6.89655	0.888077	10.6173
Ly6c1	0.874766	0.830257	82.7586	0.919276	82.2222
Pmaip1	0.873477	0.80777	5.17241	0.939184	4.19753
Slco1a4	0.868195	0.809717	63.7931	0.926673	91.7284
Cldn5	0.865703	0.813124	55.1724	0.918282	88.0247
Zfp366	0.863202	0.760292	29.3103	0.966112	34.0741
Slc22a8	0.8616	0.786001	34.4828	0.937199	45.1852
Xdh	0.851826	0.796458	27.5862	0.907193	33.3333
Slfn5	0.851228	0.788876	39.6552	0.91358	14.8148
Car4	0.850803	0.742679	39.6552	0.958928	68.1481
Foxf2	0.848268	0.729282	29.3103	0.967255	17.7778
Pcdh12	0.843119	0.743078	3.44828	0.943159	2.46914
Esam	0.842602	0.748109	58.6207	0.937095	51.1111
Tinagl1	0.840065	0.746076	46.5517	0.934054	27.7778
Nostrin	0.831513	0.733199	32.7586	0.929827	56.2963
Scgb3a1	0.829275	0.691464	12.069	0.967086	3.08642
Higd1b	0.827326	0.722394	25.8621	0.932257	24.4444
AW112010	0.827016	0.724041	25.8621	0.929991	26.4198
Slfn2	0.825076	0.841562	6.89655	0.80859	6.66667
Gja4	0.820193	0.716019	20.6897	0.924368	8.88889
Foxq1	0.81922	0.707429	15.5172	0.931011	27.6543
Gimap5	0.814445	0.710727	3.44828	0.918163	3.33333
Kcnj8	0.813054	0.683634	24.1379	0.942473	17.5309
Gata2	0.809697	0.634074	32.7586	0.985319	16.9136
Ifitm1	0.806751	0.703885	20.6897	0.909617	16.2963
Slc38a5	0.805127	0.674279	29.3103	0.935975	26.9136
Saa1	0.802461	0.690866	3.44828	0.914055	2.34568
Ripply3	0.799501	0.686413	10.3448	0.91259	1.97531
Hlx	0.798975	0.70349	3.44828	0.894461	4.44444
Cd300lg	0.796302	0.735262	13.7931	0.857341	4.07407
Kif26a	0.79595	0.675964	22.4138	0.915937	15.0617
Emcn	0.794931	0.644154	70.6897	0.945709	56.1728
Cdh5	0.791776	0.652017	55.1724	0.931536	37.037
Edn1	0.789368	0.676554	10.3448	0.902183	9.38272
Ushbp1	0.78795	0.62531	24.1379	0.95059	37.284
Srms	0.787585	0.789867	5.17241	0.785303	2.22222
Adgrl4	0.78653	0.644965	56.8966	0.928095	78.8889
Ptprb	0.786386	0.63428	75.8621	0.938492	60.1235
Cav1	0.785631	0.753428	37.931	0.817835	30.7407
C130074G19Rik	0.783996	0.622489	31.0345	0.945503	24.9383
Flt1	0.783925	0.645048	82.7586	0.922801	94.0741
Rgs5	0.782909	0.648184	86.2069	0.917634	76.6667
Lef1	0.781101	0.60394	34.4828	0.958261	66.7901
Flt4	0.779968	0.637166	17.2414	0.92277	9.75309
She	0.77959	0.615134	17.2414	0.944046	15.1852
Klf2	0.778612	0.624211	60.3448	0.933014	42.716
Clic5	0.776934	0.599165	31.0345	0.954703	28.5185
Car5a	0.776594	0.65381	6.89655	0.899379	11.358
Cxcl12	0.774252	0.629456	56.8966	0.919048	64.9383
Acvrl1	0.772264	0.638503	36.2069	0.906026	38.8889
Slc40a1	0.770768	0.625575	25.8621	0.915961	35.9259
Rasip1	0.77062	0.591354	27.5862	0.949885	27.5309
Slc52a3	0.770189	0.581397	10.3448	0.958982	7.90123
Abcb1a	0.769954	0.629566	60.3448	0.910342	67.7778
Gm4070	0.76898	0.766579	18.9655	0.771381	4.5679
Kdr	0.766437	0.595606	56.8966	0.937268	36.9136
Paqr5	0.765882	0.596903	31.0345	0.934861	45.8025
Ctla2a	0.765719	0.623488	41.3793	0.907951	40.6173
Apold1	0.76356	0.626875	15.5172	0.900245	9.87654
Ccm2l	0.763536	0.555898	8.62069	0.971175	11.9753
Tbx3	0.76351	0.675643	13.7931	0.851377	16.9136
Slc19a3	0.762912	0.596245	12.069	0.92958	18.1481
Ndufa4l2	0.762361	0.573835	17.2414	0.950886	29.1358
Egfl7	0.761794	0.607753	55.1724	0.915834	0.864198
Cd34	0.760415	0.617013	51.7241	0.903817	41.358
Akr1c14	0.760371	0.600351	13.7931	0.920391	2.83951
Dll4	0.7599	0.538383	13.7931	0.981417	9.38272
Sema7a	0.759106	0.655921	67.2414	0.86229	32.8395
Grap	0.758667	0.584271	8.62069	0.933062	24.321
Pglyrp1	0.757976	0.605897	27.5862	0.910056	68.8889
Thbd	0.756464	0.620342	37.931	0.892587	22.5926
Tbxa2r	0.756131	0.601896	17.2414	0.910367	9.1358
Klf4	0.75444	0.550167	37.931	0.958712	19.5062
Tmem204	0.753435	0.619533	41.3793	0.887337	36.5432
Clec14a	0.753098	0.593954	18.9655	0.912243	16.9136
BC028528	0.751514	0.633234	18.9655	0.869795	42.716
Slco1c1	0.750861	0.612472	43.1034	0.88925	77.7778
Tgm2	0.749734	0.647084	55.1724	0.852384	21.4815
Ramp2	0.749132	0.62158	63.7931	0.876684	55.8025
Des	0.748923	0.576758	6.89655	0.921088	5.67901
Rem1	0.748612	0.561911	5.17241	0.935312	6.2963
Ccrl2	0.748124	0.541292	10.3448	0.954955	7.90123
Myl9	0.747935	0.580963	43.1034	0.914907	31.1111
Gper1	0.747418	0.586828	13.7931	0.908008	9.87654
Foxc1	0.747087	0.68577	29.3103	0.808405	19.1358
Stra6	0.745085	0.573841	18.9655	0.916329	10.7407
Epha2	0.743691	0.592321	8.62069	0.895061	5.92593
Aspn	0.740487	0.536054	10.3448	0.944919	8.88889
Lmo2	0.738681	0.636437	27.5862	0.840925	31.9753
Gkn3	0.734251	0.519562	3.44828	0.948941	5.06173
Itm2a	0.733126	0.565377	79.3103	0.900875	82.963
Itga1	0.732991	0.621918	37.931	0.844065	35.0617
Eng	0.732481	0.59128	50	0.873682	57.4074
Cd248	0.732208	0.592483	8.62069	0.871932	7.90123
Net1	0.730541	0.593329	29.3103	0.867754	22.3457
Hspa12b	0.730173	0.596198	18.9655	0.864149	36.6667
Slc9a3r2	0.730057	0.603392	56.8966	0.856722	48.0247
Prss23	0.72902	0.598207	20.6897	0.859834	14.8148
Pdgfb	0.728966	0.613972	39.6552	0.84396	32.0988
Pecam1	0.728673	0.559814	46.5517	0.897532	55.1852
Gpr4	0.728644	0.552305	18.9655	0.904983	12.8395
Clec2d	0.726868	0.609478	39.6552	0.844257	27.037
Vwf	0.726561	0.584218	25.8621	0.868903	10.8642
Tmem88	0.72652	0.587005	17.2414	0.866035	5.92593
Thsd1	0.726214	0.580956	15.5172	0.871472	37.4074
Ly6c2	0.726052	0.841057	79.3103	0.611048	0.493827
Wfdc1	0.725843	0.515115	36.2069	0.936571	32.3457
Fxyd5	0.725653	0.597321	22.4138	0.853985	35.3086
Cyyr1	0.725155	0.530413	34.4828	0.919896	68.5185
Slc39a8	0.724574	0.564157	20.6897	0.88499	18.5185
Sema3g	0.723991	0.510966	6.89655	0.937016	7.28395
Cyp2e1	0.722204	0.486495	10.3448	0.957912	2.34568
Ecscr	0.721428	0.602045	10.3448	0.840812	9.38272
1700018A04Rik	0.720934	0.521087	1.72414	0.920781	4.5679
Notch4	0.719453	0.524614	32.7586	0.914291	15.4321
Igfbp7	0.718291	0.576548	89.6552	0.860033	62.0988
Apol10b	0.717427	0.501229	5.17241	0.933624	1.85185
Kank3	0.715583	0.559231	31.0345	0.871936	57.4074
Prkch	0.715501	0.590084	17.2414	0.840918	40.1235
Tal1	0.714066	0.704516	3.44828	0.723616	9.1358
Pkn3	0.713671	0.557375	8.62069	0.869968	3.95062
Tgtp2	0.713652	0.504035	10.3448	0.923268	1.60494
Ace2	0.713138	0.490043	6.89655	0.936234	8.88889
Podxl	0.710793	0.538138	58.6207	0.883449	49.2593
Sema3c	0.710189	0.539026	27.5862	0.881352	66.4198
Adgrf5	0.706935	0.501106	67.2414	0.912764	52.4691
Slc35f2	0.704876	0.570148	10.3448	0.839605	12.8395
Vtn	0.702083	0.616951	55.1724	0.787215	46.0494
Abcc9	0.701811	0.5578	36.2069	0.845823	24.1975
Icam2	0.698616	0.426861	10.3448	0.970372	31.6049
Acer2	0.695799	0.499023	29.3103	0.892575	30
Osmr	0.695408	0.562872	17.2414	0.827943	20.4938
Ly6e	0.694539	0.576819	86.2069	0.812259	71.4815
Bcam	0.690621	0.539473	46.5517	0.841768	31.7284
Kcp	0.690203	0.624512	3.44828	0.755895	7.16049
Fam167b	0.689769	0.66564	6.89655	0.713898	0.617284
Iigp1	0.689217	0.471464	8.62069	0.90697	10.8642
Scarf1	0.688624	0.497395	10.3448	0.879853	12.4691
Lsr	0.687378	0.448594	10.3448	0.926163	38.0247
St6galnac2	0.687076	0.512601	15.5172	0.86155	16.9136
Mmrn2	0.686124	0.597512	32.7586	0.774737	16.6667
Hbb-bt	0.685793	0.581935	12.069	0.789651	7.65432
Map3k6	0.68578	0.539711	8.62069	0.831848	6.04938
Nos3	0.684152	0.458011	12.069	0.910294	20.7407
Sgpp2	0.683463	0.518197	15.5172	0.848729	26.5432
Prom1	0.683371	0.476008	31.0345	0.890734	45.9259
Ppbp	0.681083	0.496999	1.72414	0.865168	0.37037
Arap3	0.680229	0.583685	13.7931	0.776773	24.321
Hic1	0.679198	0.482947	12.069	0.875449	6.79012
Proser2	0.67717	0.556276	15.5172	0.798063	13.8272
Adgre5	0.677157	0.472955	37.931	0.88136	26.1728
Afap1l1	0.676897	0.618697	29.3103	0.735097	37.7778
Aplnr	0.676464	0.492111	12.069	0.860818	1.35802
Ceacam1	0.676129	0.565034	25.8621	0.787224	10.1235
Gjc1	0.673379	0.456207	25.8621	0.89055	26.9136
Notum	0.670846	0.411592	5.17241	0.9301	10.8642
Sp100	0.670376	0.610023	24.1379	0.730729	35.4321
Atp10a	0.667423	0.436363	25.8621	0.898483	61.2346
Rasgrp2	0.666013	0.555457	22.4138	0.776568	31.4815
St8sia4	0.665818	0.507636	24.1379	0.823999	45.679
Smco4	0.664624	0.463236	13.7931	0.866011	20.1235
Ltbp4	0.664427	0.499671	43.1034	0.829182	47.6543
Ets1	0.663663	0.514475	46.5517	0.812852	53.2099
Cav2	0.661306	0.499421	41.3793	0.823191	29.5062
Cbfa2t3	0.659314	0.497838	17.2414	0.820791	17.7778
Rundc3b	0.657837	0.494015	32.7586	0.821658	77.7778
Tmem252	0.65777	0.343743	20.6897	0.971797	11.1111
Smagp	0.657653	0.486934	13.7931	0.828371	11.1111
Trim47	0.656251	0.539199	17.2414	0.773302	17.1605
Esm1	0.653568	0.700567	12.069	0.60657	1.23457
Abcg2	0.653446	0.490611	48.2759	0.81628	69.3827
Tnfsf10	0.649884	0.374805	8.62069	0.924962	14.1975
Gng11	0.649132	0.485638	43.1034	0.812626	51.358
Tecrl	0.64807	0.315859	5.17241	0.980281	10.9877
Tpm4	0.645879	0.4964	60.3448	0.795357	41.4815
Lims2	0.645303	0.585641	37.931	0.704966	32.0988
Hmcn1	0.644737	0.424924	17.2414	0.86455	66.2963
Slc7a1	0.643592	0.425424	24.1379	0.86176	51.2346
Stap2	0.64322	0.397712	5.17241	0.888727	8.76543
C1qtnf2	0.639863	0.567879	6.89655	0.711846	5.55556
Tead4	0.637524	0.513324	12.069	0.761724	7.53086
Ndnf	0.636659	0.398463	17.2414	0.874854	19.5062
Map3k8	0.636605	0.452288	5.17241	0.820922	8.76543
Far2	0.634749	0.437248	15.5172	0.83225	27.7778
Pde4c	0.634275	0.445198	10.3448	0.823352	3.95062
S1pr4	0.633971	0.318362	1.72414	0.94958	4.81481
Slc7a5	0.632998	0.38754	62.069	0.878457	62.4691
Ndrg1	0.632839	0.550877	53.4483	0.714801	43.7037
Fgd5	0.631422	0.425812	27.5862	0.837032	34.1975
Arhgef15	0.629226	0.426401	10.3448	0.83205	24.0741
Vsig2	0.629086	0.277865	1.72414	0.980307	5.30864
Col4a1	0.628579	0.469022	53.4483	0.788135	26.7901
Jag2	0.628222	0.526076	27.5862	0.730368	6.41975
Crip1	0.625784	0.38029	25.8621	0.871279	40.7407
Grasp	0.625442	0.422498	8.62069	0.828387	10
Fendrr	0.624304	0.289383	1.72414	0.959224	4.5679
Sod3	0.623881	0.419883	27.5862	0.827879	12.716
Ccdc141	0.623861	0.504699	32.7586	0.743023	69.7531
Hspb1	0.623332	0.453265	53.4483	0.793398	50.2469
Eogt	0.622958	0.434465	34.4828	0.811452	33.0864
A330009N23Rik	0.622692	0.454038	5.17241	0.791346	2.71605
Smtn	0.620789	0.438371	25.8621	0.803207	14.1975
Ptp4a3	0.618816	0.526873	25.8621	0.710758	18.0247
Isg15	0.617754	0.31942	12.069	0.916088	22.2222
Tek	0.617253	0.407151	24.1379	0.827355	57.037
Serpinb6b	0.61684	0.365066	12.069	0.868614	5.30864
Tpm2	0.616677	0.499035	1.72414	0.734319	3.82716
Tns1	0.616022	0.566578	56.8966	0.665466	49.6296
Ccl11	0.615914	0.549764	6.89655	0.682064	1.23457
Myct1	0.615118	0.275691	1.72414	0.954546	5.92593
Nfkbia	0.613454	0.412879	67.2414	0.814029	46.0494
Rras	0.613437	0.38188	37.931	0.844994	11.7284
Rasgrp3	0.612925	0.612978	37.931	0.612872	47.9012
Atox1	0.612467	0.434477	50	0.790457	59.2593
Tgfb1i1	0.61163	0.39223	22.4138	0.831029	10
Magix	0.610112	0.391455	5.17241	0.828768	2.71605
Edn3	0.605707	0.478798	10.3448	0.732615	4.44444
Rsad2	0.605538	0.349271	13.7931	0.861804	7.03704
Vwa1	0.604695	0.414454	58.6207	0.794936	45.5556
Myo1b	0.604512	0.528908	27.5862	0.680116	32.3457
Impdh1	0.602825	0.508348	18.9655	0.697303	18.8889
Hrct1	0.600821	0.275691	1.72414	0.925952	10.2469
Mfng	0.600625	0.422043	8.62069	0.779207	8.76543
Anxa3	0.599931	0.482887	34.4828	0.716975	39.0123
Epas1	0.598432	0.370868	79.3103	0.825996	66.2963
Capg	0.596361	0.394971	12.069	0.797752	9.01235
Gm12185	0.595042	0.582144	22.4138	0.607941	9.87654
Hba-a2	0.594755	0.545034	22.4138	0.644476	14.5679
Bgn	0.594106	0.495487	31.0345	0.692725	8.39506
Itpripl2	0.593637	0.34588	12.069	0.841395	12.4691
Myl12a	0.593134	0.316533	58.6207	0.869736	49.0123
Alox12	0.589001	0.54207	12.069	0.635933	2.59259
Bik	0.588999	0.521087	1.72414	0.656912	0.864198
Syt15	0.588972	0.495104	5.17241	0.68284	1.35802
Hba-a1	0.588879	0.551162	20.6897	0.626596	16.2963
Cgnl1	0.588005	0.510301	20.6897	0.66571	35.0617
Ebf1	0.585099	0.519958	44.8276	0.650239	84.8148
Nos2	0.5845	0.432209	5.17241	0.736791	1.48148
Dennd3	0.584137	0.356771	17.2414	0.811504	24.9383
Fam110a	0.583294	0.434698	6.89655	0.73189	6.91358
AI467606	0.582194	0.333311	12.069	0.831077	8.2716
Palmd	0.581654	0.337043	25.8621	0.826265	46.2963
Cmtm8	0.581539	0.353421	18.9655	0.809656	22.2222
Bche	0.579827	0.582352	12.069	0.577303	12.963
Id1	0.579388	0.273763	60.3448	0.885014	60.6173
Arhgdib	0.577678	0.596364	10.3448	0.558991	9.25926
Efna1	0.57594	0.320134	12.069	0.831746	9.01235
Dusp6	0.575475	0.456083	24.1379	0.694868	11.8519
Col4a2	0.574371	0.504051	48.2759	0.644691	23.8272
Colgalt2	0.573873	0.39003	17.2414	0.757717	18.2716
Zfp36	0.572805	0.415596	32.7586	0.730013	6.54321
Fli1	0.572534	0.496672	18.9655	0.648396	51.1111
Nodal	0.572363	0.258198	1.72414	0.886528	3.33333
Bvht	0.572049	0.269676	17.2414	0.874421	13.3333
Bcl6b	0.571063	0.283804	1.72414	0.858322	4.32099
A930033H14Rik	0.570417	0.547093	8.62069	0.593741	6.2963
Ifitm3	0.57019	0.287531	43.1034	0.852849	59.6296
Ier3	0.570142	0.407848	18.9655	0.732436	13.9506
Prdm1	0.569916	0.556376	8.62069	0.583456	3.82716
Nrp1	0.568309	0.531567	53.4483	0.605051	52.8395
Aqp11	0.568041	0.319074	20.6897	0.817008	19.3827
Ifitm2	0.567566	0.244375	22.4138	0.890757	41.1111
Gngt2	0.566964	0.509618	10.3448	0.62431	4.69136
Sult1a1	0.565728	0.471787	15.5172	0.659669	7.28395
Parvb	0.562095	0.417857	25.8621	0.706333	32.963
Trim16	0.561925	0.32092	3.44828	0.802929	9.25926
Pla1a	0.561724	0.323328	5.17241	0.800121	6.54321
Adamtsl2	0.559895	0.40595	5.17241	0.713841	4.19753
Uaca	0.559491	0.495427	32.7586	0.623556	20.9877
Heyl	0.556729	0.538847	15.5172	0.574612	7.77778
AI661453	0.555214	0.288249	1.72414	0.82218	0.740741
Elk3	0.554539	0.453089	18.9655	0.655988	29.2593
Fzd6	0.554312	0.252519	32.7586	0.856105	26.5432
Ets2	0.553984	0.37153	29.3103	0.736439	11.7284
Slc6a6	0.553543	0.352548	46.5517	0.754538	77.284
Ahnak	0.553342	0.350617	63.7931	0.756067	35.1852
Helz2	0.552155	0.323317	10.3448	0.780994	7.90123
Socs2	0.551492	0.411262	22.4138	0.691723	14.0741
Plxnd1	0.551321	0.29105	15.5172	0.811593	9.01235
Slc16a4	0.550844	0.278528	18.9655	0.82316	20.6173
Fmnl3	0.549431	0.491828	17.2414	0.607033	20.6173
Arl4a	0.549185	0.29266	27.5862	0.80571	42.0988
Tdrp	0.549135	0.296653	18.9655	0.801617	13.8272
Lmo7	0.549051	0.319543	10.3448	0.778559	24.5679
Layn	0.549011	0.32424	10.3448	0.773782	15.3086
9930111J21Rik2	0.548585	0.554821	15.5172	0.54235	2.96296
Gm13889	0.548318	0.459615	13.7931	0.637022	8.14815
Arhgap29	0.548183	0.448839	43.1034	0.647528	45.679
Tns2	0.548117	0.441051	41.3793	0.655182	22.963
Tagln2	0.547789	0.332002	41.3793	0.763576	31.7284
Kcne4	0.547014	0.44435	3.44828	0.649678	1.48148
Gvin1	0.546536	0.446769	5.17241	0.646303	3.20988
Sebox	0.546011	0.277865	1.72414	0.814157	2.22222
Slc39a10	0.545356	0.286356	50	0.804356	60.7407
Pear1	0.544839	0.412431	12.069	0.677247	13.3333
Arhgap31	0.544619	0.535339	39.6552	0.553899	62.8395
Oas1a	0.544246	0.295869	5.17241	0.792624	2.46914
Slco2b1	0.542421	0.541081	24.1379	0.543762	29.6296
H2-Q7	0.542207	0.369081	3.44828	0.715333	3.45679
Ece1	0.540466	0.460546	44.8276	0.620386	34.4444
Shroom1	0.540078	0.513601	6.89655	0.566555	10.4938
Lgals9	0.539588	0.445241	27.5862	0.633936	15.9259
Casq2	0.538519	0.393571	15.5172	0.683468	9.01235
Il10rb	0.53812	0.273647	20.6897	0.802592	23.8272
Bmp15	0.538094	0.261129	1.72414	0.815059	0.246914
Shroom4	0.537618	0.506694	13.7931	0.568541	23.3333
Rgcc	0.537049	0.447199	56.8966	0.6269	40.9877
Arpc1b	0.536071	0.389746	34.4828	0.682395	37.5309
Shank3	0.534799	0.348449	20.6897	0.721148	20.9877
Zap70	0.534771	0.293344	3.44828	0.776198	3.20988
Perp	0.53388	0.260634	15.5172	0.807125	6.91358
E030030I06Rik	0.532709	0.351596	1.72414	0.713823	2.83951
Sap30	0.532173	0.449015	6.89655	0.615332	3.08642
Gbp7	0.5313	0.320832	20.6897	0.741768	13.0864
Mcf2l	0.52995	0.393375	36.2069	0.666525	37.5309
Tgfbr2	0.529103	0.467422	46.5517	0.590783	35.8025
Steap4	0.528524	0.443686	5.17241	0.613361	0.617284
Cdc42ep3	0.528473	0.360408	15.5172	0.696537	15.4321
Slc30a1	0.527847	0.204831	44.8276	0.850862	34.0741
Cyb5r3	0.526735	0.394489	51.7241	0.658982	26.2963
Slc2a1	0.526415	0.227821	68.9655	0.825009	73.8272
Akap12	0.525767	0.477589	43.1034	0.573944	27.9012
Eva1b	0.525304	0.213636	13.7931	0.836971	22.2222
Mgp	0.525251	0.518189	32.7586	0.532313	13.4568
Sipa1	0.524254	0.406773	22.4138	0.641734	22.3457
Ism1	0.523949	0.21446	8.62069	0.833437	11.6049
Dusp3	0.523012	0.386526	29.3103	0.659498	37.1605
Ube2l6	0.522442	0.409202	13.7931	0.635682	6.41975
Mal	0.522363	0.586861	51.7241	0.457865	27.5309
Slc1a1	0.522232	0.384812	24.1379	0.659652	37.284
Lyl1	0.520641	0.49185	3.44828	0.549431	2.96296
Lmcd1	0.520595	0.469797	10.3448	0.571393	4.93827
Pllp	0.520537	0.539575	22.4138	0.5015	22.3457
Gm5127	0.520043	0.369707	5.17241	0.670379	2.71605
Egflam	0.519713	0.383722	12.069	0.655705	18.0247
Fes	0.519446	0.510338	6.89655	0.528553	4.69136
Esyt1	0.518772	0.43661	24.1379	0.600934	11.8519
Uba7	0.518535	0.446701	5.17241	0.590368	0.617284
Tmem123	0.515617	0.273457	41.3793	0.757778	19.7531
Rgs4	0.514209	0.423688	24.1379	0.60473	18.3951
Gbp5	0.513972	0.289031	6.89655	0.738913	5.80247
Adap2	0.513786	0.588999	6.89655	0.438572	15.0617
Gm9780	0.51375	0.307174	15.5172	0.720325	0.864198
Sp110	0.512553	0.317606	1.72414	0.7075	7.28395
Tbx2	0.512122	0.398114	6.89655	0.62613	6.17284
Card10	0.510603	0.288777	8.62069	0.732429	9.75309
Sept11	0.510504	0.422141	25.8621	0.598866	30.4938
Ecm1	0.5101	0.289383	1.72414	0.730818	12.4691
Tmem71	0.509953	0.492304	5.17241	0.527603	2.59259
H2-D1	0.509489	0.367671	41.3793	0.651308	59.0123
Art3	0.508413	0.463042	13.7931	0.553785	16.2963
Cd200	0.508361	0.438568	46.5517	0.578153	35.8025
Pdgfrb	0.508333	0.410035	39.6552	0.606631	25.9259
Trpc4	0.508107	0.486995	8.62069	0.52922	8.51852
Kctd12	0.506997	0.379613	37.931	0.634382	13.0864
Dysf	0.506186	0.282758	8.62069	0.729614	9.87654
Rab11fip1	0.506156	0.171816	12.069	0.840496	14.8148
Hspg2	0.50604	0.278438	18.9655	0.733642	22.716
Slc6a20a	0.505627	0.560704	24.1379	0.45055	17.5309
B2m	0.502479	0.35582	77.5862	0.649139	62.8395
Cracr2b	0.502403	0.144288	10.3448	0.860518	13.9506
Rasl12	0.501736	0.559421	8.62069	0.444051	5.67901
Gsdmd	0.501722	0.492095	6.89655	0.511349	4.81481
Mecom	0.501304	0.152813	17.2414	0.849795	70.3704
Med10	0.498481	0.499035	1.72414	0.497928	11.4815
Maff	0.498119	0.356768	3.44828	0.63947	2.34568
Cnn2	0.497214	0.217936	20.6897	0.776491	15.9259
Abhd2	0.495734	0.330186	31.0345	0.661283	63.3333
Notch3	0.489355	0.308682	36.2069	0.670028	22.4691
Pf4	0.489113	0.483715	5.17241	0.494511	0.987654
Lrrn3	0.489067	0.244667	18.9655	0.733468	18.3951
8430408G22Rik	0.48895	0	0	0.9779	11.358
Gm694	0.488155	0	0	0.976309	28.2716
Clic4	0.487957	0.408573	63.7931	0.567342	45.4321
Sgms1	0.487464	0.338904	56.8966	0.636024	83.9506
Gm9946	0.486794	0	0	0.973588	7.16049
Prkd2	0.485105	0.334248	15.5172	0.635963	16.6667
Bnip2	0.484044	0.281333	12.069	0.686755	20.7407
Ocln	0.48331	0.144749	34.4828	0.821871	42.2222
Crip2	0.482577	0.160314	53.4483	0.80484	64.6914
Ccnd1	0.481995	0.435006	8.62069	0.528983	9.01235
Stard8	0.481749	0.369797	25.8621	0.5937	23.5802
H2-K1	0.481699	0.310617	44.8276	0.652781	38.0247
Ehd4	0.480777	0.511642	31.0345	0.449913	12.0988
Gm609	0.480662	0	3.44828	0.961324	11.4815
Ctsh	0.479383	0.310641	29.3103	0.648125	31.358
Iqgap1	0.478507	0.37473	51.7241	0.582285	31.8519
Adora2a	0.478202	0.216508	8.62069	0.739895	4.5679
Bcl3	0.47631	0.277865	1.72414	0.674754	1.23457
Polk	0.475814	0.292911	25.8621	0.658717	40.9877
4930578C19Rik	0.473802	0	0	0.947604	28.7654
Rps16	0.472484	0.319308	68.9655	0.62566	49.5062
Cysltr2	0.471169	0	0	0.942337	3.08642
Slc26a10	0.470241	0	5.17241	0.940482	7.77778
Rnf144b	0.469747	0.305439	18.9655	0.634056	26.1728
Mef2c	0.468945	0.42641	37.931	0.51148	38.642
Igsf5	0.467264	0	1.72414	0.934527	11.6049
5430416O09Rik	0.467032	0	0	0.934063	5.80247
Rassf3	0.466474	0.342954	32.7586	0.589994	30.8642
Slfn3	0.466399	0	0	0.932798	4.07407
Grb7	0.464546	0	0	0.929091	3.58025
Tm4sf1	0.464385	0.271376	56.8966	0.657394	39.0123
Tcf23	0.464181	0	0	0.928361	2.09877
Sigirr	0.463287	0	0	0.926574	10.6173
A530084C06Rik	0.463271	0	0	0.926543	1.97531
Slc25a24	0.463027	0.352971	13.7931	0.573083	3.95062
Ankrd50	0.462977	0.273396	22.4138	0.652558	11.9753
9430020K01Rik	0.462525	0	0	0.92505	61.358
Erg	0.462397	0	13.7931	0.924793	44.0741
Mill2	0.462228	0.353708	17.2414	0.570749	27.6543
Mylk	0.46124	0.203011	29.3103	0.719469	15.1852
Phldb2	0.46103	0.397436	22.4138	0.524625	27.4074
Gbp3	0.460317	0	3.44828	0.920634	10.6173
H2-T23	0.460155	0.274831	15.5172	0.64548	5.67901
Nkd1	0.459566	0.112648	15.5172	0.806484	17.037
Abcc4	0.459089	0.151175	31.0345	0.767004	42.8395
Mrvi1	0.458504	0.536446	6.89655	0.380562	9.01235
Gm13536	0.458275	0	0	0.916551	0.864198
Gm15998	0.45794	0	0	0.91588	3.82716
Foxs1	0.457022	0	1.72414	0.914043	3.7037
Cdkn2b	0.456243	0	0	0.912485	6.17284
Gm16143	0.455858	0	0	0.911717	0.864198
Olfr558	0.455305	0	1.72414	0.91061	1.7284
Sh2d3c	0.455296	0.264459	17.2414	0.646133	20.3704
Ifi44	0.454886	0	6.89655	0.909772	5.4321
Tspan13	0.453907	0.246338	63.7931	0.661476	59.8765
Gm16104	0.453725	0	0	0.90745	0.740741
Isyna1	0.453602	0.216006	29.3103	0.691197	31.9753
Rps19	0.453553	0.290611	62.069	0.616496	54.321
Gbp2	0.453353	0.072489	15.5172	0.834218	8.14815
Gbp8	0.453046	0.298724	10.3448	0.607368	5.67901
Man2a1	0.452454	0.471935	20.6897	0.432972	15.5556
Meox1	0.452203	0.519043	1.72414	0.385363	0.987654
Prrt4	0.451589	0.380862	6.89655	0.522316	1.97531
Mall	0.451551	0	5.17241	0.903102	5.92593
Gm13861	0.451442	0	0	0.902884	5.30864
Rhoj	0.451114	0.439963	39.6552	0.462266	25.3086
Gimap4	0.451053	0	3.44828	0.902107	1.85185
Phf11d	0.450825	0	1.72414	0.90165	1.7284
Notumos	0.450331	0	0	0.900661	0.740741
Gm9917	0.450123	0	0	0.900245	7.53086
Ptpn14	0.449279	0.336772	13.7931	0.561785	15.679
Grrp1	0.449111	0	10.3448	0.898223	14.0741
Rps18	0.449067	0.273065	65.5172	0.625069	44.4444
Tbc1d4	0.448514	0.207165	22.4138	0.689862	58.2716
Srgn	0.448431	0.020701	50	0.876162	36.7901
Il13ra1	0.448176	0.51572	12.069	0.380633	7.28395
B4galt4	0.447975	0.233601	27.5862	0.662348	15.9259
Tgfb1	0.447925	0.486903	6.89655	0.408948	6.79012
Cfh	0.44739	0.521579	29.3103	0.373202	16.7901
Snrk	0.446892	0.394097	55.1724	0.499687	36.9136
Cox4i2	0.446819	0	5.17241	0.893639	17.6543
Klf6	0.44515	0.278059	36.2069	0.612241	19.7531
Mfsd2a	0.444916	0.178474	15.5172	0.711359	22.0988
Atp13a5	0.444901	0.301809	25.8621	0.587994	30.7407
Igfbp3	0.444687	0.468662	34.4828	0.420713	2.22222
Rpl29	0.444458	0.221102	48.2759	0.667813	32.5926
Filip1l	0.442207	0.401558	8.62069	0.482855	7.53086
Fam212a	0.441923	0	0	0.883847	15.5556
Efr3b	0.441861	0.326081	17.2414	0.557642	49.2593
Irf7	0.441146	0	3.44828	0.882291	9.25926
Ctla2b	0.440972	0	0	0.881944	4.93827
Ptprg	0.439942	0.264375	58.6207	0.61551	89.5062
Stat6	0.43929	0.353514	15.5172	0.525067	7.03704
Spock2	0.439143	0.14826	77.5862	0.730026	80.9877
Plk2	0.438628	0.151721	20.6897	0.725535	19.3827
Nes	0.438456	0	36.2069	0.876912	24.8148
Apcdd1	0.438431	0	0	0.876862	18.3951
4930555A03Rik	0.4378	0	0	0.875599	1.35802
Ier2	0.437697	0	10.3448	0.875394	25.0617
Ggt1	0.437325	0	6.89655	0.87465	6.2963
ENSMUSG00000086584	0.436635	0.873271	5.17241	0	0
Slc38a11	0.436188	0	3.44828	0.872377	17.7778
Islr2	0.435992	0	1.72414	0.871983	0.864198
1700016D06Rik	0.435593	0.270868	1.72414	0.600318	16.0494
Hspb2	0.435259	0	0	0.870518	2.34568
Depp1	0.435017	0.870035	5.17241	0	0
4930425O10Rik	0.434161	0	0	0.868322	0.864198
Itgb1	0.434059	0.353687	53.4483	0.514431	33.5802
Saa2	0.433457	0	0	0.866914	1.97531
Mospd1	0.433268	0.156507	20.6897	0.710028	23.0864
Ctla4	0.432621	0.243265	62.069	0.621977	30.2469
Rad54b	0.432238	0	0	0.864476	10.4938
Dok4	0.431818	0	3.44828	0.863636	7.28395
Ptrf	0.431703	0	0	0.863407	34.1975
Rrad	0.431352	0	0	0.862703	5.80247
A630077J23Rik	0.430792	0	0	0.861584	1.11111
Tnfaip1	0.430791	0.222187	43.1034	0.639395	19.3827
Lnx2	0.429383	0	8.62069	0.858765	20.2469
Mylpf	0.429273	0	0	0.858545	3.95062
E030037K01Rik	0.429104	0	0	0.858207	0.37037
Rps20	0.428689	0.265181	65.5172	0.592197	30.7407
Ggt5	0.427893	0.342939	12.069	0.512847	7.77778
Rps25	0.427629	0.239037	72.4138	0.61622	41.7284
Gm13056	0.427194	0	0	0.854388	2.09877
Clec1a	0.427043	0.342129	5.17241	0.511958	3.45679
Gm20655	0.4269	0	0	0.8538	3.58025
N4bp3	0.426705	0	6.89655	0.853411	7.53086
Mannr	0.426321	0	0	0.852642	3.7037
Fcgrt	0.426292	0.0077534	37.931	0.844831	49.1358
Ifit1	0.425354	0	12.069	0.850709	13.5802
Ly6i	0.425175	0	0	0.850349	0.37037
Arl4d	0.424873	0	8.62069	0.849747	8.64198
Kif1c	0.42483	0.226152	31.0345	0.623507	20
Alas2	0.424062	0.317606	1.72414	0.530517	2.09877
Rpl18a	0.423822	0.218815	65.5172	0.628829	58.0247
Rps6	0.423778	0.249696	55.1724	0.597861	45.9259
Cald1	0.423195	0.341102	53.4483	0.505288	45.4321
Dock6	0.423129	0.219025	20.6897	0.627232	29.3827
Rps3a1	0.422598	0.245719	65.5172	0.599476	37.9012
1700097N02Rik	0.422129	0	0	0.844258	0.37037
Dmgdh	0.422017	0	0	0.844033	2.34568
Ncaph	0.421824	0	0	0.843647	1.97531
Myl12b	0.421801	0.200506	51.7241	0.643096	42.4691
Vil1	0.421475	0	3.44828	0.842951	1.7284
Tmsb4x	0.420355	0.236708	96.5517	0.604002	85.9259
Rps23	0.420295	0.243681	70.6897	0.596909	53.8272
Gm28410	0.42009	0	0	0.84018	0.987654
Rps4x	0.419899	0.226216	67.2414	0.613583	43.9506
Rhbdf2	0.419146	0	3.44828	0.838292	7.90123
Acta2	0.419113	0	1.72414	0.838226	3.58025
ENSMUSG00000107481	0.418941	0.837882	5.17241	0	0
Arhgap10	0.418854	0.38366	12.069	0.454048	10.9877
Dnah2os	0.418513	0	0	0.837027	1.35802
Tpt1	0.418405	0.264542	75.8621	0.572268	46.7901
Gm20532	0.41763	0	0	0.83526	4.32099
Msrb3	0.417352	0.303148	20.6897	0.531556	20.6173
Il1r1	0.416859	0.137729	12.069	0.695989	8.64198
Crtap	0.416829	0.121507	20.6897	0.712152	6.04938
4930598F16Rik	0.416699	0	0	0.833398	0.246914
Rasd1	0.416385	0	6.89655	0.832771	5.92593
Rps5	0.415881	0.272729	68.9655	0.559032	43.2099
Rps9	0.415833	0.281155	70.6897	0.550511	45.5556
Gm43536	0.415535	0	0	0.831069	2.09877
2700046A07Rik	0.415422	0.3125	1.72414	0.518344	2.22222
Tmsb10	0.415416	0.263373	39.6552	0.56746	53.9506
Fas	0.415274	0	6.89655	0.830547	19.1358
ENSMUSG00000081219	0.414301	0.828602	5.17241	0	0
Ephb4	0.414093	0	1.72414	0.828186	12.4691
Apol7c	0.41262	0.825241	3.44828	0	0.246914
Mos	0.412559	0	0	0.825119	0.246914
Gm9956	0.412432	0	0	0.824865	0.740741
Cpb2	0.412004	0	0	0.824008	0.246914
Cdkn2c	0.411291	0	3.44828	0.822582	2.34568
Pla2r1	0.410856	0.265305	10.3448	0.556408	5.67901
Rhoc	0.410546	0	29.3103	0.821093	30
Rpl39	0.410494	0.222661	44.8276	0.598326	26.9136
Sdpr	0.410326	0	0	0.820652	27.6543
Irgm2	0.41032	0.27964	15.5172	0.541001	9.1358
Sptbn1	0.409945	0.257036	91.3793	0.562853	87.284
Plpp6	0.409842	0	18.9655	0.819685	11.358
Mfsd7c	0.409676	0	0	0.819351	18.8889
Bsg	0.409575	0.190957	75.8621	0.628193	96.4198
Serinc3	0.409533	0.250657	94.8276	0.568409	51.9753
RP24-78M9.6	0.408937	0	0	0.817875	0.864198
Olfm5	0.40873	0	0	0.817461	0.740741
Usp18	0.408552	0	5.17241	0.817104	11.6049
Rps29	0.408214	0.206934	82.7586	0.609493	64.1975
Mfge8	0.408078	0.0936353	27.5862	0.722521	24.4444
Acp5	0.407992	0	0	0.815984	1.11111
Ppfibp1	0.407206	0.34818	20.6897	0.466232	27.9012
Gch1	0.407147	0	13.7931	0.814294	14.1975
Rpl34	0.407055	0.214285	53.4483	0.599825	33.3333
Rpl27a	0.406759	0.22277	75.8621	0.590748	44.9383
Gm13571	0.406212	0	0	0.812424	0.864198
Ablim1	0.406181	0.200594	50	0.611768	68.0247
Rap1b	0.40614	0.16729	48.2759	0.644989	28.2716
S100a13	0.405838	0	13.7931	0.811676	34.0741
Arhgap27os1	0.404514	0	0	0.809029	0.987654
B3gnt3	0.404064	0	0	0.808128	0.617284
Plscr2	0.403371	0.100805	13.7931	0.705937	14.4444
Sgk1	0.403273	0.542072	29.3103	0.264473	12.8395
Serpinb9	0.403139	0	12.069	0.806277	10.9877
Lancl3	0.403093	0	0	0.806185	5.92593
Rnf125	0.402551	0	6.89655	0.805103	7.28395
Dab2ip	0.402456	0.172624	31.0345	0.632289	28.8889
Rtp4	0.402169	0	8.62069	0.804339	18.1481
Rhobtb1	0.402139	0.160426	17.2414	0.643852	27.9012
Fam124b	0.402021	0	0	0.804043	0.617284
Tspo	0.401294	0	12.069	0.802588	27.6543
Ccdc102a	0.400884	0	5.17241	0.801768	4.81481
Rps3	0.400556	0.223106	62.069	0.578007	46.5432
Tead2	0.400419	0	10.3448	0.800839	5.92593
Ostf1	0.400275	0.125692	24.1379	0.674858	34.4444
AW011738	0.400222	0	0	0.800445	2.59259
Hmgb2	0.399792	0	3.44828	0.799584	8.88889
4930523C07Rik	0.399747	0	6.89655	0.799494	17.4074
Pydc3	0.399653	0	0	0.799306	0.493827
Pik3r6	0.399617	0	3.44828	0.799234	12.5926
Rpl23	0.399454	0.216844	65.5172	0.582064	41.2346
Kctd10	0.399302	0	0	0.798605	26.0494
Tbx4	0.399287	0.32621	1.72414	0.472363	0.493827
Arf6	0.398628	0	13.7931	0.797256	20.9877
Dlc1	0.397964	0.254289	58.6207	0.541639	63.7037
P2ry2	0.397912	0	0	0.795825	0.617284
S100a11	0.397685	0.185374	27.5862	0.609996	20
Gng5	0.397664	0	36.2069	0.795328	43.0864
Abcc6	0.397657	0	0	0.795315	6.66667
Rpl37a	0.397036	0.19276	65.5172	0.601312	51.1111
RP23-198F11.3	0.39666	0	0	0.79332	1.7284
Ankdd1b	0.396182	0	0	0.792364	3.20988
Bst2	0.396137	0	10.3448	0.792274	19.0123
Tfpi	0.395846	0.172708	15.5172	0.618983	9.75309
Fam129b	0.395633	0.201629	29.3103	0.589636	16.6667
Kctd12b	0.395334	0	12.069	0.790667	7.53086
Rasgrp4	0.395012	0	3.44828	0.790023	8.02469
Tsc22d1	0.394444	0.178517	86.2069	0.610371	72.3457
Rps14	0.394389	0.177043	68.9655	0.611736	59.2593
Tfrc	0.393933	0	24.1379	0.787865	32.8395
LOC115489602	0.393587	0.787174	3.44828	0	0
Psmb8	0.393295	0	10.3448	0.78659	12.3457
Mesdc1	0.392419	0	0	0.784838	9.01235
Cnot6l	0.392222	0.243375	36.2069	0.54107	26.1728
2310001H17Rik	0.392102	0	0	0.784204	6.17284
Sh3bp4	0.391939	0.251652	20.6897	0.532226	15.3086
Hhex	0.391387	0	1.72414	0.782773	4.81481
Ackr3	0.391114	0.11011	15.5172	0.672118	13.2099
Gimap9	0.390973	0	5.17241	0.781945	3.58025
Rhob	0.390934	0.164986	62.069	0.616882	30.7407
Pde2a	0.390854	0	0	0.781707	35.679
Rps15a	0.390655	0.225069	60.3448	0.55624	17.9012
Rnf213	0.389264	0.291374	24.1379	0.487153	16.9136
Pltp	0.389197	0	0	0.778395	83.4568
Hcar1	0.389152	0.496542	3.44828	0.281763	0.37037
Elovl7	0.388636	0.306707	15.5172	0.470565	30
Plaur	0.388178	0	1.72414	0.776356	6.41975
Cytl1	0.388023	0	0	0.776046	0.987654
Igf1r	0.387756	0.185571	55.1724	0.589942	90
Rps28	0.387606	0.196542	63.7931	0.57867	30
Snai2	0.387484	0	1.72414	0.774968	1.11111
Ucp2	0.387089	0	46.5517	0.774178	27.284
Cd40	0.386977	0	1.72414	0.773954	5.30864
S1pr3	0.386591	0	13.7931	0.773183	10.4938
Gm15722	0.386207	0	0	0.772413	2.22222
Slc7a9	0.386042	0	0	0.772085	0.246914
Rps17	0.385952	0.151543	48.2759	0.620361	28.642
Gm7676	0.385948	0	0	0.771896	0.617284
Il27ra	0.385774	0	0	0.771548	0.617284
4933402J07Rik	0.385627	0	0	0.771253	1.7284
Adh1	0.385568	0.643329	6.89655	0.127808	0.617284
Alas1	0.385466	0	17.2414	0.770933	30.7407
Gm28187	0.385305	0	0	0.770611	0.246914
Asb4	0.385274	0	1.72414	0.770547	4.5679
Sh3tc1	0.385049	0	0	0.770098	6.2963
Ehd2	0.38493	0	10.3448	0.76986	13.9506
Cspg4	0.384757	0.519856	17.2414	0.249658	9.62963
Lgals3bp	0.383817	0	22.4138	0.767634	10
Amotl1	0.382962	0.220607	39.6552	0.545317	20.8642
4930486L24Rik	0.382867	0	0	0.765735	1.23457
Dusp1	0.38245	0.0106194	31.0345	0.754281	16.9136
Stab1	0.382213	0.326045	8.62069	0.438382	10.1235
St3gal6	0.381646	0.121438	37.931	0.641854	61.9753
4933417O13Rik	0.381489	0	0	0.762978	0.493827
Rps27rt	0.381354	0.214402	81.0345	0.548306	72.2222
Eps8l2	0.381272	0	0	0.762544	11.4815
Rpl18	0.381057	0.135973	56.8966	0.626141	43.2099
Ntn4	0.38064	0.361043	12.069	0.400237	5.67901
Gpx1	0.380386	0.0552957	43.1034	0.705475	20.4938
Csrp2	0.38023	0	3.44828	0.76046	16.9136
4930562F07Rik	0.380128	0	0	0.760256	0.617284
Gsta4	0.379977	0	18.9655	0.759954	28.7654
Slc1a5	0.379891	0.53369	8.62069	0.226091	4.19753
Epor	0.379724	0	0	0.759447	1.11111
Rps2	0.379553	0.195874	63.7931	0.563232	11.2346
Atp2a3	0.379427	0	0	0.758854	6.04938
Ccdc85b	0.37937	0	18.9655	0.758739	18.8889
Il34	0.378936	0.313618	15.5172	0.444255	14.9383
Ly75	0.378755	0	6.89655	0.757509	6.66667
Rplp0	0.378193	0.149005	53.4483	0.607381	29.8765
9530082P21Rik	0.378115	0.322271	5.17241	0.433959	5.4321
Klf11	0.377855	0	6.89655	0.75571	7.40741
Def6	0.377597	0	0	0.755194	11.4815
Rps8	0.3768	0.185969	60.3448	0.567631	58.5185
Rapgef5	0.3767	0.38696	24.1379	0.36644	26.1728
Rpl35a	0.376505	0.186267	58.6207	0.566742	46.0494
St3gal1	0.375973	0	8.62069	0.751946	7.53086
Unc5b	0.375778	0.335865	6.89655	0.415691	10.4938
Itpripl1	0.375423	0	1.72414	0.750846	5.30864
Piezo1	0.375072	0	0	0.750145	9.75309
Syne2	0.375061	0.20863	17.2414	0.541492	20.7407
Itga4	0.37484	0.132526	6.89655	0.617154	10.7407
Fmo2	0.374483	0.0253916	13.7931	0.723575	7.65432
Rps7	0.374368	0.135624	55.1724	0.613112	24.1975
Mndal	0.373934	0	6.89655	0.747869	9.25926
Med28	0.372256	0.133549	37.931	0.610964	26.2963
Spry4	0.372158	0.394921	12.069	0.349395	2.96296
Serpina3g	0.371927	0.275691	1.72414	0.468164	0.617284
Myh11	0.37191	0	5.17241	0.74382	5.18519
Nod2	0.371843	0	0	0.743687	1.85185
Nampt	0.37154	0.0464245	32.7586	0.696656	25.679
Vim	0.371334	0	53.4483	0.742668	34.9383
Lama5	0.371217	0.123218	6.89655	0.619216	9.62963
Gnb4	0.371195	0.285562	15.5172	0.456829	17.284
Ctnnb1	0.371149	0	0	0.742298	56.2963
Mapk3	0.371147	0.150586	32.7586	0.591708	25.1852
Rps11	0.370747	0.167844	56.8966	0.573649	36.4198
Mcl1	0.370638	0	34.4828	0.741277	17.9012
Rpl5	0.370439	0.231553	62.069	0.509324	31.7284
Vamp8	0.370303	0	12.069	0.740607	21.4815
Ffar2	0.369771	0	0	0.739543	0.37037
Rpl38	0.369525	0.134632	65.5172	0.604418	48.2716
Wdr89	0.368996	0.227779	70.6897	0.510213	47.5309
Casp6	0.368894	0	8.62069	0.737787	7.77778
Fhl3	0.368175	0	1.72414	0.73635	3.7037
Rpl7	0.368086	0.120874	56.8966	0.615298	36.5432
Art4	0.36792	0.735841	3.44828	0	0
Mybph	0.367787	0	0	0.735575	0.37037
Cdkn1a	0.367426	0	31.0345	0.734851	21.7284
Fam65a	0.367385	0	0	0.734771	22.2222
Tax1bp3	0.367346	0	0	0.734691	11.9753
Lamb2	0.36716	0	24.1379	0.734319	26.5432
Slc16a12	0.366931	0.306036	13.7931	0.427826	11.7284
Enc1	0.366193	0	12.069	0.732386	10.6173
Srarp	0.366151	0.732303	22.4138	0	0
Adrb2	0.366027	0	0	0.732053	8.88889
Sertad1	0.365827	0	5.17241	0.731655	5.06173
Pcp4l1	0.365257	0.0124811	53.4483	0.718034	48.8889
Ephx3	0.365121	0	0	0.730242	1.35802
Rpl22	0.365042	0.116924	43.1034	0.61316	25.4321
Gm11730	0.364639	0	0	0.729278	0.37037
Ptgs2	0.364635	0.507232	3.44828	0.222038	0.740741
Fn1	0.364544	0	58.6207	0.729087	40.6173
1810011O10Rik	0.363276	0	0	0.726551	2.83951
Lilrb4a	0.363014	0.503944	1.72414	0.222085	0.37037
Rpl8	0.362948	0.140965	55.1724	0.58493	47.4074
H2-Aa	0.362416	0.333865	12.069	0.390967	1.48148
Gm12355	0.362255	0	0	0.72451	2.22222
Myl6	0.361956	0.121243	62.069	0.60267	73.0864
Kitl	0.361838	0.0100227	44.8276	0.713654	59.0123
Cyp26b1	0.361304	0.419791	10.3448	0.302817	2.46914
Rpl36	0.360632	0.178808	55.1724	0.542455	29.6296
Crispld1	0.360394	0	3.44828	0.720788	10.7407
Ifi27l2a	0.360195	0	3.44828	0.72039	2.09877
H2-Q4	0.36013	0	5.17241	0.72026	7.65432
Rai14	0.360019	0	6.89655	0.720039	25.9259
Tagln	0.359744	0	1.72414	0.719488	2.34568
Vat1	0.359557	0.110538	31.0345	0.608576	26.4198
Gm16282	0.359492	0	0	0.718984	2.46914
Scarb1	0.358525	0.193335	32.7586	0.523715	19.3827
Casp12	0.358322	0.345859	5.17241	0.370784	4.32099
1700042O10Rik	0.358188	0	0	0.716375	12.5926
0610039K10Rik	0.358147	0	0	0.716295	0.37037
Ifit3	0.357935	0	5.17241	0.71587	6.91358
Frmd4b	0.357665	0.445753	31.0345	0.269577	47.284
Cd59a	0.357554	0	20.6897	0.715107	22.2222
Gcnt2	0.357435	0.109265	17.2414	0.605604	28.5185
Id3	0.356696	0.00132375	72.4138	0.712069	60
Rps27l	0.356609	0	25.8621	0.713218	22.716
Lbx2	0.356389	0	0	0.712779	0.493827
Isg20	0.355918	0	3.44828	0.711836	2.22222
Adam15	0.355413	0.179755	18.9655	0.531071	24.5679
Slc19a1	0.355061	0	17.2414	0.710122	14.1975
Rgs12	0.354796	0	15.5172	0.709593	31.2346
Arhgef5	0.354536	0	10.3448	0.709072	6.17284
Map3k11	0.354438	0	1.72414	0.708876	9.62963
Pcdh18	0.354415	0	8.62069	0.708831	6.41975
Timeless	0.3542	0	3.44828	0.7084	4.44444
Jag1	0.354004	0.163601	13.7931	0.544406	13.9506
Mcam	0.353918	0.485571	17.2414	0.222265	9.62963
Gm6563	0.353688	0	0	0.707376	9.01235
Fosl2	0.353616	0	1.72414	0.707232	4.93827
Myh9	0.353447	0.1967	31.0345	0.510193	35.5556
ENSMUSG00000083320	0.353304	0.706608	3.44828	0	0
Tbx3os1	0.352906	0	0	0.705812	16.0494
Il2ra	0.352407	0	1.72414	0.704813	0.987654
Pnpla2	0.351697	0	24.1379	0.703395	11.2346
Zak	0.351333	0	0	0.702666	23.5802
Slc6a13	0.350986	0.444809	13.7931	0.257162	6.2963
Stard4	0.350933	0	12.069	0.701866	11.1111
Rps21	0.350823	0.241084	77.5862	0.460563	12.5926
Irgm1	0.350805	0	6.89655	0.70161	8.51852
Myo1d	0.350635	0.351428	18.9655	0.349841	37.037
Ier5	0.350306	0	6.89655	0.700612	11.6049
Txnip	0.349892	0.0155068	46.5517	0.684277	21.7284
3110070M22Rik	0.349778	0	0	0.699556	0.864198
Plscr1	0.349756	0	0	0.699512	14.8148
Bmx	0.349741	0	1.72414	0.699482	3.08642
1700084F23Rik	0.348875	0	53.4483	0.69775	1.7284
Gm10260	0.347869	0	0	0.695739	0.617284
Rpl4	0.347433	0.132796	68.9655	0.562071	40.7407
Sh2b3	0.347176	0	12.069	0.694352	8.76543
Exoc3l	0.346825	0	0	0.693649	1.48148
Pomp	0.346793	0.0651379	39.6552	0.628447	42.963
4833403J16Rik	0.346773	0	0	0.693546	1.48148
Lzts1	0.346253	0	6.89655	0.692507	7.77778
Eef1a1	0.345512	0.172844	87.931	0.51818	60.9877
Ldlrap1	0.345478	0.283355	6.89655	0.407601	4.69136
Triobp	0.34526	0	12.069	0.69052	12.963
Acy3	0.345062	0	1.72414	0.690124	2.96296
Gm12158	0.344239	0	0	0.688478	1.97531
Rpl21	0.343847	0.102745	50	0.584949	47.1605
Trim25	0.343609	0	10.3448	0.687218	20.9877
Gfra2	0.343558	0.333118	8.62069	0.353997	6.2963
Megf6	0.34347	0.0802344	5.17241	0.606706	9.1358
Toporsos	0.343449	0	0	0.686898	11.1111
Lrrc8c	0.343094	0.0710931	25.8621	0.615094	25.5556
Ifit3b	0.342842	0	10.3448	0.685684	5.06173
Ogn	0.342816	0.400513	10.3448	0.285119	2.22222
Stom	0.342609	0	18.9655	0.685218	9.75309
ENSMUSG00000109896	0.342077	0.684155	3.44828	0	0
Sepp1	0.342002	0	0	0.684003	61.358
Gm10320	0.342	0	0	0.684001	6.54321
Tbkbp1	0.341687	0.225773	17.2414	0.4576	11.7284
Lats2	0.341533	0.150994	29.3103	0.532073	26.5432
Tspan4	0.341436	0	1.72414	0.682872	14.6914
Samd9l	0.341265	0	5.17241	0.68253	24.6914
Tmem238	0.341228	0	8.62069	0.682456	4.93827
Gm36569	0.34115	0	0	0.6823	0.987654
Tmem140	0.339824	0	0	0.679648	11.7284
Procr	0.339789	0	3.44828	0.679577	1.7284
Ivns1abp	0.339738	0.0814398	22.4138	0.598035	26.2963
Zfp358	0.339287	0	10.3448	0.678573	5.67901
Synm	0.338913	0.0614447	18.9655	0.616382	16.5432
Ankrd37	0.338278	0	0	0.676557	10.3704
Rps27a	0.337773	0.122416	55.1724	0.553131	48.7654
4930557F10Rik	0.337113	0	0	0.674227	2.83951
Ifi35	0.336948	0	12.069	0.673896	25.5556
Foxl2	0.336818	0.673637	10.3448	0	0
Rbms1	0.336754	0.205465	51.7241	0.468043	57.284
Gm8186	0.336683	0	0	0.673367	22.2222
Gm27198	0.336509	0	0	0.673018	0.493827
Utrn	0.33631	0.199005	60.3448	0.473614	77.1605
Ifi47	0.336106	0.672212	13.7931	0	0
Atg4a-ps	0.336069	0	0	0.672138	0.246914
Gpr182	0.335995	0.50052	3.44828	0.17147	1.23457
Pgm5	0.335262	0.0472484	18.9655	0.623275	24.4444
Rplp1	0.334897	0.169756	74.1379	0.500039	39.7531
Nhsl2	0.334693	0.26486	20.6897	0.404526	17.1605
Atf3	0.334351	0	0	0.668703	1.97531
Ifnar1	0.334271	0	17.2414	0.668543	26.5432
Rpl26	0.334088	0.137851	60.3448	0.530325	46.5432
Rin3	0.334034	0	3.44828	0.668068	10.6173
Gm8730	0.33398	0	0	0.66796	17.284
Cdc42ep5	0.33378	0	1.72414	0.66756	3.82716
Ripk3	0.333566	0	0	0.667133	0.617284
Gm10020	0.33351	0	0	0.66702	2.96296
Mafk	0.333467	0	1.72414	0.666934	5.55556
Rpl28	0.333315	0.159831	46.5517	0.506799	31.6049
Cyba	0.332724	0	12.069	0.665448	21.6049
Arpc3	0.33263	0	22.4138	0.665259	37.9012
Pth1r	0.33261	0	15.5172	0.66522	12.716
Sik1	0.33225	0	0	0.6645	6.17284
Oasl1	0.332246	0	0	0.664493	1.60494
Pwwp2b	0.332097	0	5.17241	0.664194	5.55556
1810037I17Rik	0.330848	0	39.6552	0.661696	42.716
Zic3	0.330533	0	17.2414	0.661065	16.5432
Banf1	0.329733	0	25.8621	0.659467	11.7284
Zbtb46	0.32961	0	6.89655	0.659219	23.5802
Foxp1	0.328851	0.225771	53.4483	0.431931	59.3827
Hyal2	0.328319	0	12.069	0.656637	8.02469
Hmgcs2	0.328241	0	18.9655	0.656482	29.8765
Fam63a	0.327974	0	0	0.655948	22.3457
Col4a3bp	0.327835	0	18.9655	0.655671	53.2099
Ccdc85a	0.327384	0.186839	10.3448	0.467928	46.9136
Adgra2	0.326865	0	24.1379	0.65373	18.7654
Gm10076	0.326855	0	0	0.65371	21.6049
2510046G10Rik	0.32674	0	0	0.65348	3.82716
Rps26	0.326345	0.136566	53.4483	0.516123	13.2099
Gm43352	0.325993	0	0	0.651986	0.617284
Hnrnpf	0.325413	0.00964448	41.3793	0.641181	38.5185
Rpl17	0.325297	0.125198	55.1724	0.525396	26.7901
Eif4ebp1	0.324722	0	1.72414	0.649445	3.45679
Xlr	0.324559	0	1.72414	0.649118	2.96296
Junb	0.323748	0.00218531	15.5172	0.64531	11.2346
Sparc	0.323671	0.167171	93.1034	0.48017	68.3951
Actn4	0.323665	0.142386	50	0.504943	33.3333
Ccdc71l	0.323329	0	6.89655	0.646657	4.44444
Adgrl2	0.322634	0	18.9655	0.645267	33.2099
Btg3	0.322584	0	3.44828	0.645168	5.55556
Anpep	0.322558	0.214724	13.7931	0.430392	3.7037
Mmp28	0.32245	0	0	0.6449	10.6173
Gpihbp1	0.322013	0	1.72414	0.644025	0.617284
ENSMUSG00000081946	0.3219	0.643801	3.44828	0	0
Pfn1	0.321572	0	18.9655	0.643144	51.1111
Krtap28-13	0.321561	0	0	0.643123	0.740741
Gnai2	0.321115	0	70.6897	0.64223	52.716
Psmb10	0.320954	0	6.89655	0.641907	19.3827
ENSMUSG00000115284	0.320919	0.641838	3.44828	0	0
Psmb9	0.320662	0	1.72414	0.641324	7.28395
H2-Q6	0.320625	0	0	0.64125	1.11111
Mmp25	0.320267	0	12.069	0.640534	0.617284
Map3k7cl	0.32005	0	0	0.640099	0.987654
A4galt	0.320012	0	3.44828	0.640025	24.321
Rpl36a	0.319563	0.206797	48.2759	0.432329	3.08642
Esyt2	0.31945	0.0395072	37.931	0.599393	53.4568
Rps18-ps3	0.319145	0	0	0.63829	23.7037
Serpinh1	0.319076	0	39.6552	0.638151	29.7531
Gm2000	0.318972	0	0	0.637944	39.1358
Gpr146	0.318679	0	17.2414	0.637358	16.4198
Ctnnd1	0.318566	0	25.8621	0.637131	14.1975
Gm28053	0.318383	0	0	0.636765	1.48148
ENSMUSG00000063286	0.318368	0.636736	5.17241	0	0
Alpl	0.318293	0	6.89655	0.636586	11.9753
Tor4a	0.318163	0	1.72414	0.636326	1.60494
Fbxl14	0.317687	0	6.89655	0.635374	6.04938
Sbspon	0.317506	0	0	0.635013	2.96296
Nid2	0.31745	0.0034965	5.17241	0.631404	8.2716
Nr2f2	0.317076	0.238291	34.4828	0.395862	16.6667
Gm10116	0.317066	0	0	0.634132	8.76543
Cmpk2	0.317016	0.0980948	8.62069	0.535936	4.32099
Lyar	0.316989	0	6.89655	0.633977	8.76543
Pydc4	0.31688	0	0	0.63376	0.740741
Ppic	0.316766	0	6.89655	0.633532	5.4321
Rps24	0.316749	0.143835	67.2414	0.489663	33.7037
Ddc	0.316633	0	13.7931	0.633267	24.8148
Lama4	0.31653	0	6.89655	0.633059	21.2346
Aldh1a3	0.316176	0	0	0.632352	0.987654
G6pc	0.316086	0	0	0.632173	0.493827
Chrna1os	0.31584	0.631681	3.44828	0	0.37037
LOC102638047	0.315828	0.631656	3.44828	0	0
Smim11	0.315796	0	5.17241	0.631592	16.6667
Bhmt2	0.315748	0	0	0.631496	0.864198
Klhl6	0.31571	0	0	0.631419	8.51852
Gimap1	0.315448	0.630895	3.44828	0	0
Gm20756	0.31535	0	0	0.6307	5.4321
Lcn2	0.315294	0.630588	13.7931	0	0.123457
Rbpms	0.315217	0.0636928	25.8621	0.566742	38.7654
Trpc3	0.315049	0	8.62069	0.630098	20.4938
Zfp820	0.314986	0	0	0.629973	2.34568
Mtus1	0.314685	0.0758466	24.1379	0.553523	40.6173
Plat	0.314277	0	41.3793	0.628555	30.9877
Dpp4	0.314259	0	6.89655	0.628519	6.79012
H3f3a	0.314256	0	0	0.628513	44.321
Tcim	0.314222	0.628444	5.17241	0	0
Rpl19	0.314045	0.128939	50	0.499151	45.8025
Maoa	0.313778	0	36.2069	0.627557	39.5062
Oasl2	0.313536	0	12.069	0.627073	14.5679
Gm26863	0.313375	0	0	0.626749	1.11111
Akip1	0.313362	0	6.89655	0.626723	5.06173
Emp2	0.31329	0	25.8621	0.62658	18.5185
Rcsd1	0.313284	0	6.89655	0.626567	16.4198
Cd74	0.312858	0.36068	15.5172	0.265036	2.22222
H3f3b	0.312669	0.028177	70.6897	0.59716	67.4074
Tmem51	0.311986	0	5.17241	0.623972	10.6173
Osgin1	0.311935	0	0	0.62387	1.35802
Cstb	0.311883	0	12.069	0.623767	23.2099
Pla2g4a	0.31175	0.417564	8.62069	0.205937	13.3333
Rpl10a	0.311624	0.185075	46.5517	0.438173	26.1728
Ppp1r14a	0.311324	0.469054	6.89655	0.153594	13.0864
Gm10269	0.311318	0	0	0.622635	1.97531
Jcad	0.311295	0.622591	50	0	0
Slc16a1	0.311026	0	27.5862	0.622052	23.7037
Rpl39l	0.310769	0	0	0.621539	0.493827
ENSMUSG00000085382	0.310556	0.621112	3.44828	0	0
Pomc	0.310455	0	5.17241	0.62091	5.4321
Swap70	0.310401	0	12.069	0.620801	18.7654
Mxra7	0.310362	0	18.9655	0.620723	18.7654
Psme1	0.310191	0	24.1379	0.620382	16.5432
Rapgef4	0.310003	0	12.069	0.620007	58.2716
Rpl11	0.309442	0.109187	56.8966	0.509698	25.0617
Cmtm6	0.309382	0	25.8621	0.618764	11.7284
Rpl13-ps3	0.308952	0	0	0.617903	51.7284
Dusp7	0.308935	0	10.3448	0.61787	7.90123
Ptma	0.308833	0	67.2414	0.617666	66.2963
Pcdh1	0.308705	0	13.7931	0.61741	15.9259
Sri	0.308683	0	32.7586	0.617365	28.8889
Uqcc3	0.308314	0	5.17241	0.616627	16.9136
Grb14	0.308191	0.159359	17.2414	0.457023	34.8148
Gm13470	0.308047	0	0	0.616095	2.96296
Serf2	0.307852	0	25.8621	0.615704	57.1605
Rab3d	0.307833	0	5.17241	0.615666	3.82716
Gm28140	0.307645	0	0	0.61529	0.37037
Mob1a	0.307633	0	20.6897	0.615266	11.358
Sh3pxd2a	0.30758	0.3042	18.9655	0.31096	8.02469
Rpl30	0.307045	0.230977	67.2414	0.383112	4.5679
Nxpe4	0.306937	0	27.5862	0.613874	28.642
Fam101b	0.306768	0	0	0.613536	17.7778
Mustn1	0.306464	0	5.17241	0.612929	2.59259
Gstm2	0.306337	0	5.17241	0.612674	3.33333
Fzd4	0.305995	0	48.2759	0.611989	13.4568
Anxa2	0.305993	0.0260383	37.931	0.585947	27.284
Rpl15	0.305956	0.176082	44.8276	0.435831	6.79012
6030445D17Rik	0.305871	0	0	0.611742	0.864198
Ndufa7	0.305548	0	32.7586	0.611097	46.5432
Cdc42se1	0.305369	0	17.2414	0.610737	10.9877
Lmna	0.305186	0.105449	15.5172	0.504923	16.6667
Cd151	0.304949	0	39.6552	0.609898	20.4938
Rps13	0.304905	0.154014	44.8276	0.455795	8.88889
Ost4	0.304813	0	10.3448	0.609625	17.5309
Rnaseh2c	0.304577	0	6.89655	0.609154	13.8272
Msn	0.304552	0	46.5517	0.609104	38.0247
Sec61b	0.304467	0	15.5172	0.608934	19.5062
Dgkh	0.304444	0	12.069	0.608888	28.5185
H1f0	0.304301	0	31.0345	0.608601	17.1605
Gltscr2	0.304136	0	0	0.608271	14.9383
Sh3bgrl3	0.304099	0	10.3448	0.608197	32.8395
Prkcdbp	0.304013	0	0	0.608025	13.5802
D8Ertd738e	0.304002	0	18.9655	0.608004	34.6914
Clic1	0.303823	0	31.0345	0.607645	32.5926
Gm9844	0.303821	0	0	0.607641	18.8889
St8sia6	0.303812	0	10.3448	0.607625	9.75309
Nedd9	0.303799	0.073258	18.9655	0.53434	23.8272
Slc16a2	0.303746	0	48.2759	0.607493	52.8395
Fosl1	0.303696	0.236727	8.62069	0.370665	2.46914
Ftl1	0.303534	0	27.5862	0.607067	73.2099
Axin2	0.303524	0	8.62069	0.607049	11.9753
Pde5a	0.303354	0	10.3448	0.606708	14.6914
Gstt2	0.302906	0	5.17241	0.605813	14.8148
Arhgap27	0.302775	0	6.89655	0.60555	7.53086
4931406P16Rik	0.302579	0	5.17241	0.605158	52.5926
Arhgdia	0.30253	0	32.7586	0.605061	35.0617
Gbe1	0.302398	0	17.2414	0.604797	32.4691
Epb41	0.302396	0.254735	17.2414	0.350058	22.2222
Gm11131	0.302182	0	0	0.604364	0.617284
Mecomos	0.302152	0	0	0.604304	1.11111
2900026A02Rik	0.301974	0	15.5172	0.603948	15.8025
Irak3	0.301754	0.479124	6.89655	0.124383	2.22222
Rpl36-ps3	0.301695	0	0	0.603391	18.8889
Snx3	0.301471	0	51.7241	0.602943	40
Trim56	0.301249	0	8.62069	0.602499	10.3704
Rbm20	0.300995	0	8.62069	0.601991	15.8025
Gm11808	0.300958	0	0	0.601917	44.6914
Flrt2	0.300854	0.324014	12.069	0.277694	16.7901
Gprc5c	0.300702	0	8.62069	0.601403	8.51852
Itpr3	0.300643	0	6.89655	0.601286	8.02469
Gpcpd1	0.300509	0	34.4828	0.601019	84.9383
Arhgef3	0.300491	0	41.3793	0.600981	33.8272
Tpm1	0.300415	0.0823688	25.8621	0.518461	29.2593
Ppdpf	0.300402	0	18.9655	0.600803	19.7531
Sp140	0.30031	0.277865	1.72414	0.322755	2.09877
Jup	0.30029	0	32.7586	0.60058	18.5185
Rbm8a	0.300089	0	20.6897	0.600177	26.0494
Rpl27-ps3	0.30003	0	0	0.600061	41.4815
ENSMUSG00000082061	0.300027	0.600054	1.72414	0	0
ENSMUSG00000085269	0.300027	0.600054	1.72414	0	0
Shisa5	0.300023	0	24.1379	0.600046	24.9383
Nod1	0.299982	0	10.3448	0.599963	11.7284
Bok	0.299651	0.02511	8.62069	0.574193	10.3704
Rps12-ps3	0.299584	0	0	0.599168	11.358
Caskin2	0.299513	0	12.069	0.599027	14.321
Dkk2	0.299449	0.240822	5.17241	0.358076	1.7284
Ccnd2	0.299293	0.0416423	29.3103	0.556943	13.4568
Ifi203	0.299195	0.59839	13.7931	0	0
Elk4	0.299171	0	8.62069	0.598343	19.1358
Nsmce1	0.298831	0	15.5172	0.597662	11.6049
Sptssa	0.298764	0	25.8621	0.597527	22.3457
Sgms2	0.298234	0	10.3448	0.596468	18.7654
Tnfrsf19	0.298224	0	29.3103	0.596449	25.4321
Myo1c	0.297772	0	13.7931	0.595543	13.3333
Nr1d1	0.297749	0	24.1379	0.595497	20.7407
Btg2	0.297643	0.00397126	25.8621	0.591314	12.0988
Syf2	0.297545	0	17.2414	0.59509	24.1975
Cp	0.297438	0.181037	34.4828	0.413838	28.5185
Kcnk6	0.297292	0.356009	3.44828	0.238575	1.23457
Xaf1	0.297273	0	6.89655	0.594546	14.1975
Gm26982	0.296863	0	0	0.593727	1.23457
ENSMUSG00000095457	0.296571	0.593143	5.17241	0	0
Cbr2	0.296479	0.592957	6.89655	0	0.246914
Gm5	0.296376	0	0	0.592751	1.23457
Mfap2	0.296311	0.592623	3.44828	0	2.09877
Il2rg	0.296311	0.592621	10.3448	0	0
Cdkn1c	0.296165	0	3.44828	0.59233	5.30864
Rab8a	0.296129	0	13.7931	0.592258	8.76543
Ano1	0.295995	0	17.2414	0.59199	11.2346
Stra13	0.295875	0	0	0.59175	15.0617
Gm9843	0.295762	0	0	0.591525	59.7531
Txndc17	0.295745	0	20.6897	0.591491	18.642
Ctdsp1	0.295504	0	3.44828	0.591008	15.0617
Tnks1bp1	0.295389	0	15.5172	0.590778	11.1111
Arpp19	0.295364	0	27.5862	0.590728	34.4444
Mis18a	0.295287	0	6.89655	0.590575	3.95062
Spry1	0.295233	0	5.17241	0.590466	4.69136
Heg1	0.295083	0.0230209	44.8276	0.567146	60.9877
Naa38	0.295058	0	3.44828	0.590116	16.5432
Fam43a	0.294976	0	3.44828	0.589953	8.64198
Foxf1	0.294937	0.589873	5.17241	0	0
Pdxk	0.294742	0	5.17241	0.589484	24.8148
Baiap2l1	0.294629	0	1.72414	0.589258	8.64198
Mapk12	0.294588	0	0	0.589175	8.39506
Leprot	0.294551	0	24.1379	0.589101	18.5185
Sypl	0.294465	0	36.2069	0.58893	32.2222
Tmod3	0.294372	0.18745	34.4828	0.401293	29.7531
Snrpg	0.29432	0	22.4138	0.58864	15.3086
Eif3f	0.294268	0	27.5862	0.588536	20.8642
Gm26510	0.294108	0	0	0.588215	11.1111
Rpl13a	0.294013	0	12.069	0.588027	36.4198
Cltb	0.294007	0.193371	39.6552	0.394642	25.1852
Cetn2	0.293788	0	22.4138	0.587575	13.7037
Gm9493	0.293786	0	0	0.587572	26.4198
Eif3e	0.293595	0	22.4138	0.587191	19.5062
Anxa5	0.293517	0	48.2759	0.587035	34.9383
Map3k1	0.293357	0	15.5172	0.586715	19.7531
Gm10036	0.293131	0	0	0.586263	37.4074
Ldlrad3	0.292878	0.0606965	31.0345	0.52506	39.7531
Uqcc2	0.292536	0	10.3448	0.585072	28.8889
Itih5	0.292319	0	55.1724	0.584638	55.3086
Eef2	0.292299	0.115566	68.9655	0.469032	42.3457
Spc25	0.292195	0	1.72414	0.584391	0.864198
Trip10	0.292005	0	6.89655	0.58401	5.92593
Hadh	0.292002	0	29.3103	0.584004	9.87654
Arl2bp	0.291678	0	37.931	0.583356	29.8765
F11r	0.291664	0.0329516	27.5862	0.550376	17.6543
Shfm1	0.291615	0	0	0.58323	43.4568
Notch1	0.291345	0	1.72414	0.582691	27.284
Jun	0.291343	0	27.5862	0.582686	20.7407
S1pr1	0.291248	0	58.6207	0.582495	32.2222
Plvap	0.291186	0.582371	25.8621	0	1.23457
Mfhas1	0.291148	0	22.4138	0.582295	31.9753
Bag5	0.291146	0	12.069	0.582292	9.75309
Rpl37	0.290892	0	27.5862	0.581783	49.2593
Extl3	0.290851	0	29.3103	0.581702	38.1481
Cdc34b	0.290788	0	0	0.581575	0.246914
Gm26870	0.290787	0	0	0.581575	3.7037
Reep3	0.290466	0.152871	56.8966	0.42806	34.6914
Cxx1b	0.290436	0	0	0.580872	21.2346
Fbln2	0.290411	0.364248	3.44828	0.216575	2.34568
Gm37401	0.290409	0	0	0.580818	6.91358
Pop5	0.290387	0	13.7931	0.580775	21.8519
Nrep	0.290362	0	22.4138	0.580724	10
Gm17322	0.290323	0	0	0.580646	0.246914
Hmg20b	0.290283	0	10.3448	0.580565	23.3333
Ctnnbip1	0.290207	0.132403	20.6897	0.448011	15.0617
Plekhf2	0.289966	0.0404534	5.17241	0.539478	5.92593
Faim	0.289927	0	8.62069	0.579854	15.0617
Chmp2a	0.289804	0	15.5172	0.579607	26.6667
Gm33206	0.289528	0	0	0.579055	1.7284
Tpm3	0.289457	0.204205	43.1034	0.37471	27.037
Ech1	0.289321	0	17.2414	0.578642	26.9136
Dubr	0.289232	0	0	0.578464	8.88889
Ppp1r2	0.289134	0	39.6552	0.578268	34.1975
Hnrnpa0	0.289131	0	37.931	0.578262	12.4691
Gnb2l1	0.288982	0	0	0.577965	22.2222
Bmp4	0.288952	0.325356	5.17241	0.252549	2.71605
Rnaset2b	0.288742	0	25.8621	0.577484	12.963
Gm10825	0.288698	0	0	0.577397	0.246914
Luzp1	0.288677	0.102339	22.4138	0.475016	49.1358
Gstm7	0.288637	0	12.069	0.577275	8.2716
BC107364	0.288575	0	0	0.57715	0.246914
Snrpb	0.2885	0	29.3103	0.576999	26.5432
Spr	0.288482	0	13.7931	0.576963	17.1605
Pttg1ip	0.288302	0	55.1724	0.576605	20.1235
Ccl3	0.288267	0.576535	1.72414	0	0
ENSMUSG00000081613	0.288267	0.576535	1.72414	0	0
ENSMUSG00000086591	0.288267	0.576535	1.72414	0	0
Irf2bpl	0.288235	0	31.0345	0.576471	19.0123
Tbrg1	0.288231	0	3.44828	0.576461	13.8272
Gm10263	0.288171	0	0	0.576343	30.7407
Rpl23a-ps3	0.288	0	0	0.576001	19.2593
Tnfrsf25	0.287838	0	0	0.575676	2.71605
Fam32a	0.287804	0	15.5172	0.575609	17.1605
Bnip3l	0.287749	0	50	0.575499	35.8025
Npr1	0.28769	0	6.89655	0.57538	4.93827
Hbegf	0.287554	0	6.89655	0.575107	8.2716
Tapbp	0.287484	0	25.8621	0.574968	19.7531
Nbl1	0.287452	0	44.8276	0.574904	15.4321
F730311O21Rik	0.28743	0	0	0.57486	0.246914
Slc52a2	0.287341	0	3.44828	0.574683	9.25926
Eif3g	0.287178	0	6.89655	0.574355	16.7901
Rps15	0.287032	0	43.1034	0.574063	53.5802
Uqcrb	0.286968	0	25.8621	0.573935	42.3457
Lsm2	0.286871	0	5.17241	0.573742	8.64198
Ubald2	0.286802	0	13.7931	0.573603	16.5432
Ttc32	0.286698	0	3.44828	0.573395	5.92593
Ccn2	0.286623	0.573246	25.8621	0	0
Hbb-bs	0.286455	0	0	0.57291	17.5309
Gltp	0.286361	0	17.2414	0.572722	15.4321
Sdcbp	0.286336	0	37.931	0.572672	24.0741
Rhoa	0.286327	0	39.6552	0.572654	42.716
Rpl9-ps6	0.286223	0	0	0.572445	51.6049
Tln1	0.285994	0	20.6897	0.571988	19.0123
Zfp36l1	0.285826	0	37.931	0.571652	38.7654
Hmgb1	0.285793	0	31.0345	0.571587	43.0864
Lmntd1	0.285757	0	3.44828	0.571514	26.6667
C1s1	0.285642	0	5.17241	0.571283	1.23457
Nxpe2	0.285639	0	0	0.571278	20.2469
Pqlc1	0.285567	0.00590035	5.17241	0.565234	10.6173
Ccny	0.285555	0.146745	24.1379	0.424366	34.6914
Vasp	0.285456	0.0287536	13.7931	0.542159	15.1852
Pls3	0.285398	0	39.6552	0.570797	40.8642
Ybx1	0.28534	0.0139939	44.8276	0.556686	27.037
Vamp5	0.285095	0	3.44828	0.57019	20
Gm10073	0.284772	0	0	0.569544	27.284
Sod1	0.284724	0	41.3793	0.569448	28.3951
Dpm3	0.28445	0	5.17241	0.568901	27.6543
Ptbp1	0.284294	0	0	0.568587	14.6914
Rcn3	0.284174	0	10.3448	0.568348	5.18519
Tnfaip8l1	0.284136	0	5.17241	0.568272	3.58025
Lurap1l	0.283749	0.296574	8.62069	0.270924	5.67901
Scube2	0.283635	0	3.44828	0.56727	2.71605
Rassf9	0.283561	0.0495686	6.89655	0.517552	23.3333
Gm14154	0.283335	0	0	0.566669	0.246914
Anp32a	0.283258	0	34.4828	0.566516	34.0741
Rpl6l	0.283013	0	0	0.566026	32.716
Plscr4	0.282847	0	17.2414	0.565694	34.4444
Lrp8	0.282814	0	18.9655	0.565628	16.9136
Irf9	0.28269	0	20.6897	0.565379	10.3704
Samhd1	0.282367	0.110265	22.4138	0.454468	19.0123
Wwtr1	0.282217	0.080091	29.3103	0.484342	39.3827
Rab11a	0.282188	0	31.0345	0.564376	34.1975
Cdc37	0.282034	0	6.89655	0.564067	20.8642
Adamts1	0.281959	0	12.069	0.563919	7.77778
Jam2	0.281877	0.00661876	50	0.557136	33.4568
Dazap2	0.281754	0	44.8276	0.563509	20.2469
Ufm1	0.281739	0	12.069	0.563478	10
Hnrnpab	0.281698	0	8.62069	0.563396	10.1235
Aldh2	0.281696	0	44.8276	0.563393	34.5679
Cggbp1	0.281654	0	13.7931	0.563307	10.7407
Anp32b	0.281589	0	6.89655	0.563178	12.963
Dusp23	0.281296	0	6.89655	0.562593	7.90123
Apol9b	0.281253	0	0	0.562506	0.617284
Gm10094	0.281197	0	0	0.562394	9.25926
Rpsa	0.281166	0	48.2759	0.562331	33.4568
Sumf1	0.280953	0	10.3448	0.561906	40.8642
Smpdl3a	0.280948	0	24.1379	0.561896	15.679
Cdc42ep4	0.280729	0	48.2759	0.561458	15.3086
RP24-240G4.4	0.280598	0	0	0.561197	0.246914
Tnfrsf26	0.280562	0.561124	1.72414	0	0.123457
Ifnar2	0.280477	0	15.5172	0.560954	20.1235
mt-Nd2	0.280449	0	0	0.560898	27.7778
Pde8a	0.280445	0.526616	18.9655	0.0342743	19.0123
Blvrb	0.280272	0	0	0.560544	11.6049
Naca	0.280183	0	34.4828	0.560365	26.7901
ENSMUSG00000031510	0.280115	0.560231	1.72414	0	0
ENSMUSG00000092563	0.280115	0.560231	1.72414	0	0
Nudt14	0.280087	0	3.44828	0.560174	4.69136
Pon2	0.279908	0	22.4138	0.559816	26.0494
Dhx58	0.279821	0	0	0.559642	2.46914
Capn12	0.279754	0	0	0.559508	0.617284
Slc9a2	0.2793	0	3.44828	0.5586	5.55556
Ppm1f	0.279174	0	6.89655	0.558348	15.1852
Rps10	0.278981	0	44.8276	0.557963	21.2346
Cish	0.278921	0	1.72414	0.557843	1.48148
Ddx54	0.278862	0	0	0.557723	8.88889
Cox7a2l	0.278712	0.138003	46.5517	0.419421	24.321
Dap	0.278391	0	10.3448	0.556782	7.90123
Slc3a2	0.278378	0	58.6207	0.556755	49.0123
Map4k2	0.278257	0	12.069	0.556515	24.0741
Mrpl17	0.278195	0	15.5172	0.556391	14.1975
Fam219b	0.278194	0	5.17241	0.556389	8.76543
Rgs16	0.278057	0	1.72414	0.556114	1.35802
2610305D13Rik	0.277937	0	0	0.555873	2.96296
Hgfac	0.277886	0	0	0.555772	0.246914
Bmi1	0.277871	0	8.62069	0.555743	7.03704
Snrpd2	0.277856	0	15.5172	0.555713	24.4444
Hipk3	0.277735	0	24.1379	0.55547	25.9259
Mbl1	0.277615	0.55523	1.72414	0	0
ENSMUSG00000095193	0.277615	0.55523	1.72414	0	0
Slc31a1	0.277586	0	22.4138	0.555172	21.6049
Gstm1	0.27735	0	50	0.5547	33.3333
Bmpr2	0.27732	0	48.2759	0.554639	53.5802
Adipor1	0.277258	0	29.3103	0.554515	20.4938
Hpse	0.277171	0.554342	5.17241	0	0
Sf3b5	0.276981	0	5.17241	0.553962	14.321
Mknk2	0.276739	0	12.069	0.553477	8.14815
Gm14820	0.276409	0	0	0.552817	13.9506
Calm1	0.276352	0.108737	86.2069	0.443966	72.963
1810058I24Rik	0.276328	0	20.6897	0.552656	15.0617
Arpc5	0.276235	0	31.0345	0.55247	20.4938
Rpl14	0.27622	0	41.3793	0.552441	57.1605
Ppp1r16b	0.276191	0.537826	17.2414	0.0145556	26.6667
Hbb-b1	0.27619	0.55238	17.2414	0	0
Rpp25l	0.276038	0	5.17241	0.552076	8.51852
ENSMUSG00000113527	0.275979	0.551959	1.72414	0	0
Klf10	0.27594	0	3.44828	0.55188	8.39506
Ppp1ca	0.275622	0	17.2414	0.551243	26.1728
Rpl32	0.275612	0	34.4828	0.551224	43.4568
Atp5e	0.275533	0	15.5172	0.551065	33.5802
Gm16070	0.27531	0	1.72414	0.55062	4.19753
Smad6	0.275267	0	1.72414	0.550535	9.38272
Gm20631	0.275146	0	0	0.550292	1.60494
Znrd1	0.275075	0	12.069	0.55015	10.1235
Sept9	0.274952	0	6.89655	0.549904	10.3704
Marveld2	0.274669	0	0	0.549338	1.97531
Psma7	0.274614	0	25.8621	0.549227	36.5432
Gm684	0.27454	0	0	0.549081	2.09877
Ceacam2	0.274481	0.548963	18.9655	0	1.23457
Aif1l	0.274448	0	12.069	0.548896	7.90123
Fbxo6	0.274322	0	10.3448	0.548644	8.39506
Tcaf2	0.274175	0	1.72414	0.548351	2.34568
Eif4g2	0.274107	0	63.7931	0.548214	34.9383
Fkbp1a	0.273992	0.0141831	43.1034	0.533801	41.7284
Cyth3	0.273881	0	20.6897	0.547761	28.0247
Rbm42	0.2737	0	0	0.5474	16.9136
Copz2	0.273693	0	1.72414	0.547386	12.3457
Tcf7	0.273613	0	5.17241	0.547226	1.48148
Unc13b	0.273611	0	13.7931	0.547222	27.284
Skil	0.273525	0.204716	12.069	0.342335	12.2222
Fmo1	0.273454	0	8.62069	0.546907	7.40741
Tmem160	0.273419	0	6.89655	0.546838	11.4815
Hdac7	0.273415	0	15.5172	0.54683	22.3457
Svil	0.273358	0.355372	20.6897	0.191344	19.8765
Rpl31	0.273314	0	48.2759	0.546627	9.01235
Ubl5	0.273311	0	22.4138	0.546623	29.1358
Purb	0.272825	0.0242815	53.4483	0.521369	21.1111
Klk8	0.272675	0	0	0.54535	1.85185
Srsf9	0.272536	0	20.6897	0.545073	11.8519
Actb	0.272465	0.114977	94.8276	0.429953	82.4691
Rab5c	0.27238	0	44.8276	0.54476	24.1975
Gpx8	0.272342	0	15.5172	0.544684	10
Abhd17a	0.272308	0	20.6897	0.544617	16.0494
ENSMUSG00000112756	0.271867	0.543733	1.72414	0	0
Casp8	0.271857	0	3.44828	0.543714	11.1111
Mkl2	0.271839	0	0	0.543677	43.7037
Hist1h2bc	0.27181	0	0	0.543621	20
1810043H04Rik	0.271658	0	0	0.543316	12.3457
Agpat2	0.271441	0	1.72414	0.542882	2.09877
Ptms	0.27133	0	48.2759	0.542659	21.358
Itga6	0.271002	0.0113464	46.5517	0.530657	47.4074
Inf2	0.270987	0.312935	15.5172	0.229039	17.5309
Pole3	0.270618	0	6.89655	0.541237	5.80247
S100a1	0.270613	0	22.4138	0.541225	18.642
Gemin7	0.270585	0	8.62069	0.541169	15.8025
Rpl24	0.270463	0	12.069	0.540927	41.1111
Alad	0.270461	0	3.44828	0.540922	11.7284
Bcl10	0.270415	0	12.069	0.54083	6.2963
Ifih1	0.270414	0	5.17241	0.540828	10.1235
Ica1	0.270363	0	5.17241	0.540726	27.4074
Vmn1r21	0.270304	0.540607	1.72414	0	0
Ifi207	0.270304	0.540607	1.72414	0	0
ENSMUSG00000085293	0.270304	0.540607	1.72414	0	0
Rnaset2a	0.270105	0	34.4828	0.540209	10.1235
1110059G10Rik	0.270102	0	12.069	0.540203	7.65432
Psma6	0.270049	0	46.5517	0.540098	24.5679
Lrg1	0.269766	0.539532	6.89655	0	0
Gabarap	0.269674	0	29.3103	0.539348	32.0988
Cobll1	0.269495	0	27.5862	0.538989	59.7531
Txn1	0.269332	0.0299005	39.6552	0.508764	27.1605
S100a16	0.26907	0	31.0345	0.53814	29.1358
2700060E02Rik	0.269048	0	0	0.538096	19.3827
Prkg1	0.269045	0.0244626	10.3448	0.513628	72.3457
Hes1	0.268968	0	20.6897	0.537937	27.037
Eif3k	0.268924	0	17.2414	0.537847	22.3457
Psmb3	0.268658	0	15.5172	0.537317	17.7778
Lamb1	0.268655	0	8.62069	0.537311	2.83951
Cflar	0.268584	0.179558	27.5862	0.35761	20.1235
Tmem167b	0.268421	0	0	0.536841	6.41975
Lrrc32	0.268387	0	3.44828	0.536774	2.46914
Tprgl	0.268258	0	39.6552	0.536515	21.6049
Ptk6	0.26808	0.536159	1.72414	0	0.123457
4930433B08Rik	0.26808	0.536159	1.72414	0	0
Spon2	0.26808	0.536159	1.72414	0	0
Ntf3	0.26808	0.536159	1.72414	0	0.617284
9230020A06Rik	0.26808	0.536159	1.72414	0	0
ENSMUSG00000104351	0.26808	0.536159	1.72414	0	0
ENSMUSG00000108057	0.26808	0.536159	1.72414	0	0
ENSMUSG00000110141	0.26808	0.536159	1.72414	0	0
Rps26-ps1	0.26801	0	0	0.53602	20.3704
Sepw1	0.267936	0	0	0.535871	51.6049
Tiam1	0.267802	0	37.931	0.535604	14.321
Zfp422	0.267671	0	13.7931	0.535343	8.2716
Pim3	0.267654	0	15.5172	0.535308	13.5802
Rfk	0.267291	0.0584901	27.5862	0.476093	6.54321
Cast	0.267212	0.0695135	20.6897	0.464911	15.3086
Jund	0.267155	0	32.7586	0.534311	24.9383
Zfp706	0.267143	0	39.6552	0.534286	19.8765
Alyref	0.267114	0	3.44828	0.534227	5.80247
Pcbp1	0.26705	0	39.6552	0.5341	14.0741
Lsm8	0.266766	0	6.89655	0.533532	7.65432
Dctpp1	0.266693	0	0	0.533387	4.44444
Chmp5	0.266528	0	18.9655	0.533057	22.963
Pfdn5	0.266521	0	17.2414	0.533041	38.0247
Rac1	0.266493	0	17.2414	0.532986	27.7778
Ethe1	0.266486	0.222375	8.62069	0.310596	6.17284
Parp14	0.266457	0	5.17241	0.532914	8.02469
Lpar6	0.266355	0	1.72414	0.53271	13.4568
Palm	0.26628	0	20.6897	0.53256	28.8889
Smdt1	0.266073	0	44.8276	0.532146	36.2963
Fgf13	0.266042	0	6.89655	0.532085	33.9506
Dipk2b	0.265791	0.531583	6.89655	0	0
Tmem45a	0.265774	0	5.17241	0.531549	5.92593
Nmi	0.265768	0	5.17241	0.531537	11.6049
Btf3	0.265694	0	22.4138	0.531387	7.16049
Bud31	0.265642	0	5.17241	0.531284	12.2222
Nlrc4	0.265447	0	5.17241	0.530894	35.0617
Afap1l2	0.265429	0	10.3448	0.530857	24.5679
Mad2l1bp	0.26535	0	1.72414	0.530699	3.20988
Saysd1	0.265284	0	6.89655	0.530569	10.3704
Psmc3	0.265216	0	18.9655	0.530432	22.716
Ltbr	0.265128	0	5.17241	0.530255	5.55556
Phlda1	0.265126	0.273047	15.5172	0.257204	10.6173
Grap2	0.264733	0.529466	1.72414	0	0
Zbtb11os1	0.264521	0	1.72414	0.529042	1.97531
Rapgef4os1	0.264362	0	0	0.528723	19.8765
Trim6	0.26435	0	1.72414	0.528699	2.71605
Fam118a	0.264316	0	10.3448	0.528632	10.1235
Rbms2	0.264048	0	10.3448	0.528096	27.1605
Ndufs6	0.264047	0	22.4138	0.528093	25.0617
Nol7	0.263902	0	15.5172	0.527803	14.9383
Sh3bgrl	0.263796	0	37.931	0.527592	31.4815
2610001J05Rik	0.263785	0	8.62069	0.527571	17.5309
Sumo3	0.26378	0	24.1379	0.527559	18.642
Atp6v1g1	0.263772	0	13.7931	0.527544	33.0864
Pcna	0.263606	0	22.4138	0.527213	6.2963
Irf2bp2	0.263525	0	13.7931	0.52705	17.037
Lysmd3	0.263358	0	3.44828	0.526715	6.04938
Nanos1	0.263341	0	5.17241	0.526683	3.82716
Mrps24	0.263337	0	12.069	0.526674	16.9136
mt-Co2	0.263144	0	0	0.526287	60.9877
Dynll1	0.263118	0	48.2759	0.526236	60.3704
G0s2	0.263017	0.343163	12.069	0.182871	6.66667
ENSMUSG00000100557	0.262943	0.525886	1.72414	0	0
Tm6sf2	0.26293	0.525861	1.72414	0	0.987654
ENSMUSG00000081937	0.26293	0.525861	1.72414	0	0
ENSMUSG00000087057	0.26293	0.525861	1.72414	0	0
Angptl4	0.262899	0	5.17241	0.525798	4.07407
Commd5	0.262614	0	3.44828	0.525228	4.5679
Gm4950	0.262512	0	0	0.525025	13.7037
Cfl1	0.262429	0	67.2414	0.524857	48.5185
Uqcr11	0.262368	0	18.9655	0.524736	40.7407
Anapc13	0.262309	0	8.62069	0.524619	18.642
Pdcl3	0.261951	0	12.069	0.523902	13.0864
Taf1c	0.26193	0	5.17241	0.52386	27.037
Ankrd13a	0.261772	0.300757	32.7586	0.222788	14.1975
Rpl41	0.261654	0.0283661	60.3448	0.494941	79.6296
Ldha	0.261551	0	18.9655	0.523101	27.284
Mansc1	0.261361	0	6.89655	0.522723	2.22222
Lax1	0.261337	0.522674	1.72414	0	0.123457
Lexm	0.261337	0.522674	1.72414	0	0.37037
ENSMUSG00000081201	0.261337	0.522674	1.72414	0	0
ENSMUSG00000089286	0.261337	0.522674	1.72414	0	0
ENSMUSG00000096992	0.261337	0.522674	1.72414	0	0
ENSMUSG00000109574	0.261337	0.522674	1.72414	0	0
Rab18	0.261311	0	32.7586	0.522623	26.6667
Ctsw	0.261219	0.522438	1.72414	0	0.123457
ENSMUSG00000082706	0.261219	0.522438	1.72414	0	0
Ankrd33b	0.261081	0	5.17241	0.522162	6.79012
Eef1d	0.261052	0	13.7931	0.522104	17.5309
Rgs3	0.260958	0	12.069	0.521916	18.8889
ENSMUSG00000025922	0.260956	0.521911	3.44828	0	0
ENSMUSG00000115410	0.260825	0.52165	1.72414	0	0
Gm44148	0.260825	0	0	0.52165	15.1852
Polr2j	0.260736	0	8.62069	0.521472	13.8272
Wdr1	0.260592	0	24.1379	0.521184	15.679
Ptpn7	0.260543	0.521087	1.72414	0	0
Nab1	0.26054	0	15.5172	0.521081	14.8148
Lsm10	0.260493	0	1.72414	0.520986	5.92593
Tnfrsf1a	0.260489	0	22.4138	0.520978	8.76543
Nomo1	0.260389	0	24.1379	0.520777	14.1975
Ccdc125	0.260236	0	5.17241	0.520472	3.82716
Pagr1a	0.259822	0.519643	1.72414	0	0
Htra4	0.259822	0.519643	1.72414	0	0
ENSMUSG00000094257	0.259822	0.519643	1.72414	0	0
ENSMUSG00000080955	0.259822	0.519643	1.72414	0	0
Chtf8	0.259562	0	8.62069	0.519123	8.88889
Tnfrsf13b	0.259522	0.519043	1.72414	0	0.123457
Olfr556	0.259522	0.519043	1.72414	0	0
Marveld3	0.259522	0.519043	1.72414	0	0
Olfr403	0.259522	0.519043	1.72414	0	0
ENSMUSG00000082576	0.259522	0.519043	1.72414	0	0
ENSMUSG00000084373	0.259522	0.519043	1.72414	0	0
ENSMUSG00000103204	0.259522	0.519043	1.72414	0	0
ENSMUSG00000114886	0.259522	0.519043	1.72414	0	0
ENSMUSG00000082494	0.259522	0.519043	1.72414	0	0
Rnf44	0.259509	0	27.5862	0.519018	10.3704
Trim30a	0.259435	0	13.7931	0.51887	17.4074
Midn	0.259421	0	12.069	0.518841	12.0988
Acot9	0.259368	0	1.72414	0.518736	9.50617
H2afv	0.259302	0	39.6552	0.518605	29.0123
Ddah2	0.259096	0	3.44828	0.518191	9.87654
Endou	0.25892	0	0	0.51784	0.864198
Sav1	0.258669	0	0	0.517338	7.40741
Dbp	0.258664	0	3.44828	0.517327	18.1481
Gm29237	0.258597	0	0	0.517195	2.22222
Slc16a13	0.258569	0	0	0.517138	2.09877
Pcolce	0.258535	0.225749	12.069	0.291321	4.44444
Vegfc	0.258528	0	8.62069	0.517056	4.69136
Pradc1	0.258505	0	1.72414	0.517011	6.91358
Ubxn1	0.258402	0	18.9655	0.516805	17.4074
Dcn	0.258395	0.503115	51.7241	0.0136754	5.55556
Polr2i	0.258335	0	3.44828	0.51667	10.1235
Tpm3-rs7	0.25832	0	0	0.516639	3.20988
P2ry10b	0.258191	0.516382	1.72414	0	0
ENSMUSG00000054488	0.258191	0.516382	1.72414	0	0
Ocel1	0.258041	0	0	0.516082	4.32099
Cpt1a	0.258029	0	22.4138	0.516058	14.0741
Akr1c12	0.257948	0	0	0.515896	0.37037
Ephx1	0.257865	0.0144353	34.4828	0.501294	10.3704
Magoh	0.257788	0	10.3448	0.515576	11.2346
Cr1l	0.257767	0	18.9655	0.515533	26.1728
Mapre1	0.257423	0	41.3793	0.514845	23.7037
Polr2m	0.257284	0	22.4138	0.514568	14.1975
1300002E11Rik	0.25723	0	5.17241	0.51446	7.28395
Cnih4	0.257084	0	8.62069	0.514168	16.4198
Rdm1	0.256986	0	13.7931	0.513971	11.6049
Cnot6	0.256757	0	31.0345	0.513513	36.5432
Fez2	0.25664	0	13.7931	0.513279	14.4444
Nhp2l1	0.256396	0	0	0.512791	19.6296
Tomm7	0.256305	0	27.5862	0.512611	25.3086
Mvp	0.256288	0	37.931	0.512576	6.04938
Tgtp1	0.25623	0.51246	10.3448	0	0
Tpst2	0.256182	0	12.069	0.512363	13.7037
Sf3b4	0.255968	0	18.9655	0.511936	10.4938
Ndufb7	0.255917	0	17.2414	0.511835	31.358
Agrn	0.25589	0	18.9655	0.51178	25.8025
Ubl4a	0.25581	0	1.72414	0.511619	7.77778
Rexo2	0.25557	0	22.4138	0.511139	20.6173
Actg1	0.255511	0.00491679	72.4138	0.506106	50.8642
Chmp3	0.25549	0	25.8621	0.51098	25.5556
Gm7160	0.255411	0	1.72414	0.510821	3.7037
2310036O22Rik	0.25531	0	0	0.51062	21.9753
Commd2	0.255132	0	13.7931	0.510263	8.02469
Prdx1	0.254874	0	50	0.509747	56.7901
Lyz2	0.254764	0.28757	10.3448	0.221958	1.97531
Ppia	0.254699	0.04136	55.1724	0.468038	62.963
Wasf2	0.254687	0	25.8621	0.509375	48.1481
Msr1	0.254538	0.509075	1.72414	0	0.123457
Muc3a	0.254538	0.509075	1.72414	0	0.864198
Olfr983	0.254538	0.509075	1.72414	0	0
ENSMUSG00000054178	0.254538	0.509075	1.72414	0	0
C030013C21Rik	0.254538	0.509075	1.72414	0	0
ENSMUSG00000104641	0.254538	0.509075	1.72414	0	0
Hmgn1	0.254272	0.0368386	50	0.471706	20.9877
Dtx3l	0.254253	0	3.44828	0.508506	5.4321
Acadl	0.254017	0	24.1379	0.508035	23.5802
Cd320	0.253926	0	12.069	0.507851	10.7407
Col15a1	0.25392	0.406524	13.7931	0.101316	2.34568
Lbr	0.253895	0	0	0.50779	10.6173
Fnbp1l	0.253868	0	31.0345	0.507736	28.2716
1110034G24Rik	0.253765	0	0	0.50753	21.6049
Rbx1	0.253658	0	29.3103	0.507315	38.0247
Krtcap2	0.253653	0	10.3448	0.507305	24.4444
Sfn	0.253618	0	1.72414	0.507236	2.09877
Rnpepl1	0.253525	0	5.17241	0.50705	12.3457
Atp5j	0.253212	0	37.931	0.506423	50.9877
Psmb6	0.253057	0	25.8621	0.506114	31.6049
Ralb	0.252485	0	15.5172	0.504969	13.8272
Csnk1g2	0.252342	0	17.2414	0.504685	11.7284
Rpl23a	0.251989	0	12.069	0.503979	8.2716
Il1rl1	0.251972	0.503944	1.72414	0	0
Ccl4	0.251972	0.503944	1.72414	0	0
Tktl1	0.251972	0.503944	1.72414	0	0.37037
Plekhg6	0.251972	0.503944	1.72414	0	0
ENSMUSG00000065047	0.251972	0.503944	1.72414	0	0
ENSMUSG00000082431	0.251972	0.503944	1.72414	0	0
ENSMUSG00000086389	0.251972	0.503944	1.72414	0	0
ENSMUSG00000102872	0.251972	0.503944	1.72414	0	0
ENSMUSG00000105870	0.251972	0.503944	1.72414	0	0
ENSMUSG00000109786	0.251972	0.503944	1.72414	0	0
ENSMUSG00000110149	0.251972	0.503944	1.72414	0	0
Atp5g2	0.251941	0	1.72414	0.503882	25.8025
Wbp5	0.251851	0	0	0.503702	25.3086
Angpt2	0.251843	0	1.72414	0.503686	3.20988
Fbxl8	0.251829	0	1.72414	0.503659	2.09877
Sertad3	0.251826	0	1.72414	0.503652	4.69136
Fkbp4	0.25174	0.0102118	27.5862	0.493269	23.4568
Grpel1	0.251547	0	8.62069	0.503093	10.3704
Ap5b1	0.251406	0	0	0.502811	0.864198
Stx3	0.251402	0	10.3448	0.502804	16.5432
Lamtor5	0.251397	0	20.6897	0.502795	19.2593
ENSMUSG00000090399	0.251357	0.502715	10.3448	0	0
Ing1	0.251127	0	15.5172	0.502253	4.93827
Fcrla	0.251113	0	13.7931	0.502227	6.04938
Tceb2	0.251063	0	0	0.502126	32.2222
Gmnn	0.251062	0	5.17241	0.502124	3.58025
Prelid1	0.251056	0	12.069	0.502112	10.9877
Svbp	0.250906	0	6.89655	0.501813	9.50617
Higd2a	0.250887	0	32.7586	0.501773	24.6914
Plekhg5	0.250838	0	13.7931	0.501675	11.7284
Slc46a3	0.250727	0	12.069	0.501453	9.1358
Eif1	0.250568	0	53.4483	0.501136	59.7531
Abt1	0.250553	0	8.62069	0.501105	3.7037
Card19	0.250525	0	8.62069	0.50105	14.4444
Gm36536	0.250516	0.501032	5.17241	0	0
Oas2	0.250253	0	0	0.500506	1.60494
Pmepa1	0.250174	0.196373	18.9655	0.303976	15.1852
Sub1	0.250082	0	27.5862	0.500163	33.5802
Trim34a	0.249868	0	6.89655	0.499735	5.92593
Gins4	0.249864	0	5.17241	0.499727	5.18519
Tgfb2	0.249777	0	22.4138	0.499554	24.5679
Taf7	0.249614	0	0	0.499228	7.16049
Cpne3	0.24957	0	29.3103	0.499141	14.8148
Mfsd2b	0.249517	0.499035	1.72414	0	0.617284
ENSMUSG00000081274	0.249517	0.499035	1.72414	0	0
Unc45bos	0.249517	0.499035	1.72414	0	0
Insr	0.249461	0	29.3103	0.498923	47.4074
Lamtor2	0.249299	0	10.3448	0.498597	22.5926
Chmp2b	0.249172	0	10.3448	0.498344	7.65432
Eif3j2	0.249161	0	13.7931	0.498323	5.30864
Ddx60	0.248902	0	1.72414	0.497803	8.88889
Mrap	0.248707	0.497414	3.44828	0	0.246914
Il17rd	0.248688	0	8.62069	0.497377	14.9383
Gata6	0.2485	0.496999	1.72414	0	0
ENSMUSG00000076609	0.2485	0.496999	1.72414	0	0
ENSMUSG00000086154	0.2485	0.496999	1.72414	0	0
ENSMUSG00000099757	0.2485	0.496999	1.72414	0	0
Eif3h	0.248402	0	39.6552	0.496805	22.8395
Hey1	0.248274	0	13.7931	0.496548	8.39506
Lsm5	0.248267	0	6.89655	0.496535	9.87654
Ppp1r18	0.248241	0	6.89655	0.496483	4.44444
Sorbs2	0.248023	0	25.8621	0.496046	69.7531
Tspan12	0.248021	0	15.5172	0.496042	18.7654
Crybg3	0.247819	0	1.72414	0.495637	10.8642
Foxd1	0.247726	0	3.44828	0.495452	2.22222
Tecpr2	0.247551	0	5.17241	0.495101	48.7654
Ctnna1	0.247506	0.0143722	43.1034	0.480641	41.2346
Arfip1	0.247244	0	8.62069	0.494489	5.06173
Ddah1	0.247207	0	25.8621	0.494415	41.6049
Tmpo	0.24709	0	13.7931	0.494181	14.9383
Nop10	0.247055	0	17.2414	0.49411	30.6173
Tcf3	0.246957	0	8.62069	0.493913	13.0864
Mcm3	0.246838	0	1.72414	0.493675	1.85185
Pou2f3	0.246679	0	39.6552	0.493357	6.04938
Gamt	0.246647	0	8.62069	0.493293	5.92593
ENSMUSG00000092525	0.246552	0.493104	1.72414	0	0
Polr2k	0.246551	0	8.62069	0.493103	17.1605
Ninj1	0.246204	0	13.7931	0.492407	8.64198
Mmd	0.246166	0	10.3448	0.492331	10.1235
Capns1	0.246131	0	43.1034	0.492262	42.0988
Rassf1	0.246076	0	0	0.492152	13.3333
Hmbox1	0.245963	0.205583	32.7586	0.286343	26.7901
Wdr83os	0.245947	0	6.89655	0.491894	12.3457
Rpl12	0.245947	0.195471	56.8966	0.296423	6.66667
Chmp6	0.245871	0	8.62069	0.491742	6.91358
Spag6l	0.24584	0	3.44828	0.49168	43.0864
Atf5	0.245502	0.211173	20.6897	0.279832	4.19753
Oaz2	0.245487	0	37.931	0.490973	33.2099
Taldo1	0.245387	0	17.2414	0.490775	26.1728
Smarce1	0.245336	0	17.2414	0.490672	11.7284
Dennd2c	0.244906	0	0	0.489812	2.71605
2200002D01Rik	0.244852	0	0	0.489704	0.987654
Ppie	0.244775	0	0	0.489551	7.53086
Dach1	0.244704	0	10.3448	0.489407	37.7778
Stat1	0.244536	0	10.3448	0.489072	13.8272
Zfp715	0.244475	0	3.44828	0.488949	9.87654
Thap7	0.244472	0	3.44828	0.488944	8.51852
Tmem109	0.244274	0	13.7931	0.488548	13.5802
Sema6a	0.244273	0.148792	34.4828	0.339754	35.679
Cox17	0.244214	0	17.2414	0.488427	7.40741
Plcg1	0.24418	0.137947	20.6897	0.350412	20.1235
Mbd3	0.244121	0	17.2414	0.488243	12.2222
Mllt6	0.244081	0	18.9655	0.488161	18.0247
Btg1	0.244069	0	15.5172	0.488138	13.5802
Car7	0.243922	0.487844	5.17241	0	1.60494
Gadd45b	0.243844	0	6.89655	0.487687	2.34568
Arl6ip5	0.243745	0	36.2069	0.487489	37.6543
Apbb2	0.243725	0.163029	43.1034	0.324421	57.284
Eif5a	0.243699	0	37.931	0.487399	28.5185
Chrnb1	0.243545	0	3.44828	0.487091	1.23457
Nfya	0.243477	0	8.62069	0.486954	4.5679
Erbb2	0.243298	0	5.17241	0.486595	2.59259
Hlf	0.243243	0.222226	37.931	0.264261	14.9383
Ctdsp2	0.24298	0	20.6897	0.48596	15.3086
Tmem258	0.242946	0	10.3448	0.485891	22.2222
Rpa3	0.242876	0	6.89655	0.485751	7.90123
Rpl7a-ps5	0.242719	0	0	0.485439	8.14815
Dnajc14	0.242611	0	1.72414	0.485222	8.14815
Git1	0.24258	0	5.17241	0.485161	10.9877
Zbtb14	0.242561	0	3.44828	0.485122	4.44444
Smim15	0.24251	0	18.9655	0.485021	7.65432
H2-Eb1	0.2423	0.359125	17.2414	0.125475	1.35802
Klhl23	0.242264	0	12.069	0.484528	8.39506
Rpl7a	0.242229	0.138801	56.8966	0.345656	8.76543
Atp6v0e	0.242226	0	24.1379	0.484453	29.0123
Ndufb11	0.242158	0	25.8621	0.484316	32.2222
Pir	0.242132	0	5.17241	0.484263	19.7531
Atg101	0.241996	0	6.89655	0.483992	9.1358
Acaa2	0.241953	0	10.3448	0.483906	8.51852
Snrpb2	0.241912	0	20.6897	0.483825	12.8395
Rps19bp1	0.241861	0	5.17241	0.483722	7.90123
Imp3	0.241665	0	20.6897	0.483329	9.25926
Tmem14c	0.241602	0	18.9655	0.483204	12.3457
Srp14	0.241585	0	34.4828	0.48317	29.5062
Prickle3	0.241336	0	3.44828	0.482673	2.59259
Cnbd2	0.241272	0	17.2414	0.482545	28.2716
Hspa1a	0.241244	0	0	0.482487	3.45679
Snapc5	0.241153	0	12.069	0.482306	12.716
Fam13c	0.241107	0	0	0.482214	28.8889
Cbr3	0.24105	0	3.44828	0.482101	2.96296
Adh5	0.241043	0	3.44828	0.482087	9.87654
Gucy1a3	0.240998	0	0	0.481996	9.38272
Eif4a3	0.240816	0	15.5172	0.481631	11.1111
Gm3848	0.24081	0	0	0.481619	1.60494
Timm17b	0.240802	0	1.72414	0.481605	8.39506
Capza2	0.240764	0	20.6897	0.481528	25.3086
Hypk	0.240749	0	6.89655	0.481497	19.2593
Lcp1	0.240668	0.445112	8.62069	0.0362239	3.45679
Lrrc58	0.240652	0.0260968	79.3103	0.455207	34.4444
Fam117b	0.24063	0	22.4138	0.481259	32.3457
mt-Nd4	0.24052	0	0	0.48104	47.4074
4833422C13Rik	0.240503	0	5.17241	0.481005	4.07407
H2-M3	0.240348	0	0	0.480695	4.19753
Grb10	0.240308	0	25.8621	0.480616	25.679
Psme2	0.240132	0	22.4138	0.480264	3.45679
Arf2	0.240127	0	8.62069	0.480254	7.28395
Gpr160	0.23997	0	0	0.479941	4.32099
Edf1	0.23992	0	32.7586	0.479841	34.9383
P2ry6	0.239915	0.47983	3.44828	0	0.37037
mt-Nd5	0.239871	0	0	0.479743	9.50617
Sec13	0.239712	0	20.6897	0.479423	11.2346
Mrps21	0.239534	0	15.5172	0.479068	24.9383
Pfkl	0.239522	0	12.069	0.479044	14.1975
Hsd17b10	0.239495	0	10.3448	0.478991	9.38272
Snrpf	0.239416	0	0	0.478832	13.5802
Gm10549	0.239343	0	0	0.478685	0.493827
Srgap2	0.23933	0.0714211	32.7586	0.407238	56.4198
Agfg1	0.239327	0	27.5862	0.478653	27.1605
Kbtbd2	0.239249	0	6.89655	0.478497	12.3457
Gm26532	0.239239	0	0	0.478478	17.037
Orai3	0.239195	0	3.44828	0.478391	4.81481
Dram2	0.239123	0	20.6897	0.478247	24.1975
Cib1	0.239102	0	8.62069	0.478203	5.67901
Gatad2a	0.238997	0	22.4138	0.477995	18.642
Ranbp1	0.238815	0	8.62069	0.47763	24.9383
D030056L22Rik	0.238788	0	5.17241	0.477576	5.06173
Abhd5	0.238668	0	6.89655	0.477336	7.77778
Thap11	0.23861	0	3.44828	0.477219	4.32099
mt-Nd3	0.238581	0	0	0.477161	9.01235
Snrnp27	0.238517	0	18.9655	0.477034	21.358
mt-Nd1	0.238494	0	0	0.476988	61.1111
App	0.238409	0.195806	86.2069	0.281013	80
Ddit4l	0.238384	0	8.62069	0.476768	12.8395
Klhl4	0.238375	0.41517	5.17241	0.0615796	7.40741
Wtip	0.238371	0	8.62069	0.476741	7.28395
Synpo	0.238363	0.33593	13.7931	0.140795	2.59259
Cdkn1b	0.237956	0	17.2414	0.475912	11.2346
4921524J17Rik	0.23795	0	0	0.4759	8.88889
Prkd3	0.237858	0	20.6897	0.475715	20.2469
Rapgef2	0.237727	0	25.8621	0.475454	59.5062
Gm26632	0.237671	0	0	0.475343	5.55556
mt-Cytb	0.237618	0	0	0.475236	61.9753
Ndufa2	0.237581	0	22.4138	0.475163	33.4568
Sep15	0.237547	0	0	0.475093	35.0617
Hmgn5	0.237518	0	8.62069	0.475037	4.69136
Nova2	0.237491	0	0	0.474982	7.16049
Polr1d	0.237408	0	24.1379	0.474816	17.284
Anxa7	0.237392	0	27.5862	0.474783	20.8642
Polr2c	0.237154	0	10.3448	0.474308	16.6667
Rell1	0.237148	0	17.2414	0.474295	15.5556
Prickle4	0.237054	0.474108	1.72414	0	0.123457
Ms4a19	0.237054	0.474108	1.72414	0	0
ENSMUSG00000048709	0.237054	0.474108	1.72414	0	0
ENSMUSG00000102703	0.237054	0.474108	1.72414	0	0
ENSMUSG00000106438	0.237054	0.474108	1.72414	0	0
ENSMUSG00000113259	0.237054	0.474108	1.72414	0	0
Bola3	0.236947	0	17.2414	0.473894	14.0741
Lrp5	0.236941	0	10.3448	0.473883	14.321
4930520O04Rik	0.236696	0.473392	3.44828	0	0
Gna11	0.236676	0	39.6552	0.473352	15.5556
Fkbp7	0.236643	0	3.44828	0.473287	7.40741
Glmp	0.236608	0	22.4138	0.473215	15.5556
Rsu1	0.236589	0	18.9655	0.473177	32.716
Taf9b	0.236573	0	6.89655	0.473146	5.18519
Csnk2b	0.236548	0	15.5172	0.473097	12.5926
Arpc2	0.236478	0	41.3793	0.472957	35.5556
Rras2	0.236292	0	5.17241	0.472585	7.03704
Fem1a	0.236268	0	6.89655	0.472535	4.93827
Bzw1	0.236263	0	24.1379	0.472525	14.6914
Plp2	0.236135	0	3.44828	0.47227	2.46914
Tbc1d1	0.236127	0	12.069	0.472254	13.3333
Tbca	0.236105	0	27.5862	0.472211	30.2469
Pcdh19	0.2361	0	15.5172	0.472199	20.3704
Trmt112	0.236011	0	8.62069	0.472022	17.037
Nav1	0.235999	0.277714	34.4828	0.194285	25.0617
Jaml	0.23597	0.471939	3.44828	0	0
Syde1	0.235802	0	0	0.471605	8.2716
Uap1	0.235573	0	12.069	0.471146	11.8519
H2afz	0.235558	0	5.17241	0.471115	29.2593
Slc9a3r1	0.235534	0	10.3448	0.471069	10.2469
Dnttip2	0.235521	0	1.72414	0.471043	8.2716
Filip1	0.235426	0	12.069	0.470852	24.1975
Bach1	0.23533	0	5.17241	0.470661	7.77778
Ccng2	0.235325	0	5.17241	0.47065	5.55556
Tmem256	0.235177	0	3.44828	0.470353	23.8272
Psma2	0.235154	0	10.3448	0.470308	21.6049
Gm4799	0.23508	0	0	0.47016	2.46914
Ajuba	0.23507	0	5.17241	0.470141	2.71605
Myeov2	0.235033	0	0	0.470065	23.9506
1700020I14Rik	0.234915	0	0	0.469831	25.3086
Mycn	0.234827	0	1.72414	0.469654	0.987654
Trak2	0.234737	0	12.069	0.469473	13.0864
Nid1	0.234645	0.017793	44.8276	0.451497	12.8395
Ndufa6	0.234605	0	20.6897	0.46921	35.3086
Kbtbd11	0.234593	0.106495	29.3103	0.36269	10
Cetn3	0.234503	0	18.9655	0.469007	22.5926
Plekhg2	0.234503	0	8.62069	0.469007	8.76543
Sar1a	0.234294	0	34.4828	0.468587	14.8148
Dnajc8	0.234249	0	25.8621	0.468499	28.0247
Eif3a	0.234215	0	29.3103	0.468429	23.8272
Abracl	0.234213	0	1.72414	0.468426	5.30864
Plin2	0.234115	0	3.44828	0.46823	10.4938
Chn2	0.234103	0	10.3448	0.468205	30.2469
Tma7	0.234071	0	20.6897	0.468142	33.8272
Otud1	0.234014	0	3.44828	0.468028	3.58025
Nhp2	0.233947	0	8.62069	0.467895	5.80247
Dpt	0.233765	0.467531	5.17241	0	0.123457
Klhl5	0.2337	0	27.5862	0.4674	29.7531
Gucy1b3	0.233679	0	0	0.467358	16.2963
Esd	0.233661	0	15.5172	0.467321	19.1358
Mat2b	0.233607	0	24.1379	0.467214	18.0247
Gtf3c6	0.233402	0	8.62069	0.466803	7.03704
Col3a1	0.233244	0.430949	17.2414	0.0355379	1.48148
Kctd11	0.233228	0	0	0.466456	1.60494
Hnrnpul2	0.233201	0	24.1379	0.466401	16.1728
Rdx	0.232993	0.0514375	46.5517	0.414549	29.7531
Pa2g4	0.232897	0	15.5172	0.465794	11.358
Llgl2	0.232781	0	0	0.465562	1.35802
Zbtb10	0.232545	0	6.89655	0.465091	6.54321
Lepr	0.23228	0	0	0.464561	6.41975
Ddx3x	0.232236	0	31.0345	0.464471	27.4074
Pttg1	0.232202	0	6.89655	0.464403	23.5802
Gm10146	0.232129	0	0	0.464258	8.64198
Sipa1l2	0.232102	0	22.4138	0.464204	13.3333
Trib2	0.232097	0	17.2414	0.464194	15.0617
Stard13	0.23205	0	13.7931	0.4641	8.64198
Mrpl34	0.231884	0	6.89655	0.463767	9.38272
Dennd5b	0.231848	0.194474	22.4138	0.269223	34.0741
Tbc1d2b	0.231656	0	8.62069	0.463312	16.4198
Cdk2ap2	0.231597	0	8.62069	0.463193	11.1111
Sf3a3	0.231585	0.252368	58.6207	0.210801	9.25926
Cwc15	0.231563	0	22.4138	0.463126	18.3951
Kcnj12	0.231555	0	0	0.463111	2.46914
Pkig	0.231469	0.0566578	29.3103	0.406281	25.679
Polr2f	0.231421	0	8.62069	0.462842	14.321
Mrpl50	0.23141	0	8.62069	0.462819	7.16049
Cyb5a	0.23139	0	29.3103	0.462779	21.6049
Ccdc71	0.231389	0	3.44828	0.462777	5.92593
Plac9b	0.23134	0.462679	13.7931	0	0
Llph	0.231077	0	5.17241	0.462155	10.3704
Nfkb2	0.230957	0	15.5172	0.461913	1.97531
Ptn	0.230883	0	63.7931	0.461766	77.1605
Hnrnpk	0.230872	0	51.7241	0.461744	39.3827
Brd2	0.230864	0	29.3103	0.461728	16.1728
Cebpzos	0.230735	0	5.17241	0.46147	9.62963
Nedd8	0.230698	0	18.9655	0.461396	33.2099
Ccdc124	0.230627	0	6.89655	0.461254	13.3333
Rpl36al	0.230556	0	3.44828	0.461111	25.4321
Pdgfd	0.230529	0	25.8621	0.461058	58.8889
Sh3tc2	0.23041	0	3.44828	0.46082	12.3457
Tjp1	0.230349	0	48.2759	0.460698	78.642
Ogfr	0.230161	0	3.44828	0.460322	7.28395
Srp9	0.230089	0	20.6897	0.460179	19.0123
Tmem184b	0.229816	0	24.1379	0.459632	21.4815
Tmem159	0.229738	0	5.17241	0.459476	6.91358
Ssu72	0.229706	0	5.17241	0.459411	23.4568
Kdelc2	0.229677	0	0	0.459355	3.7037
Gadd45gip1	0.229587	0	5.17241	0.459174	15.0617
Ctbp1	0.229514	0	27.5862	0.459028	21.4815
Sec14l1	0.229467	0	25.8621	0.458934	20.1235
ENSMUSG00000089999	0.229372	0.458744	6.89655	0	0
Aim2	0.229303	0	1.72414	0.458606	11.6049
Ebna1bp2	0.22921	0	3.44828	0.458419	10.2469
Gpx7	0.229156	0	0	0.458311	4.5679
Smim10l1	0.228617	0	29.3103	0.457234	20.2469
Prkar1a	0.22837	0	62.069	0.45674	37.9012
Ier5l	0.228236	0	6.89655	0.456472	2.46914
Itpr2	0.22808	0.206696	22.4138	0.249463	27.284
Bax	0.227869	0	10.3448	0.455737	25.3086
Slc38a3	0.227827	0	39.6552	0.455655	25.0617
Exoc3l2	0.227786	0	8.62069	0.455573	1.11111
Ercc6l	0.227659	0	0	0.455319	0.37037
Psmd10	0.227516	0	12.069	0.455031	6.04938
Sf3a2	0.227325	0	6.89655	0.45465	7.90123
Hprt	0.227267	0	18.9655	0.454535	26.7901
Cactin	0.226978	0	1.72414	0.453955	6.17284
Ddit4	0.226967	0	34.4828	0.453935	12.8395
Gnpda2	0.226893	0.171102	10.3448	0.282684	7.16049
Ptgfrn	0.226411	0.148306	15.5172	0.304516	9.25926
Sumo2	0.226394	0	25.8621	0.452788	38.0247
Prkx	0.226352	0	13.7931	0.452703	5.55556
Mrps18c	0.226272	0	6.89655	0.452543	13.3333
Lasp1	0.226206	0	27.5862	0.452411	15.3086
Pdcd10	0.226123	0	8.62069	0.452246	25.1852
Pde3a	0.22591	0	1.72414	0.45182	9.1358
Ndufv3	0.225827	0	15.5172	0.451654	26.6667
Flna	0.225804	0	27.5862	0.451609	14.1975
Mrpl33	0.225722	0	10.3448	0.451444	21.4815
Aes	0.225715	0	0	0.451429	20.8642
Aanat	0.22563	0.451261	3.44828	0	0.123457
Actn1	0.225628	0.0371457	22.4138	0.414111	12.5926
Sqrdl	0.22562	0	0	0.451241	4.81481
Gm12002	0.225577	0	0	0.451155	6.54321
ENSMUSG00000074034	0.225563	0.451126	8.62069	0	0
1110008F13Rik	0.225522	0	0	0.451043	10.9877
Lgalsl	0.225507	0	6.89655	0.451013	5.55556
Eif6	0.225443	0	6.89655	0.450887	13.5802
Pdcl	0.225313	0	13.7931	0.450626	6.17284
Fam72a	0.225259	0	0	0.450518	1.60494
Zxdb	0.225221	0	5.17241	0.450443	3.33333
Ppp1cb	0.225163	0	44.8276	0.450325	37.9012
Sox13	0.224934	0	17.2414	0.449867	9.62963
Fam96b	0.224758	0	0	0.449516	11.9753
Mpzl1	0.224661	0	32.7586	0.449323	42.3457
Fxyd2	0.22442	0.448841	3.44828	0	0.246914
Mcc	0.224285	0	27.5862	0.44857	53.9506
Mtpap	0.224281	0	12.069	0.448562	11.8519
Gstk1	0.224057	0	10.3448	0.448114	4.19753
Magi3	0.224043	0	17.2414	0.448086	37.1605
Ncl	0.22398	0	27.5862	0.44796	23.2099
Swi5	0.223955	0	29.3103	0.44791	25.9259
Ccdc109b	0.223883	0	0	0.447766	3.45679
Cysltr1	0.223776	0	0	0.447552	2.59259
Tceb1	0.223584	0	0	0.447167	20.3704
Hist1h1c	0.223446	0	0	0.446892	12.963
Batf	0.223442	0	1.72414	0.446885	1.60494
Eif3d	0.223414	0	12.069	0.446828	10.8642
Mprip	0.22339	0.0149395	44.8276	0.431841	36.7901
Marveld1	0.223344	0	8.62069	0.446689	4.32099
Tceb3	0.223296	0	0	0.446592	4.19753
Tcn2	0.222715	0	20.6897	0.44543	15.679
Heph	0.222654	0	3.44828	0.445309	34.1975
Timm13	0.222639	0	8.62069	0.445277	20.9877
Rab35	0.222573	0	5.17241	0.445146	7.03704
Gm10250	0.222313	0	0	0.444626	32.963
Arf1	0.222279	0	51.7241	0.444557	31.358
Prelid2	0.22201	0	1.72414	0.44402	2.59259
Eif4a1	0.221975	0	15.5172	0.443951	34.1975
Rbm15	0.221887	0	12.069	0.443774	7.53086
Amotl2	0.221849	0.0673493	10.3448	0.376349	9.25926
Maf1	0.221818	0	17.2414	0.443636	11.7284
Nck1	0.221768	0	24.1379	0.443537	20.4938
Eef1g	0.221691	0.029396	44.8276	0.413985	32.5926
Eif2ak2	0.221683	0	10.3448	0.443367	8.64198
Dnm3	0.221676	0.234188	22.4138	0.209165	63.3333
Fadd	0.221648	0	3.44828	0.443295	1.60494
Pim1	0.221602	0	3.44828	0.443203	5.92593
Tap2	0.221556	0	12.069	0.443112	16.2963
Naif1	0.221456	0	0	0.442912	0.740741
Plxna2	0.221416	0	20.6897	0.442832	32.8395
Nxt1	0.221385	0	1.72414	0.44277	5.92593
Mrfap1	0.221354	0	34.4828	0.442709	30.2469
Dynlrb1	0.221196	0	25.8621	0.442393	31.358
Lgals7	0.221024	0	0	0.442048	0.864198
Plec	0.220839	0	20.6897	0.441679	19.8765
Akr1a1	0.220698	0.0119138	55.1724	0.429482	33.2099
Ifngr1	0.220628	0	15.5172	0.441256	13.4568
Med21	0.220429	0	13.7931	0.440859	11.4815
Ptbp3	0.220385	0	25.8621	0.44077	21.358
Romo1	0.220209	0	24.1379	0.440418	22.4691
Csk	0.220024	0	15.5172	0.440047	10.3704
B230219D22Rik	0.220021	0	18.9655	0.440042	19.2593
Rasl11a	0.21998	0	1.72414	0.43996	2.96296
Tgfbi	0.219926	0.439851	12.069	0	1.60494
Bag1	0.219844	0	17.2414	0.439688	10.3704
Ubtf	0.219797	0	15.5172	0.439594	13.2099
Pald1	0.21975	0	13.7931	0.439499	10.9877
Dek	0.219745	0	10.3448	0.43949	16.5432
Gm26569	0.21962	0	0	0.439239	1.48148
Slc35d2	0.219285	0	1.72414	0.438569	5.4321
Tex261	0.219262	0	24.1379	0.438524	13.4568
Ppp1r11	0.219245	0	6.89655	0.43849	21.358
Mtcl1	0.218972	0	3.44828	0.437944	32.8395
Serbp1	0.218936	0	48.2759	0.437872	31.6049
Bst1	0.218919	0.437839	3.44828	0	0.37037
Ap3s1	0.218894	0	24.1379	0.437788	23.2099
Chchd1	0.218844	0	12.069	0.437688	13.4568
Ran	0.218784	0	36.2069	0.437569	19.8765
Psmd6	0.218715	0	3.44828	0.43743	13.9506
Trim14	0.218689	0	1.72414	0.437378	5.55556
Rbm7	0.218664	0	17.2414	0.437328	12.4691
Mxd4	0.218532	0	29.3103	0.437065	25.1852
Gm27201	0.218444	0	0	0.436889	1.35802
Ywhaz	0.21835	0	29.3103	0.436701	21.7284
Tollip	0.218321	0	12.069	0.436643	10.4938
Skp1a	0.218308	0	18.9655	0.436616	24.8148
Apod	0.218244	0.436488	56.8966	0	21.8519
Sdhaf1	0.218068	0	3.44828	0.436135	4.69136
Cox6a1	0.218003	0	37.931	0.436006	52.8395
Ppp1r13b	0.218	0	12.069	0.436	23.2099
Bad	0.217972	0	8.62069	0.435943	13.3333
Siva1	0.217952	0	5.17241	0.435904	5.55556
Lrrk1	0.217861	0	6.89655	0.435723	18.642
Irf1	0.217799	0	6.89655	0.435598	6.79012
Efnb1	0.217744	0	6.89655	0.435489	4.44444
Fkbp9	0.217705	0	24.1379	0.43541	12.4691
Nrgn	0.217575	0.43515	13.7931	0	1.35802
Nr1h3	0.217524	0	1.72414	0.435049	5.18519
A430005L14Rik	0.217453	0	8.62069	0.434905	8.02469
Bcl7b	0.217391	0	8.62069	0.434782	9.50617
Rad21	0.21737	0	25.8621	0.434739	15.0617
Pdcd6	0.217182	0	20.6897	0.434365	15.3086
Bcl2l12	0.217013	0	0	0.434027	6.2963
Efemp2	0.216973	0	1.72414	0.433946	7.40741
Cd163	0.216935	0.43387	5.17241	0	0.123457
Mrpl14	0.216898	0	5.17241	0.433795	13.0864
Rab22a	0.216772	0	6.89655	0.433544	15.4321
Ywhab	0.216681	0	58.6207	0.433362	28.0247
Coro1b	0.216681	0	27.5862	0.433361	10.8642
Efhc2	0.216622	0	1.72414	0.433245	6.91358
Nfyb	0.21656	0	10.3448	0.43312	4.81481
Prdx4	0.216535	0	15.5172	0.433071	11.358
Rhog	0.216468	0	12.069	0.432935	4.93827
Zfp319	0.216337	0	6.89655	0.432674	1.85185
Lamc3	0.216302	0	12.069	0.432603	7.65432
Bak1	0.216204	0	1.72414	0.432409	5.30864
Plxna4os1	0.216058	0	0	0.432115	0.864198
Ndufaf3	0.216001	0	6.89655	0.432002	11.358
Prrg2	0.215953	0	5.17241	0.431905	4.69136
Psma4	0.215883	0	10.3448	0.431767	13.4568
Htatsf1	0.215862	0	15.5172	0.431723	8.14815
Nkiras2	0.215726	0	6.89655	0.431453	4.32099
Tceal8	0.21571	0	22.4138	0.431419	10.8642
Zbtb45	0.215625	0	1.72414	0.431251	4.07407
Zfp560	0.215511	0	1.72414	0.431023	11.358
Tbc1d20	0.215509	0	12.069	0.431019	8.64198
Hip1	0.215504	0	15.5172	0.431007	56.9136
[truncated: 4,099 more rows]

## Sheet: Ependymal_cells
gene	combined_expr_specificity	cellex_score_zhang	expr_proportion_zhang	cellex_score_ludwig	expr_proportion_ludwig
4833427G06Rik	0.961016	0.979461	15.5963	0.942571	23.3908
Lrrc43	0.954438	0.938169	12.844	0.970706	33.9655
Ttc21a	0.943481	0.965744	21.1009	0.921218	31.6667
Cdhr3	0.937765	0.947653	51.3761	0.927877	35.1724
Lhb	0.929522	0.917353	6.42202	0.941691	8.04598
Mapk15	0.919681	0.913125	32.1101	0.926238	26.1494
Ccdc153	0.917968	0.948128	52.2936	0.887808	30.3448
1700024G13Rik	0.915797	0.953584	15.5963	0.878009	1.43678
Iqca	0.915751	0.884483	34.8624	0.947019	26.4943
Gm10714	0.910749	0.890186	27.5229	0.931312	53.4483
Ak7	0.910305	0.906115	63.3028	0.914496	54.7126
Spata18	0.908811	0.840505	7.33945	0.977118	8.96552
Lrrc71	0.907545	0.910964	14.6789	0.904126	24.9425
Prr29	0.903943	0.928557	6.42202	0.879329	2.47126
Unc5cl	0.902292	0.896894	22.9358	0.907689	33.3908
Zfp474	0.901823	0.867963	19.2661	0.935683	21.3793
Scnn1a	0.898073	0.92551	15.5963	0.870636	5.4023
Ccdc33	0.896277	0.921232	10.0917	0.871321	11.8391
Ccdc81	0.895306	0.910799	22.9358	0.879814	15.4598
Spag17	0.895225	0.847367	31.1927	0.943082	52.4138
Ttc29	0.89514	0.832182	28.4404	0.958099	36.092
Cfap206	0.893624	0.910408	40.367	0.876839	29.7126
Ppp1r32	0.891818	0.87269	17.4312	0.910946	3.27586
Vwa3a	0.891162	0.905062	49.5413	0.877262	42.1839
Ankfn1	0.886987	0.896306	22.9358	0.877669	62.1839
Pifo	0.880576	0.892665	15.5963	0.868487	23.2759
Gm867	0.880211	0.809863	14.6789	0.950559	39.7701
Dpy19l2	0.878108	0.948028	13.7615	0.808188	10.1724
1700012B09Rik	0.870862	0.912478	25.6881	0.829246	8.04598
Adamts20	0.859706	0.858725	39.4495	0.860687	67.931
Sntn	0.858102	0.778448	6.42202	0.937755	8.21839
Dnah10	0.855941	0.736561	27.5229	0.975322	35.5747
Ankrd66	0.851966	0.75729	21.1009	0.946641	13.2184
Rsph4a	0.851682	0.811893	24.7706	0.891471	10.6897
Cfap45	0.849978	0.813135	18.3486	0.886821	13.8506
1700019G24Rik	0.84654	0.852629	4.58716	0.840452	1.03448
Crocc2	0.844005	0.793679	22.0183	0.894331	17.5287
Ccdc121	0.843082	0.831247	11.9266	0.854916	1.66667
Cfap73	0.840755	0.732596	3.66972	0.948913	5.22989
Cfap61	0.838251	0.786795	42.2018	0.889706	43.4483
Rsph14	0.83801	0.829561	6.42202	0.84646	9.77011
Cckbr	0.837632	0.824453	17.4312	0.850811	3.27586
Uox	0.834799	0.705048	3.66972	0.964551	8.04598
Tctex1d4	0.83396	0.694976	15.5963	0.972944	18.3908
Dnah5	0.830961	0.794324	42.2018	0.867598	38.2759
Stoml3	0.829927	0.785653	26.6055	0.874201	5.51724
Drc7	0.826725	0.727807	21.1009	0.925643	17.4713
Cyp2s1	0.825565	0.886311	5.50459	0.764819	4.02299
Adgb	0.822321	0.812236	26.6055	0.832407	34.0805
Tmem212	0.816825	0.721341	59.633	0.912309	51.7241
Fam216b	0.815944	0.702302	39.4495	0.929586	31.3218
Vmn2r39	0.815018	0.70569	9.17431	0.924346	0.977011
C1qtnf3	0.814547	0.706496	33.0275	0.922597	3.56322
Wdr63	0.813399	0.706936	47.7064	0.919863	35.0575
Lrrc10b	0.811193	0.91271	14.6789	0.709675	1.66667
Ccdc60	0.809777	0.766985	17.4312	0.85257	23.5632
Lrrc46	0.807336	0.769334	5.50459	0.845338	4.88506
Xylb	0.806183	0.861493	6.42202	0.750874	3.96552
Fam81b	0.803339	0.661844	11.0092	0.944834	15.0575
Odf3b	0.802121	0.689662	28.4404	0.914581	40.8621
Car9	0.800804	0.64859	5.50459	0.953018	4.48276
Dnah6	0.799381	0.693615	56.8807	0.905147	55.6897
BC051019	0.799063	0.716243	11.9266	0.881884	10.2299
Rgs22	0.798849	0.680114	35.7798	0.917584	50.8621
Slc26a3	0.798635	0.630393	12.844	0.966878	9.54023
Cfap52	0.797448	0.662748	33.945	0.932149	33.2759
Gm29571	0.796593	0.753926	23.8532	0.83926	6.32184
Col6a5	0.79646	0.713398	17.4312	0.879523	4.82759
Ppp1r36	0.795245	0.622565	18.3486	0.967926	23.8506
Dnah9	0.7922	0.685557	58.7156	0.898843	56.4943
Dnali1	0.790838	0.667715	34.8624	0.913962	15.1724
Dmkn	0.788306	0.807843	17.4312	0.768769	3.90805
Ak9	0.787168	0.59799	36.6972	0.976345	49.8276
Vmn2r44	0.785938	0.922228	5.50459	0.649647	0.574713
Wdr66	0.785595	0.69466	33.0275	0.87653	36.7816
Lrrc34	0.784278	0.656434	14.6789	0.912121	5.17241
2410004P03Rik	0.783141	0.665011	29.3578	0.901271	5.4023
Mak	0.78262	0.617491	19.2661	0.947749	16.6092
C130026L21Rik	0.781273	0.760763	4.58716	0.801784	4.36782
Dnah12	0.781224	0.63125	46.789	0.931197	76.7241
Hydin	0.778881	0.644493	54.1284	0.913269	51.2644
1700034E13Rik	0.778675	0.620275	1.83486	0.937075	2.93103
Fam166b	0.778111	0.634436	15.5963	0.921786	14.3678
Fbln7	0.778033	0.806189	10.0917	0.749876	3.50575
Akap14	0.776935	0.58398	10.0917	0.969889	11.8391
Armc3	0.775667	0.751776	35.7798	0.799558	29.8851
Zbbx	0.775509	0.634141	24.7706	0.916877	39.1379
Cfap43	0.775056	0.657815	60.5505	0.892296	60.977
Ccdc180	0.773534	0.61815	14.6789	0.928917	29.4828
Cfap161	0.773391	0.633579	20.1835	0.913203	11.1494
1700012P22Rik	0.773349	0.607103	4.58716	0.939594	13.3908
Cfap221	0.769371	0.593184	15.5963	0.945558	17.5287
Gm29538	0.768383	0.585211	6.42202	0.951555	7.93103
Dnah11	0.768152	0.637367	37.6147	0.898937	55.0575
Mlf1	0.767454	0.610282	27.5229	0.924627	15.7471
Tsnaxip1	0.766048	0.637475	10.0917	0.89462	25.7471
Dsg2	0.763101	0.691679	11.0092	0.834522	6.37931
Myb	0.760398	0.72065	12.844	0.800146	8.16092
Ptpn20	0.76	0.6005	3.66972	0.919501	3.27586
Dnaaf3	0.758953	0.548746	12.844	0.969161	28.2759
Dnaaf1	0.757052	0.703679	5.50459	0.810425	3.33333
Fam47e	0.753281	0.607894	10.0917	0.898668	12.2989
Cdkl4	0.752165	0.606364	30.2752	0.897965	26.3793
Lrrc6	0.75181	0.580822	11.0092	0.922799	24.7126
1700016K19Rik	0.750893	0.643561	18.3486	0.858225	8.73563
Lrrc36	0.749787	0.603227	22.9358	0.896347	47.8736
Daw1	0.749397	0.567941	22.0183	0.930854	24.023
Erich2	0.748966	0.583748	9.17431	0.914183	10.6322
Got1l1	0.748524	0.603287	7.33945	0.89376	4.25287
Cfap54	0.748376	0.620583	63.3028	0.876168	61.4943
Maats1	0.745036	0.608046	39.4495	0.882026	23.5057
Ttll6	0.742891	0.671865	11.0092	0.813916	21.5517
Ttc25	0.741778	0.661805	26.6055	0.821751	18.908
Dthd1	0.740512	0.549485	7.33945	0.93154	42.6437
Cfap70	0.740118	0.565803	22.0183	0.914434	28.3908
Tspo2	0.739836	0.699451	1.83486	0.78022	0.574713
Tymp	0.739282	0.665114	8.25688	0.813449	7.70115
Smim5	0.738946	0.671179	17.4312	0.806713	4.08046
Syt10	0.735448	0.633625	24.7706	0.837271	31.6092
Gm28729	0.733156	0.563794	14.6789	0.902519	1.37931
Lrp2	0.729884	0.516638	9.17431	0.94313	10.0575
Dynlrb2	0.72896	0.586476	43.1193	0.871444	24.3103
Lrguk	0.727638	0.589548	20.1835	0.865728	20.1724
Nek5	0.727594	0.529365	22.0183	0.925822	25.2299
Tekt4	0.727275	0.655062	9.17431	0.799487	3.10345
Tctex1d1	0.726633	0.531289	4.58716	0.921977	10.5747
Cfap44	0.726382	0.568153	28.4404	0.88461	53.6207
Ppp1r42	0.726092	0.575056	8.25688	0.877128	11.092
Ttc34	0.725531	0.547807	6.42202	0.903255	6.03448
Ccdc170	0.723729	0.538223	22.9358	0.909236	45.8621
Efhb	0.723614	0.537737	20.1835	0.909491	28.7356
Dnah3	0.722767	0.583643	11.9266	0.861891	31.7241
Eno4	0.721515	0.577728	27.5229	0.865301	18.1034
Lrrc23	0.721096	0.613158	36.6972	0.829034	14.8276
Mdh1b	0.719687	0.513794	7.33945	0.92558	5.97701
Usp43	0.714578	0.680884	6.42202	0.748272	3.04598
Vwa5b1	0.714549	0.638671	27.5229	0.790428	16.2644
1700001C02Rik	0.714442	0.546484	14.6789	0.8824	8.73563
Lrriq1	0.712721	0.56117	20.1835	0.864272	43.7931
Vwa3b	0.712701	0.537945	20.1835	0.887458	18.2184
Cfap69	0.710287	0.588766	44.0367	0.831808	40.4598
Zmynd10	0.708584	0.561653	10.0917	0.855515	11.1494
Ccdc146	0.706985	0.554402	35.7798	0.859567	52.1264
Kcnmb1	0.706807	0.785146	12.844	0.628467	1.72414
Tcp11	0.706315	0.45427	4.58716	0.95836	11.092
Ccdc113	0.704686	0.568732	11.0092	0.84064	5.4023
Fank1	0.704134	0.578867	22.0183	0.829401	21.3793
Wdr49	0.702532	0.491132	36.6972	0.913933	69.7126
Spef2	0.701902	0.555606	65.1376	0.848199	62.5862
Cfap157	0.701898	0.63816	5.50459	0.765636	4.42529
Wdr93	0.701793	0.533455	12.844	0.870132	17.8736
Cfap57	0.701572	0.575063	15.5963	0.828081	7.64368
Ccdc40	0.699828	0.553788	27.5229	0.845869	15.0575
Efcab11	0.699176	0.569588	19.2661	0.828764	17.1264
6820408C15Rik	0.698187	0.562011	14.6789	0.834364	12.4138
Lrrc18	0.697255	0.642727	12.844	0.751783	1.78161
Col8a2	0.696894	0.555569	33.945	0.838219	12.5287
Rassf9	0.695319	0.592492	21.1009	0.798146	34.3678
Krt8	0.693364	0.774886	4.58716	0.611843	0.45977
Sec14l4	0.693197	0.701717	5.50459	0.684677	0.91954
Tnni3	0.692361	0.488875	4.58716	0.895848	8.16092
Chia1	0.691239	0.51615	6.42202	0.866328	4.71264
2010300C02Rik	0.690288	0.603543	13.7615	0.777032	11.1494
Gm26685	0.690145	0.654023	1.83486	0.726266	0.574713
Tekt3	0.689884	0.436334	5.50459	0.943435	3.10345
Cftr	0.688539	0.511078	8.25688	0.866	10.8046
Enkur	0.68748	0.508587	38.5321	0.866373	28.6207
Fam92b	0.686931	0.545412	2.75229	0.828451	3.27586
Cfap126	0.68553	0.56777	37.6147	0.803289	13.6207
Vmn2r30	0.684636	0.524489	7.33945	0.844782	27.1264
Dnaic1	0.684592	0.498598	28.4404	0.870586	30.3448
Lrrc74b	0.684431	0.466828	21.1009	0.902034	11.3793
Armc4	0.684352	0.504422	25.6881	0.864281	38.2184
Asb14	0.683608	0.406514	7.33945	0.960702	12.8736
Fam169b	0.683583	0.49215	6.42202	0.875015	5.34483
Fbxl13	0.68315	0.474736	13.7615	0.891563	21.6092
Wdr38	0.680411	0.530023	7.33945	0.830799	2.12644
Meig1	0.679514	0.526195	25.6881	0.832832	15.8621
Ankub1	0.679145	0.606815	15.5963	0.751476	34.4828
Slc6a19	0.678647	0.54241	5.50459	0.814885	2.58621
4921536K21Rik	0.678608	0.67969	1.83486	0.677525	0.747126
Rsph1	0.678458	0.559354	37.6147	0.797562	18.046
Ttc16	0.678101	0.556419	6.42202	0.799783	10.4598
Calml4	0.677841	0.564816	21.1009	0.790866	8.04598
Nek11	0.677333	0.51828	24.7706	0.836385	32.5287
Kif6	0.675684	0.570633	33.945	0.780735	55.8621
Dydc2	0.674603	0.679751	6.42202	0.669455	3.67816
Iqub	0.673233	0.533156	22.0183	0.813309	24.0805
Fhad1	0.673001	0.491288	14.6789	0.854715	27.5862
Efhc1	0.669978	0.557143	15.5963	0.782814	10.2299
Dnajb13	0.669183	0.417899	11.9266	0.920467	5.4023
Nme5	0.669167	0.527985	37.6147	0.810348	37.4713
Riiad1	0.668412	0.500831	13.7615	0.835993	27.9885
Chil5	0.66735	0.642101	5.50459	0.6926	1.95402
Bbox1	0.667337	0.551482	34.8624	0.783192	28.4483
Gm16702	0.667171	0.499257	6.42202	0.835086	20.4598
Morn3	0.665999	0.481123	7.33945	0.850875	14.5977
Tmem232	0.665932	0.437526	22.0183	0.894337	39.7126
Plin5	0.665355	0.574108	4.58716	0.756602	2.29885
Stpg1	0.664469	0.48268	16.5138	0.846259	30.7471
Dlec1	0.663944	0.431933	6.42202	0.895955	9.65517
Cib4	0.663779	0.597003	2.75229	0.730555	1.26437
Efcab1	0.663709	0.602994	32.1101	0.724424	7.18391
Cfap100	0.663485	0.468919	14.6789	0.858052	24.9425
Hdc	0.662881	0.641711	29.3578	0.684051	3.44828
Gm1110	0.66038	0.408796	4.58716	0.911964	2.58621
Pih1d2	0.660328	0.412056	9.17431	0.9086	11.6092
Pi15	0.658946	0.456984	2.75229	0.860908	4.02299
Olah	0.658823	0.44889	6.42202	0.868757	5
Klrb1f	0.657966	0.540376	2.75229	0.775555	0.45977
Nek2	0.657947	0.52111	2.75229	0.794784	0.517241
Casc1	0.656933	0.467392	6.42202	0.846474	12.2989
Shank2	0.656769	0.488007	35.7798	0.825531	52.931
Klkb1	0.656099	0.384836	3.66972	0.927362	3.10345
Capsl	0.655915	0.517708	19.2661	0.794122	6.55172
Drc1	0.654855	0.474844	11.9266	0.834865	30.8621
Foxj1	0.654733	0.537232	65.1376	0.772233	10.0575
Nr1i2	0.653135	0.390329	2.75229	0.915941	2.01149
1300017J02Rik	0.652122	0.566028	25.6881	0.738216	12.5862
Saxo2	0.648894	0.579236	22.0183	0.718551	8.44828
Wdr78	0.645155	0.516527	44.9541	0.773784	27.5287
Ubxn10	0.644127	0.508291	24.7706	0.779963	5.11494
Nek10	0.644006	0.423451	11.0092	0.864561	17.5287
Kcnn4	0.643838	0.46936	11.0092	0.818317	6.09195
Spag16	0.642126	0.431308	52.2936	0.852945	78.2759
Dlx4	0.641996	0.464998	6.42202	0.818995	0.45977
Serinc2	0.641816	0.566106	7.33945	0.717525	1.72414
Fsip1	0.641762	0.527503	4.58716	0.756022	4.82759
Kif9	0.640848	0.46132	31.1927	0.820377	45.6897
Dnah2	0.640336	0.440498	29.3578	0.840175	47.4713
1700030J22Rik	0.640102	0.49646	7.33945	0.783743	5.11494
Ccdc30	0.638334	0.455635	31.1927	0.821033	48.3908
Ccdc78	0.636847	0.527531	10.0917	0.746162	16.6092
Dnaic2	0.636088	0.511528	25.6881	0.760648	9.36782
Stmnd1	0.635644	0.446456	3.66972	0.824833	1.03448
Uckl1os	0.633788	0.50112	6.42202	0.766456	7.98851
Plch1	0.631548	0.430632	17.4312	0.832465	25.1149
Ak8	0.630962	0.435438	13.7615	0.826486	10.977
Nuf2	0.63085	0.451332	5.50459	0.810367	3.27586
Catip	0.627298	0.409339	12.844	0.845257	15.5747
Defb23	0.627133	0.548131	2.75229	0.706135	1.03448
Dnah14	0.62653	0.414456	6.42202	0.838603	5.97701
Ccdc150	0.626462	0.418135	6.42202	0.834788	10
Tekt1	0.625735	0.473332	16.5138	0.778138	10.3448
Mns1	0.624859	0.441094	22.0183	0.808623	16.6092
1110017D15Rik	0.624513	0.625201	38.5321	0.623825	10.2299
Cep126	0.623576	0.473589	24.7706	0.773563	30.9195
Wnt11	0.623385	0.608285	8.25688	0.638485	0.517241
Npnt	0.623363	0.51772	11.9266	0.729006	6.66667
Kif27	0.621573	0.395591	13.7615	0.847555	15.977
Spag6l	0.621376	0.651294	39.4495	0.591458	39.6552
Slc14a2	0.619477	0.476714	35.7798	0.762239	6.03448
Gcnt1	0.618736	0.63807	13.7615	0.599403	3.16092
Cpn1	0.618477	0.400292	4.58716	0.836662	3.90805
Oxgr1	0.614879	0.551346	2.75229	0.678411	1.09195
Acot5	0.614431	0.352788	7.33945	0.876073	5.11494
Gramd2	0.614343	0.557741	6.42202	0.670946	2.12644
Mb	0.612348	0.456338	5.50459	0.768359	1.37931
Ppil6	0.611536	0.446702	30.2752	0.776369	36.4943
Nin	0.610538	0.502956	27.5229	0.71812	23.6782
Spata17	0.609748	0.393943	31.1927	0.825553	50.6897
Ccdc65	0.609662	0.410021	14.6789	0.809304	8.67816
1700007K13Rik	0.602138	0.38855	22.0183	0.815726	18.9655
Gm16157	0.601901	0.362529	3.66972	0.841273	2.06897
Hkdc1	0.598713	0.335038	5.50459	0.862388	4.02299
Lmntd1	0.598536	0.479655	9.17431	0.717417	27.5862
Efcab10	0.596156	0.584002	10.0917	0.60831	2.52874
Ubxn11	0.595287	0.448649	12.844	0.741925	26.3218
Lrrc9	0.594866	0.371695	23.8532	0.818038	34.6552
Stk33	0.594593	0.404196	18.3486	0.784991	30.7471
Ttll8	0.594266	0.406919	22.9358	0.781614	27.5287
Rd3	0.593377	0.563124	7.33945	0.62363	1.26437
Nr4a3	0.593306	0.463266	16.5138	0.723346	2.98851
Nfatc2	0.592738	0.782261	10.0917	0.403216	7.12644
Folr1	0.589956	0.386774	7.33945	0.793138	3.27586
Itga11	0.587514	0.342367	17.4312	0.832662	18.7931
Fam149a	0.586941	0.370265	21.1009	0.803617	16.3218
Fam167a	0.586328	0.415465	10.0917	0.757192	5.05747
Ccdc162	0.585284	0.419661	62.3853	0.750907	42.5287
Ccdc13	0.584382	0.51438	13.7615	0.654384	8.33333
Stk36	0.582671	0.434073	12.844	0.731268	11.0345
Wdr60	0.582319	0.484439	30.2752	0.6802	24.5402
Elmod1	0.582188	0.490457	44.0367	0.673919	32.2989
Iqgap2	0.582053	0.358193	19.2661	0.805913	30.4023
Lbp	0.581934	0.577281	20.1835	0.586587	3.96552
Mok	0.581408	0.410504	16.5138	0.752313	33.5057
D130043K22Rik	0.581122	0.42283	9.17431	0.739413	12.7011
1700003E16Rik	0.580516	0.400064	14.6789	0.760968	5.05747
Dusp14	0.580226	0.426214	14.6789	0.734238	2.52874
Slc28a3	0.578721	0.485383	11.9266	0.67206	1.83908
Dnah7c	0.577898	0.320946	22.0183	0.83485	28.6782
Iqcg	0.577682	0.350822	13.7615	0.804542	26.2644
Morn1	0.577137	0.434901	22.0183	0.719374	25.5747
Spa17	0.576364	0.486125	13.7615	0.666603	6.95402
Rarres2	0.574872	0.42435	14.6789	0.725393	28.5057
Crb2	0.57405	0.339928	19.2661	0.808172	11.6092
Armc2	0.572724	0.384036	22.9358	0.761411	37.8736
Ulk4	0.569233	0.412965	33.945	0.725501	39.4253
Tex26	0.569212	0.330428	4.58716	0.807995	3.04598
Rabl2	0.567936	0.468906	25.6881	0.666965	15.5747
Spag8	0.567086	0.298537	12.844	0.835635	8.04598
Nudt4	0.566533	0.487694	49.5413	0.645372	20.2299
Ccdc151	0.56595	0.372397	11.9266	0.759503	9.82759
Tex29	0.565704	0.380864	3.66972	0.750545	1.03448
1700088E04Rik	0.564968	0.347605	13.7615	0.782331	32.931
Dyrk3	0.564763	0.411683	9.17431	0.717842	3.16092
Morn5	0.564329	0.4371	8.25688	0.691558	3.50575
Adgrv1	0.564259	0.366334	39.4495	0.762184	47.7586
Aoc1	0.563536	0.434888	6.42202	0.692185	0.45977
Cd55	0.563408	0.472152	27.5229	0.654664	6.49425
Ccdc173	0.561296	0.391884	19.2661	0.730708	23.2184
Map3k19	0.56021	0.516216	13.7615	0.604204	20.7471
Lrriq3	0.559835	0.411194	4.58716	0.708477	5.51724
Klhl31	0.559818	0.476422	7.33945	0.643214	0.45977
Aebp1	0.559155	0.471333	51.3761	0.646977	19.4253
Sptlc3	0.559103	0.288663	1.83486	0.829543	13.3908
Dnah7a	0.558919	0.285518	15.5963	0.832319	29.1379
Ascc1	0.55797	0.476456	39.4495	0.639485	16.7241
Cd55b	0.556159	0.3243	5.50459	0.788017	1.2069
Pbx4	0.55463	0.368359	8.25688	0.740901	19.5977
Rnf138rt1	0.553875	0.435587	6.42202	0.672164	1.14943
Slc22a12	0.553702	0.305953	2.75229	0.801451	0.689655
Trp73	0.553309	0.365933	22.0183	0.740685	9.54023
Crocc	0.553191	0.380995	19.2661	0.725386	22.3563
Dnah1	0.552432	0.330888	12.844	0.773975	11.092
Lpar3	0.55003	0.401528	3.66972	0.698531	3.90805
Tmem107	0.548682	0.416408	22.9358	0.680955	15.1149
Fam183b	0.545145	0.458225	18.3486	0.632064	5.97701
Dusp18	0.544536	0.430987	24.7706	0.658085	4.94253
Syne1	0.54446	0.438646	58.7156	0.650275	77.5287
Fam227a	0.543649	0.371863	15.5963	0.715435	16.0345
Col5a3	0.543598	0.458375	11.0092	0.628821	9.77011
Scube3	0.543435	0.409544	12.844	0.677326	2.98851
Tm4sf1	0.542827	0.40382	71.5596	0.681835	27.2414
Barx2	0.542243	0.437164	11.9266	0.647322	6.49425
Cds1	0.542115	0.565591	28.4404	0.518639	8.56322
Gm11992	0.54149	0.260031	10.0917	0.822949	2.58621
Wdr31	0.541489	0.35625	10.0917	0.726727	8.21839
Bace2	0.540077	0.359062	18.3486	0.721093	14.9425
Tsga10	0.538763	0.397652	13.7615	0.679875	31.4368
Vit	0.536922	0.376838	31.1927	0.697006	24.7126
Ccdc96	0.534826	0.26176	9.17431	0.807892	1.95402
Ccdc114	0.529851	0.314478	30.2752	0.745225	8.7931
Cfap74	0.529839	0.345457	25.6881	0.714221	36.092
Eda2r	0.528617	0.513958	5.50459	0.543276	2.93103
Cep128	0.525647	0.358834	17.4312	0.692459	23.908
Cfap77	0.525506	0.211495	44.9541	0.839516	30.0575
Agbl3	0.525261	0.35097	31.1927	0.699552	29.5977
Kif11	0.524893	0.229507	17.4312	0.820279	4.31034
Rfx2	0.524177	0.301333	31.1927	0.747021	27.9885
Gm973	0.523678	0.361859	50.4587	0.685497	52.2414
Chek2	0.523176	0.427199	14.6789	0.619153	7.24138
Ttc9	0.522001	0.386476	20.1835	0.657527	7.01149
Rnase4	0.520452	0.538153	45.8716	0.50275	4.48276
4930405D11Rik	0.516254	0.419003	3.66972	0.613505	3.27586
Agbl4	0.51551	0.338981	43.1193	0.69204	87.0115
Zmynd12	0.514212	0.270916	8.25688	0.757507	12.0115
Cep83	0.512704	0.377996	14.6789	0.647411	26.7816
Spef1	0.51177	0.342363	5.50459	0.681176	3.7931
Kif24	0.510099	0.318542	9.17431	0.701655	16.7241
Lekr1	0.509445	0.272108	24.7706	0.746783	31.6667
Dnajc6	0.50895	0.402233	35.7798	0.615667	40.0575
Cdh7	0.508703	0.386085	13.7615	0.63132	11.8391
Zfand4	0.507728	0.436591	14.6789	0.578866	8.3908
Cfap46	0.507613	0.326199	28.4404	0.689026	46.3218
Dnal1	0.505907	0.288597	30.2752	0.723217	32.8161
Iqck	0.504904	0.256171	27.5229	0.753637	31.6092
Ift88	0.504251	0.355912	18.3486	0.65259	27.7586
Rph3al	0.503832	0.265095	7.33945	0.742569	11.092
Ttc12	0.503283	0.293646	18.3486	0.71292	15.5172
Clec3b	0.502417	0.410531	40.367	0.594302	6.89655
4430402I18Rik	0.501749	0.593481	14.6789	0.410017	17.4713
Ankrd45	0.49894	0.282661	12.844	0.715219	12.9885
Traf1	0.49864	0.194136	10.0917	0.803143	9.54023
Epb41l4a	0.497764	0.304202	17.4312	0.691326	17.2414
Ankrd44	0.496791	0.483647	23.8532	0.509934	30.7471
Slc43a3	0.495553	0.34996	4.58716	0.641145	1.55172
1700028P14Rik	0.495523	0.0693708	25.6881	0.921676	36.4368
Ankrd42	0.494699	0.287149	11.0092	0.70225	14.9425
Oscp1	0.494668	0.401133	30.2752	0.588203	17.5287
Lin7a	0.493522	0.302981	8.25688	0.684064	23.7356
Steap1	0.492121	0.418083	5.50459	0.566159	0.804598
Gm4876	0.49145	0.388693	14.6789	0.594206	43.5632
Calb1	0.491389	0.397014	23.8532	0.585764	9.31034
Pkp2	0.489017	0.457747	6.42202	0.520287	1.6092
Nnat	0.488504	0.35622	86.2385	0.620787	78.046
Espn	0.487969	0.352626	8.25688	0.623311	4.08046
Gad1os	0.487258	0.467441	7.33945	0.507075	0.747126
Glipr1l1	0.485681	0	2.75229	0.971363	6.72414
Pih1h3b	0.485161	0	6.42202	0.970323	7.93103
Wwc1	0.484911	0.391318	33.0275	0.578505	27.7011
Tmem108	0.484601	0.370692	32.1101	0.59851	46.6667
Gm17455	0.48421	0.329648	19.2661	0.638771	2.52874
Mia	0.484082	0.314399	18.3486	0.653765	0.632184
RP23-435E16.1	0.484022	0	0	0.968044	21.2069
1700013F07Rik	0.480995	0.26366	4.58716	0.69833	7.29885
Gm44109	0.480155	0	0	0.96031	4.1954
Ccdc171	0.480084	0.312891	18.3486	0.647278	23.5632
FRMPD2	0.479523	0	0	0.959047	31.2069
Bbof1	0.479011	0.33681	16.5138	0.621212	18.6207
Fbxo36	0.478675	0.309595	20.1835	0.647754	20.6897
Tmem67	0.478555	0.358523	26.6055	0.598586	10.6322
St8sia2	0.478106	0.41621	17.4312	0.540001	5.68966
Ccdc108	0.477578	0	0	0.955156	38.4483
Cfap58	0.477551	0	4.58716	0.955103	4.25287
Dydc1	0.477447	0	0.917431	0.954894	5.4023
Ldlrad2	0.476999	0.585178	3.66972	0.36882	0.45977
Cdhr4	0.476826	0.953652	15.5963	0	0
Scml4	0.476167	0.2561	4.58716	0.696234	9.08046
Slf1	0.47594	0.368022	32.1101	0.583858	29.3103
Rwdd3	0.47451	0.371605	5.50459	0.577415	6.32184
Styxl1	0.473167	0.235643	8.25688	0.71069	7.64368
Rassf4	0.470484	0.5594	14.6789	0.381569	2.70115
1600029I14Rik	0.469921	0.939842	15.5963	0	0
Dytn	0.469774	0	0.917431	0.939548	6.95402
9530026P05Rik	0.469584	0.385906	24.7706	0.553261	58.8506
6430531B16Rik	0.468795	0	0	0.93759	6.14943
Htr5b	0.468295	0.387576	3.66972	0.549015	1.03448
Gm15587	0.467654	0	0	0.935308	7.70115
Gm12695	0.467376	0	2.75229	0.934752	10.8621
Hsph1	0.466657	0.411237	44.9541	0.522076	19.8851
Fam126a	0.464727	0.402759	28.4404	0.526696	19.8276
Tcte1	0.46438	0	2.75229	0.92876	7.35632
Defb20	0.464128	0	1.83486	0.928255	1.03448
ENSMUSG00000110139	0.463906	0.927812	12.844	0	0
Cfap299	0.462868	0.925736	33.945	0	0
Lca5l	0.459473	0.206747	15.5963	0.7122	14.1954
Clec1b	0.458907	0	0	0.917814	1.89655
B3gnt4	0.458696	0	0	0.917392	4.5977
Olfr315	0.458427	0	0	0.916854	0.804598
Gm44145	0.458328	0	0	0.916656	1.6092
Gm28888	0.457953	0	0	0.915906	1.55172
Nup62cl	0.457826	0	2.75229	0.915652	2.29885
Rpgrip1l	0.45774	0.272078	14.6789	0.643402	14.3103
Gm43579	0.457184	0	0	0.914368	2.81609
Stox1	0.457136	0.245347	8.25688	0.668924	5.63218
Gm38037	0.456385	0	0	0.912771	4.13793
Erich3	0.456331	0.244402	12.844	0.668259	14.023
Smlr1	0.45632	0	0	0.91264	1.43678
Fam221a	0.456255	0.404833	4.58716	0.507677	1.09195
CN725425	0.456072	0	0	0.912144	2.52874
Tigd4	0.455736	0	0.917431	0.911473	3.50575
Gm17225	0.455032	0	0	0.910063	6.37931
ENSMUSG00000102420	0.455001	0.910003	10.0917	0	0
Gm12108	0.45491	0	0	0.909819	1.09195
Ttll10	0.454887	0	4.58716	0.909774	4.88506
1700007G11Rik	0.454869	0	0	0.909738	89.023
Ube2u	0.454574	0	3.66972	0.909147	9.77011
Ect2l	0.454489	0	2.75229	0.908979	21.4943
Ttc30b	0.454409	0.383306	40.367	0.525512	2.93103
Defb30	0.453771	0	0	0.907543	1.49425
Baiap2	0.45298	0.277856	18.3486	0.628105	16.0345
A430108G06Rik	0.451987	0.903974	5.50459	0	0
Dnah7b	0.451957	0.233132	33.945	0.670782	43.908
Sap30bpos	0.451894	0	0	0.903787	2.75862
Tas2r113	0.451302	0.902603	5.50459	0	0
Gm10440	0.451057	0	0.917431	0.902115	2.70115
Tbc1d31	0.450872	0.323038	9.17431	0.578706	11.2069
F11	0.450683	0	0.917431	0.901367	2.64368
Gm17250	0.450155	0	0	0.900309	0.862069
Nmb	0.447464	0.502156	13.7615	0.392772	2.47126
Gm1661	0.44718	0	0	0.894361	16.2644
Nipal2	0.447155	0.242963	12.844	0.651346	16.7241
Gm13481	0.446577	0	0	0.893155	39.9425
Gas2l2	0.446436	0	2.75229	0.892872	2.70115
Tacc2	0.446387	0.339482	16.5138	0.553291	16.7816
ENSMUSG00000051606	0.445608	0.891217	37.6147	0	0
Gm33104	0.444987	0.889973	4.58716	0	0
March10	0.44474	0	3.66972	0.889479	6.32184
4930547M16Rik	0.44363	0	0	0.88726	6.09195
Gm42722	0.443593	0	0	0.887186	44.7126
Arsj	0.443484	0.458029	6.42202	0.42894	2.64368
Cd24a	0.443383	0.472482	36.6972	0.414283	6.89655
Gm15821	0.443211	0	0	0.886422	0.747126
Wdr35	0.443192	0.31546	32.1101	0.570924	15.2299
Gm41230	0.443059	0.886118	22.9358	0	0
Osbpl3	0.442495	0.223294	14.6789	0.661695	12.1839
Slc39a4	0.442433	0	0.917431	0.884866	0.862069
Ankef1	0.441909	0	3.66972	0.883817	7.18391
Lama3	0.441436	0.18592	4.58716	0.696951	6.26437
Gm16188	0.44116	0	0	0.882319	1.32184
Gm11264	0.44086	0	0	0.881719	0.977011
Ptx4	0.440339	0	0	0.880678	0.402299
Efcab6	0.440101	0	6.42202	0.880203	16.4943
Ccdc191	0.440028	0.277057	14.6789	0.602999	32.8736
Frmpd2	0.439997	0.879995	22.0183	0	0
Hipk1	0.43949	0.343952	56.8807	0.535028	22.931
Gm16158	0.439305	0	0	0.878611	1.78161
Zswim2	0.439186	0	0	0.878372	1.09195
ENSMUSG00000087117	0.43843	0.876859	4.58716	0	0
Gm42806	0.438231	0	0	0.876462	0.747126
Zp3	0.438049	0	2.75229	0.876097	4.82759
Iqcd	0.437135	0	4.58716	0.874269	22.4713
Gm33050	0.436659	0	0	0.873318	0.632184
Ccdc189	0.436621	0.325215	10.0917	0.548027	3.21839
Pklr	0.436463	0	0	0.872925	2.01149
2610028H24Rik	0.436251	0	1.83486	0.872502	0.862069
Gm26887	0.435208	0	0	0.870416	4.42529
Vmn2r43	0.43436	0	0.917431	0.868721	0.344828
Gm16130	0.434286	0	0	0.868572	0.747126
SDR42E2	0.434102	0	0	0.868205	3.73563
Hirip3	0.432928	0.372024	11.9266	0.493832	4.77011
Marc1	0.432899	0	3.66972	0.865799	4.08046
Gm15841	0.431763	0	0	0.863527	0.517241
Awat2	0.431228	0	1.83486	0.862457	4.94253
Gm14280	0.430925	0	0	0.861851	5.86207
Csmd1	0.429914	0.34216	33.945	0.517668	82.6437
1810020O05Rik	0.42965	0	0	0.859301	3.56322
Slc35g3	0.42965	0	0	0.859299	0.977011
Mzb1	0.428982	0	0.917431	0.857965	0.977011
Gm42902	0.428949	0	0	0.857898	2.58621
Rnf183	0.428771	0	0	0.857542	0.287356
Bbc3	0.428764	0.422283	6.42202	0.435244	2.47126
Gm9978	0.428726	0	0	0.857451	0.632184
Fancd2os	0.428631	0	0.917431	0.857262	0.517241
Barhl1	0.428287	0	0.917431	0.856575	1.37931
BC030867	0.427345	0	3.66972	0.854689	4.1954
1700037C18Rik	0.426994	0.413769	7.33945	0.44022	3.21839
Smim6	0.426889	0	0	0.853778	1.66667
Ribc2	0.426589	0	1.83486	0.853178	4.5977
Gm37974	0.4264	0	0	0.8528	0.287356
Srl	0.426266	0.259757	9.17431	0.592776	6.49425
Ptgr1	0.426163	0.282152	9.17431	0.570173	0.747126
Ift80	0.425425	0.279889	27.5229	0.57096	10.9195
Rp1	0.424787	0	6.42202	0.849573	7.64368
Fam159a	0.424574	0	0	0.849149	4.88506
Gtsf1l	0.424143	0	0	0.848286	0.287356
Wdr19	0.423837	0.299048	23.8532	0.548627	8.96552
Vmn2r35	0.423638	0	5.50459	0.847276	4.77011
Cadps2	0.422847	0.412842	15.5963	0.432852	13.2759
Fam179a	0.421926	0	0	0.843852	21.092
Gm43458	0.421521	0	0	0.843041	2.52874
Dcdc2b	0.420847	0.341288	7.33945	0.500406	5.51724
Arhgap39	0.420544	0.437663	27.5229	0.403425	27.7586
Il6ra	0.419606	0.35233	11.9266	0.486881	10.6322
Cfap53	0.419352	0	8.25688	0.838705	10.1149
Gm29266	0.418895	0	0	0.837789	25.1149
Ddo	0.418321	0.221962	30.2752	0.61468	18.6207
Gm43153	0.418226	0	0	0.836452	0.862069
Zc2hc1c	0.418121	0.3142	9.17431	0.522042	0.91954
Ift81	0.417964	0.210241	30.2752	0.625688	29.1379
Celsr1	0.417931	0.0509285	32.1101	0.784934	9.77011
1700040L02Rik	0.417877	0	0	0.835755	22.1264
Gm42809	0.417793	0	0	0.835585	0.229885
Arhgef33	0.417726	0	5.50459	0.835451	12.9885
Rsph10b	0.417471	0	0	0.834942	35.6322
Wdr27	0.417414	0	7.33945	0.834828	7.75862
Dync2h1	0.416594	0.265676	36.6972	0.567512	34.1379
Calcoco2	0.416555	0	1.83486	0.83311	1.03448
Acap1	0.416518	0	2.75229	0.833037	4.42529
Chaf1a	0.415945	0	1.83486	0.831889	3.44828
4921507G05Rik	0.415776	0	0	0.831553	1.6092
1700001L19Rik	0.415449	0.449465	4.58716	0.381434	1.83908
Rnf144b	0.415242	0.363811	13.7615	0.466674	10.3448
BC021785	0.41519	0	0	0.83038	0.229885
Dchs2	0.414915	0	7.33945	0.82983	17.8161
F730035M05Rik	0.414774	0	0	0.829549	1.6092
Pygl	0.414732	0.414142	11.0092	0.415323	2.75862
ENSMUSG00000092573	0.414564	0.829128	12.844	0	0
ENSMUSG00000086353	0.414449	0.828897	9.17431	0	0
Gfod2	0.414413	0.325249	20.1835	0.503577	16.8391
Gm26911	0.414304	0	0	0.828607	4.94253
ENSMUSG00000094280	0.414122	0.828245	7.33945	0	0
Thegl	0.41344	0	0	0.826881	2.18391
Malrd1	0.41341	0.346873	16.5138	0.479948	4.36782
Gm20383	0.413312	0	0.917431	0.826624	2.06897
2210408I21Rik	0.413259	0.227285	15.5963	0.599233	48.2759
ENSMUSG00000092175	0.413139	0.826278	5.50459	0	0
BC049715	0.412839	0	0.917431	0.825678	2.52874
Gm10000	0.412751	0	0	0.825502	0.229885
Acot6	0.412672	0	6.42202	0.825345	13.2759
Gm7173	0.412524	0	0	0.825047	33.2184
Megf6	0.412472	0.270887	7.33945	0.554057	5.34483
1700010H22Rik	0.411904	0	0	0.823809	0.229885
Mrgprx2	0.411871	0	0	0.823742	0.804598
ENSMUSG00000109654	0.411507	0.823015	13.7615	0	0
4931429I11Rik	0.4115	0	0	0.823	7.35632
Elof1	0.41083	0.348671	33.0275	0.472989	9.88506
Mamdc2	0.410131	0	20.1835	0.820263	10.5172
Arhgap18	0.409834	0.321069	26.6055	0.498598	19.7701
Atp8b4	0.409266	0.443249	5.50459	0.375283	1.14943
Lrrc48	0.40895	0	0	0.817901	32.5287
Lyrm1	0.408867	0.340285	12.844	0.47745	10.6322
Gm26626	0.408635	0	0	0.81727	0.172414
Cyp2j7	0.408365	0	0	0.81673	0.574713
ENSMUSG00000111058	0.407489	0.814978	5.50459	0	0
Caps2	0.407054	0	2.75229	0.814108	3.90805
Tat	0.406729	0	0.917431	0.813458	0.172414
1700041M19Rik	0.406718	0	0.917431	0.813436	2.41379
Rab36	0.406487	0.202033	18.3486	0.610941	17.8736
Gm14507	0.406411	0	0	0.812822	2.35632
Eef2k	0.406251	0.318725	18.3486	0.493777	17.8736
Ikzf3	0.40612	0	0	0.81224	1.09195
Samt3	0.406101	0	0	0.812202	0.172414
Dpep2	0.405882	0	0	0.811764	4.65517
Bicc1	0.405694	0.341131	40.367	0.470256	28.908
Sec24d	0.40552	0.212013	22.9358	0.599027	20.5172
Endog	0.405418	0	0.917431	0.810836	29.9425
Hc	0.405276	0	8.25688	0.810552	3.3908
G6b	0.405256	0	0	0.810512	0.172414
Kcnn3	0.404929	0.119412	20.1835	0.690446	22.5287
Cntrl	0.404704	0.38096	12.844	0.428449	10.2299
Gm17135	0.404675	0	0	0.809351	21.2644
Gm10032	0.404651	0	0	0.809303	0.574713
6530403H02Rik	0.404327	0	0	0.808655	11.1494
Ccdc34	0.404169	0.290431	22.9358	0.517908	9.82759
Ttll3	0.40413	0.121901	22.0183	0.686358	40.2874
Atp2b4	0.403933	0.268798	32.1101	0.539068	15.3448
Prrg4	0.403795	0	2.75229	0.807591	7.93103
Hspa2	0.403538	0.373292	22.0183	0.433784	4.77011
Tango6	0.403397	0.269244	16.5138	0.537551	12.8736
ENSMUSG00000086831	0.403234	0.806468	5.50459	0	0
Gcnt2	0.403191	0.279301	15.5963	0.527081	15.4023
Gm28380	0.402905	0	0	0.805811	0.402299
Gm28100	0.402852	0	0	0.805705	0.574713
Gm14372	0.402305	0	0	0.804611	1.78161
Cd36	0.401936	0	2.75229	0.803873	3.21839
Gm16083	0.401902	0	0	0.803805	39.1379
Bbs7	0.401552	0.272337	14.6789	0.530766	12.6437
Ccdc67	0.401368	0	0	0.802735	2.41379
Prrt1	0.400383	0.227049	21.1009	0.573716	17.7011
Dcdc2a	0.399723	0.185641	29.3578	0.613804	18.3908
Pvalb	0.399503	0.799006	6.42202	0	2.01149
ENSMUSG00000087204	0.398976	0.797953	2.75229	0	0
Gm16325	0.398524	0	0	0.797048	1.2069
Serpini2	0.397792	0	0.917431	0.795585	0.804598
Nek1	0.397469	0.25684	20.1835	0.538098	29.1379
Gm9780	0.397362	0.422214	12.844	0.37251	0.114943
C230072F16Rik	0.39729	0.79458	34.8624	0	0
Dapl1	0.397079	0	0.917431	0.794159	3.90805
March4	0.395803	0	3.66972	0.791606	17.9885
Cetn4	0.394625	0.26364	22.9358	0.525611	5.22989
Ccdc88c	0.393762	0.24741	20.1835	0.540114	11.954
Myoz2	0.393612	0.787224	2.75229	0	0.402299
Mipep	0.393446	0.237587	22.9358	0.549306	9.54023
Ccdc24	0.39279	0	0	0.78558	1.78161
Gm38096	0.392541	0	0	0.785082	0.45977
4932443I19Rik	0.392232	0	0	0.784464	17.069
Gpr55	0.39206	0	5.50459	0.784121	0.804598
Plekha2	0.391585	0.279121	15.5963	0.504049	11.954
Anapc1	0.391293	0.283901	47.7064	0.498686	22.5862
ENSMUSG00000106093	0.391005	0.782011	21.1009	0	0
Gm26832	0.390025	0	0	0.78005	0.344828
Nkx6-1	0.389782	0	0.917431	0.779563	4.94253
Ptprh	0.389505	0	0	0.779009	1.78161
Wdr90	0.388999	0	5.50459	0.777997	7.70115
4930598A11Rik	0.388961	0	0	0.777923	1.6092
Samd13	0.388637	0	0	0.777275	3.10345
3300002A11Rik	0.388462	0	0	0.776924	67.4713
Grhl3	0.388192	0	0	0.776385	1.03448
Amotl2	0.38748	0.375095	16.5138	0.399865	5.8046
Trappc8	0.387433	0.292096	33.0275	0.482771	22.8736
Cd109	0.387081	0	21.1009	0.774163	7.47126
Kdelr3	0.386474	0.429135	9.17431	0.343814	0.977011
4933408J17Rik	0.386302	0	0	0.772603	0.344828
Gm38509	0.386092	0	0	0.772184	0.517241
Rsph3b	0.3859	0.175226	22.0183	0.596574	6.83908
Ift74	0.385779	0.164919	23.8532	0.60664	21.2644
9530036O11Rik	0.385718	0	3.66972	0.771436	25.2874
Gm44368	0.385543	0	0	0.771086	0.632184
Glb1l2	0.385495	0	4.58716	0.770989	1.83908
4930469G21Rik	0.385392	0	0	0.770784	5.11494
Gm3294	0.385057	0	0	0.770113	8.04598
Cfap99	0.384852	0	9.17431	0.769703	13.8506
Pde6h	0.384465	0	0.917431	0.76893	3.73563
Gm5458	0.383658	0	0	0.767315	0.344828
Gm26777	0.38363	0	0	0.767261	8.21839
Gm26776	0.383513	0	0	0.767027	1.32184
Fbxo43	0.382659	0	0	0.765319	0.402299
Hspa4l	0.382356	0.269691	55.0459	0.495021	21.7241
RP24-492L15.6	0.382333	0	0	0.764667	0.344828
Pgpep1l	0.382308	0	1.83486	0.764617	6.6092
Slc25a31	0.382208	0	0	0.764416	2.06897
Klhdc7a	0.381265	0.448826	4.58716	0.313704	1.72414
Efcab2	0.381216	0.144498	20.1835	0.617935	17.5862
Cuzd1	0.380933	0.761867	6.42202	0	0
ENSMUSG00000107287	0.380877	0.761753	2.75229	0	0
Gm42800	0.38065	0	0	0.7613	0.344828
Kcnh3	0.380119	0	1.83486	0.760239	2.06897
Gm6999	0.3796	0	0	0.7592	3.16092
Ttc8	0.379485	0.184079	31.1927	0.574891	37.5287
E130006D01Rik	0.379262	0	0	0.758524	2.58621
Vmn2r28	0.378742	0	0	0.757485	0.689655
Gm26801	0.378225	0	0	0.756449	1.43678
Chchd6	0.37819	0.244438	17.4312	0.511943	16.4368
Rsph9	0.378028	0.266387	22.0183	0.48967	8.44828
Otop2	0.377906	0	0	0.755812	0.402299
Wdr73	0.377798	0.272578	16.5138	0.483019	10.1724
Olfr1507	0.377797	0	0	0.755594	0.45977
Crb1	0.377545	0	1.83486	0.755089	8.62069
Tmem231	0.377081	0.331402	17.4312	0.422759	3.33333
Lrrc45	0.377059	0.28047	10.0917	0.473647	13.5632
Serpinb6e	0.377044	0.754088	2.75229	0	0.0574713
Trp53bp2	0.376687	0.158487	18.3486	0.594887	17.0115
Clec9a	0.375597	0	0	0.751194	2.01149
Kctd8	0.375232	0.221368	8.25688	0.529095	27.5287
Arx	0.375156	0	0	0.750311	0.517241
Tbata	0.375028	0	0.917431	0.750057	1.14943
Ccdc39	0.374598	0	5.50459	0.749195	16.3793
Ccdc110	0.374584	0	0	0.749168	2.52874
E130111B04Rik	0.374304	0	0	0.748607	1.89655
D930032P07Rik	0.374091	0	1.83486	0.748182	3.56322
Ccdc187	0.373966	0.411757	15.5963	0.336175	0.689655
Chrdl2	0.373934	0	1.83486	0.747867	1.03448
Gm12162	0.373777	0	0	0.747554	0.344828
Lrrc56	0.37355	0	3.66972	0.747099	5.11494
ENSMUSG00000092272	0.373158	0.746317	22.9358	0	0
Smgc	0.372963	0	0	0.745927	0.402299
Slco1a5	0.372243	0	1.83486	0.744486	1.6092
Cers6	0.371719	0.27063	20.1835	0.472809	13.8506
Rfx3	0.371089	0.17544	39.4495	0.566738	59.2529
Ccdc148	0.370527	0	17.4312	0.741053	43.7356
Ttc39d	0.370466	0	0.917431	0.740933	4.94253
Gtf2a1l	0.370197	0	0	0.740393	0.804598
Gm17202	0.369776	0	0	0.739553	4.48276
ENSMUSG00000096668	0.369321	0.738642	5.50459	0	0
Stxbp4	0.368955	0.26747	43.1193	0.470439	21.7816
Kif19a	0.368891	0	3.66972	0.737783	9.08046
B9d1	0.368743	0.389073	23.8532	0.348412	3.67816
Bphl	0.368726	0.230361	27.5229	0.507091	11.5517
Gm11770	0.368611	0	0	0.737221	0.804598
Gm13497	0.368444	0	0.917431	0.736888	2.06897
Rps2-ps6	0.367629	0	0	0.735258	0.402299
Lyg2	0.367583	0	0	0.735167	0.689655
Gm14505	0.367456	0	0	0.734911	1.09195
Efcab12	0.367383	0	7.33945	0.734767	9.54023
Gm15857	0.367366	0	0	0.734731	0.287356
Cx3cr1	0.367282	0.642101	57.7982	0.0924625	4.48276
Gm42791	0.367172	0	0	0.734344	2.52874
Rnf150	0.366937	0.256724	14.6789	0.477151	13.4483
Ttll13	0.366677	0	2.75229	0.733354	4.25287
Lrrc51	0.36646	0	7.33945	0.73292	23.5057
Gm595	0.366419	0	0	0.732838	0.229885
Gm12474	0.36627	0	0	0.732539	1.14943
ENSMUSG00000115388	0.365581	0.731162	10.0917	0	0
Lca5	0.365442	0	9.17431	0.730884	21.0345
BC021891	0.365082	0	0	0.730163	0.747126
Gm16006	0.364997	0	0	0.729993	0.977011
Gm16630	0.364245	0	0.917431	0.72849	1.09195
Mycbpap	0.36338	0	13.7615	0.726759	17.5287
Glb1l3	0.363052	0	0.917431	0.726105	0.862069
Gm37381	0.362883	0	0	0.725765	1.03448
Gas6	0.362632	0.324524	52.2936	0.40074	14.8851
Gm26908	0.362538	0	0	0.725077	21.2069
Gm42951	0.36246	0	0	0.72492	0.517241
2810047C21Rik1	0.362315	0.724629	10.0917	0	0
Ccdc3	0.362134	0	0	0.724268	9.5977
Gnaz	0.361996	0	11.0092	0.723992	14.8276
Agbl2	0.361229	0	18.3486	0.722458	6.49425
Gm11099	0.361026	0	0	0.722053	16.2069
Rdh10	0.360799	0.30879	22.9358	0.412808	5.22989
Fbxo15	0.36051	0	2.75229	0.72102	0.862069
Ephx4	0.360504	0	5.50459	0.721009	5.51724
Crygn	0.359946	0	1.83486	0.719892	2.87356
Kndc1	0.359862	0.469632	14.6789	0.250091	13.2759
Fam161b	0.359611	0.212367	11.0092	0.506856	3.62069
ENSMUSG00000105389	0.359538	0.719076	4.58716	0	0
E530001K10Rik	0.359399	0	0	0.718799	5.51724
K230010J24Rik	0.359299	0	0	0.718597	8.85057
Gpc4	0.358898	0.262476	12.844	0.45532	6.32184
ENSMUSG00000086769	0.358336	0.716672	1.83486	0	0
Katnal2	0.357957	0	11.0092	0.715915	23.6782
Gm43902	0.357922	0	0	0.715845	1.2069
D430042O09Rik	0.357122	0.193636	14.6789	0.520609	19.9425
Agr3	0.356646	0	0	0.713293	0.804598
Sp9	0.356491	0	0.917431	0.712982	0.862069
Gm30332	0.355992	0	0	0.711985	0.402299
Kctd1	0.355873	0.138844	25.6881	0.572902	19.7701
Xrra1	0.355639	0	0	0.711277	2.18391
Mfsd6l	0.355535	0	0	0.71107	0.287356
Scai	0.35526	0.218725	24.7706	0.491795	27.4138
Fbxo16	0.355092	0	5.50459	0.710183	7.01149
Ift140	0.35468	0.267533	14.6789	0.441827	10.7471
Smkr-ps	0.354587	0	0	0.709173	6.89655
Fhod3	0.354523	0.144782	5.50459	0.564264	12.931
A830011K09Rik	0.354453	0	0	0.708905	0.862069
Clic6	0.354185	0.588205	4.58716	0.120166	0.977011
Ttll9	0.354169	0	3.66972	0.708337	12.8736
Apbb2	0.354024	0.322414	48.6239	0.385633	43.046
Gm13830	0.353887	0	0	0.707774	23.3333
Mapkbp1	0.353882	0.273886	21.1009	0.433878	9.71264
Treml1	0.353624	0	0	0.707247	1.14943
Cldn2	0.353034	0.256119	6.42202	0.449948	0.287356
Nkapl	0.352607	0.397573	2.75229	0.307641	1.49425
4933407L21Rik	0.352439	0	8.25688	0.704878	3.96552
Bdkrb1	0.352118	0	0.917431	0.704237	0.804598
4930444P10Rik	0.352007	0	2.75229	0.704013	3.21839
Acss3	0.351285	0.103718	18.3486	0.598853	31.092
Cdc14a	0.350941	0.166691	11.9266	0.535192	18.6782
Ttc28	0.350829	0.216016	40.367	0.485642	47.4713
BC106179	0.350724	0	0.917431	0.701447	0.862069
Gramd1c	0.350548	0	9.17431	0.701096	8.73563
ENSMUSG00000114664	0.349896	0.699792	1.83486	0	0
Gm15675	0.348818	0	0	0.697637	3.21839
ENSMUSG00000110977	0.348103	0.696207	7.33945	0	0
Ccdc158	0.347786	0	1.83486	0.695571	2.47126
Lrrc52	0.347772	0	0.917431	0.695545	0.344828
Wdyhv1	0.34744	0.26046	18.3486	0.434419	7.93103
St3gal6	0.346809	0.285038	41.2844	0.408581	23.1034
4921523L03Rik	0.345877	0	0	0.691754	0.574713
4933406C10Rik	0.345627	0	3.66972	0.691254	8.50575
3110083C13Rik	0.344834	0	0	0.689669	3.50575
Smoc2	0.344691	0.388006	10.0917	0.301376	2.01149
Strbp	0.344511	0.234793	37.6147	0.454229	69.7701
Man1a	0.344487	0.20131	21.1009	0.487664	21.1494
Plxnb2	0.344467	0.230226	64.2202	0.458708	8.3908
5530401A14Rik	0.344449	0	0	0.688899	2.47126
Ccdc138	0.343115	0	7.33945	0.686229	22.8161
Pcp4l1	0.342953	0.222352	66.055	0.463553	15.5172
4921506M07Rik	0.342742	0	0	0.685485	2.01149
ENSMUSG00000110586	0.342671	0.685341	1.83486	0	0
Synpo2	0.342644	0	22.9358	0.685287	21.8391
1110032A03Rik	0.34204	0.146276	17.4312	0.537803	14.5977
Gm5432	0.341199	0	0	0.682399	5.22989
Pcsk2	0.340953	0.402449	29.3578	0.279457	14.1954
1700026L06Rik	0.340793	0	0	0.681586	2.01149
Rfx1	0.339328	0.349945	14.6789	0.328712	3.67816
Cdkl1	0.339324	0	0.917431	0.678647	4.1954
Gm16555	0.339155	0	0	0.67831	0.574713
Armc9	0.337447	0.169152	20.1835	0.505743	17.6437
Gm29296	0.337412	0	0	0.674825	0.91954
Pcsk4	0.337203	0	6.42202	0.674406	3.21839
1700016G14Rik	0.337001	0	0	0.674002	1.09195
Ccpg1os	0.336989	0	7.33945	0.673978	7.18391
Sft2d1	0.33692	0	11.0092	0.67384	35.4598
Gm43003	0.336606	0	0	0.673211	0.517241
Clca3a1	0.336266	0	0.917431	0.672532	1.09195
Slc24a4	0.336192	0	1.83486	0.672384	6.72414
Dyx1c1Ccpg1	0.336146	0	0	0.672291	6.03448
ENSMUSG00000101615	0.336023	0.672047	3.66972	0	0
Dlx4os	0.335834	0	0.917431	0.671668	0.977011
Map3k21	0.335758	0.671516	1.83486	0	0
Gm15728	0.33518	0	0	0.67036	2.64368
Eea1	0.335126	0.2284	20.1835	0.441852	18.7931
Gm12326	0.334897	0	0	0.669795	16.4943
Adam5	0.334667	0	4.58716	0.669334	3.56322
Cspp1	0.333858	0.164471	26.6055	0.503246	42.4138
Clcn4	0.33366	0.12827	48.6239	0.53905	19.023
Tram2	0.333549	0.371036	8.25688	0.296063	3.04598
Cerkl	0.33349	0	1.83486	0.666979	5.68966
Ptpn14	0.333408	0.372931	11.0092	0.293885	4.65517
Tnfsf18	0.333358	0.666716	1.83486	0	0.114943
ENSMUSG00000115146	0.333223	0.666446	5.50459	0	0
Sntg2	0.333074	0	2.75229	0.666147	6.6092
Gm10138	0.332164	0	0	0.664328	4.02299
Fbxw10	0.331675	0	1.83486	0.66335	6.6092
ENSMUSG00000075569	0.331191	0.662382	18.3486	0	0
Gm42884	0.330861	0	0	0.661721	1.43678
C130083M11Rik	0.330829	0	0	0.661657	0.402299
Ngef	0.330114	0.32147	21.1009	0.338758	8.56322
Nphp4	0.329454	0	6.42202	0.658908	8.85057
ENSMUSG00000108286	0.329182	0.658365	1.83486	0	0
Sctr	0.329075	0	5.50459	0.658149	9.54023
Rnf32	0.329052	0	8.25688	0.658104	15.2874
4930458D05Rik	0.328885	0	0	0.65777	1.89655
Myocd	0.327857	0	0	0.655714	1.49425
5430427M07Rik	0.327787	0	0	0.655575	1.78161
Myo7a	0.327779	0	48.6239	0.655558	6.6092
Gm13703	0.32777	0	0	0.65554	1.83908
Mctp2	0.327545	0	0.917431	0.65509	3.04598
St3gal2	0.327099	0.235454	29.3578	0.418744	9.88506
ENSMUSG00000115207	0.326633	0.653265	1.83486	0	0
Taco1os	0.326556	0	0	0.653113	4.88506
C2cd3	0.326245	0.150875	24.7706	0.501615	21.4368
Ctsh	0.325906	0.327751	21.1009	0.324062	6.32184
Prtn3	0.325562	0	1.83486	0.651123	4.36782
Acbd7	0.325423	0	0.917431	0.650846	0.632184
RP23-133N24.2	0.325352	0	0	0.650703	5.74713
D830044I16Rik	0.325294	0	0	0.650589	1.72414
Wrn	0.325078	0.220679	12.844	0.429478	14.7701
Glis3	0.324803	0	16.5138	0.649606	57.1264
Lgals3	0.324344	0	3.66972	0.648689	1.83908
Gm10941	0.324262	0	0.917431	0.648525	1.83908
Tsku	0.323516	0	3.66972	0.647033	2.98851
Anxa8	0.323419	0.646837	1.83486	0	0.344828
Thg1l	0.323376	0	0.917431	0.646753	2.64368
Ptprn2	0.323187	0.220375	10.0917	0.425999	20.9195
Gm32389	0.32268	0.64536	2.75229	0	0
Sobp	0.32225	0.183001	37.6147	0.461498	36.8391
Galk2	0.321938	0	18.3486	0.643875	25.0575
Fbxo17	0.321801	0.306448	5.50459	0.337154	2.41379
9230110C19Rik	0.321799	0	0	0.643598	9.48276
Anxa11	0.321514	0	9.17431	0.643028	7.64368
Gnal	0.32109	0.143608	15.5963	0.498571	12.8161
Cxcr4	0.320988	0.077079	22.9358	0.564896	1.55172
Gm2087	0.320921	0	0.917431	0.641842	15.5747
Tsix	0.320869	0	0	0.641737	0.91954
Hs3st6	0.320551	0	0.917431	0.641102	0.804598
1700010K24Rik	0.319723	0	0	0.639446	7.81609
Iqch	0.3195	0	3.66972	0.639001	9.5977
Odf2l	0.319424	0	9.17431	0.638847	17.1264
Stk3	0.319139	0.143688	22.0183	0.494591	31.6092
Gm20662	0.319116	0	0	0.638233	0.45977
Atxn1	0.3191	0.143179	33.945	0.49502	68.046
Gm1818	0.318984	0	0	0.637967	0.344828
Rpgr	0.318658	0	14.6789	0.637317	16.2644
Ttc26	0.318305	0	11.0092	0.63661	12.5862
Cep55	0.317614	0.635229	1.83486	0	0
Gdf7	0.31719	0.63438	1.83486	0	0
4930429D17Rik	0.316364	0	0	0.632728	0.862069
Tmem219	0.316237	0.149484	14.6789	0.48299	12.6437
Gm43938	0.316222	0	0	0.632443	11.6667
1810010H24Rik	0.316179	0	5.50459	0.632358	2.70115
Gm10643	0.316144	0	0	0.632288	1.09195
Ccdc74a	0.316123	0	11.0092	0.632245	4.48276
Gm11508	0.3148	0	0	0.629601	8.33333
Fstl4	0.3147	0	2.75229	0.629399	14.2529
ENSMUSG00000092624	0.314075	0.62815	1.83486	0	0
1700026J14Rik	0.313854	0	0.917431	0.627707	0.632184
Gm15689	0.313688	0	0	0.627377	0.689655
Mpp1	0.313482	0.262641	31.1927	0.364322	5.17241
Thbs3	0.313298	0	5.50459	0.626597	14.9425
Gm11190	0.312745	0	0	0.62549	0.344828
Ccdc57	0.31254	0	10.0917	0.62508	24.5977
Cyb561	0.312527	0.271586	18.3486	0.353468	5.68966
ENSMUSG00000108483	0.312371	0.624742	1.83486	0	0
Hrk	0.312013	0	10.0917	0.624026	5.05747
D630039A03Rik	0.311945	0	4.58716	0.623889	1.37931
4933405D12Rik	0.311841	0	0	0.623682	2.75862
5830408C22Rik	0.311798	0.623596	3.66972	0	0
Speer2	0.31172	0	0	0.623441	0.45977
Styk1	0.311364	0	0	0.622728	1.37931
ENSMUSG00000090623	0.311229	0.622457	1.83486	0	0
Spata6	0.311173	0.113521	23.8532	0.508825	14.8276
Cep89	0.311119	0	7.33945	0.622239	15.2874
2700033N17Rik	0.31097	0	0	0.62194	1.55172
1700029J07Rik	0.310849	0	10.0917	0.621697	9.71264
Ankk1	0.310832	0	0.917431	0.621665	0.689655
B530045E10Rik	0.310554	0	0	0.621108	1.26437
Rbm24	0.310393	0	12.844	0.620787	3.44828
Ky	0.310355	0	7.33945	0.620711	6.43678
Mdm1	0.309497	0	6.42202	0.618995	5.22989
Nrg4	0.309249	0	2.75229	0.618497	2.93103
Wdpcp	0.309236	0.102144	43.1193	0.516329	28.7356
Trpc6	0.308934	0	1.83486	0.617868	2.06897
Spata24	0.308617	0	7.33945	0.617235	9.54023
Gm44276	0.308299	0	0	0.616598	0.45977
Spp2	0.30826	0.61652	3.66972	0	0.172414
Gm28727	0.308229	0	0	0.616457	6.2069
Gm12027	0.307624	0	0	0.615249	0.977011
Bbs9	0.307575	0.224494	41.2844	0.390656	25.2874
Bmp8a	0.307455	0	0.917431	0.61491	0.632184
Atp8b5	0.307281	0	6.42202	0.614561	5.68966
Dmd	0.307224	0.167515	56.8807	0.446934	83.2184
Gm28694	0.307145	0	0	0.61429	0.632184
ENSMUSG00000085922	0.306894	0.613788	11.0092	0	0
Dmc1	0.306695	0	1.83486	0.61339	3.27586
Intu	0.306439	0	10.0917	0.612878	7.93103
Arl13b	0.306434	0.118332	22.9358	0.494535	13.7356
Casz1	0.306406	0	2.75229	0.612812	4.25287
1500015O10Rik	0.306356	0	0	0.612712	8.27586
Kcnma1	0.306214	0.237738	23.8532	0.37469	40.2874
Vmn2r41	0.306157	0.612314	1.83486	0	0.229885
ENSMUSG00000090849	0.306157	0.612314	1.83486	0	0
Ccnd2	0.306151	0.240444	33.0275	0.371858	5.51724
Cyp4v3	0.304597	0	9.17431	0.609194	8.27586
Lmo3	0.303997	0	10.0917	0.607994	8.16092
Dalrd3	0.303693	0	5.50459	0.607386	30.2874
Col26a1	0.303402	0	0.917431	0.606804	7.41379
1700041G16Rik	0.303155	0	0	0.60631	3.56322
Wdr95	0.303154	0	3.66972	0.606308	2.70115
Tceal3	0.302913	0	10.0917	0.605826	14.2529
Gm5087	0.30277	0	1.83486	0.605541	3.96552
Gdf5	0.30263	0.60526	1.83486	0	0.114943
Gm10421	0.302267	0.604533	1.83486	0	0
Gabre	0.302142	0	0.917431	0.604283	0.977011
Pik3c2g	0.302033	0	0	0.604065	1.03448
Polk	0.301727	0.199787	15.5963	0.403667	13.5632
ENSMUSG00000097120	0.301571	0.603143	11.0092	0	0
Pqlc1	0.301401	0.182081	8.25688	0.420721	4.13793
9330179D12Rik	0.301302	0	9.17431	0.602603	3.90805
ENSMUSG00000114646	0.300893	0.601786	8.25688	0	0
Plekha7	0.300556	0	12.844	0.601111	19.023
Gm9725	0.300415	0	0	0.600829	3.67816
Fgf7	0.300253	0	0.917431	0.600505	0.91954
Tmem45b	0.299449	0	2.75229	0.598897	1.03448
Trim37	0.299248	0.0914122	23.8532	0.507083	22.931
Vmn2r31	0.299089	0	0.917431	0.598178	0.287356
Uhrf1bp1	0.298527	0.308523	10.0917	0.288532	3.33333
Gm26671	0.298172	0	1.83486	0.596345	3.50575
Tbc1d32	0.297923	0	19.2661	0.595846	21.2069
T2	0.297703	0.595405	17.4312	0	0
Pth2r	0.297418	0	0	0.594836	1.03448
Fam188b	0.296446	0	0	0.592893	10.8046
Klhl41	0.296261	0	0.917431	0.592521	1.09195
Prelp	0.295705	0.159894	82.5688	0.431517	7.81609
1700020G17Rik	0.295544	0	0.917431	0.591087	1.2069
Etfa	0.295527	0.161001	47.7064	0.430052	24.9425
Ift172	0.295366	0.193747	17.4312	0.396985	8.7931
Proser3	0.294667	0	1.83486	0.589334	5.63218
Cfap65	0.294427	0.588854	51.3761	0	0
Dixdc1	0.29393	0.223555	17.4312	0.364306	15.9195
4930402F06Rik	0.29358	0	0	0.58716	0.229885
Vmn1r4	0.293114	0	2.75229	0.586228	1.2069
P2rx6	0.293022	0	11.0092	0.586043	9.77011
Rasgrp1	0.29286	0	0.917431	0.58572	2.24138
2610301B20Rik	0.292858	0	18.3486	0.585715	11.8966
Hspa1b	0.292525	0.454116	12.844	0.130934	0.402299
Itga2b	0.292365	0	7.33945	0.58473	5.57471
Zbed5	0.292287	0	8.25688	0.584574	2.29885
BB365896	0.291983	0	0	0.583967	0.689655
ENSMUSG00000069825	0.291066	0.582132	1.83486	0	0
Pdlim3	0.290192	0	0.917431	0.580384	1.32184
Cnksr2	0.289966	0	8.25688	0.579933	14.9425
D430041D05Rik	0.289653	0	6.42202	0.579307	15.9195
Fsd1l	0.289625	0.132415	19.2661	0.446835	11.4943
Acr	0.289582	0	0.917431	0.579163	1.26437
4930578M01Rik	0.289336	0	4.58716	0.578671	4.71264
Gpr35	0.289307	0	0.917431	0.578614	2.12644
Grk4	0.289183	0	4.58716	0.578366	22.9885
Gm11734	0.289031	0	0	0.578061	1.37931
Efhc2	0.288633	0	6.42202	0.577265	6.03448
Drc3	0.287881	0.575762	43.1193	0	0
ENSMUSG00000094736	0.28771	0.57542	6.42202	0	0
Esrrg	0.287533	0	5.50459	0.575066	42.1264
Tchh	0.287529	0	0	0.575057	1.32184
Cd59b	0.28737	0	8.25688	0.574741	4.65517
Gm5103	0.286918	0	0.917431	0.573835	0.229885
Rcc2	0.286771	0.241562	14.6789	0.33198	5.8046
Gm16230	0.286382	0	0	0.572765	5
2810029C07Rik	0.285841	0	3.66972	0.571682	3.50575
Rbpms	0.285685	0.109103	20.1835	0.462267	19.4828
Ttll5	0.285384	0.17436	16.5138	0.396409	26.5517
Cep290	0.285344	0	11.9266	0.570689	18.046
Apobec4	0.285212	0	0	0.570423	6.55172
Ruvbl2	0.285188	0.216306	10.0917	0.35407	2.64368
4930509E16Rik	0.285179	0	0	0.570358	0.45977
Actn1	0.28506	0.178804	22.0183	0.391317	7.24138
Ezr	0.284644	0.0439488	48.6239	0.525338	7.41379
Hoxb13	0.284453	0	0	0.568906	0.229885
Adam22	0.28409	0.111608	21.1009	0.456572	28.7931
Anxa1	0.284033	0	1.83486	0.568067	2.12644
Klb	0.283833	0	2.75229	0.567666	1.6092
Gm29508	0.283291	0	5.50459	0.566581	1.78161
Sco2	0.282916	0	0	0.565833	6.89655
D8Ertd82e	0.282881	0	0	0.565763	19.5402
Adck4	0.28281	0	0	0.565619	20
Abca16	0.282582	0.565164	6.42202	0	0.0574713
Gm15541	0.282179	0	0	0.564358	0.804598
Gm26619	0.281842	0	0	0.563684	0.229885
Kazn	0.281751	0.293755	22.9358	0.269746	14.8851
Prm3	0.281535	0	0	0.563071	0.172414
Mfsd7b	0.281444	0	0	0.562889	13.4483
Mat1a	0.280057	0	0	0.560113	0.172414
Synm	0.279348	0.244693	22.0183	0.314004	4.88506
Gm11513	0.279248	0	0	0.558496	0.172414
Ccdc64	0.278869	0	0	0.557738	8.3908
Tex9	0.278447	0	7.33945	0.556894	13.7356
Krt18	0.278078	0	0.917431	0.556156	0.517241
Rhpn1	0.277746	0	1.83486	0.555491	3.21839
Pawr	0.277481	0	4.58716	0.554961	13.8506
Tfr2	0.277425	0.55485	5.50459	0	0.45977
ENSMUSG00000096413	0.277139	0.554278	4.58716	0	0
4930550C14Rik	0.276869	0	3.66972	0.553738	2.24138
Cep41	0.276743	0	5.50459	0.553486	3.7931
Pitpnm3	0.276576	0	8.25688	0.553152	7.93103
Sclt1	0.275884	0.106365	22.9358	0.445403	25.977
Hsp90aa1	0.275706	0.253403	95.4128	0.298009	25.5172
Fat2	0.275554	0	5.50459	0.551108	0.804598
T	0.2755	0	0	0.551	0.172414
Lypla2	0.275355	0.236395	19.2661	0.314314	6.6092
ENSMUSG00000085526	0.275331	0.550661	7.33945	0	0
Med9os	0.275321	0	3.66972	0.550642	0.977011
Lrrc19	0.275176	0	0	0.550352	11.1494
P4ha3	0.274923	0	3.66972	0.549845	3.62069
Dok6	0.274811	0.219115	8.25688	0.330506	23.908
Sorbs2os	0.274623	0	0	0.549247	10
Capn3	0.274484	0.548967	2.75229	0	0.747126
Fam229b	0.274461	0	5.50459	0.548922	14.5977
Bmp6	0.274315	0.192533	20.1835	0.356098	10.7471
Pacrg	0.274116	0	16.5138	0.548232	58.6782
Fam161a	0.27403	0	2.75229	0.54806	4.71264
Cfap97d2	0.273922	0.547845	22.0183	0	0
Cd27	0.273839	0	0	0.547679	31.5517
Mettl21c	0.273726	0	0	0.547451	0.45977
Ppm1e	0.273374	0.120643	24.7706	0.426105	31.7241
Phka2	0.273134	0.23224	12.844	0.314028	7.58621
Faah	0.272755	0.288218	11.0092	0.257292	4.54023
A830018L16Rik	0.272516	0	3.66972	0.545032	10.9195
Psmc3ip	0.27246	0	4.58716	0.54492	1.83908
Sptan1	0.272347	0.17233	55.0459	0.372363	25.4598
Cutal	0.272125	0	2.75229	0.54425	1.55172
Ccdc160	0.271799	0	3.66972	0.543598	3.10345
Cntnap5c	0.271741	0	5.50459	0.543483	10.6897
Fras1	0.271363	0.47003	9.17431	0.0726972	1.83908
Ildr1	0.271186	0	0	0.542371	0.747126
Gm11767	0.271062	0	0	0.542125	0.517241
Nipal3	0.270561	0.221513	22.9358	0.319608	7.75862
Gm15886	0.270289	0	0	0.540578	6.43678
Dgat2	0.270146	0.540292	35.7798	0	1.95402
Crip3	0.269884	0	0.917431	0.539767	1.26437
Ang	0.269217	0.538435	8.25688	0	0
Gm28154	0.269129	0	0	0.538259	0.747126
Zc2hc1a	0.268567	0.110983	21.1009	0.426151	15.2874
Edar	0.26853	0	0	0.53706	0.574713
6430584L05Rik	0.268085	0	2.75229	0.53617	0.517241
4931429P17Rik	0.267341	0	0	0.534683	0.862069
ENSMUSG00000107191	0.267119	0.534238	2.75229	0	0
Gm28989	0.26689	0	0	0.53378	0.689655
Cdk17	0.266817	0.0678242	32.1101	0.46581	26.2644
Slc23a4	0.266083	0.532166	2.75229	0	0
Frem2	0.266061	0	9.17431	0.532121	6.26437
Wfdc3	0.266011	0	0.917431	0.532023	0.747126
Rsph3a	0.265843	0	16.5138	0.531687	5.51724
Fitm2	0.265727	0.22474	16.5138	0.306715	2.87356
Bub1	0.265613	0.531227	7.33945	0	0
Gm16853	0.265515	0	0.917431	0.531029	1.32184
Flnc	0.26525	0	19.2661	0.530499	4.08046
Serpinb6b	0.265198	0.35616	8.25688	0.174236	0.689655
Tbx4	0.264984	0	0	0.529968	0.287356
Nck2	0.264981	0	22.0183	0.529963	22.3563
RP23-89C10.5	0.264883	0	0	0.529765	3.04598
Esyt2	0.264563	0.0883639	31.1927	0.440762	25.8046
Adam3	0.264127	0	0	0.528254	0.574713
Spef1l	0.26412	0.52824	2.75229	0	0
Sncaip	0.263966	0	5.50459	0.527932	20.1149
Kcnc2	0.263956	0	10.0917	0.527911	25.8621
ENSMUSG00000093675	0.263682	0.527364	6.42202	0	0
ENSMUSG00000089653	0.26366	0.527321	2.75229	0	0
Casd1	0.26327	0	17.4312	0.526541	20
Arvcf	0.263243	0	21.1009	0.526485	14.6552
Cphx3	0.263044	0	0.917431	0.526088	4.94253
Mpl	0.263016	0	0	0.526032	3.85057
4930432B10Rik	0.262836	0	0	0.525672	5.4023
Mchr1	0.262718	0.525436	2.75229	0	0.402299
Slc16a12	0.262619	0.268873	8.25688	0.256364	2.98851
Jazf1	0.262523	0	5.50459	0.525045	15.9195
Dzip1l	0.261797	0	6.42202	0.523595	6.78161
Bok	0.261714	0.175612	11.9266	0.347816	4.02299
Fam89a	0.261451	0.356277	6.42202	0.166626	0.689655
4732463B04Rik	0.261431	0	0	0.522862	2.01149
Bbs1	0.261277	0	15.5963	0.522554	3.62069
RP23-85B15.7	0.261257	0	0	0.522514	0.977011
Tmprss2	0.260775	0.521549	3.66972	0	0.747126
Cfap20	0.260744	0.0748917	29.3578	0.446596	16.2644
Sag	0.260306	0	0	0.520612	2.12644
ENSMUSG00000045709	0.26028	0.520559	8.25688	0	0
Aqp1	0.260212	0	0.917431	0.520425	0.45977
Axdnd1	0.26012	0	2.75229	0.52024	2.24138
Rbm43	0.260074	0.267094	7.33945	0.253054	2.01149
LOC102635948	0.259961	0.519922	12.844	0	0
Gm6288	0.25978	0	0	0.51956	0.747126
Baz1a	0.259776	0	3.66972	0.519552	6.78161
Enkd1	0.259486	0	2.75229	0.518971	2.93103
Tmem194	0.258786	0	0	0.517572	6.72414
9330158H04Rik	0.258772	0.517544	2.75229	0	0.804598
Mob3b	0.258497	0.0437279	47.7064	0.473265	40.8046
Gclc	0.258401	0.0143551	29.3578	0.502447	15.5747
Slc41a2	0.258107	0.196519	6.42202	0.319694	4.25287
Gm10549	0.258048	0	0	0.516096	0.45977
Mtus2	0.257722	0	6.42202	0.515444	11.7241
1700082M22Rik	0.257404	0	0	0.514807	0.632184
Gm15726	0.256978	0	0	0.513957	1.2069
4930567H12Rik	0.256974	0.513949	2.75229	0	0
Ift122	0.256481	0	20.1835	0.512961	17.0115
Lama5	0.256411	0.133909	4.58716	0.378913	2.75862
Lrmp	0.256296	0	0	0.512593	1.03448
Efcab7	0.255917	0	1.83486	0.511834	7.47126
Mxra8	0.255873	0.0260601	34.8624	0.485685	6.72414
Vmn2r40	0.255604	0.511208	2.75229	0	0.0574713
Dzank1	0.255597	0	18.3486	0.511194	19.4253
BC026585	0.255524	0	0	0.511048	8.04598
Trim68	0.255385	0	5.50459	0.510771	3.90805
Slc14a1	0.254915	0	13.7615	0.50983	5.97701
Mzf1	0.254741	0	1.83486	0.509483	4.1954
Rapgef3os2	0.254455	0	0	0.50891	1.03448
Rgs11	0.254392	0	2.75229	0.508785	8.56322
Reln	0.25435	0	50.4587	0.508701	27.6437
Tenm3	0.254346	0	16.5138	0.508693	38.908
Slc39a9	0.254102	0.154984	33.945	0.35322	10.2874
Fbxw9	0.253805	0	7.33945	0.507611	6.55172
Dnaaf5	0.253452	0	8.25688	0.506905	5.11494
Cacna1d	0.253091	0	10.0917	0.506181	28.3908
Dph6	0.253002	0.139	17.4312	0.367005	9.94253
Gm30524	0.25293	0	1.83486	0.50586	1.26437
Dnaja4	0.252673	0	0	0.505347	4.88506
Otud3	0.252635	0	0	0.505269	1.37931
Mro	0.252575	0	19.2661	0.505149	21.1494
Csrnp3	0.252503	0	9.17431	0.505007	25.977
Coq4	0.252415	0	5.50459	0.504831	6.03448
Gm17359	0.252302	0	0.917431	0.504604	15.8621
Gm28411	0.252245	0	0	0.504491	5.74713
Xist	0.251846	0	0	0.503691	0.977011
Gm16503	0.251163	0	0	0.502327	1.89655
Pltp	0.251052	0	3.66972	0.502103	30.2299
ENSMUSG00000109885	0.2508	0.501599	2.75229	0	0
Neurl2	0.250418	0	3.66972	0.500836	1.95402
Mthfd1l	0.250339	0	10.0917	0.500678	12.7586
Nlrp4e	0.250322	0.500644	4.58716	0	0.0574713
Cdk6	0.250282	0	1.83486	0.500563	9.1954
Bank1	0.250214	0	1.83486	0.500428	5.74713
Pcnxl4	0.250063	0	0	0.500125	11.092
ENSMUSG00000081179	0.249878	0.499756	1.83486	0	0
ENSMUSG00000097890	0.249817	0.499634	8.25688	0	0
Ppl	0.2497	0	0	0.4994	0.689655
Slc38a1	0.249612	0	70.6422	0.499223	38.7356
Col4a1	0.249387	0.22101	19.2661	0.277764	4.42529
ENSMUSG00000097924	0.249231	0.498463	2.75229	0	0
Mybl2	0.248945	0	0.917431	0.497889	1.37931
G630016G05Rik	0.248874	0	3.66972	0.497748	5.63218
Gm35911	0.248862	0	0	0.497723	0.689655
Ddx54	0.248785	0.49757	5.50459	0	0.689655
Cachd1	0.248381	0.0516344	42.2018	0.445128	30.9195
4930444A19Rik	0.248178	0	0	0.496355	7.41379
ENSMUSG00000033731	0.248077	0.496155	2.75229	0	0
Wdr34	0.247077	0	11.9266	0.494153	11.3218
Fzd3	0.246793	0	39.4495	0.493586	16.4943
Plaat1	0.246767	0.493534	10.0917	0	0
ENSMUSG00000083192	0.246522	0.493043	3.66972	0	0
Zc3h6	0.245648	0	12.844	0.491296	15.1724
Gm14964	0.245129	0	0	0.490258	24.8851
Adamts16	0.245097	0	5.50459	0.490193	5.74713
9530077C05Rik	0.244746	0	8.25688	0.489492	7.47126
Fam81a	0.244372	0	15.5963	0.488744	4.88506
Ddr1	0.244364	0.182841	73.3945	0.305887	23.3333
Sdccag8	0.244315	0	21.1009	0.488629	29.0805
C230037L18Rik	0.243501	0	0	0.487002	7.64368
Capn6	0.24337	0.48674	5.50459	0	0.804598
Ccdc80	0.24332	0	11.0092	0.48664	9.08046
Lmln	0.243183	0	8.25688	0.486366	9.36782
Cdk14	0.242899	0.153008	28.4404	0.332789	32.5287
Slc22a2	0.242776	0.485553	2.75229	0	0.0574713
Gm15564	0.242717	0	0	0.485434	1.89655
Bbs5	0.242534	0	9.17431	0.485067	9.88506
Unc13d	0.242314	0	2.75229	0.484628	1.66667
Fndc1	0.242203	0	1.83486	0.484406	2.64368
Atp2b1	0.241797	0.190044	40.367	0.29355	24.7126
Gm34099	0.241352	0.482704	2.75229	0	0
RP23-205F19.4	0.24117	0	0	0.48234	0.977011
Tjp3	0.241002	0	0	0.482005	0.689655
ENSMUSG00000086170	0.240908	0.481817	2.75229	0	0
Tmem116	0.240889	0	5.50459	0.481778	5.68966
Gm15908	0.240848	0.481695	2.75229	0	0
Mkrn1	0.240446	0.22824	30.2752	0.252652	8.04598
Fgfr1op	0.240076	0	6.42202	0.480153	6.89655
Tub	0.23976	0	10.0917	0.479519	8.90805
Agbl5	0.239439	0	0	0.478878	5.68966
4930452B06Rik	0.239157	0	1.83486	0.478314	2.18391
Acox2	0.238953	0	3.66972	0.477906	0.804598
Kcnip4	0.23884	0.0948578	22.0183	0.382823	53.5632
Ankrd6	0.238766	0	12.844	0.477532	19.3678
A330033J07Rik	0.238725	0	0	0.477451	13.5632
Wnt4	0.238706	0	20.1835	0.477411	5
Ikbke	0.238622	0	0	0.477244	3.3908
A830010M20Rik	0.238543	0	9.17431	0.477085	1.14943
Spaca9	0.238314	0.476628	5.50459	0	0
Dcdc5	0.238236	0.476472	25.6881	0	0
Mpdz	0.237974	0.0821357	30.2752	0.393812	16.4368
Vmn2r33	0.237466	0.474931	3.66972	0	0.172414
Gm17276	0.23735	0	0	0.474701	9.08046
Gm20618	0.237163	0	0	0.474325	0.632184
Rasa4	0.237149	0	7.33945	0.474297	7.70115
Tagln2	0.237027	0.193381	24.7706	0.280674	5.8046
Klhl3	0.237011	0	6.42202	0.474021	7.24138
Fam186a	0.236987	0	0.917431	0.473974	2.12644
Kcnmb2	0.236826	0	2.75229	0.473653	7.06897
Ccdc154	0.236273	0.472545	2.75229	0	0.0574713
Nme7	0.23599	0	8.25688	0.471979	9.42529
Sumo1	0.235728	0	32.1101	0.471456	43.5632
Nxn	0.235625	0.0468198	42.2018	0.424431	38.7931
1810062G17Rik	0.235333	0	0	0.470666	1.09195
Tex50	0.235182	0.470363	5.50459	0	0
Gm44206	0.235151	0	0	0.470302	3.16092
BC051142	0.235057	0	6.42202	0.470114	4.94253
Slc35d1	0.234844	0	22.9358	0.469687	15.7471
Rasef	0.234755	0	0.917431	0.469509	0.804598
Mroh8	0.23435	0	0.917431	0.4687	1.66667
Cdr1os	0.234175	0.468349	14.6789	0	0
Zdhhc1	0.234142	0	5.50459	0.468284	13.5632
Arhgap6	0.233905	0	0.917431	0.46781	25.6897
Tmem71	0.233529	0	0	0.467059	1.49425
Kif26b	0.233344	0	10.0917	0.466688	14.4253
Klhdc9	0.233264	0	0	0.466529	2.29885
Gm2716	0.232929	0	0	0.465859	0.45977
Ccdc157	0.232588	0	21.1009	0.465176	8.10345
Lztfl1	0.232163	0	14.6789	0.464326	14.3103
Mcm6	0.232156	0	6.42202	0.464312	3.04598
Pax6os1	0.231728	0	0	0.463457	1.6092
RP24-120F8.4	0.231454	0	0	0.462907	6.78161
Syngap1	0.231336	0	5.50459	0.462672	4.71264
Dpcd	0.231274	0.218309	21.1009	0.24424	7.47126
Cacnb2	0.231169	0	45.8716	0.462338	56.5517
Anxa2	0.231025	0.0914777	34.8624	0.370573	10.4598
Ckap5	0.23081	0.0983439	56.8807	0.363276	32.8736
Cdh12	0.230764	0	3.66972	0.461527	13.7356
Gm42649	0.230751	0	0	0.461502	2.12644
Eda	0.230723	0	1.83486	0.461447	15.8046
1700105P06Rik	0.230526	0	0	0.461051	1.03448
Pbld2	0.230342	0	0	0.460683	4.71264
ENSMUSG00000112246	0.230277	0.460553	2.75229	0	0
Olfr316	0.230276	0.460551	1.83486	0	0
Plekha5	0.230192	0	21.1009	0.460385	35.2874
Tmem53	0.230022	0	5.50459	0.460044	7.58621
Igsf3	0.229979	0	13.7615	0.459958	7.35632
Gm4890	0.22989	0	0	0.459781	2.98851
Rps6ka2	0.229176	0	11.0092	0.458351	13.5057
Cep164	0.229083	0	6.42202	0.458165	12.6437
Mettl20	0.229016	0	0	0.458033	6.09195
Dnajc3	0.228968	0.174164	50.4587	0.283772	11.0345
Stpg2	0.228848	0	3.66972	0.457696	4.77011
2610044O15Rik8	0.228516	0	2.75229	0.457033	6.26437
ENSMUSG00000091557	0.228334	0.456668	1.83486	0	0
Gm26805	0.227842	0	0	0.455683	0.91954
Cdkl2	0.227829	0	9.17431	0.455657	5.74713
Rnf114	0.227539	0	14.6789	0.455079	13.1609
Layn	0.227345	0.0784504	1.83486	0.376239	3.33333
Ctxn1	0.227323	0	25.6881	0.454646	5.05747
Dynlt1c	0.227191	0	0	0.454382	4.08046
Galc	0.227141	0	25.6881	0.454281	10.4023
Cmss1	0.226882	0	3.66972	0.453763	13.1034
Oard1	0.226617	0.212286	19.2661	0.240949	3.33333
Gm26534	0.226472	0	0	0.452944	3.21839
Zfp777	0.226164	0.21771	12.844	0.234618	4.31034
Gpr19	0.226134	0.164819	18.3486	0.287449	7.52874
Synpr	0.226026	0	8.25688	0.452052	13.6782
Zfp704	0.225941	0	26.6055	0.451882	23.6782
Catsperg1	0.225931	0	2.75229	0.451862	1.95402
Slc25a21	0.22574	0	11.0092	0.45148	14.0805
Dbi	0.225695	0.121687	93.578	0.329703	37.5287
4930505A04Rik	0.22509	0	0.917431	0.450179	1.66667
Casq2	0.225007	0.0303693	3.66972	0.419645	2.87356
Igsf9	0.224727	0.449454	3.66972	0	1.43678
Glipr1l3	0.224614	0.449228	1.83486	0	0
Spata7	0.224254	0	14.6789	0.448508	19.7701
Ttll4	0.22415	0	9.17431	0.4483	12.4138
Uchl1os	0.224113	0	1.83486	0.448227	2.12644
Gsr	0.223805	0.137973	22.0183	0.309637	6.72414
Shank3	0.223679	0.0523882	7.33945	0.394971	5.57471
Col23a1	0.223565	0	3.66972	0.447131	11.4943
RP24-445D7.2	0.223366	0	0	0.446732	3.10345
Oaz3	0.223195	0	3.66972	0.446391	1.2069
Inpp5k	0.223151	0	6.42202	0.446301	13.5632
Batf3	0.222674	0	0	0.445348	1.37931
1700034H15Rik	0.222614	0	0	0.445227	0.91954
Itgb3bp	0.222244	0	6.42202	0.444489	22.6437
Pask	0.222185	0	0	0.44437	2.29885
Cald1	0.22215	0.132689	26.6055	0.31161	19.9425
9030617O03Rik	0.221878	0	0	0.443756	7.01149
ENSMUSG00000105789	0.221864	0.443729	4.58716	0	0
Fhl1	0.221846	0.186311	48.6239	0.257381	7.29885
Cdk20	0.221829	0	5.50459	0.443657	3.56322
Tpte	0.221692	0	1.83486	0.443383	1.49425
Sema3e	0.221482	0	8.25688	0.442964	15.9195
Ccbe1	0.22148	0	10.0917	0.44296	8.62069
Tctn1	0.22139	0	5.50459	0.442781	4.82759
Pyroxd2	0.221185	0	3.66972	0.44237	1.78161
Crnde	0.221102	0	1.83486	0.442203	4.48276
Palm2	0.221086	0	0	0.442173	24.8276
Cabcoco1	0.220999	0.441999	15.5963	0	0
Tmem138	0.220883	0	6.42202	0.441765	7.58621
Irs1	0.220882	0	8.25688	0.441765	14.5977
Cchcr1	0.220799	0	0.917431	0.441598	2.87356
Azin2	0.220649	0	5.50459	0.441299	7.01149
Bbs12	0.22058	0	0.917431	0.441159	3.90805
Dner	0.220497	0	30.2752	0.440993	26.3793
Sgsm1	0.220221	0	19.2661	0.440441	10.8046
Spice1	0.219931	0	11.9266	0.439862	5.8046
Ccdc190	0.219902	0	8.25688	0.439804	13.9655
4732414G09Rik	0.219835	0	1.83486	0.439669	1.43678
Cmtm8	0.219695	0.12101	7.33945	0.318381	3.67816
Gabrg3	0.21958	0	11.9266	0.43916	33.908
Prc1	0.218754	0.437507	5.50459	0	0.574713
Clu	0.218656	0.157906	82.5688	0.279405	38.4483
Rad50	0.218623	0.213635	13.7615	0.223612	5.8046
ENSMUSG00000085363	0.218613	0.437227	3.66972	0	0
Cep162	0.218597	0	15.5963	0.437194	9.71264
Cd80	0.218582	0	0	0.437163	1.95402
D3Ertd751e	0.218437	0	15.5963	0.436875	22.4713
Zfp772	0.218325	0	3.66972	0.436651	2.29885
Nxpe4	0.21822	0	21.1009	0.436441	11.7816
Gm19299	0.21814	0.436281	4.58716	0	0
Mapk10	0.217779	0.0371025	42.2018	0.398455	48.3908
Spag1	0.217681	0	5.50459	0.435363	6.55172
Hist1h4h	0.217371	0	0	0.434741	2.06897
ENSMUSG00000107978	0.217348	0.434696	1.83486	0	0
Vmn2r113	0.217244	0	0	0.434488	0.344828
Gm28905	0.217182	0	0	0.434364	4.71264
Cfap300	0.216847	0.433694	19.2661	0	0
Fam185a	0.216644	0	6.42202	0.433289	4.77011
Stard6	0.216604	0	2.75229	0.433209	3.56322
ENSMUSG00000113299	0.216558	0.433115	1.83486	0	0
Tmem132b	0.216521	0.0926049	26.6055	0.340438	17.5862
Shisa6	0.215982	0	6.42202	0.431965	11.3218
St8sia1	0.215843	0	5.50459	0.431686	7.24138
Lmod1	0.215607	0	0.917431	0.431215	1.95402
Zbtb7c	0.21554	0	6.42202	0.43108	12.069
Pard6b	0.215447	0	1.83486	0.430895	0.804598
Sox5os4	0.215344	0	0	0.430688	12.7586
ENSMUSG00000112599	0.215267	0.430534	1.83486	0	0
Gm26981	0.215212	0	0	0.430425	5.34483
Ralgps2	0.214899	0	11.9266	0.429798	17.2989
Iffo2	0.214507	0	10.0917	0.429015	2.18391
5330413P13Rik	0.214464	0.428928	3.66972	0	0
Clnk	0.214379	0	0.917431	0.428757	1.72414
Ivns1abp	0.214269	0.225802	23.8532	0.202736	6.2069
1700003F12Rik	0.214106	0	0	0.428213	1.43678
1110004E09Rik	0.213802	0	0	0.427605	4.77011
Enah	0.213688	0.147174	55.0459	0.280202	32.9885
Serhl	0.213588	0.321302	4.58716	0.105875	2.70115
Gm12353	0.213556	0	0	0.427112	14.3678
Gm28501	0.213519	0	0	0.427039	3.16092
A430073D23Rik	0.213141	0	0	0.426282	6.32184
Hist1h2be	0.213096	0	0	0.426191	12.1839
Ehbp1l1	0.213033	0.126354	11.0092	0.299711	3.73563
Tctn3	0.212971	0	10.0917	0.425942	4.1954
Sycp3	0.212544	0	3.66972	0.425088	29.7701
Pcolce2	0.21251	0.425019	4.58716	0	1.26437
Bdh2	0.212289	0	9.17431	0.424579	4.77011
Rnf152	0.212147	0	3.66972	0.424294	6.95402
1700112D23Rik	0.211981	0	0	0.423961	3.56322
Epb41l4b	0.211509	0	11.0092	0.423018	12.3563
Nudc	0.211367	0.234956	27.5229	0.187778	8.96552
Spats2l	0.211235	0	14.6789	0.422469	12.9885
Pdgfa	0.21122	0	22.0183	0.42244	9.54023
Nubpl	0.211118	0	7.33945	0.422235	8.73563
ENSMUSG00000099137	0.211112	0.422223	2.75229	0	0
Pou6f1	0.21099	0	14.6789	0.421979	15.1149
Cdkl3	0.210909	0	0.917431	0.421818	13.2184
ENSMUSG00000085398	0.210904	0.421808	11.0092	0	0
Ccdc17	0.210546	0	2.75229	0.421093	1.95402
Adamtsl3	0.210342	0.420685	5.50459	0	1.2069
Tmem17	0.210109	0	8.25688	0.420218	4.65517
Nhlrc4	0.210056	0.420111	2.75229	0	0
Gm10419	0.210023	0	0	0.420047	4.31034
Gm26632	0.209865	0	0	0.41973	3.04598
Klhl32	0.209785	0	27.5229	0.41957	21.7816
Paics	0.20978	0.184786	60.5505	0.234774	4.36782
Tmem47	0.209652	0.00485866	68.8073	0.414446	24.2529
Ap3m2	0.209314	0	14.6789	0.418628	7.01149
Gm15402	0.209266	0	0	0.418532	0.632184
Ankrd29	0.20922	0	6.42202	0.41844	4.77011
Nrbp2	0.208952	0	33.945	0.417905	26.6667
Fbxl2	0.208794	0	11.9266	0.417588	14.1954
Hs6st3	0.208467	0	1.83486	0.416934	17.8161
Fmn2	0.208426	0	39.4495	0.416852	50.5172
Nphp1	0.208325	0	11.0092	0.41665	6.78161
Prtg	0.208273	0	4.58716	0.416546	11.7241
Prr18	0.208154	0.416309	7.33945	0	0
Ccdc181	0.208118	0	6.42202	0.416235	3.10345
Gm17259	0.208097	0	0	0.416195	2.81609
Scn7a	0.208081	0	0	0.416162	2.29885
Lix1	0.207678	0	9.17431	0.415355	6.83908
Srsf10	0.207575	0	12.844	0.415149	18.1609
Wwox	0.20756	0	22.0183	0.41512	63.2759
Ildr2	0.207506	0.128734	44.0367	0.286277	8.62069
Pde6d	0.207419	0	25.6881	0.414838	11.3218
Otof	0.207282	0	1.83486	0.414563	2.06897
Antxr2	0.206993	0	11.0092	0.413987	5.74713
Ttl	0.20695	0	12.844	0.4139	7.24138
Sox9	0.206538	0.0395318	72.4771	0.373543	10
Wdr62	0.206525	0	0.917431	0.413051	2.75862
Mttp	0.206506	0	16.5138	0.413012	14.3103
Pycrl	0.206363	0	7.33945	0.412726	5.45977
Cep112	0.206342	0	5.50459	0.412685	19.3678
Thap3	0.206237	0	11.9266	0.412474	33.908
Gm42997	0.206208	0	0	0.412416	2.18391
Poli	0.206076	0	4.58716	0.412152	2.35632
Pamr1	0.20583	0	16.5138	0.411661	6.14943
Scn3b	0.205399	0	6.42202	0.410798	5.34483
Kbtbd11	0.205329	0.0426031	16.5138	0.368055	5.51724
Wwtr1	0.205305	0	13.7615	0.41061	22.8161
Gm32950	0.205216	0	0	0.410432	2.12644
Cmtm4	0.205198	0	32.1101	0.410395	9.71264
Lrp2bp	0.204792	0	0	0.409584	1.89655
Hoga1	0.204704	0	0.917431	0.409408	4.08046
4930451G09Rik	0.204317	0	0	0.408633	2.35632
Tppp3	0.204291	0.218267	55.9633	0.190316	13.7931
Swt1	0.204253	0	17.4312	0.408506	20.4598
Gm5084	0.204208	0.408416	4.58716	0	0
Eva1c	0.204188	0	2.75229	0.408376	4.88506
Ccser1	0.204182	0	11.9266	0.408363	53.046
Nxpe2	0.203939	0	0	0.407877	9.36782
Meg3	0.203777	0.171688	31.1927	0.235866	90.6322
Rhobtb1	0.203745	0.0409917	6.42202	0.366499	8.50575
5430403G16Rik	0.203728	0	0	0.407456	5.74713
Vmn2r48	0.203716	0.407432	1.83486	0	0.0574713
Arhgdib	0.203611	0	0	0.407221	3.50575
9430060I03Rik	0.20353	0	0.917431	0.407059	3.56322
Gm34552	0.203468	0.406935	4.58716	0	0
Sorbs2	0.203387	0	43.1193	0.406773	42.4138
RP23-466P2.3	0.203355	0	0	0.406711	2.35632
Gm38414	0.202995	0.40599	4.58716	0	0
D630036H23Rik	0.202892	0	0	0.405784	0.574713
Jade1	0.202852	0.176728	22.9358	0.228976	4.54023
Esr1	0.202755	0	15.5963	0.40551	11.092
Ophn1	0.202676	0	18.3486	0.405351	34.8276
Gstz1	0.202408	0	15.5963	0.404815	13.6782
Rhbdl3	0.202339	0	10.0917	0.404678	9.65517
D630045J12Rik	0.202269	0	13.7615	0.404538	11.0345
Tubb4b	0.202192	0.201195	55.9633	0.20319	15.2874
Rbms1	0.202185	0.0628988	33.945	0.341471	27.5862
Epb41l5	0.201985	0	9.17431	0.40397	13.6207
Kif3a	0.201978	0.218292	29.3578	0.185663	11.2644
ENSMUSG00000090002	0.201775	0.403551	5.50459	0	0
Cfap36	0.201688	0	20.1835	0.403376	16.1494
Bloc1s6os	0.201684	0	0	0.403369	2.58621
Cnnm1	0.20165	0	1.83486	0.403299	3.85057
Gm4128	0.201613	0	0	0.403226	2.35632
Lrrc17	0.201578	0	7.33945	0.403157	2.29885
Gm42567	0.201377	0	0	0.402754	1.72414
Slc44a3	0.201358	0	5.50459	0.402717	1.49425
Lmo4	0.201285	0	31.1927	0.40257	13.6207
Zfpm2	0.201243	0.0651521	28.4404	0.337334	43.046
Naaa	0.200955	0.00839223	55.9633	0.393518	7.35632
Dnajc15	0.200855	0	11.9266	0.40171	11.092
Tmem218	0.19986	0	15.5963	0.399721	5.28736
Slc37a1	0.199658	0	7.33945	0.399316	2.75862
Pgbd1	0.199555	0	1.83486	0.399111	2.18391
Mks1	0.199525	0	2.75229	0.399051	6.49425
Svil	0.199446	0	3.66972	0.398892	22.7586
Npl	0.199412	0	1.83486	0.398824	3.73563
Plppr4	0.199406	0	28.4404	0.398812	7.18391
Gm11128	0.199359	0	0	0.398717	2.41379
Fam71e1	0.199307	0	2.75229	0.398613	3.21839
4930512B01Rik	0.198859	0	0	0.397718	2.41379
AA536875	0.198632	0.397264	1.83486	0	0
Gm19935	0.198368	0.396736	40.367	0	0
Rgl1	0.19832	0.0542851	36.6972	0.342356	16.7816
Dus2	0.198231	0	1.83486	0.396462	9.42529
Ccdc15	0.197845	0	6.42202	0.395691	7.24138
Pdlim4	0.197828	0	17.4312	0.395655	5.34483
ENSMUSG00000083502	0.197765	0.39553	1.83486	0	0
Cc2d2a	0.197707	0	15.5963	0.395415	12.9885
Ift46	0.197676	0	11.0092	0.395351	8.56322
Tarsl2	0.197645	0	2.75229	0.39529	4.1954
Gm26670	0.197643	0	0	0.395286	1.95402
Fam210b	0.197485	0	10.0917	0.394969	4.08046
Blcap	0.19728	0	12.844	0.39456	11.2644
Cnot10	0.197173	0.210019	27.5229	0.184327	12.931
B230303O12Rik	0.19716	0	0	0.394319	2.01149
Capn10	0.197063	0	3.66972	0.394125	9.1954
Vwc2l	0.19698	0	0.917431	0.39396	5.11494
4932438H23Rik	0.19694	0	6.42202	0.39388	3.96552
Hap1	0.196879	0	21.1009	0.393758	16.0345
RP23-335G1.1	0.196793	0	0	0.393587	1.66667
Ift57	0.196616	0	19.2661	0.393232	6.78161
Krt15	0.19569	0.39138	1.83486	0	0.114943
Dhx40	0.19564	0.0354909	16.5138	0.355789	9.42529
Ap4m1	0.19541	0	0.917431	0.39082	5.57471
Gemin8	0.195389	0	11.9266	0.390778	6.26437
Cfap47	0.195333	0.390665	21.1009	0	0
ENSMUSG00000084915	0.195184	0.390369	6.42202	0	0
Crtc3	0.195131	0	21.1009	0.390263	19.023
Zfp956	0.19504	0	3.66972	0.39008	7.18391
Cxadr	0.19472	0	18.3486	0.389439	4.82759
Tctn2	0.194353	0.388706	33.945	0	0
Plscr2	0.194257	0.2203	13.7615	0.168214	3.10345
Akap9	0.194251	0	22.9358	0.388501	24.5402
Cenpf	0.193963	0	0	0.387927	1.09195
Itpkb	0.193688	0.0690827	37.6147	0.318292	30.5172
Tnfrsf23	0.193566	0	1.83486	0.387132	1.09195
Unc13c	0.193423	0	22.0183	0.386846	31.2069
Pbxip1	0.193341	0	51.3761	0.386683	18.908
Npcd	0.193271	0	0.917431	0.386542	2.12644
Ikzf4	0.193229	0.255889	10.0917	0.130569	2.18391
Chpt1	0.193157	0	63.3028	0.386314	31.8391
Irx5	0.193138	0	4.58716	0.386275	2.75862
Ccdc14	0.193121	0	0.917431	0.386241	1.89655
Nup153	0.193068	0	17.4312	0.386136	10.1724
Plppr3	0.193048	0	3.66972	0.386096	6.49425
Fxyd4	0.192774	0	1.83486	0.385548	2.93103
4930481A15Rik	0.192765	0	9.17431	0.385531	3.85057
Pim2	0.192722	0.00640459	13.7615	0.379039	4.82759
Shtn1	0.19247	0.384941	9.17431	0	3.56322
Pak6	0.192351	0	4.58716	0.384703	2.41379
Arfip1.1	0.192274	0.384549	13.7615	0	0
Morn2	0.19222	0	11.9266	0.38444	3.85057
Ube2e2	0.192163	0.155512	33.0275	0.228814	51.1494
Ankrd26	0.191673	0	5.50459	0.383346	7.64368
Fam60a	0.1915	0	0	0.383	1.55172
L3mbtl4	0.191302	0	1.83486	0.382603	3.10345
Nid2	0.191255	0.237021	10.0917	0.145488	1.43678
Zfp946	0.191089	0	4.58716	0.382178	2.24138
Satb1	0.190735	0	2.75229	0.381469	8.67816
Cct6b	0.190673	0	0	0.381347	1.49425
Sirt3	0.190607	0	5.50459	0.381214	11.7816
Gm17750	0.190398	0	6.42202	0.380797	3.73563
Rhbdd1	0.190116	0	17.4312	0.380231	15.9195
Catsper2	0.190043	0	2.75229	0.380086	5.97701
Wdr25	0.189963	0	0	0.379925	4.5977
Gm15635	0.189835	0	0	0.37967	0.804598
Rad51c	0.189658	0	4.58716	0.379317	2.75862
Rita1	0.189343	0	5.50459	0.378686	4.82759
Fhit	0.189122	0	11.9266	0.378245	39.8851
Tctex1d2	0.189081	0	9.17431	0.378162	4.48276
Kif17	0.188835	0	0	0.377669	2.81609
Myh3	0.188802	0	0	0.377603	6.2069
Gm27188	0.188674	0	0	0.377348	1.95402
Acot1	0.187975	0	14.6789	0.375951	1.89655
Ruvbl1	0.187926	0.193008	16.5138	0.182844	3.27586
P4ha2	0.187493	0	3.66972	0.374987	4.5977
ENSMUSG00000087611	0.18749	0.37498	4.58716	0	0
Gm13710	0.187446	0	0	0.374892	1.32184
Ccdc122	0.187435	0	4.58716	0.37487	5.51724
ENSMUSG00000097062	0.187268	0.374535	4.58716	0	0
Emsy	0.187174	0	20.1835	0.374349	18.5057
Aig1	0.187161	0.0430656	41.2844	0.331257	33.4483
Rec8	0.187126	0	2.75229	0.374252	2.01149
Cluap1	0.187058	0	9.17431	0.374116	6.09195
Npepl1	0.186648	0.373297	17.4312	0	2.01149
4931414P19Rik	0.186599	0	4.58716	0.373198	4.42529
Col5a2	0.186567	0	1.83486	0.373134	6.6092
1700094D03Rik	0.186288	0.372575	66.055	0	0
Tuft1	0.186175	0	6.42202	0.372351	2.41379
Ppp1r13l	0.18606	0	2.75229	0.372121	0.862069
ENSMUSG00000108657	0.18591	0.37182	3.66972	0	0
Gm43603	0.185672	0	0	0.371343	3.27586
Grin2d	0.185651	0	0	0.371302	1.95402
Ccdc87	0.18529	0.37058	4.58716	0	0.0574713
Xpnpep3	0.185287	0	7.33945	0.370574	11.1494
Zfp423	0.184978	0	10.0917	0.369955	15.977
Dync1i1	0.184884	0.369769	14.6789	0	10.1724
Zbtb20	0.184824	0.154373	94.4954	0.215276	91.7241
Macf1	0.184745	0.167448	69.7248	0.202043	72.4713
Npy2r	0.18446	0	1.83486	0.36892	2.24138
Fam111a	0.18436	0	0.917431	0.36872	2.41379
Vangl1	0.184261	0	18.3486	0.368523	10.5747
Kctd15	0.184257	0	6.42202	0.368515	1.89655
Lrwd1	0.183542	0	7.33945	0.367085	3.44828
Bzrap1	0.183086	0	0	0.366172	8.85057
Figf	0.182903	0	0	0.365806	2.35632
N4bp2	0.182896	0	3.66972	0.365791	6.43678
Hacl1	0.182838	0	7.33945	0.365676	8.44828
Gm14230	0.182773	0	0	0.365547	0.229885
Pde1a	0.182402	0	0	0.364803	15.9195
Synj1	0.182187	0.144438	33.945	0.219935	15.3448
Sox5os2	0.182064	0	0	0.364128	3.16092
Sgms2	0.181766	0	11.9266	0.363531	7.01149
Ccbl2	0.181632	0	0	0.363263	6.2069
Ptprk	0.1816	0.0882092	33.945	0.27499	40.9195
Kifap3	0.181594	0	29.3578	0.363189	20.8046
Dhrs3	0.181506	0.148924	13.7615	0.214087	3.16092
Gmip	0.180955	0.361911	6.42202	0	0.91954
Kiz	0.180844	0	20.1835	0.361689	22.7586
Tasp1	0.18078	0	3.66972	0.361561	14.1954
Traf3ip1	0.180742	0	9.17431	0.361484	4.88506
Lclat1	0.180728	0	8.25688	0.361457	8.44828
Tgfbr3	0.180523	0.0245141	30.2752	0.336533	16.4943
Phtf1	0.180459	0	9.17431	0.360917	11.3793
Lhfpl4	0.180449	0	7.33945	0.360899	6.95402
4933434E20Rik	0.180437	0	0	0.360874	17.5862
Sox6	0.180343	0	39.4495	0.360686	54.4828
Mansc4	0.18029	0	0	0.360581	0.689655
Hrasls	0.180267	0	0	0.360534	1.32184
Gsto2	0.179936	0	0.917431	0.359871	2.98851
ENSMUSG00000092441	0.179834	0.359669	3.66972	0	0
Ift43	0.179733	0	13.7615	0.359467	13.5057
Zfp462	0.179316	0	21.1009	0.358632	31.7241
1700055D18Rik	0.179295	0.358589	2.75229	0	0.402299
Kcnq5	0.179278	0	3.66972	0.358556	21.0345
Slc38a6	0.17907	0	5.50459	0.358141	13.3908
Oxr1	0.178995	0	30.2752	0.35799	52.6437
Slc35f3	0.178965	0	2.75229	0.357929	2.24138
Tox2	0.178925	0	3.66972	0.357849	6.2069
Eml2	0.178875	0.232871	24.7706	0.124878	13.3908
Zc3h14	0.178842	0.189001	20.1835	0.168683	8.44828
Sh3bgrl2	0.178783	0	5.50459	0.357566	2.87356
Srek1ip1	0.178686	0.0785577	33.0275	0.278815	7.18391
Iqce	0.178451	0	11.9266	0.356903	8.04598
Luzp1	0.178205	0.0696146	14.6789	0.286795	23.2184
Trp53bp1	0.178017	0	9.17431	0.356033	13.7931
Mbnl3	0.177959	0	0.917431	0.355919	0.632184
Ptges3	0.177858	0.0965565	41.2844	0.259159	13.5632
Btg4	0.177782	0.355564	2.75229	0	0
Trip4	0.177658	0	12.844	0.355317	20.5172
Tcea3	0.177539	0	8.25688	0.355078	2.01149
Cd274	0.177505	0	1.83486	0.35501	1.37931
Neil2	0.177062	0	0.917431	0.354124	1.26437
Usp37	0.176871	0	14.6789	0.353742	17.5862
Ptpru	0.176433	0	4.58716	0.352866	4.65517
Gm3448	0.176276	0	3.66972	0.352552	9.88506
Slc4a8	0.176203	0	14.6789	0.352405	6.72414
Itga10	0.176149	0	2.75229	0.352298	2.98851
Tmem254c	0.175954	0.351908	36.6972	0	0
Lace1	0.17566	0	0	0.351321	14.1379
4933427D14Rik	0.175284	0	4.58716	0.350568	6.26437
C2cd5	0.174959	0.118794	19.2661	0.231125	14.8851
BC025920	0.174845	0	0.917431	0.34969	2.18391
Ifitm3	0.174717	0.178473	24.7706	0.170961	6.32184
Gm13594	0.174647	0	0	0.349295	0.287356
Pir	0.174638	0	5.50459	0.349277	9.25287
Usp2	0.174034	0.0850493	44.0367	0.263018	10
Ryr2	0.173971	0	59.633	0.347942	19.3103
Ccl25	0.173407	0	6.42202	0.346815	8.96552
Vmn2r29	0.173318	0	7.33945	0.346636	1.55172
Bhlhb9	0.172982	0	11.0092	0.345964	10.0575
Gas2l1	0.17286	0	8.25688	0.345719	3.56322
Csrp2	0.172827	0	1.83486	0.345653	3.62069
Kctd16	0.172753	0	0	0.345506	12.931
Junos	0.172743	0	0	0.345485	4.08046
Lpar1	0.172735	0	34.8624	0.34547	17.5862
Pard3b	0.172575	0	21.1009	0.345149	49.2529
Gm20680	0.172428	0	0	0.344855	2.87356
Rccd1	0.172406	0	4.58716	0.344812	5.57471
Togaram2	0.172212	0.344424	21.1009	0	0
Ceacam13	0.172146	0.344292	1.83486	0	0
Cyp4f17	0.17197	0	0	0.34394	3.62069
2700046G09Rik	0.171763	0	5.50459	0.343526	2.47126
ENSMUSG00000057913	0.171759	0.343518	1.83486	0	0
Gm4262	0.1717	0.3434	1.83486	0	0.229885
Cep104	0.171666	0	8.25688	0.343331	5.63218
Igf2bp2	0.17154	0	6.42202	0.343079	2.98851
Thnsl1	0.171353	0	4.58716	0.342707	3.44828
Gm13561	0.171344	0	0	0.342688	0.402299
Gm12454	0.171027	0	0	0.342054	0.287356
Coq3	0.170798	0	8.25688	0.341596	11.0345
Fas	0.170777	0	3.66972	0.341553	3.73563
Cep95	0.170629	0	7.33945	0.341258	12.3563
Rnd3	0.170419	0	4.58716	0.340838	5.45977
Timp2	0.170299	0.287269	57.7982	0.0533285	9.02299
Rreb1	0.170207	0	15.5963	0.340414	26.6667
Mecom	0.170167	0.0466238	7.33945	0.29371	10.7471
Gmnc	0.170104	0	0.917431	0.340208	1.26437
Gm14966	0.169955	0	0	0.339909	8.21839
Pappa2	0.169938	0	0	0.339876	1.72414
Ubp1	0.169239	0.338477	17.4312	0	4.77011
Adamts6	0.169078	0	17.4312	0.338157	16.8966
Zfp185	0.16876	0	11.0092	0.337519	1.09195
E130114P18Rik	0.168743	0	0	0.337487	12.4713
Tmem216	0.168429	0	11.0092	0.336857	8.7931
Unc93a	0.168421	0	0	0.336842	0.172414
Dync2li1	0.168293	0	18.3486	0.336587	3.10345
Recql5	0.168293	0	6.42202	0.336586	9.08046
Fam179b	0.168095	0	0	0.336191	10.6322
Tigd2	0.16806	0	7.33945	0.33612	5.4023
Elmod3	0.167872	0	14.6789	0.335745	4.88506
ENSMUSG00000086291	0.167751	0.335503	1.83486	0	0
Oxct1	0.167733	0.142911	65.1376	0.192554	22.1264
Slc12a8	0.167441	0	3.66972	0.334881	1.66667
Slc22a4	0.1674	0	20.1835	0.334799	9.71264
Impg2	0.167231	0	0.917431	0.334463	2.06897
Gm2694	0.167228	0.334456	1.83486	0	0.632184
Gtf3c5	0.167185	0	6.42202	0.33437	3.56322
Pus7	0.167141	0	6.42202	0.334282	6.49425
Bag2	0.167049	0	6.42202	0.334098	2.58621
Hnrnpll	0.167017	0	21.1009	0.334035	13.1609
Shq1	0.166958	0	9.17431	0.333916	3.96552
ENSMUSG00000082896	0.166904	0.333808	40.367	0	0
Zfp174	0.166865	0	2.75229	0.333729	2.47126
Mdm2	0.166807	0	19.2661	0.333615	12.5862
Bcl9	0.166763	0	13.7615	0.333527	19.3678
Gm26721	0.166705	0	0	0.33341	2.47126
Platr22	0.166654	0	0	0.333309	1.14943
Mycbp	0.166583	0.333165	10.0917	0	5.4023
C030037D09Rik	0.166395	0	0	0.332789	4.25287
Wars2	0.166301	0	3.66972	0.332603	11.4943
Tom1l1	0.16625	0	17.4312	0.3325	12.7586
Gm16365	0.166144	0	0	0.332288	4.5977
Akna	0.165909	0	4.58716	0.331817	1.14943
Plac9a	0.165731	0.331462	11.9266	0	0.0574713
Tnr	0.165407	0.154094	11.0092	0.17672	20.7471
Ttc23	0.165266	0	7.33945	0.330532	12.2989
Upf3b	0.165044	0	8.25688	0.330088	16.0345
Fam189a1	0.165006	0	12.844	0.330012	9.02299
4932435O22Rik	0.164829	0	0.917431	0.329657	0.91954
Armh1	0.164694	0.329389	7.33945	0	0
Stx17	0.164593	0	9.17431	0.329185	6.66667
Smim14	0.164342	0	24.7706	0.328684	5.97701
Mt3	0.164319	0	27.5229	0.328638	31.2644
Vmn2r29.1	0.164304	0.328608	7.33945	0	0
Prr3	0.164214	0	5.50459	0.328428	6.6092
4933404O12Rik	0.164181	0	1.83486	0.328362	1.55172
Acad12	0.164115	0	5.50459	0.32823	7.24138
Six4	0.164086	0	2.75229	0.328172	0.747126
Bclaf1	0.163711	0	29.3578	0.327421	27.7586
ENSMUSG00000102139	0.163697	0.327394	3.66972	0	0
2310030G06Rik	0.163311	0	0	0.326621	0.632184
Gm15614	0.163249	0.326498	4.58716	0	3.90805
Vamp1	0.163207	0	2.75229	0.326414	8.96552
Naf1	0.163084	0	15.5963	0.326167	2.98851
Fgd4	0.163018	0	21.1009	0.326036	20.1724
Platr15	0.162944	0	0	0.325887	0.632184
Mrps6	0.162902	0	14.6789	0.325804	5.22989
Ercc5	0.162498	0	4.58716	0.324995	5.8046
Dnajb6	0.16237	0.153183	50.4587	0.171558	14.3678
ENSMUSG00000112139	0.162263	0.324526	10.0917	0	0
Phex	0.16212	0	5.50459	0.324241	1.6092
Mgat5	0.162064	0.00242933	22.9358	0.321698	19.5977
Rit2	0.161993	0	10.0917	0.323986	20.8046
Ppp1r16a	0.161981	0	8.25688	0.323962	7.01149
Kcnrg	0.161834	0	0	0.323667	17.931
Plcb3	0.161608	0	0.917431	0.323217	2.93103
5430402O13Rik	0.161556	0	1.83486	0.323111	5.17241
Radil	0.161474	0	3.66972	0.322948	4.48276
ENSMUSG00000101797	0.161178	0.322357	14.6789	0	0
Taf1a	0.161156	0	5.50459	0.322313	5.45977
Pcgf2	0.1611	0	8.25688	0.3222	3.50575
Ptpro	0.160974	0	6.42202	0.321948	8.90805
Slc2a13	0.160897	0	7.33945	0.321795	10.8046
Txlnb	0.16055	0	0	0.3211	1.89655
2310040G07Rik	0.160077	0	0	0.320155	5.74713
Hoxb3	0.159941	0	0.917431	0.319882	6.32184
A930033H14Rik	0.159858	0	0.917431	0.319715	1.95402
Samd15	0.159631	0	0	0.319262	1.09195
Arl4a	0.159501	0.129246	16.5138	0.189755	5.28736
Dyrk4	0.159488	0	0	0.318977	0.517241
Zc3h12b	0.159374	0	0.917431	0.318747	19.5402
Gm12796	0.159359	0	0	0.318718	0.344828
Ces1d	0.158614	0.317227	2.75229	0	0
Mid1	0.158503	0	3.66972	0.317005	9.13793
Hsf2	0.158459	0	5.50459	0.316919	8.50575
Dpy19l3	0.158345	0	16.5138	0.316691	3.3908
Pcsk2os1	0.15826	0	1.83486	0.31652	1.6092
Mecomos	0.158234	0	0	0.316468	0.402299
Slc45a4	0.157905	0.160361	20.1835	0.155449	2.75862
Scarb1	0.157842	0	6.42202	0.315683	7.98851
Ccdc62	0.157755	0	12.844	0.31551	9.65517
Dedd2	0.157727	0	3.66972	0.315454	2.70115
Fat1	0.157707	0.0165636	40.367	0.298851	10.6322
Lyrm7	0.157568	0	1.83486	0.315137	2.75862
Ext1	0.157549	0.0499572	26.6055	0.265141	36.6092
Ppcdc	0.157483	0	4.58716	0.314966	8.21839
ENSMUSG00000098024	0.157401	0.314803	5.50459	0	0
Dapp1	0.157255	0	8.25688	0.314511	4.65517
Phox2a	0.157231	0.314462	1.83486	0	0
Airn	0.156933	0	6.42202	0.313866	10.2874
Zfp617	0.156852	0	7.33945	0.313704	3.85057
Ccdc102a	0.156798	0	1.83486	0.313596	0.862069
Alms1	0.156795	0	19.2661	0.31359	16.0345
2900009J06Rik	0.156725	0	0.917431	0.313451	1.83908
4933408B17Rik	0.156711	0	0	0.313421	2.70115
Fmo5	0.156607	0	4.58716	0.313214	3.50575
Letm2	0.156516	0	11.0092	0.313033	15.5172
Med31	0.156349	0	11.9266	0.312697	6.66667
Zfp667	0.156323	0	4.58716	0.312647	2.93103
Frem1	0.15631	0	2.75229	0.31262	6.2069
Eml5	0.15627	0	12.844	0.312541	17.7011
Nedd9	0.156074	0.0799509	12.844	0.232196	8.7931
Zfp827	0.156062	0	11.9266	0.312124	11.3793
Gm15441	0.156061	0	0	0.312122	0.689655
ENSMUSG00000113003	0.155936	0.311871	4.58716	0	0
Zhx2	0.155776	0	16.5138	0.311552	13.908
B4galt5	0.155774	0	7.33945	0.311549	7.47126
Tgif1	0.155499	0	6.42202	0.310998	1.49425
Odf2	0.155306	0	24.7706	0.310611	21.2069
Gna14	0.155108	0.310216	1.83486	0	0.344828
Egln3	0.155085	0	1.83486	0.31017	1.55172
Yap1	0.154982	0	16.5138	0.309964	7.52874
Tmem220	0.154974	0	4.58716	0.309948	1.6092
Cybrd1	0.154608	0	3.66972	0.309215	1.6092
Meis2	0.154444	0.0351148	43.1193	0.273772	36.5517
Sdk2	0.154373	0	6.42202	0.308746	9.08046
Tbc1d19	0.154363	0	18.3486	0.308726	11.8391
Gbas	0.154183	0	0	0.308366	16.8391
Ednra	0.154013	0	6.42202	0.308026	4.02299
Atxn7l1	0.153812	0	11.9266	0.307625	14.2529
Cpne2	0.153761	0	12.844	0.307523	7.58621
2410089E03Rik	0.153431	0	0	0.306863	22.4138
Tpk1	0.153256	0	9.17431	0.306513	12.3563
Rgl2	0.153228	0	11.9266	0.306456	13.6207
Tusc3	0.152987	0	41.2844	0.305973	18.908
Sorbs1	0.152889	0	46.789	0.305779	37.3563
Zfp36l1	0.152857	0	46.789	0.305714	14.7701
Gm43936	0.152849	0	0	0.305699	0.747126
Gm15723	0.152804	0	0	0.305608	0.689655
Fam184a	0.152759	0.0405268	21.1009	0.26499	17.9885
Mroh5	0.1526	0	0	0.3052	1.6092
Lsm14b	0.152554	0	11.0092	0.305107	3.56322
Smpdl3b	0.152492	0	1.83486	0.304984	2.29885
Btbd11	0.15245	0	6.42202	0.3049	8.21839
Med25	0.15187	0	17.4312	0.30374	8.96552
Myof	0.151827	0	1.83486	0.303654	2.18391
Sestd1	0.151731	0.219005	10.0917	0.0844576	3.44828
BC005624	0.151665	0	22.0183	0.303331	8.96552
Msrb3	0.151646	0.0218436	6.42202	0.281448	7.29885
Wnk2	0.151619	0	14.6789	0.303238	15.3448
Camk1d	0.1515	0.302999	12.844	0	9.02299
Tmem254b	0.151497	0.302995	44.9541	0	0
Eef2kmt	0.151083	0	5.50459	0.302165	2.64368
Cys1	0.150981	0.301963	37.6147	0	0.91954
Nr2f1	0.150846	0	50.4587	0.301692	12.2989
Atr	0.150676	0	15.5963	0.301351	12.7011
Dock8	0.150629	0	16.5138	0.301259	7.87356
Klhl13	0.150597	0.162339	19.2661	0.138856	8.3908
Syde2	0.150554	0	2.75229	0.301107	2.12644
Cnn3	0.150426	0.0318021	63.3028	0.269051	13.5632
Ddx20	0.150413	0	6.42202	0.300826	3.85057
Clstn2	0.150393	0	4.58716	0.300786	12.6437
Susd2	0.15034	0.300681	6.42202	0	1.78161
Duxbl1	0.150266	0	0.917431	0.300532	1.89655
Lrrc2	0.150255	0	14.6789	0.30051	2.52874
Ddx26b	0.150114	0	0	0.300228	16.954
4930533K18Rik	0.149736	0	0	0.299472	0.632184
Plp2	0.149605	0	3.66972	0.29921	0.747126
Rhpn2	0.149593	0	5.50459	0.299186	5.57471
Als2cr12	0.149574	0	0	0.299148	5.4023
Ankrd54	0.149426	0	3.66972	0.298852	3.44828
1110051M20Rik	0.149254	0	33.945	0.298509	31.8391
Rnf180	0.149195	0	11.9266	0.29839	8.44828
Ano6	0.149177	0	16.5138	0.298354	18.8506
Ccdc134	0.148965	0	3.66972	0.297929	3.56322
RP24-136L4.5	0.148941	0	0	0.297882	0.632184
Syt9	0.148921	0	6.42202	0.297843	4.25287
Nek4	0.148795	0	6.42202	0.29759	3.44828
Gm26555	0.148687	0	0	0.297374	1.26437
Coro2b	0.148626	0	22.9358	0.297252	11.3218
Adarb1	0.148524	0	5.50459	0.297048	6.43678
Mettl24	0.148515	0	7.33945	0.297029	8.04598
Mindy4	0.148263	0.296527	5.50459	0	0
Kdm7a	0.148194	0	17.4312	0.296388	13.1034
ENSMUSG00000081670	0.148115	0.296229	8.25688	0	0
5031425E22Rik	0.147956	0	14.6789	0.295912	22.069
Pitpnm1	0.147903	0	11.9266	0.295806	6.03448
Foxp4	0.147731	0	3.66972	0.295463	6.09195
Fhitos	0.147629	0	0	0.295258	1.14943
Trmt1l	0.147556	0	16.5138	0.295112	17.8736
Gm26615	0.147447	0	0	0.294894	1.09195
Spata13	0.147273	0	13.7615	0.294546	9.94253
Gm20186	0.147104	0	0	0.294209	2.06897
Dsc2	0.147102	0	1.83486	0.294204	1.2069
Rmst	0.146759	0	38.5321	0.293518	46.5517
Gm15892	0.146588	0	0	0.293175	3.96552
Slc35a2	0.146401	0	16.5138	0.292802	7.52874
Cacfd1	0.146164	0	14.6789	0.292328	5.17241
Mgat4b	0.146154	0	14.6789	0.292308	4.94253
Gm29536	0.146132	0	3.66972	0.292264	6.03448
Naa40	0.14603	0	12.844	0.292061	12.7586
Prune2	0.145978	0	36.6972	0.291955	29.4828
Slc22a14	0.145702	0	0.917431	0.291405	5.86207
Ptpn13	0.145699	0	16.5138	0.291398	16.0345
4930519F16Rik	0.145353	0.290706	14.6789	0	0
Upp2	0.145278	0	14.6789	0.290557	23.8506
Pdyn	0.145152	0	1.83486	0.290304	1.6092
Rev3l	0.144317	0	19.2661	0.288633	30.4598
Rgcc	0.144315	0.0791995	16.5138	0.20943	9.48276
Ramp1	0.144145	0.137281	47.7064	0.151009	12.7011
Crem	0.144028	0	4.58716	0.288055	9.88506
Sppl2b	0.143993	0	4.58716	0.287985	7.98851
Tstd1	0.143596	0	0	0.287193	1.14943
Gm15489	0.143563	0	0	0.287127	4.94253
1700120C14Rik	0.143553	0.287106	5.50459	0	0
Tent5a	0.143516	0.287031	8.25688	0	0
Phxr4	0.143465	0	9.17431	0.286931	9.82759
A930007I19Rik	0.143367	0	0.917431	0.286734	2.52874
Ndc1	0.143167	0	10.0917	0.286335	3.33333
Phkg1	0.14264	0	10.0917	0.285281	36.2069
Wdr92	0.142414	0	6.42202	0.284827	3.27586
Pzp	0.142344	0	1.83486	0.284689	4.5977
Atp1a1	0.142335	0.00220848	94.4954	0.282461	24.2529
Tead3	0.142221	0	2.75229	0.284441	1.72414
Vti1a	0.142031	0	22.9358	0.284063	33.9655
Crim1	0.14197	0	24.7706	0.28394	20.5747
Rasa2	0.141902	0.0998914	34.8624	0.183913	16.8966
Fnip2	0.141832	0.283664	13.7615	0	4.77011
Tchp	0.141729	0	5.50459	0.283458	2.64368
Arhgef4	0.141428	0	38.5321	0.282855	27.1839
ENSMUSG00000097792	0.141277	0.282554	8.25688	0	0
Qtrtd1	0.141138	0	0	0.282277	3.62069
Stk11ip	0.141126	0	4.58716	0.282252	2.12644
Nfatc1	0.141048	0	8.25688	0.282096	3.3908
1810022K09Rik	0.140948	0	0	0.281896	14.8276
Tbc1d30	0.140656	0	4.58716	0.281312	2.47126
Dbpht2	0.140636	0	0	0.281272	1.32184
Dnmbp	0.140612	0	10.0917	0.281225	6.78161
Arhgdig	0.140458	0.280916	10.0917	0	6.03448
Crip1	0.140266	0.280532	16.5138	0	2.18391
Six5	0.140119	0	3.66972	0.280238	1.78161
Scrn2	0.140021	0	5.50459	0.280042	1.49425
Gm42477	0.139816	0	0	0.279631	6.26437
Dhx34	0.139624	0	0.917431	0.279249	1.72414
A430033K04Rik	0.139513	0	1.83486	0.279027	4.25287
Dchs1	0.139511	0	25.6881	0.279021	3.85057
Nlrc5	0.139276	0	1.83486	0.278552	1.26437
Pofut2	0.139248	0.157074	22.9358	0.121421	2.81609
Ttc5	0.139166	0	2.75229	0.278333	7.81609
Slc7a7	0.139157	0	4.58716	0.278313	2.75862
Arhgap44	0.139074	0	7.33945	0.278148	7.01149
Ring1	0.138876	0	12.844	0.277752	14.5402
Zkscan16	0.138796	0	2.75229	0.277591	3.10345
Efcc1	0.138704	0	3.66972	0.277408	2.41379
Ctnna1	0.138631	0.0293728	33.945	0.24789	17.8736
Gm5535	0.138515	0.27703	5.50459	0	0
Ston2	0.138339	0	11.9266	0.276679	18.6782
Gm10848	0.138199	0	0	0.276398	1.66667
Vim	0.137983	0.0472615	77.9817	0.228704	5.97701
Ptk7	0.137791	0	6.42202	0.275581	5.22989
Igfbp2	0.137769	0.275538	19.2661	0	1.83908
Smad5	0.137666	0	16.5138	0.275332	4.94253
Naga	0.137657	0	10.0917	0.275314	3.56322
Txnip	0.137626	0.110292	46.789	0.16496	3.44828
Uhrf1bp1l	0.137519	0	21.1009	0.275038	9.88506
Evi5	0.137467	0	27.5229	0.274933	18.1609
Ino80b	0.137096	0	3.66972	0.274191	6.2069
Khk	0.136966	0	8.25688	0.273932	2.41379
Iqcb1	0.13676	0	7.33945	0.273521	13.5632
Hacd1	0.136656	0	3.66972	0.273312	7.93103
Slc20a1	0.136621	0	20.1835	0.273243	11.3793
Map9	0.13656	0	6.42202	0.27312	4.5977
Ocln	0.136251	0.0397758	20.1835	0.232727	5.17241
Gm26582	0.136183	0	0	0.272366	4.25287
Syne2	0.136059	0.0366187	7.33945	0.2355	6.32184
4930522L14Rik	0.136031	0	0	0.272063	6.72414
Gm28539	0.13561	0	0	0.271219	5.86207
Cenpv	0.135458	0	12.844	0.270917	7.12644
Immp2l	0.135295	0	4.58716	0.270591	22.7011
Unc79	0.135284	0	10.0917	0.270568	14.4828
Dcp1b	0.135127	0	1.83486	0.270253	8.67816
Ssh2	0.135112	0.270225	72.4771	0	20.4598
Agpat9	0.135065	0	0	0.270129	2.24138
[truncated: 1,911 more rows]

## Sheet: Microglia
gene	combined_expr_specificity	cellex_score_zhang	expr_proportion_zhang	cellex_score_ludwig	expr_proportion_ludwig
Spi1	0.977637	-	-	0.977637	18.3206
Mir142hg	0.967283	-	-	0.967283	25.1908
P2ry6	0.964272	-	-	0.964272	15.0127
Havcr2	0.962771	-	-	0.962771	6.61578
Vav1	0.961882	-	-	0.961882	8.6514
Abi3	0.960698	-	-	0.960698	18.8295
Cd33	0.960635	-	-	0.960635	7.12468
Upk1b	0.960115	-	-	0.960115	4.83461
Cryba4	0.957915	-	-	0.957915	1.01781
Csf2rb	0.955201	-	-	0.955201	1.52672
Cd48	0.954733	-	-	0.954733	6.36132
Rhoh	0.950211	-	-	0.950211	15.0127
Tlr7	0.950129	-	-	0.950129	4.3257
Cd86	0.948906	-	-	0.948906	11.4504
Il1a	0.947853	-	-	0.947853	2.79898
Slamf8	0.946772	-	-	0.946772	1.52672
Hk3	0.946696	-	-	0.946696	7.63359
Hck	0.945298	-	-	0.945298	16.7939
Ncf4	0.945059	-	-	0.945059	1.52672
Snx20	0.941817	-	-	0.941817	4.3257
Lilra5	0.941557	-	-	0.941557	1.01781
AF251705	0.940468	-	-	0.940468	6.87023
Siglech	0.939814	-	-	0.939814	29.5165
Gm42601	0.937784	-	-	0.937784	2.03562
Lcp2	0.933667	-	-	0.933667	9.41476
Fgd2	0.933315	-	-	0.933315	27.4809
Pilra	0.933222	-	-	0.933222	1.27226
Gpsm3	0.927129	-	-	0.927129	0.508906
Hmha1	0.926381	-	-	0.926381	57.2519
Cd180	0.924399	-	-	0.924399	19.084
Nckap1l	0.922752	-	-	0.922752	16.5394
Ikzf1	0.921598	-	-	0.921598	34.8601
6030468B19Rik	0.921548	-	-	0.921548	2.03562
Il21r	0.921028	-	-	0.921028	5.59796
Gm3264	0.919924	-	-	0.919924	3.56234
C3ar1	0.918891	-	-	0.918891	3.56234
1810011H11Rik	0.916926	-	-	0.916926	5.59796
Myo1g	0.916647	-	-	0.916647	2.03562
Ptpn6	0.916395	-	-	0.916395	5.34351
Bin2	0.913767	-	-	0.913767	14.2494
Tlr1	0.913734	-	-	0.913734	0.763359
Gm13814	0.912844	-	-	0.912844	1.01781
Il7r	0.912234	-	-	0.912234	3.05344
Neurl3	0.911518	-	-	0.911518	3.05344
Gm26714	0.911329	-	-	0.911329	1.78117
Blnk	0.909869	-	-	0.909869	19.8473
Tmem119	0.909551	-	-	0.909551	12.4682
Dennd1c	0.909345	-	-	0.909345	4.3257
Ly86	0.908169	-	-	0.908169	53.6896
Gm29291	0.907529	-	-	0.907529	0.763359
Cd84	0.907193	-	-	0.907193	20.6107
Susd3	0.907009	-	-	0.907009	8.90585
Csf3r	0.906765	-	-	0.906765	20.8651
Il1rl1	0.905291	-	-	0.905291	1.01781
Gm28286	0.904657	-	-	0.904657	2.03562
Was	0.903454	-	-	0.903454	1.78117
Selplg	0.903216	-	-	0.903216	46.3104
Gm15232	0.902859	-	-	0.902859	0.763359
Gpr84	0.902099	-	-	0.902099	1.01781
Sash3	0.901935	-	-	0.901935	1.78117
Ccr1	0.900566	-	-	0.900566	1.52672
Ptprc	0.900161	-	-	0.900161	19.5929
Runx1	0.900137	-	-	0.900137	35.369
Pik3cg	0.899152	-	-	0.899152	4.3257
Ncf1	0.899094	-	-	0.899094	7.37913
Pik3ap1	0.897481	-	-	0.897481	17.0483
Ccr5	0.897283	-	-	0.897283	18.5751
Gm42747	0.896627	-	-	0.896627	1.27226
I830077J02Rik	0.895326	-	-	0.895326	3.30789
Tlr13	0.893657	-	-	0.893657	3.05344
Nlrp1b	0.893596	-	-	0.893596	10.687
Pld4	0.893491	-	-	0.893491	10.4326
Igsf6	0.8918	-	-	0.8918	2.29008
Inpp5d	0.890841	-	-	0.890841	62.0865
Pilrb2	0.889772	-	-	0.889772	0.508906
Cyth4	0.889594	-	-	0.889594	19.084
Gpr183	0.888517	-	-	0.888517	11.7048
Csf1r	0.888081	-	-	0.888081	37.9135
Nlrp3	0.887647	-	-	0.887647	2.03562
Crybb1	0.886709	-	-	0.886709	3.05344
Glrp1	0.88631	-	-	0.88631	1.78117
Dock2	0.883361	-	-	0.883361	33.8422
Gna15	0.879445	-	-	0.879445	14.5038
Clec4a2	0.879214	-	-	0.879214	2.03562
Capn3	0.87784	-	-	0.87784	19.084
Arhgap30	0.877776	-	-	0.877776	9.66921
AC168977.1	0.877697	-	-	0.877697	0.254453
Naip2	0.876743	-	-	0.876743	4.58015
C5ar2	0.87576	-	-	0.87576	1.52672
8030474K03Rik	0.874883	-	-	0.874883	0.254453
Gm29395	0.874883	-	-	0.874883	0.254453
Slc15a3	0.874819	-	-	0.874819	2.79898
Cmklr1	0.873507	-	-	0.873507	10.1781
Jmjd7	0.872965	-	-	0.872965	0.254453
Spns3	0.872379	-	-	0.872379	2.03562
Gm10309	0.871391	-	-	0.871391	0.254453
Syk	0.870781	-	-	0.870781	9.92366
Ms4a4a	0.868155	-	-	0.868155	0.254453
Slc2a5	0.867611	-	-	0.867611	7.88804
Cd300a	0.866607	-	-	0.866607	4.83461
Alox5	0.866531	-	-	0.866531	4.83461
Asgr2	0.86626	-	-	0.86626	0.254453
Gm28192	0.865624	-	-	0.865624	0.254453
Naip6	0.86538	-	-	0.86538	2.03562
Fcrls	0.865305	-	-	0.865305	9.41476
Hspb3	0.863653	-	-	0.863653	1.27226
Myo1f	0.863423	-	-	0.863423	34.6056
Lrrc25	0.863341	-	-	0.863341	1.01781
Ccl4	0.862464	-	-	0.862464	0.763359
Clec4d	0.862407	-	-	0.862407	0.254453
Clec4a3	0.862328	-	-	0.862328	1.78117
Plcb2	0.862131	-	-	0.862131	2.54453
Gm36831	0.860768	-	-	0.860768	0.254453
A630001G21Rik	0.86017	-	-	0.86017	6.87023
Fcgr2b	0.859337	-	-	0.859337	4.58015
Ctss	0.858581	-	-	0.858581	52.9262
8030442B05Rik	0.857711	-	-	0.857711	26.2087
Fam105a	0.857445	-	-	0.857445	41.2214
Ccr3	0.857261	-	-	0.857261	0.254453
Hpgds	0.857218	-	-	0.857218	27.4809
Rasal3	0.85656	-	-	0.85656	4.58015
C1qc	0.855954	-	-	0.855954	39.6947
Tg	0.854235	-	-	0.854235	2.54453
Plcg2	0.851915	-	-	0.851915	16.5394
Gm33994	0.849831	-	-	0.849831	0.254453
Gpr34	0.848967	-	-	0.848967	16.285
P2ry12	0.848858	-	-	0.848858	46.056
Gm26740	0.848476	-	-	0.848476	24.4275
P2ry13	0.844767	-	-	0.844767	4.07125
Siglece	0.843434	-	-	0.843434	1.52672
Ms4a7	0.843288	-	-	0.843288	0.763359
Lyzl4	0.841784	-	-	0.841784	3.30789
Naip5	0.841343	-	-	0.841343	3.30789
Cd200r1	0.839623	-	-	0.839623	1.78117
Fcgr1	0.838093	-	-	0.838093	3.81679
Ms4a6b	0.837722	-	-	0.837722	1.52672
Rac2	0.837283	-	-	0.837283	1.27226
Il10ra	0.835598	-	-	0.835598	4.58015
Ccr6	0.834923	-	-	0.834923	0.508906
Gm3488	0.83463	-	-	0.83463	5.34351
Csf2rb2	0.833497	-	-	0.833497	1.01781
Ptk2b	0.831874	-	-	0.831874	9.16031
Hpgd	0.831715	-	-	0.831715	13.486
Gm13479	0.831186	-	-	0.831186	1.52672
Apbb1ip	0.831165	-	-	0.831165	42.4936
Tbxas1	0.830128	-	-	0.830128	27.2265
Cd37	0.829728	-	-	0.829728	4.07125
Psd4	0.828292	-	-	0.828292	2.03562
Siglecf	0.827701	-	-	0.827701	0.763359
Rtn4rl1	0.826913	-	-	0.826913	15.0127
Cd53	0.826401	-	-	0.826401	6.61578
Arhgap25	0.826091	-	-	0.826091	10.687
Tnfrsf17	0.825791	-	-	0.825791	0.508906
F13a1	0.823649	-	-	0.823649	5.08906
Ms4a6c	0.823051	-	-	0.823051	1.78117
Gm15523	0.822942	-	-	0.822942	0.763359
Gm26520	0.821437	-	-	0.821437	5.08906
Irf5	0.82108	-	-	0.82108	5.85242
Ccdc88b	0.818583	-	-	0.818583	4.83461
Themis2	0.817553	-	-	0.817553	5.08906
C1qa	0.816875	-	-	0.816875	32.0611
Fermt3	0.814813	-	-	0.814813	18.5751
Laptm5	0.814537	-	-	0.814537	13.9949
Lpar5	0.811446	-	-	0.811446	0.763359
Cx3cr1	0.811359	-	-	0.811359	47.3282
Gmfg	0.810173	-	-	0.810173	2.54453
Nfam1	0.809809	-	-	0.809809	3.56234
Nlrp1a	0.80814	-	-	0.80814	1.78117
Abcc3	0.807931	-	-	0.807931	8.90585
Arhgap22	0.807203	-	-	0.807203	20.1018
Stab1	0.805849	-	-	0.805849	16.285
Gm42962	0.805489	-	-	0.805489	1.27226
Bcl2a1a	0.805081	-	-	0.805081	0.763359
Tnfrsf11a	0.803266	-	-	0.803266	12.9771
Lst1	0.803025	-	-	0.803025	6.87023
Sla	0.802375	-	-	0.802375	4.3257
Gm11851	0.801635	-	-	0.801635	1.01781
Lpxn	0.801089	-	-	0.801089	5.85242
Gm14170	0.800104	-	-	0.800104	0.254453
Epsti1	0.799256	-	-	0.799256	12.9771
Fyb	0.798638	-	-	0.798638	51.145
Gm43878	0.797947	-	-	0.797947	1.78117
Gm15758	0.797141	-	-	0.797141	0.254453
Adap2	0.796485	-	-	0.796485	32.0611
Gm17133	0.79552	-	-	0.79552	0.254453
Dock8	0.795391	-	-	0.795391	46.8193
Spint1	0.793921	-	-	0.793921	1.52672
Itgb2	0.793297	-	-	0.793297	1.78117
A830008E24Rik	0.791838	-	-	0.791838	17.5573
Adap2os	0.791318	-	-	0.791318	25.4453
Irf4	0.791102	-	-	0.791102	0.508906
Gm43464	0.789269	-	-	0.789269	0.763359
Ube4bos3	0.789269	-	-	0.789269	0.254453
Tnfsf8	0.787224	-	-	0.787224	2.79898
Elf4	0.78614	-	-	0.78614	8.6514
Mpeg1	0.785443	-	-	0.785443	2.54453
Cd19	0.7846	-	-	0.7846	0.254453
Gm26522	0.783857	-	-	0.783857	10.4326
Cdh23	0.781509	-	-	0.781509	41.2214
Itgam.1	0.780693	-	-	0.780693	0.508906
Traf3ip3	0.780075	-	-	0.780075	3.56234
Krt40	0.777906	-	-	0.777906	1.01781
Gm12708	0.777311	-	-	0.777311	0.508906
F9	0.774076	-	-	0.774076	0.508906
Ltc4s	0.773198	-	-	0.773198	8.90585
Ptgs1	0.772994	-	-	0.772994	9.41476
Trem2	0.772796	-	-	0.772796	11.1959
Pde3b	0.771091	-	-	0.771091	31.2977
Hk2	0.769398	-	-	0.769398	16.285
Siglecg	0.769275	-	-	0.769275	0.508906
Slc11a1	0.769149	-	-	0.769149	8.90585
Lilrb4a	0.768105	-	-	0.768105	0.763359
Abcg3	0.767024	-	-	0.767024	3.81679
RP23-32A8.6	0.766118	-	-	0.766118	2.54453
Cd14	0.764156	-	-	0.764156	3.30789
Ms4a13	0.763725	-	-	0.763725	0.254453
Cmtm7	0.763476	-	-	0.763476	12.4682
Tgfbr1	0.763322	-	-	0.763322	56.743
Tnfrsf13b	0.763319	-	-	0.763319	1.27226
Pik3r5	0.762386	-	-	0.762386	6.10687
Msr1	0.760379	-	-	0.760379	0.763359
Ms4a6d	0.760165	-	-	0.760165	1.27226
Parvg	0.758879	-	-	0.758879	1.01781
Il1rl2	0.758166	-	-	0.758166	4.07125
Klhl6	0.757883	-	-	0.757883	6.36132
Lcp1	0.757311	-	-	0.757311	17.8117
Tyrobp	0.757092	-	-	0.757092	8.14249
BC035044	0.755578	-	-	0.755578	3.56234
Pou2f2	0.755491	-	-	0.755491	22.3919
Fcer1g	0.755191	-	-	0.755191	10.9415
Hexb	0.755073	-	-	0.755073	58.0153
Bach2os	0.75499	-	-	0.75499	3.05344
Ccr7	0.754643	-	-	0.754643	0.254453
Gm9949	0.753619	-	-	0.753619	0.254453
Tnfaip8l2	0.753464	-	-	0.753464	1.52672
Phf11b	0.752397	-	-	0.752397	0.763359
Ipcef1	0.751774	-	-	0.751774	8.14249
Rgs1	0.751749	-	-	0.751749	0.254453
Cd68	0.751196	-	-	0.751196	4.58015
Wdfy4	0.75067	-	-	0.75067	9.16031
Gm5431	0.749354	-	-	0.749354	0.508906
Pik3cd	0.74886	-	-	0.74886	14.2494
Kcnk6	0.747794	-	-	0.747794	3.05344
Pirb	0.747449	-	-	0.747449	2.29008
Gm9573	0.746926	-	-	0.746926	1.01781
Asb2	0.746647	-	-	0.746647	4.3257
Slamf6	0.745318	-	-	0.745318	3.81679
Cd79b	0.744582	-	-	0.744582	0.508906
Mlph	0.743692	-	-	0.743692	3.81679
C1qb	0.742551	-	-	0.742551	20.8651
Ptpn18	0.742426	-	-	0.742426	8.14249
Ebf3	0.741224	-	-	0.741224	5.34351
Treml2	0.739044	-	-	0.739044	0.508906
Lair1	0.739006	-	-	0.739006	29.771
Unc93b1	0.738771	-	-	0.738771	22.1374
Gm26690	0.73827	-	-	0.73827	1.78117
Plcl2	0.736942	-	-	0.736942	31.8066
Ptafr	0.736463	-	-	0.736463	1.52672
Slco2b1	0.736047	-	-	0.736047	32.57
Rgs10	0.73589	-	-	0.73589	25.4453
Frrs1	0.730522	-	-	0.730522	9.41476
Ncf2	0.72979	-	-	0.72979	9.41476
4933406I18Rik	0.729707	-	-	0.729707	38.4224
Klrd1	0.729347	-	-	0.729347	0.254453
Adgre1	0.728056	-	-	0.728056	7.12468
Olfr741	0.727796	-	-	0.727796	0.254453
Clec5a	0.726476	-	-	0.726476	0.508906
Gm3716	0.726366	-	-	0.726366	0.508906
Tnfrsf1b	0.726278	-	-	0.726278	5.59796
AU020206	0.724509	-	-	0.724509	14.7583
Gm10851	0.724274	-	-	0.724274	5.85242
5031414D18Rik	0.724216	-	-	0.724216	2.79898
Ctse	0.723846	-	-	0.723846	1.01781
Clec2i	0.721888	-	-	0.721888	0.254453
Slc37a2	0.721747	-	-	0.721747	3.05344
Gm26656	0.720494	-	-	0.720494	0.508906
Gm15731	0.719917	-	-	0.719917	0.508906
Slamf7	0.718731	-	-	0.718731	0.254453
Nrros	0.717775	-	-	0.717775	11.7048
Gm11998	0.717586	-	-	0.717586	0.508906
Gmip	0.717582	-	-	0.717582	11.1959
Lyl1	0.716826	-	-	0.716826	2.54453
Abca9	0.716245	-	-	0.716245	18.5751
Slfn8	0.715885	-	-	0.715885	2.03562
Arhgap15	0.714445	-	-	0.714445	26.2087
Klk8	0.713906	-	-	0.713906	1.52672
0610040J01Rik	0.713319	-	-	0.713319	22.6463
Zfp710	0.712409	-	-	0.712409	34.3511
AA792892	0.712084	-	-	0.712084	0.254453
Atp8a2	0.711845	-	-	0.711845	30.5344
RP23-49I18.5	0.71152	-	-	0.71152	3.56234
P3h2	0.709724	-	-	0.709724	26.972
Samsn1	0.709562	-	-	0.709562	7.37913
Soat2	0.707597	-	-	0.707597	0.763359
Gm26783	0.707064	-	-	0.707064	0.763359
Gm13247	0.705136	-	-	0.705136	6.10687
A630033H20Rik	0.704362	-	-	0.704362	1.52672
Tspan18	0.7036	-	-	0.7036	9.16031
Rbm47	0.703165	-	-	0.703165	20.8651
Gm27201	0.703131	-	-	0.703131	1.52672
H2-DMb1	0.702877	-	-	0.702877	2.79898
4930539M17Rik	0.702613	-	-	0.702613	0.508906
Gpr160	0.701748	-	-	0.701748	4.58015
Gm37306	0.700024	-	-	0.700024	0.763359
1700001C19Rik	0.699252	-	-	0.699252	1.27226
Cd163	0.698534	-	-	0.698534	1.01781
Gm26510	0.698497	-	-	0.698497	9.66921
Gm43741	0.69848	-	-	0.69848	0.763359
Ctsc	0.698448	-	-	0.698448	17.3028
Siglec1	0.698425	-	-	0.698425	0.763359
Gm13097	0.698054	-	-	0.698054	0.254453
Btk	0.697418	-	-	0.697418	9.41476
Mef2c	0.696445	-	-	0.696445	47.3282
F630028O10Rik	0.695077	-	-	0.695077	0.254453
Arhgap9	0.694283	-	-	0.694283	1.01781
Gpr65	0.692918	-	-	0.692918	0.254453
Tnfsf13b	0.692331	-	-	0.692331	5.08906
Gm4955	0.692139	-	-	0.692139	0.254453
Bco2	0.690874	-	-	0.690874	2.29008
Tifab	0.690412	-	-	0.690412	1.01781
Rps6ka1	0.689758	-	-	0.689758	13.2316
Gm15356	0.689453	-	-	0.689453	0.254453
Cd22	0.688947	-	-	0.688947	0.508906
Plek	0.688604	-	-	0.688604	9.16031
Lyz2	0.687059	-	-	0.687059	3.56234
Lyn	0.685864	-	-	0.685864	50.8906
Gm2245	0.685598	-	-	0.685598	1.78117
Alox5ap	0.68522	-	-	0.68522	2.03562
Gm13802	0.683893	-	-	0.683893	1.01781
Tgfb1	0.682331	-	-	0.682331	8.39695
Slc7a7	0.680595	-	-	0.680595	8.90585
Dapp1	0.680177	-	-	0.680177	13.2316
Golm1	0.68002	-	-	0.68002	6.36132
Platr29	0.678263	-	-	0.678263	0.508906
Mb21d1	0.677056	-	-	0.677056	1.78117
Fcgr3	0.676741	-	-	0.676741	4.58015
Cnr2	0.673137	-	-	0.673137	1.27226
Gm15635	0.672232	-	-	0.672232	1.27226
Ntpcr	0.672092	-	-	0.672092	7.37913
RP23-81F19.2	0.671677	-	-	0.671677	0.763359
Entpd1	0.671677	-	-	0.671677	24.4275
Aif1	0.670321	-	-	0.670321	3.30789
Itgax	0.667754	-	-	0.667754	1.01781
Fam46c	0.666692	-	-	0.666692	2.29008
Tmem150b	0.66606	-	-	0.66606	1.01781
Zfp69	0.666036	-	-	0.666036	6.61578
Bank1	0.665469	-	-	0.665469	8.6514
Clec10a	0.664566	-	-	0.664566	0.508906
2010013B24Rik	0.664384	-	-	0.664384	2.54453
Pcp2	0.661848	-	-	0.661848	0.508906
Fam102b	0.65873	-	-	0.65873	12.2137
Haao	0.657621	-	-	0.657621	1.01781
5430427O19Rik	0.657179	-	-	0.657179	1.78117
Cd244	0.652219	-	-	0.652219	0.763359
H2-DMa	0.651964	-	-	0.651964	3.81679
Lat2	0.651607	-	-	0.651607	3.56234
RP23-152P5.3	0.650646	-	-	0.650646	1.27226
Fli1	0.649135	-	-	0.649135	36.3868
Il22	0.648737	-	-	0.648737	0.254453
Six3	0.648397	-	-	0.648397	0.254453
Vsir	0.648074	-	-	0.648074	13.2316
Ticam2	0.647284	-	-	0.647284	0.254453
Gm19708	0.646979	-	-	0.646979	0.254453
Slc5a10	0.643499	-	-	0.643499	0.508906
Gm10945	0.643459	-	-	0.643459	0.254453
Pag1	0.6421	-	-	0.6421	40.7125
F11r	0.641786	-	-	0.641786	14.2494
Gm5134	0.641181	-	-	0.641181	1.78117
Gm3173	0.641056	-	-	0.641056	1.52672
Olfr1426	0.641053	-	-	0.641053	0.254453
F730035P03Rik	0.640079	-	-	0.640079	0.254453
Ccl9	0.638688	-	-	0.638688	0.508906
Gm15444	0.638396	-	-	0.638396	0.254453
Cd209f	0.638007	-	-	0.638007	0.508906
Enam	0.637299	-	-	0.637299	0.254453
Vmn2r26	0.637157	-	-	0.637157	0.254453
Plekho1	0.63713	-	-	0.63713	10.687
Mlxipl	0.635217	-	-	0.635217	8.39695
Tns4	0.635158	-	-	0.635158	0.763359
Gm10384	0.63511	-	-	0.63511	0.254453
Orai2	0.634534	-	-	0.634534	7.63359
Gm16578	0.634194	-	-	0.634194	0.254453
Lpcat2	0.633905	-	-	0.633905	27.2265
Maf	0.633466	-	-	0.633466	25.9542
St14	0.633259	-	-	0.633259	0.763359
Gm2237	0.632808	-	-	0.632808	1.52672
Gm5591	0.632595	-	-	0.632595	0.254453
Arl11	0.632269	-	-	0.632269	0.254453
Fes	0.631625	-	-	0.631625	3.56234
Lacc1	0.631015	-	-	0.631015	6.61578
Slc16a6	0.630818	-	-	0.630818	12.4682
4930471C04Rik	0.630348	-	-	0.630348	0.254453
B4galt1	0.629734	-	-	0.629734	15.2672
9930111J21Rik2	0.629274	-	-	0.629274	2.54453
2610042L04Rik	0.628394	-	-	0.628394	0.254453
Mertk	0.626895	-	-	0.626895	51.145
Tagap	0.626632	-	-	0.626632	0.508906
Ccl12	0.626415	-	-	0.626415	0.763359
Card9	0.626082	-	-	0.626082	1.01781
Cyp26a1	0.625393	-	-	0.625393	0.254453
Il6ra	0.624749	-	-	0.624749	15.7761
Mafb	0.624555	-	-	0.624555	2.54453
Pycard	0.623949	-	-	0.623949	9.16031
Sirpa	0.623564	-	-	0.623564	36.1323
Calhm2	0.622591	-	-	0.622591	4.83461
Rab3il1	0.621725	-	-	0.621725	3.81679
Apobec1	0.620875	-	-	0.620875	11.4504
Raet1e	0.620682	-	-	0.620682	2.29008
Skint3	0.62061	-	-	0.62061	0.763359
Mctp1	0.62003	-	-	0.62003	25.9542
Gm26778	0.619844	-	-	0.619844	0.254453
Adcy7	0.619713	-	-	0.619713	11.4504
1700058P15Rik	0.619399	-	-	0.619399	0.508906
Ebi3	0.6181	-	-	0.6181	1.01781
Prkcd	0.617001	-	-	0.617001	11.9593
Rapgef5	0.616811	-	-	0.616811	36.8957
Gm826	0.616526	-	-	0.616526	0.763359
Lrrc39	0.616116	-	-	0.616116	2.03562
Itgb3	0.615317	-	-	0.615317	3.05344
Tnfaip3	0.615291	-	-	0.615291	1.52672
Icam1	0.615018	-	-	0.615018	4.07125
Liph	0.613662	-	-	0.613662	2.54453
Gm26542	0.61233	-	-	0.61233	20.6107
Sh2b2	0.611891	-	-	0.611891	5.59796
Tgfbr2	0.611536	-	-	0.611536	26.972
2210417A02Rik	0.611483	-	-	0.611483	0.254453
4933428P19Rik	0.611483	-	-	0.611483	0.254453
Dennd2c	0.611185	-	-	0.611185	2.54453
Gm3468	0.610257	-	-	0.610257	2.03562
Tmem173	0.609726	-	-	0.609726	1.27226
1700017B05Rik	0.609511	-	-	0.609511	4.58015
Pla2g15	0.609136	-	-	0.609136	10.1781
Tmem156	0.607967	-	-	0.607967	1.27226
Smpd5	0.607698	-	-	0.607698	1.27226
Sh3bp2	0.607559	-	-	0.607559	4.58015
Clcf1	0.607412	-	-	0.607412	2.03562
Itgb5	0.607394	-	-	0.607394	29.2621
Cd300ld	0.60684	-	-	0.60684	0.254453
8030423F21Rik	0.606225	-	-	0.606225	0.763359
Lgmn	0.605999	-	-	0.605999	51.6539
Casp8	0.60594	-	-	0.60594	8.6514
Ifngr2	0.605332	-	-	0.605332	11.9593
Sall1	0.604137	-	-	0.604137	10.4326
Nxnl1	0.603684	-	-	0.603684	0.254453
Mrc1	0.603544	-	-	0.603544	4.07125
Arap3	0.603536	-	-	0.603536	10.4326
Gm3002	0.603402	-	-	0.603402	2.29008
Lrrc3	0.603386	-	-	0.603386	1.27226
Cass4	0.60267	-	-	0.60267	1.78117
Slc16a10	0.601756	-	-	0.601756	4.58015
Tm6sf1	0.601492	-	-	0.601492	9.92366
Fmnl1	0.601372	-	-	0.601372	5.08906
Gm4319	0.600345	-	-	0.600345	0.254453
Cysltr1	0.60025	-	-	0.60025	3.05344
Arhgap4	0.600057	-	-	0.600057	4.07125
Rab32	0.599428	-	-	0.599428	0.763359
Mgat4a	0.59911	-	-	0.59911	21.374
Cttnbp2nl	0.597715	-	-	0.597715	21.6285
Gm43603	0.593369	-	-	0.593369	5.59796
Gm26857	0.593032	-	-	0.593032	0.763359
Zfhx3	0.592893	-	-	0.592893	60.0509
Camk1d	0.592767	-	-	0.592767	49.6183
Coro2a	0.590788	-	-	0.590788	7.88804
RP23-343H23.2	0.590196	-	-	0.590196	0.763359
Gvin1	0.588925	-	-	0.588925	1.78117
Cenpm	0.588768	-	-	0.588768	0.763359
Cybb	0.588541	-	-	0.588541	0.763359
Abhd15	0.587138	-	-	0.587138	7.88804
Zeb2os	0.58575	-	-	0.58575	3.56234
Il16	0.583814	-	-	0.583814	3.05344
Rab27a	0.583494	-	-	0.583494	8.14249
Aoah	0.582191	-	-	0.582191	3.56234
Cfh	0.581852	-	-	0.581852	38.6768
Tlr12	0.577558	-	-	0.577558	0.508906
Gm9830	0.576872	-	-	0.576872	0.254453
Chn2	0.576247	-	-	0.576247	30.0254
Rreb1	0.57543	-	-	0.57543	53.1807
Gm42529	0.572911	-	-	0.572911	0.508906
Arl5c	0.572832	-	-	0.572832	2.29008
Gm28053	0.572315	-	-	0.572315	0.763359
Anxa3	0.572197	-	-	0.572197	16.5394
Gm3636	0.571955	-	-	0.571955	1.27226
Il4ra	0.568631	-	-	0.568631	3.30789
Dok3	0.568598	-	-	0.568598	4.3257
Maml3	0.568197	-	-	0.568197	54.9618
Slc7a8	0.566623	-	-	0.566623	14.2494
Mknk1	0.565287	-	-	0.565287	12.9771
Ubtd1	0.565261	-	-	0.565261	10.687
Rcsd1	0.562677	-	-	0.562677	8.6514
Chst7	0.562286	-	-	0.562286	2.03562
Gm12185	0.560581	-	-	0.560581	5.59796
Hyal5	0.558395	-	-	0.558395	1.01781
Lgals9	0.558219	-	-	0.558219	7.63359
Arrb2	0.557808	-	-	0.557808	11.7048
Gm9920	0.557274	-	-	0.557274	0.508906
Gng2	0.556537	-	-	0.556537	17.0483
Ubash3b	0.555729	-	-	0.555729	34.0967
Srgap2	0.553682	-	-	0.553682	63.3588
Hvcn1	0.553072	-	-	0.553072	3.05344
Prdm1	0.552738	-	-	0.552738	2.03562
Dnase2a	0.552174	-	-	0.552174	4.58015
Man2b1	0.551906	-	-	0.551906	11.4504
Dyrk4	0.549608	-	-	0.549608	0.763359
Elk3	0.547801	-	-	0.547801	13.2316
Cd80	0.546749	-	-	0.546749	2.29008
Tal1	0.546189	-	-	0.546189	3.56234
Gm26839	0.545356	-	-	0.545356	2.03562
Tanc2	0.544612	-	-	0.544612	80.4071
Gm43821	0.544029	-	-	0.544029	1.78117
Lyve1	0.543665	-	-	0.543665	0.254453
Gm28874	0.543569	-	-	0.543569	0.763359
H2-Ab1	0.543041	-	-	0.543041	1.78117
Epb41l2	0.542852	-	-	0.542852	42.2392
Akr1c12	0.542458	-	-	0.542458	0.254453
Cd74	0.540824	-	-	0.540824	3.05344
Slc9a9	0.5408	-	-	0.5408	48.0916
Sh3pxd2a	0.539452	-	-	0.539452	10.9415
Ldlrad4	0.538666	-	-	0.538666	63.1043
Basp1	0.537837	-	-	0.537837	20.3562
Trim14	0.53641	-	-	0.53641	4.83461
Kctd12	0.534511	-	-	0.534511	5.85242
Nfatc1	0.53338	-	-	0.53338	6.36132
Gm16337	0.532254	-	-	0.532254	2.79898
Tbc1d9	0.529854	-	-	0.529854	10.1781
Il13ra1	0.52954	-	-	0.52954	5.85242
Ctsh	0.528877	-	-	0.528877	13.9949
Pros1	0.528475	-	-	0.528475	17.3028
H2-Aa	0.52814	-	-	0.52814	1.01781
Ehd4	0.528027	-	-	0.528027	9.41476
Mef2a	0.527954	-	-	0.527954	48.3461
Tcirg1	0.527482	-	-	0.527482	10.687
2210406O10Rik	0.526742	-	-	0.526742	1.27226
Ptpn1	0.526363	-	-	0.526363	11.1959
Batf3	0.526109	-	-	0.526109	1.52672
Abcb1b	0.524168	-	-	0.524168	5.59796
Numb	0.523305	-	-	0.523305	47.8372
Scamp2	0.523222	-	-	0.523222	14.5038
1700011I03Rik	0.52224	-	-	0.52224	4.3257
Evl	0.521218	-	-	0.521218	22.1374
Serinc3	0.520755	-	-	0.520755	35.8779
Ltb	0.520515	-	-	0.520515	0.763359
Tbc1d16	0.520471	-	-	0.520471	13.7405
Wfdc17	0.520405	-	-	0.520405	0.763359
Xlr	0.519937	-	-	0.519937	1.27226
Gtf2h2	0.519315	-	-	0.519315	14.2494
Ddx43	0.518847	-	-	0.518847	1.27226
Map3k5	0.518387	-	-	0.518387	21.6285
Smap2	0.518272	-	-	0.518272	13.7405
Pmepa1	0.517753	-	-	0.517753	17.0483
Sp110	0.514547	-	-	0.514547	2.79898
Gm17231	0.514378	-	-	0.514378	21.374
Nfatc2	0.513861	-	-	0.513861	9.41476
Soga1	0.512776	-	-	0.512776	21.374
Plxna4os1	0.512733	-	-	0.512733	0.508906
1700112E06Rik	0.511864	-	-	0.511864	63.1043
Stk10	0.510872	-	-	0.510872	11.1959
Pik3r6	0.510137	-	-	0.510137	3.81679
Pacsin2	0.508954	-	-	0.508954	16.5394
Plxdc2	0.508788	-	-	0.508788	82.9517
Gm33370	0.508459	-	-	0.508459	1.27226
Lrmp	0.508438	-	-	0.508438	1.01781
Gm10974	0.507961	-	-	0.507961	2.29008
Gm37229	0.507763	-	-	0.507763	0.763359
Ptprj	0.506301	-	-	0.506301	49.6183
Man1c1	0.505772	-	-	0.505772	13.9949
Gm43291	0.505204	-	-	0.505204	0.508906
Plxna4	0.504479	-	-	0.504479	29.2621
Sall3	0.504034	-	-	0.504034	9.41476
Mbnl1	0.503826	-	-	0.503826	50.1272
Elmo1	0.502929	-	-	0.502929	72.2646
Gm43573	0.502282	-	-	0.502282	0.254453
Pf4	0.501509	-	-	0.501509	0.508906
Nav2	0.501474	-	-	0.501474	74.3003
Tslp	0.501331	-	-	0.501331	0.508906
Trpm2	0.500683	-	-	0.500683	4.83461
Fmnl3	0.500527	-	-	0.500527	9.66921
Aim2	0.500171	-	-	0.500171	8.6514
Gm42477	0.496397	-	-	0.496397	10.1781
Trim5	0.495959	-	-	0.495959	4.3257
Nfkbie	0.495895	-	-	0.495895	0.763359
Ankrd44	0.495399	-	-	0.495399	31.5522
Cdk6	0.493607	-	-	0.493607	8.90585
Glipr1	0.492338	-	-	0.492338	1.78117
Apobec3	0.491048	-	-	0.491048	10.1781
Inpp4b	0.489778	-	-	0.489778	41.7303
Hhex	0.489416	-	-	0.489416	1.52672
Slc25a45	0.488751	-	-	0.488751	2.29008
Cryl1	0.48842	-	-	0.48842	11.9593
Arrdc1	0.488274	-	-	0.488274	5.34351
Nuak1	0.487602	-	-	0.487602	10.4326
Trpv2	0.487467	-	-	0.487467	6.10687
Gm4070	0.486948	-	-	0.486948	1.27226
Arhgdib	0.486413	-	-	0.486413	4.3257
Gcnt1	0.486335	-	-	0.486335	2.29008
E2f3	0.486121	-	-	0.486121	9.41476
Ifitm10	0.486091	-	-	0.486091	6.61578
Arhgef6	0.485314	-	-	0.485314	9.66921
Ophn1	0.484555	-	-	0.484555	44.2748
Accs	0.483254	-	-	0.483254	3.81679
Lpar6	0.482523	-	-	0.482523	7.88804
Sipa1	0.481486	-	-	0.481486	8.14249
Tpst2	0.48085	-	-	0.48085	7.88804
Gm20685	0.479378	-	-	0.479378	1.78117
Olfml3	0.479185	-	-	0.479185	10.1781
Twf2	0.478395	-	-	0.478395	9.16031
Ppm1h	0.478355	-	-	0.478355	31.0433
Ggta1	0.478245	-	-	0.478245	7.37913
Snx29	0.47822	-	-	0.47822	40.458
Rp2	0.477474	-	-	0.477474	7.63359
4930444A19Rik	0.477294	-	-	0.477294	7.37913
Edem1	0.477247	-	-	0.477247	9.41476
Dok1	0.476704	-	-	0.476704	1.27226
Vav2	0.475801	-	-	0.475801	8.90585
Ivns1abp	0.474677	-	-	0.474677	12.9771
Cotl1	0.474256	-	-	0.474256	13.2316
Ifngr1	0.474141	-	-	0.474141	8.90585
Smpdl3b	0.472883	-	-	0.472883	3.05344
Dennd2d	0.472449	-	-	0.472449	0.763359
H2-Eb1	0.472181	-	-	0.472181	1.52672
Fam49b	0.472022	-	-	0.472022	45.5471
Arhgap27	0.469876	-	-	0.469876	3.30789
Lrch1	0.469861	-	-	0.469861	40.458
Sh3tc1	0.469782	-	-	0.469782	1.78117
Arsb	0.469451	-	-	0.469451	22.3919
Ctsd	0.46655	-	-	0.46655	31.5522
Rab39	0.465552	-	-	0.465552	9.16031
Sbno2	0.463707	-	-	0.463707	7.63359
Tlr4	0.463493	-	-	0.463493	3.30789
Ppcdc	0.46281	-	-	0.46281	11.1959
Gpr137b-ps	0.462613	-	-	0.462613	4.3257
Fgd3	0.462336	-	-	0.462336	6.10687
Orai1	0.460922	-	-	0.460922	7.37913
Grn	0.460374	-	-	0.460374	11.1959
Vrk2	0.459606	-	-	0.459606	8.6514
Bmp2k	0.458462	-	-	0.458462	18.5751
Pkn1	0.458012	-	-	0.458012	8.90585
Hps3	0.457557	-	-	0.457557	8.39695
Tbc1d8	0.457297	-	-	0.457297	6.87023
Rnase4	0.455802	-	-	0.455802	3.81679
A930033H14Rik	0.455479	-	-	0.455479	2.79898
Rnf113a1	0.455218	-	-	0.455218	1.52672
Etv6	0.454813	-	-	0.454813	28.7532
Zfp652	0.454259	-	-	0.454259	21.6285
Wasf2	0.453979	-	-	0.453979	29.5165
Adamts16	0.453354	-	-	0.453354	5.08906
Lhfpl2	0.453201	-	-	0.453201	13.486
Cep152	0.452153	-	-	0.452153	5.08906
Fam129a	0.451639	-	-	0.451639	5.34351
Rhobtb1	0.451578	-	-	0.451578	9.92366
Hps4	0.451309	-	-	0.451309	10.9415
Psmb9	0.451066	-	-	0.451066	2.54453
Ccnd3	0.450559	-	-	0.450559	33.8422
Daglb	0.450245	-	-	0.450245	8.90585
Ptpre	0.449428	-	-	0.449428	11.7048
Casp4	0.44932	-	-	0.44932	1.52672
Adrb2	0.449031	-	-	0.449031	2.54453
Ifi204	0.448675	-	-	0.448675	0.763359
Lrrk1	0.448557	-	-	0.448557	11.7048
Taok3	0.448011	-	-	0.448011	20.3562
Slc8a1	0.44761	-	-	0.44761	65.6489
Slc29a3	0.447603	-	-	0.447603	4.07125
Gm14230	0.44631	-	-	0.44631	0.254453
Exoc3l2	0.446304	-	-	0.446304	0.763359
Sp140	0.446146	-	-	0.446146	1.52672
Pip4k2a	0.445949	-	-	0.445949	34.8601
Cyfip1	0.445553	-	-	0.445553	26.2087
Plxdc1	0.445019	-	-	0.445019	6.36132
Irak2	0.444884	-	-	0.444884	20.3562
Ifnar2	0.442959	-	-	0.442959	9.41476
6330418K02Rik	0.441333	-	-	0.441333	2.03562
Col27a1	0.440703	-	-	0.440703	12.9771
Gm10552	0.440586	-	-	0.440586	1.27226
Rassf3	0.439854	-	-	0.439854	13.486
Rnf19b	0.438599	-	-	0.438599	4.3257
Ripk3	0.437564	-	-	0.437564	0.254453
Rap1gds1	0.437228	-	-	0.437228	29.771
Armc7	0.437134	-	-	0.437134	2.79898
Whrn	0.436624	-	-	0.436624	5.85242
Heatr5a	0.43637	-	-	0.43637	14.5038
D930015E06Rik	0.435545	-	-	0.435545	4.83461
Ralb	0.433356	-	-	0.433356	7.12468
Trim30a	0.43304	-	-	0.43304	8.6514
Map3k14	0.432644	-	-	0.432644	13.9949
Pon3	0.432454	-	-	0.432454	5.59796
Rgs2	0.431874	-	-	0.431874	5.08906
Gusb	0.430335	-	-	0.430335	6.61578
Rin3	0.430052	-	-	0.430052	3.30789
Cap1	0.429798	-	-	0.429798	9.41476
Pydc4	0.428788	-	-	0.428788	0.254453
Cyba	0.428129	-	-	0.428129	6.36132
Sh3kbp1	0.42706	-	-	0.42706	27.7354
C030034L19Rik	0.4264	-	-	0.4264	0.763359
Ttc7	0.426236	-	-	0.426236	5.08906
P2rx7	0.425806	-	-	0.425806	11.7048
Irgm2	0.425562	-	-	0.425562	4.3257
F830045P16Rik	0.425436	-	-	0.425436	1.52672
Ctc1	0.423911	-	-	0.423911	6.87023
Dgkd	0.423706	-	-	0.423706	19.084
Abhd12	0.423684	-	-	0.423684	21.374
Cflar	0.423562	-	-	0.423562	14.5038
Tfe3	0.423198	-	-	0.423198	5.59796
Snx5	0.423169	-	-	0.423169	12.4682
Mfng	0.422929	-	-	0.422929	2.03562
Tnfrsf21	0.422647	-	-	0.422647	9.16031
Fblim1	0.422538	-	-	0.422538	2.03562
Git2	0.42214	-	-	0.42214	22.9008
Trim12c	0.421841	-	-	0.421841	4.07125
9030617O03Rik	0.421702	-	-	0.421702	6.61578
Stat6	0.421115	-	-	0.421115	3.05344
Coro1a	0.421035	-	-	0.421035	4.3257
Gns	0.420758	-	-	0.420758	13.9949
Ctsz	0.420493	-	-	0.420493	10.687
Tlr2	0.420139	-	-	0.420139	1.27226
Primpol	0.417546	-	-	0.417546	3.81679
Itga9	0.41726	-	-	0.41726	15.2672
Ski	0.416032	-	-	0.416032	16.0305
Dock11	0.414236	-	-	0.414236	15.5216
Pvt1	0.413747	-	-	0.413747	17.8117
Mapk14	0.413247	-	-	0.413247	17.3028
Slc36a1	0.411679	-	-	0.411679	5.59796
Baz1a	0.411139	-	-	0.411139	4.83461
Tbc1d22a	0.409279	-	-	0.409279	15.2672
Jak3	0.409015	-	-	0.409015	1.01781
Rbpj	0.408146	-	-	0.408146	11.1959
Zfp217	0.407216	-	-	0.407216	2.54453
Pdgfb	0.40695	-	-	0.40695	5.59796
Trpv4	0.406513	-	-	0.406513	1.78117
Camk1	0.406439	-	-	0.406439	13.7405
Nr6a1os	0.405816	-	-	0.405816	8.6514
Gm11131	0.405505	-	-	0.405505	0.254453
Dennd4a	0.4053	-	-	0.4053	26.4631
Kcnrg	0.404946	-	-	0.404946	21.374
Gm8739	0.404706	-	-	0.404706	2.29008
Gsdmd	0.404697	-	-	0.404697	2.03562
Fchsd2	0.404511	-	-	0.404511	44.2748
Gm4951	0.404506	-	-	0.404506	2.54453
Fbrsl1	0.404298	-	-	0.404298	12.9771
Snx18	0.403934	-	-	0.403934	8.90585
Pla2g4a	0.40274	-	-	0.40274	14.2494
Fgf13	0.402123	-	-	0.402123	16.7939
Hacd4	0.402029	-	-	0.402029	2.79898
Skil	0.40154	-	-	0.40154	7.88804
Kbtbd12	0.40042	-	-	0.40042	0.763359
Tnfrsf23	0.399931	-	-	0.399931	1.01781
Zbtb34	0.399378	-	-	0.399378	4.58015
Cd101	0.399093	-	-	0.399093	0.508906
Frmd4b	0.399067	-	-	0.399067	43.5115
Oprm1	0.397972	-	-	0.397972	6.36132
Gm13248	0.397892	-	-	0.397892	1.27226
Tmcc3	0.397189	-	-	0.397189	70.9924
Spata13	0.397049	-	-	0.397049	11.4504
Nrip1	0.395761	-	-	0.395761	16.5394
Marcks	0.395757	-	-	0.395757	18.3206
Rptor	0.395151	-	-	0.395151	24.6819
Ssh2	0.394418	-	-	0.394418	60.5598
Kif21b	0.394086	-	-	0.394086	10.4326
Trp53cor1	0.393626	-	-	0.393626	6.87023
Zbp1	0.392698	-	-	0.392698	0.254453
Ccm2	0.392517	-	-	0.392517	11.7048
Sec61g	0.391362	-	-	0.391362	6.61578
Nol4l	0.390341	-	-	0.390341	8.39695
Adam33	0.389625	-	-	0.389625	0.763359
Serpine1	0.389379	-	-	0.389379	0.508906
Plgrkt	0.38904	-	-	0.38904	8.6514
Tubgcp5	0.388422	-	-	0.388422	12.9771
Csf2ra	0.388271	-	-	0.388271	12.4682
Eml4	0.388253	-	-	0.388253	17.8117
Rel	0.387353	-	-	0.387353	3.56234
Smad3	0.386892	-	-	0.386892	11.4504
Prelid2	0.386225	-	-	0.386225	1.27226
Rasgrp3	0.384768	-	-	0.384768	19.8473
Acer3	0.38465	-	-	0.38465	24.173
Tmem104	0.384601	-	-	0.384601	3.81679
Pqlc3	0.384276	-	-	0.384276	0.763359
Usp12	0.383181	-	-	0.383181	6.10687
Serpina3g	0.383069	-	-	0.383069	0.254453
Dhrs3	0.382639	-	-	0.382639	4.58015
Arhgap17	0.380648	-	-	0.380648	12.9771
BC055324	0.380367	-	-	0.380367	1.27226
D15Ertd621e	0.379962	-	-	0.379962	6.61578
Tet3	0.379648	-	-	0.379648	18.0662
Rasa4	0.379257	-	-	0.379257	6.10687
Ddx26b	0.379202	-	-	0.379202	19.084
Slfn2	0.379095	-	-	0.379095	1.27226
Mlxip	0.378948	-	-	0.378948	14.2494
Nek6	0.378271	-	-	0.378271	3.05344
Arid3b	0.377571	-	-	0.377571	3.30789
Slc12a9	0.376018	-	-	0.376018	7.12468
Tbc1d14	0.375796	-	-	0.375796	12.9771
Ecscr	0.375551	-	-	0.375551	1.78117
Piezo1	0.374883	-	-	0.374883	2.29008
Efhd2	0.374567	-	-	0.374567	5.08906
Gm13710	0.374499	-	-	0.374499	1.27226
Myh9	0.374488	-	-	0.374488	17.0483
Ildr1	0.374301	-	-	0.374301	0.508906
Klhl25	0.374294	-	-	0.374294	2.03562
Cds1	0.37398	-	-	0.37398	5.85242
Bmf	0.372875	-	-	0.372875	1.01781
Tor4a	0.371634	-	-	0.371634	0.508906
Cradd	0.370972	-	-	0.370972	13.486
Ppp1r3b	0.370877	-	-	0.370877	0.763359
Kdm2b	0.370735	-	-	0.370735	12.7226
Lrp5	0.370326	-	-	0.370326	6.87023
Mapkapk3	0.369756	-	-	0.369756	2.79898
RP23-152B12.3	0.369524	-	-	0.369524	0.254453
Arid3a	0.369213	-	-	0.369213	1.78117
Dcakd	0.369108	-	-	0.369108	11.7048
Stard9	0.367301	-	-	0.367301	18.8295
Pold4	0.366823	-	-	0.366823	3.30789
Acox3	0.366585	-	-	0.366585	5.08906
Tspan14	0.36637	-	-	0.36637	9.92366
Osbpl11	0.366248	-	-	0.366248	12.4682
Cln3	0.366186	-	-	0.366186	7.88804
Gm16867	0.365074	-	-	0.365074	2.54453
3110082I17Rik	0.364875	-	-	0.364875	9.66921
Syngr1	0.363354	-	-	0.363354	13.486
Psma8	0.362779	-	-	0.362779	1.01781
B2m	0.362623	-	-	0.362623	21.6285
Wdr44	0.361145	-	-	0.361145	7.63359
Ptchd1	0.361126	-	-	0.361126	3.30789
Rnpep	0.361095	-	-	0.361095	12.2137
Phc2	0.360995	-	-	0.360995	18.0662
Txk	0.36056	-	-	0.36056	0.763359
Rgs19	0.360486	-	-	0.360486	2.03562
Rrbp1	0.359016	-	-	0.359016	25.6997
Cd83	0.357256	-	-	0.357256	4.07125
St3gal5	0.356429	-	-	0.356429	13.2316
Arhgap39	0.353979	-	-	0.353979	25.6997
Mgat5	0.353333	-	-	0.353333	20.3562
St3gal6	0.352515	-	-	0.352515	20.1018
Tec	0.352074	-	-	0.352074	6.87023
Itga5	0.35174	-	-	0.35174	2.29008
Lpcat1	0.350084	-	-	0.350084	7.37913
Gm6277	0.349729	-	-	0.349729	6.61578
Neurl1a	0.349427	-	-	0.349427	4.07125
Vwa5a	0.349236	-	-	0.349236	3.56234
Slc4a7	0.348434	-	-	0.348434	6.87023
Galnt12	0.348087	-	-	0.348087	2.54453
Man1a	0.348014	-	-	0.348014	15.5216
Zc3hav1	0.347844	-	-	0.347844	7.37913
Dclre1c	0.345916	-	-	0.345916	6.10687
Hn1l	0.345894	-	-	0.345894	2.29008
Icosl	0.345683	-	-	0.345683	3.05344
Lmo2	0.345156	-	-	0.345156	5.08906
Pwwp2a	0.345008	-	-	0.345008	14.7583
Trim30d	0.344622	-	-	0.344622	2.79898
Rnf180	0.34404	-	-	0.34404	8.90585
Abcb4	0.343882	-	-	0.343882	3.81679
Rasgef1b	0.343301	-	-	0.343301	1.78117
Gm13251	0.341869	-	-	0.341869	1.01781
Pacs1	0.340477	-	-	0.340477	19.5929
C130026I21Rik	0.339791	-	-	0.339791	7.37913
Tmem140	0.339486	-	-	0.339486	2.54453
Rab3ip	0.339266	-	-	0.339266	5.85242
Pecr	0.338711	-	-	0.338711	4.07125
Bin1	0.338486	-	-	0.338486	29.771
Actr2	0.338478	-	-	0.338478	16.0305
Prcp	0.337103	-	-	0.337103	6.61578
Rasgrp4	0.336948	-	-	0.336948	1.78117
Sh3bp1	0.336759	-	-	0.336759	7.63359
Kcnk13	0.336544	-	-	0.336544	15.2672
Specc1	0.336477	-	-	0.336477	27.7354
Pkig	0.335514	-	-	0.335514	13.2316
Snx24	0.335495	-	-	0.335495	16.7939
Dynlt1f	0.335242	-	-	0.335242	1.01781
Klf3	0.335224	-	-	0.335224	12.2137
Grb2	0.334648	-	-	0.334648	13.9949
Wipf1	0.332983	-	-	0.332983	26.4631
Cebpg	0.332899	-	-	0.332899	6.61578
Bbs9	0.332605	-	-	0.332605	22.9008
Zswim6	0.332518	-	-	0.332518	35.1145
Ramp3	0.332353	-	-	0.332353	2.54453
H2-M3	0.331653	-	-	0.331653	1.78117
Gm26916	0.331171	-	-	0.331171	24.6819
Lims1	0.330908	-	-	0.330908	30.5344
Fhod1	0.330258	-	-	0.330258	1.78117
Rassf4	0.329886	-	-	0.329886	2.29008
Garnl3	0.328471	-	-	0.328471	13.486
Fam199x	0.327595	-	-	0.327595	5.59796
Sema4c	0.327186	-	-	0.327186	2.54453
Gbp7	0.326766	-	-	0.326766	2.54453
Dip2b	0.326645	-	-	0.326645	40.9669
Sft2d2	0.32567	-	-	0.32567	5.08906
Uvrag	0.325194	-	-	0.325194	17.3028
Bri3	0.324953	-	-	0.324953	11.4504
Llgl2	0.323679	-	-	0.323679	0.508906
Ggt5	0.322395	-	-	0.322395	2.79898
Gab2	0.322309	-	-	0.322309	43.0025
Ptp4a2	0.321612	-	-	0.321612	14.5038
Anks1	0.32147	-	-	0.32147	16.7939
H2-Q7	0.320933	-	-	0.320933	0.763359
Sgpl1	0.320579	-	-	0.320579	5.59796
Tmc1	0.32042	-	-	0.32042	1.78117
Ppp1r18	0.320097	-	-	0.320097	1.52672
Sh2d3c	0.318945	-	-	0.318945	5.08906
Gtf2ird2	0.318914	-	-	0.318914	5.08906
Csnk1e	0.31853	-	-	0.31853	7.63359
2310040G24Rik	0.318491	-	-	0.318491	1.27226
Nuak2	0.317838	-	-	0.317838	1.01781
Mtdh	0.317123	-	-	0.317123	26.7176
Picalm	0.315078	-	-	0.315078	21.374
Rcan3	0.314393	-	-	0.314393	5.34351
N4bp2l1	0.314017	-	-	0.314017	7.12468
Cldn18	0.313901	-	-	0.313901	2.29008
Senp2	0.313721	-	-	0.313721	13.486
Prex1	0.313524	-	-	0.313524	16.7939
Birc3	0.313398	-	-	0.313398	3.30789
Relb	0.313224	-	-	0.313224	3.56234
Fkbp5	0.312932	-	-	0.312932	9.41476
Gm19684	0.312137	-	-	0.312137	0.763359
Exoc6	0.311489	-	-	0.311489	10.1781
Prkch	0.311187	-	-	0.311187	6.36132
Nrp1	0.310569	-	-	0.310569	18.3206
Zrsr2	0.310203	-	-	0.310203	6.61578
Slc2a9	0.310187	-	-	0.310187	2.29008
Dgkz	0.309441	-	-	0.309441	8.90585
Npl	0.309243	-	-	0.309243	3.05344
Gm553	0.308508	-	-	0.308508	0.763359
Cerk	0.307881	-	-	0.307881	15.7761
Ppfia4	0.307738	-	-	0.307738	4.58015
Tpm3	0.307535	-	-	0.307535	14.2494
Diaph2	0.306992	-	-	0.306992	38.9313
H2-T24	0.306476	-	-	0.306476	1.01781
Il17ra	0.306283	-	-	0.306283	3.56234
2900089D17Rik	0.305022	-	-	0.305022	1.52672
Disc1	0.303767	-	-	0.303767	8.39695
Commd8	0.302418	-	-	0.302418	2.79898
Trpa1	0.302409	-	-	0.302409	0.254453
Rin2	0.302012	-	-	0.302012	14.7583
Fkbp15	0.301987	-	-	0.301987	9.16031
Plxna4os3	0.301604	-	-	0.301604	1.27226
Unc13d	0.301495	-	-	0.301495	1.01781
Atxn7l1	0.300678	-	-	0.300678	13.486
Madd	0.298703	-	-	0.298703	8.14249
Large	0.298133	-	-	0.298133	39.9491
Urah	0.298045	-	-	0.298045	0.254453
Samhd1	0.297157	-	-	0.297157	8.14249
Snx8	0.297101	-	-	0.297101	5.59796
B4galt6	0.297059	-	-	0.297059	7.88804
Stx2	0.296617	-	-	0.296617	4.3257
Mtmr4	0.296294	-	-	0.296294	4.58015
Tmem71	0.295363	-	-	0.295363	1.01781
Sncaip	0.295219	-	-	0.295219	11.4504
Rab8b	0.294852	-	-	0.294852	12.4682
Wdhd1	0.29346	-	-	0.29346	1.78117
Camkk2	0.293238	-	-	0.293238	5.85242
Arpc2	0.292352	-	-	0.292352	16.0305
Nek7	0.29163	-	-	0.29163	21.1196
Gm17268	0.291099	-	-	0.291099	0.763359
Rab1a	0.290631	-	-	0.290631	15.7761
Il20rb	0.290252	-	-	0.290252	1.27226
Pld1	0.289638	-	-	0.289638	16.5394
Chd9	0.2893	-	-	0.2893	65.3944
Limk1	0.288889	-	-	0.288889	5.59796
Amz1	0.288454	-	-	0.288454	3.56234
Hexa	0.286776	-	-	0.286776	8.90585
PISD	0.285358	-	-	0.285358	46.056
Marveld2	0.284929	-	-	0.284929	0.763359
4930599N23Rik	0.284006	-	-	0.284006	5.08906
Wnt16	0.279936	-	-	0.279936	0.254453
Rcbtb2	0.279752	-	-	0.279752	4.83461
Fhl3	0.27921	-	-	0.27921	0.763359
Dock4	0.278868	-	-	0.278868	69.4656
Gm26760	0.278824	-	-	0.278824	2.54453
Agmo	0.276793	-	-	0.276793	24.6819
Trim56	0.276765	-	-	0.276765	2.54453
Mtr	0.276079	-	-	0.276079	4.3257
Stxbp2	0.275645	-	-	0.275645	2.29008
Irak4	0.275209	-	-	0.275209	3.30789
Rbl1	0.274237	-	-	0.274237	2.03562
Tmem64	0.274154	-	-	0.274154	3.81679
Gngt2	0.273864	-	-	0.273864	1.01781
Cbl	0.273724	-	-	0.273724	14.5038
Rab11fip5	0.272344	-	-	0.272344	4.3257
Abcd2	0.271905	-	-	0.271905	7.12468
Cklf	0.271472	-	-	0.271472	6.61578
Zfp385a	0.27023	-	-	0.27023	3.81679
Gm26669	0.269628	-	-	0.269628	0.508906
Atp6v0a2	0.269615	-	-	0.269615	8.39695
Cep192	0.268155	-	-	0.268155	7.63359
Parp9	0.267863	-	-	0.267863	3.30789
Pyroxd2	0.267448	-	-	0.267448	1.27226
Myo1b	0.267192	-	-	0.267192	5.85242
4933423P22Rik	0.267155	-	-	0.267155	0.763359
Sema4d	0.266887	-	-	0.266887	9.41476
Ifi30	0.266599	-	-	0.266599	1.27226
Clint1	0.265636	-	-	0.265636	11.4504
Gbp5	0.264884	-	-	0.264884	1.01781
Cltc	0.264696	-	-	0.264696	19.5929
Heca	0.264586	-	-	0.264586	2.79898
Wdfy2	0.26369	-	-	0.26369	13.9949
Apba1	0.263409	-	-	0.263409	21.6285
H2-Q6	0.263396	-	-	0.263396	0.254453
Rnf213	0.263264	-	-	0.263264	6.36132
Cacnb2	0.263083	-	-	0.263083	39.9491
Ddx60	0.26239	-	-	0.26239	3.30789
Etv3	0.261886	-	-	0.261886	3.05344
Nckap5l	0.260315	-	-	0.260315	4.07125
Slc46a3	0.26014	-	-	0.26014	3.30789
Arhgap24	0.259982	-	-	0.259982	12.2137
Ccdc93	0.259733	-	-	0.259733	4.83461
Def6	0.259193	-	-	0.259193	1.78117
Zeb2	0.257889	-	-	0.257889	68.1934
Rap1gap2	0.257728	-	-	0.257728	5.59796
Nubp2	0.256896	-	-	0.256896	2.03562
Dse	0.256505	-	-	0.256505	4.3257
Mto1	0.25634	-	-	0.25634	6.10687
Fam72a	0.255818	-	-	0.255818	0.508906
Adam17	0.255513	-	-	0.255513	7.12468
Tnfaip8	0.254992	-	-	0.254992	5.85242
Gm16192	0.253305	-	-	0.253305	0.508906
Hltf	0.253062	-	-	0.253062	5.34351
Ubac2	0.252853	-	-	0.252853	16.285
Stk17b	0.252653	-	-	0.252653	1.27226
Stard5	0.252452	-	-	0.252452	6.36132
Fam134b	0.251902	-	-	0.251902	14.5038
Fam117b	0.251674	-	-	0.251674	13.2316
Eef2k	0.251305	-	-	0.251305	10.4326
Fscn1	0.251208	-	-	0.251208	6.61578
Phactr2	0.250167	-	-	0.250167	11.4504
Dagla	0.250138	-	-	0.250138	5.34351
Yif1b	0.249849	-	-	0.249849	6.87023
Akap13	0.24981	-	-	0.24981	22.6463
Fam46a	0.248651	-	-	0.248651	2.03562
Gsap	0.248555	-	-	0.248555	10.4326
Mboat7	0.248464	-	-	0.248464	7.37913
Rnaset2b	0.24635	-	-	0.24635	3.56234
Clcn5	0.244203	-	-	0.244203	6.10687
Chil1	0.241336	-	-	0.241336	3.30789
Gm21847	0.241309	-	-	0.241309	1.01781
C230088H06Rik	0.240994	-	-	0.240994	6.87023
Oas2	0.240215	-	-	0.240215	0.508906
AI467606	0.239873	-	-	0.239873	1.27226
Akna	0.239777	-	-	0.239777	0.763359
Coro7	0.239544	-	-	0.239544	6.10687
Fam196b	0.239427	-	-	0.239427	2.54453
Sec14l1	0.239019	-	-	0.239019	7.88804
Ap2a2	0.237299	-	-	0.237299	12.2137
Osgin1	0.236099	-	-	0.236099	0.254453
Pnpla7	0.235723	-	-	0.235723	19.3384
Ulk2	0.23527	-	-	0.23527	23.4097
BC028528	0.235219	-	-	0.235219	4.58015
Nlrc5	0.235086	-	-	0.235086	1.01781
Foxo4	0.235002	-	-	0.235002	1.27226
Ccz1	0.234571	-	-	0.234571	8.14249
Pfkfb3	0.234462	-	-	0.234462	4.3257
Ly6e	0.233884	-	-	0.233884	10.687
Cmip	0.233417	-	-	0.233417	21.374
Arid1a	0.232734	-	-	0.232734	17.3028
Clic1	0.232545	-	-	0.232545	8.39695
Epb41	0.230424	-	-	0.230424	10.687
BC037034	0.229474	-	-	0.229474	4.07125
Cacna2d4	0.229418	-	-	0.229418	9.16031
Actr3	0.228504	-	-	0.228504	11.1959
Trim36	0.227855	-	-	0.227855	3.81679
Ly96	0.227675	-	-	0.227675	1.52672
Mfsd1	0.227663	-	-	0.227663	3.30789
Rpl7a-ps5	0.227522	-	-	0.227522	2.79898
Itpr2	0.226592	-	-	0.226592	17.0483
Herc2	0.226514	-	-	0.226514	16.5394
Emp3	0.225943	-	-	0.225943	1.78117
Arpc1b	0.225774	-	-	0.225774	7.12468
Parp14	0.225705	-	-	0.225705	2.29008
Man1a2	0.225601	-	-	0.225601	13.9949
Vrk3	0.225087	-	-	0.225087	4.3257
Asph	0.225021	-	-	0.225021	13.7405
Ptbp3	0.224534	-	-	0.224534	8.39695
Xpot	0.224201	-	-	0.224201	5.59796
Slc16a7	0.223448	-	-	0.223448	5.08906
Agtr1b	0.223186	-	-	0.223186	0.508906
Dsc2	0.222893	-	-	0.222893	1.01781
Spsb2	0.222359	-	-	0.222359	2.29008
Cux1	0.222243	-	-	0.222243	24.4275
Ncoa3	0.221476	-	-	0.221476	13.7405
Il5ra	0.22144	-	-	0.22144	0.254453
Scoc	0.221431	-	-	0.221431	9.66921
Gm43936	0.220704	-	-	0.220704	0.508906
Irf1	0.219864	-	-	0.219864	2.54453
Cbfa2t3	0.219566	-	-	0.219566	2.29008
Erdr1	0.219359	-	-	0.219359	6.10687
Atp2b1	0.219264	-	-	0.219264	21.374
Mcoln1	0.21918	-	-	0.21918	3.30789
Tstd1	0.218446	-	-	0.218446	1.01781
Plekhj1	0.218311	-	-	0.218311	8.14249
Cst3	0.218193	-	-	0.218193	76.8448
Lrp12	0.218043	-	-	0.218043	3.81679
Havcr1	0.217742	-	-	0.217742	0.254453
Junb	0.217484	-	-	0.217484	2.29008
Olfml2b	0.216824	-	-	0.216824	2.29008
Ogfrl1	0.216635	-	-	0.216635	5.34351
Itpripl1	0.216482	-	-	0.216482	0.763359
Atp8b4	0.215967	-	-	0.215967	0.763359
Acsl4	0.21547	-	-	0.21547	7.63359
Wdfy1	0.214679	-	-	0.214679	7.63359
Cep68	0.214627	-	-	0.214627	8.90585
Slc9a7	0.214341	-	-	0.214341	5.34351
Mis18bp1	0.213383	-	-	0.213383	0.508906
Nav3	0.212984	-	-	0.212984	68.9567
Tgfbi	0.212533	-	-	0.212533	3.30789
Rnaset2a	0.211418	-	-	0.211418	3.05344
Col15a1	0.21126	-	-	0.21126	2.29008
Ppp1r18os	0.210936	-	-	0.210936	0.763359
Pip5k1c	0.210258	-	-	0.210258	4.3257
Znrf2	0.210167	-	-	0.210167	3.56234
Mfap3	0.209744	-	-	0.209744	7.37913
Zfp810	0.209391	-	-	0.209391	3.81679
Abhd17c	0.208776	-	-	0.208776	3.05344
Gm5087	0.208702	-	-	0.208702	1.78117
Usp8	0.208685	-	-	0.208685	7.37913
Gm15726	0.208084	-	-	0.208084	0.508906
H2-Q4	0.207998	-	-	0.207998	1.27226
Kntc1	0.20729	-	-	0.20729	0.508906
Rgl2	0.20725	-	-	0.20725	11.1959
Gm17606	0.20629	-	-	0.20629	0.254453
Rnf128	0.206197	-	-	0.206197	2.29008
Rogdi	0.2061	-	-	0.2061	8.14249
Lrrfip1	0.205078	-	-	0.205078	7.88804
Mvb12b	0.203888	-	-	0.203888	13.486
Kcnj2	0.203707	-	-	0.203707	1.01781
Btbd9	0.203341	-	-	0.203341	31.2977
Cdkn2aip	0.202706	-	-	0.202706	1.52672
Polr3c	0.202597	-	-	0.202597	4.83461
Susd1	0.200932	-	-	0.200932	1.78117
Plekha2	0.20057	-	-	0.20057	5.85242
Meg3	0.200025	-	-	0.200025	88.8041
Il6st	0.199889	-	-	0.199889	10.1781
Csmd3	0.199648	-	-	0.199648	64.1221
Gm43278	0.19923	-	-	0.19923	0.763359
Gdi2	0.199209	-	-	0.199209	14.7583
C7	0.198119	-	-	0.198119	0.254453
Plk3	0.197865	-	-	0.197865	1.52672
Prpsap2	0.197812	-	-	0.197812	5.34351
4930448E22Rik	0.197469	-	-	0.197469	0.254453
Slc24a3	0.196794	-	-	0.196794	23.9186
Tbk1	0.195379	-	-	0.195379	7.88804
Dock10	0.195354	-	-	0.195354	45.2926
Rd3	0.195209	-	-	0.195209	0.508906
Gm16599	0.195095	-	-	0.195095	8.6514
Asap1	0.194798	-	-	0.194798	38.6768
Jak1	0.194506	-	-	0.194506	11.7048
Ets1	0.194087	-	-	0.194087	5.85242
2810402E24Rik	0.194021	-	-	0.194021	2.29008
Gm26573	0.19314	-	-	0.19314	12.4682
Sptlc2	0.193061	-	-	0.193061	9.41476
Myo9b	0.192983	-	-	0.192983	7.88804
Ccdc109b	0.192686	-	-	0.192686	1.01781
Morc3	0.190283	-	-	0.190283	7.63359
Yars	0.189202	-	-	0.189202	7.63359
Gna12	0.188809	-	-	0.188809	13.486
Agps	0.188801	-	-	0.188801	10.1781
Msn	0.188401	-	-	0.188401	9.16031
Nadk	0.188162	-	-	0.188162	7.63359
Rap1b	0.18779	-	-	0.18779	5.59796
Gm4890	0.187554	-	-	0.187554	1.52672
Hpcal1	0.187496	-	-	0.187496	10.4326
Rnf216	0.187389	-	-	0.187389	19.5929
Csk	0.187185	-	-	0.187185	3.81679
Gm26816	0.185777	-	-	0.185777	3.81679
Nfe2l2	0.185587	-	-	0.185587	8.39695
Asxl1	0.185307	-	-	0.185307	17.3028
Parp8	0.185248	-	-	0.185248	18.5751
Prrc1	0.184186	-	-	0.184186	5.85242
Myo1c	0.184061	-	-	0.184061	3.30789
Adam15	0.183605	-	-	0.183605	7.88804
Rangap1	0.182595	-	-	0.182595	7.88804
Celf2	0.182522	-	-	0.182522	41.7303
Ptp4a3	0.181972	-	-	0.181972	3.05344
Trim12a	0.181447	-	-	0.181447	5.34351
Tep1	0.181364	-	-	0.181364	2.54453
Skap2	0.181345	-	-	0.181345	18.3206
Iqsec2	0.180845	-	-	0.180845	10.1781
Dct	0.180777	-	-	0.180777	0.508906
Ppp6r1	0.180573	-	-	0.180573	3.30789
Rapgef1	0.180375	-	-	0.180375	15.7761
Snx2	0.179925	-	-	0.179925	7.88804
Fam3a	0.179682	-	-	0.179682	2.54453
Ndn	0.179538	-	-	0.179538	17.3028
Adrbk1	0.178879	-	-	0.178879	3.30789
Neil2	0.178696	-	-	0.178696	0.763359
Tmod3	0.178694	-	-	0.178694	11.9593
Gfm2	0.177792	-	-	0.177792	8.39695
Cdca4	0.177296	-	-	0.177296	0.763359
Hivep3	0.177184	-	-	0.177184	26.972
Rock2	0.177139	-	-	0.177139	16.285
Renbp	0.176237	-	-	0.176237	2.29008
Gm16894	0.175218	-	-	0.175218	1.01781
Edem2	0.174976	-	-	0.174976	5.08906
Tmco4	0.174608	-	-	0.174608	2.29008
Trim47	0.174523	-	-	0.174523	2.29008
Fam111a	0.174037	-	-	0.174037	1.52672
Dtnbp1	0.173835	-	-	0.173835	6.10687
Arhgef1	0.17354	-	-	0.17354	11.7048
Snhg11	0.173531	-	-	0.173531	59.7964
Gm10848	0.172755	-	-	0.172755	1.27226
Sh2b3	0.171897	-	-	0.171897	1.52672
Pknox1	0.171757	-	-	0.171757	5.08906
Tnpo3	0.171652	-	-	0.171652	13.7405
Pid1	0.171396	-	-	0.171396	35.369
Acap2	0.170697	-	-	0.170697	24.173
Blvrb	0.170583	-	-	0.170583	3.05344
E030030I06Rik	0.170465	-	-	0.170465	0.508906
Tnfrsf25	0.17045	-	-	0.17045	0.763359
Vamp8	0.170132	-	-	0.170132	3.05344
Gm2716	0.169496	-	-	0.169496	0.254453
Tns1	0.169407	-	-	0.169407	8.6514
Gch1	0.168974	-	-	0.168974	1.78117
Slc44a2	0.168859	-	-	0.168859	3.81679
Gm20696	0.16873	-	-	0.16873	3.81679
Adrb1	0.16873	-	-	0.16873	0.763359
Eng	0.16865	-	-	0.16865	4.58015
Trim26	0.167388	-	-	0.167388	7.63359
Rtn1	0.167253	-	-	0.167253	44.0204
Clta	0.165692	-	-	0.165692	13.486
Fstl5	0.164641	-	-	0.164641	9.66921
Col6a1	0.164483	-	-	0.164483	1.01781
Frmd4a	0.163862	-	-	0.163862	55.9796
Gm27188	0.163696	-	-	0.163696	1.27226
Tram2	0.163535	-	-	0.163535	2.03562
Naalad2	0.163052	-	-	0.163052	2.03562
Rnf150	0.162487	-	-	0.162487	6.87023
Jade2	0.162022	-	-	0.162022	3.30789
Sp100	0.161766	-	-	0.161766	3.56234
Hdac9	0.161683	-	-	0.161683	7.63359
Dhrs7b	0.161552	-	-	0.161552	5.34351
Pkd1l2	0.161213	-	-	0.161213	1.01781
Ctsb	0.161121	-	-	0.161121	24.173
Shisa5	0.161007	-	-	0.161007	5.85242
Lsp1	0.160524	-	-	0.160524	1.01781
Cmpk2	0.16018	-	-	0.16018	1.01781
Igf1	0.159031	-	-	0.159031	1.27226
Eed	0.158841	-	-	0.158841	4.3257
Mef2d	0.158357	-	-	0.158357	9.41476
Arhgap5	0.157925	-	-	0.157925	38.6768
Crlf3	0.157896	-	-	0.157896	12.7226
Fndc3b	0.157882	-	-	0.157882	11.7048
Matk	0.157687	-	-	0.157687	7.12468
Rffl	0.157043	-	-	0.157043	18.5751
Tmem55b	0.156465	-	-	0.156465	7.63359
Gbp8	0.156238	-	-	0.156238	1.01781
Rapgef6	0.155864	-	-	0.155864	20.8651
Rnf169	0.154944	-	-	0.154944	11.9593
Coro1b	0.154906	-	-	0.154906	3.81679
Nrg3	0.154696	-	-	0.154696	44.2748
Lpcat3	0.154564	-	-	0.154564	10.1781
Ache	0.153647	-	-	0.153647	11.9593
Spag5	0.15344	-	-	0.15344	58.5242
Oma1	0.152875	-	-	0.152875	5.34351
Fcho2	0.152021	-	-	0.152021	20.1018
Sfmbt1	0.15192	-	-	0.15192	12.4682
Plaur	0.151832	-	-	0.151832	0.763359
H2-K1	0.151827	-	-	0.151827	7.37913
Cntnap2	0.151808	-	-	0.151808	40.2036
Phf14	0.151456	-	-	0.151456	23.1552
Gab3	0.150802	-	-	0.150802	4.07125
Pitpna	0.150582	-	-	0.150582	15.0127
Lrrc75a	0.150099	-	-	0.150099	1.52672
Zufsp	0.149405	-	-	0.149405	3.81679
Camk2d	0.149171	-	-	0.149171	32.57
Ctla2b	0.148806	-	-	0.148806	0.508906
Slc40a1	0.14844	-	-	0.14844	2.54453
Ankrd11	0.148266	-	-	0.148266	15.5216
Mgmt	0.147523	-	-	0.147523	2.54453
A930006I01Rik	0.146976	-	-	0.146976	0.254453
Syt1	0.146269	-	-	0.146269	21.374
Map3k3	0.146203	-	-	0.146203	12.2137
Dnmt3a	0.145655	-	-	0.145655	28.7532
Agpat9	0.145542	-	-	0.145542	1.78117
Gm12027	0.145303	-	-	0.145303	0.508906
Pan3	0.145153	-	-	0.145153	30.0254
Tnfrsf1a	0.144983	-	-	0.144983	2.29008
Clec1a	0.144892	-	-	0.144892	0.763359
Ehhadh	0.143031	-	-	0.143031	4.07125
Il1r1	0.14277	-	-	0.14277	1.27226
Zfp951	0.142733	-	-	0.142733	2.79898
Ctsf	0.142649	-	-	0.142649	6.10687
Phka2	0.142622	-	-	0.142622	5.59796
D230017M19Rik	0.142348	-	-	0.142348	3.81679
Mdfi	0.142179	-	-	0.142179	1.27226
Znfx1	0.142149	-	-	0.142149	4.07125
Fndc3a	0.142069	-	-	0.142069	12.7226
Brd7	0.142068	-	-	0.142068	6.61578
Tns3	0.14157	-	-	0.14157	15.2672
Ncoa4	0.141489	-	-	0.141489	1.52672
Galntl6	0.140503	-	-	0.140503	20.1018
Prkcb	0.140382	-	-	0.140382	28.2443
Naa30	0.140023	-	-	0.140023	2.29008
Irf2	0.139668	-	-	0.139668	15.0127
Clip1	0.138914	-	-	0.138914	12.7226
1700034H15Rik	0.138812	-	-	0.138812	0.508906
Msra	0.138688	-	-	0.138688	6.36132
Jmjd1c	0.138373	-	-	0.138373	33.3333
Idnk	0.137743	-	-	0.137743	4.07125
Mndal	0.137394	-	-	0.137394	1.01781
Pxn	0.137296	-	-	0.137296	6.36132
Irf2bp1	0.136962	-	-	0.136962	1.78117
Fam178a	0.136946	-	-	0.136946	11.9593
Tmem170b	0.136579	-	-	0.136579	3.81679
Tmem82	0.136279	-	-	0.136279	0.254453
Paqr3	0.135545	-	-	0.135545	12.2137
Ccnd1	0.135403	-	-	0.135403	2.29008
Tbc1d5	0.135108	-	-	0.135108	37.4046
Strada	0.135059	-	-	0.135059	8.6514
Cndp2	0.134904	-	-	0.134904	2.54453
Capzb	0.134709	-	-	0.134709	13.486
Ctsa	0.133663	-	-	0.133663	8.90585
Borcs6	0.133545	-	-	0.133545	2.29008
Sfi1	0.133153	-	-	0.133153	11.7048
Adam3	0.132956	-	-	0.132956	0.254453
Tnrc18	0.132499	-	-	0.132499	12.7226
Man2a1	0.132461	-	-	0.132461	5.08906
Stat3	0.132116	-	-	0.132116	15.7761
Npnt	0.131969	-	-	0.131969	1.52672
Nrg1	0.131718	-	-	0.131718	32.0611
Tbpl1	0.131674	-	-	0.131674	5.34351
Srrm3	0.131628	-	-	0.131628	4.83461
Ttc39b	0.131627	-	-	0.131627	4.83461
Zfyve28	0.131589	-	-	0.131589	2.79898
Arl15	0.131215	-	-	0.131215	23.9186
Immp2l	0.130588	-	-	0.130588	18.0662
Atp1b1	0.130337	-	-	0.130337	30.2799
Sgcz	0.12996	-	-	0.12996	33.5878
B830012L14Rik	0.129469	-	-	0.129469	1.78117
Wdfy3	0.129458	-	-	0.129458	18.5751
Cdca7	0.129112	-	-	0.129112	0.508906
Mad1l1	0.129081	-	-	0.129081	46.3104
Pdk1	0.128902	-	-	0.128902	3.81679
Fosl2	0.128507	-	-	0.128507	0.763359
Chd7	0.128327	-	-	0.128327	19.5929
Stat5b	0.12803	-	-	0.12803	11.4504
N4bp1	0.127793	-	-	0.127793	5.59796
Gm20388	0.127323	-	-	0.127323	61.3232
Itga6	0.127197	-	-	0.127197	17.0483
Cntn5	0.127072	-	-	0.127072	18.3206
Swap70	0.12661	-	-	0.12661	3.05344
Cdc42	0.12657	-	-	0.12657	18.5751
Tmem65	0.126387	-	-	0.126387	5.34351
Stmn2	0.126318	-	-	0.126318	19.5929
Mroh1	0.125869	-	-	0.125869	7.63359
Atp6v0a1	0.125691	-	-	0.125691	19.8473
P2rx4	0.125596	-	-	0.125596	7.88804
Urod	0.125434	-	-	0.125434	2.54453
Rhoa	0.12528	-	-	0.12528	11.4504
Poc1b	0.124364	-	-	0.124364	3.56234
Pabpc1	0.124109	-	-	0.124109	8.39695
Prkce	0.123933	-	-	0.123933	16.285
Sipa1l1	0.123707	-	-	0.123707	8.90585
Wnk1	0.123556	-	-	0.123556	33.8422
Gtdc1	0.123371	-	-	0.123371	15.5216
Morc4	0.12321	-	-	0.12321	1.01781
Gm28153	0.122803	-	-	0.122803	25.9542
Map2k1	0.122677	-	-	0.122677	16.285
Tbata	0.122492	-	-	0.122492	0.254453
Gnaq	0.121924	-	-	0.121924	32.8244
Vwc2l	0.121916	-	-	0.121916	3.30789
Tmem37	0.121775	-	-	0.121775	1.01781
1700037C18Rik	0.121774	-	-	0.121774	1.78117
Mkl1	0.12156	-	-	0.12156	10.4326
Gm10563	0.121305	-	-	0.121305	8.39695
A530013C23Rik	0.120782	-	-	0.120782	0.254453
Krcc1	0.12038	-	-	0.12038	8.90585
Ruvbl1	0.120334	-	-	0.120334	2.79898
Naa35	0.120152	-	-	0.120152	7.12468
Akap10	0.12004	-	-	0.12004	15.7761
Gm42956	0.1195	-	-	0.1195	0.254453
Ppp1r21	0.119363	-	-	0.119363	7.88804
Gm4841	0.118631	-	-	0.118631	0.254453
Znrf1	0.118605	-	-	0.118605	12.4682
Ccni	0.118523	-	-	0.118523	6.61578
Btg2	0.118213	-	-	0.118213	2.54453
Tmem229b	0.11772	-	-	0.11772	2.03562
Extl3	0.116446	-	-	0.116446	10.687
Klrk1	0.116407	-	-	0.116407	0.254453
Foxn3	0.116273	-	-	0.116273	28.7532
Tmem135	0.116148	-	-	0.116148	15.7761
Kif3b	0.116035	-	-	0.116035	5.59796
Sbf2	0.116022	-	-	0.116022	22.1374
Nosip	0.115851	-	-	0.115851	2.79898
Trim16	0.115745	-	-	0.115745	1.01781
Lingo2	0.115645	-	-	0.115645	27.9898
Trank1	0.115579	-	-	0.115579	2.54453
Nr6a1	0.115269	-	-	0.115269	23.9186
Unc5d	0.115078	-	-	0.115078	13.7405
Zfx	0.114966	-	-	0.114966	8.14249
Smyd3	0.114892	-	-	0.114892	22.3919
Nefl	0.114766	-	-	0.114766	28.2443
Htr2c	0.11434	-	-	0.11434	7.63359
Zfand3	0.114139	-	-	0.114139	18.8295
Nr1h2	0.113668	-	-	0.113668	5.34351
Calm2	0.113511	-	-	0.113511	41.9847
Ppt1	0.113009	-	-	0.113009	15.2672
Snx10	0.112761	-	-	0.112761	7.63359
Mir17hg	0.11241	-	-	0.11241	0.508906
Dcaf13	0.112165	-	-	0.112165	2.79898
Comt	0.11213	-	-	0.11213	23.6641
Nupr1	0.112083	-	-	0.112083	1.78117
Vps54	0.11202	-	-	0.11202	12.7226
Nfkbid	0.111793	-	-	0.111793	0.508906
Dnm2	0.111753	-	-	0.111753	18.3206
Tap2	0.111322	-	-	0.111322	5.34351
Ptprm	0.111125	-	-	0.111125	30.5344
Stxbp5	0.110821	-	-	0.110821	9.92366
Pcsk1n	0.110748	-	-	0.110748	36.6412
Gm27239	0.110179	-	-	0.110179	0.508906
Gm26533	0.11013	-	-	0.11013	2.79898
Pfkl	0.109736	-	-	0.109736	4.3257
Nptn	0.109493	-	-	0.109493	18.8295
Rap1a	0.10899	-	-	0.10899	17.0483
Pdia5	0.108689	-	-	0.108689	1.01781
Oxct1	0.108363	-	-	0.108363	19.5929
Acp2	0.108292	-	-	0.108292	3.30789
A230046K03Rik	0.107975	-	-	0.107975	6.87023
Tlcd2	0.107494	-	-	0.107494	2.29008
Sh3glb1	0.107484	-	-	0.107484	13.486
Lrfn5	0.107233	-	-	0.107233	14.5038
Gm20508	0.106933	-	-	0.106933	0.254453
Peli1	0.10673	-	-	0.10673	11.7048
Tcf20	0.106605	-	-	0.106605	15.2672
Tfpi	0.106528	-	-	0.106528	1.27226
Adam10	0.106479	-	-	0.106479	18.5751
Ripk2	0.10569	-	-	0.10569	3.05344
Uchl1	0.1056	-	-	0.1056	21.6285
H2-D1	0.105349	-	-	0.105349	11.1959
Med13l	0.105098	-	-	0.105098	12.2137
Ptprn	0.104093	-	-	0.104093	12.7226
Ece2	0.103913	-	-	0.103913	6.10687
Tsc22d4	0.103575	-	-	0.103575	15.0127
Gm29417	0.103571	-	-	0.103571	1.52672
Gm15537	0.103388	-	-	0.103388	1.01781
Mitf	0.10334	-	-	0.10334	18.0662
Celf1	0.103214	-	-	0.103214	18.5751
Cask	0.103089	-	-	0.103089	17.8117
Inpp5k	0.102916	-	-	0.102916	7.37913
Safb	0.102461	-	-	0.102461	11.7048
Snrk	0.102336	-	-	0.102336	11.7048
Gatad2a	0.102279	-	-	0.102279	6.10687
Fgl2	0.101867	-	-	0.101867	0.508906
Tmem86a	0.101773	-	-	0.101773	1.27226
Mfsd4	0.101595	-	-	0.101595	2.54453
Cdyl2	0.101578	-	-	0.101578	5.08906
Cep170	0.100891	-	-	0.100891	8.6514
Arhgap12	0.100703	-	-	0.100703	10.687
Tmsb4x	0.0999498	-	-	0.0999498	27.4809
Aftph	0.0998242	-	-	0.0998242	12.4682
Vasp	0.0995746	-	-	0.0995746	3.56234
Cnppd1	0.099231	-	-	0.099231	4.3257
Zcchc6	0.0987205	-	-	0.0987205	7.63359
Myl12b	0.0986843	-	-	0.0986843	7.88804
Zbtb4	0.0986625	-	-	0.0986625	6.10687
Pvrl2	0.0985805	-	-	0.0985805	1.78117
Usp29	0.098443	-	-	0.098443	11.4504
Ctps2	0.0979404	-	-	0.0979404	5.59796
Hmbox1	0.0978152	-	-	0.0978152	11.9593
Ncbp2	0.0977697	-	-	0.0977697	3.05344
Smim3	0.0975681	-	-	0.0975681	1.78117
Tbc1d4	0.097564	-	-	0.097564	9.16031
Penk	0.0973129	-	-	0.0973129	12.4682
Plekhm1	0.0967609	-	-	0.0967609	2.54453
Rras2	0.0965558	-	-	0.0965558	1.78117
Slc6a6	0.096434	-	-	0.096434	12.9771
Lrrc8d	0.0954294	-	-	0.0954294	10.9415
Aars	0.0953848	-	-	0.0953848	6.10687
Fxyd6	0.0953039	-	-	0.0953039	12.4682
Resp18	0.0950527	-	-	0.0950527	27.7354
Dnajc5	0.0949272	-	-	0.0949272	11.9593
Shb	0.0948825	-	-	0.0948825	2.54453
Gm26648	0.0948276	-	-	0.0948276	0.254453
Psmb4	0.0948258	-	-	0.0948258	6.36132
Snx13	0.094676	-	-	0.094676	9.41476
Bmp2	0.0946238	-	-	0.0946238	0.763359
Rasa1	0.0945505	-	-	0.0945505	9.16031
Cebpz	0.0945452	-	-	0.0945452	4.83461
Fat2	0.0944725	-	-	0.0944725	0.254453
Tacc1	0.0939227	-	-	0.0939227	13.2316
Zmiz1	0.0936715	-	-	0.0936715	13.9949
Rab14	0.093546	-	-	0.093546	13.9949
Zfp292	0.0930437	-	-	0.0930437	10.9415
Malt1	0.093009	-	-	0.093009	4.07125
Tbc1d23	0.0924159	-	-	0.0924159	12.2137
Herc4	0.0922903	-	-	0.0922903	13.9949
Ccdc12	0.0921647	-	-	0.0921647	11.9593
Erp29	0.0919136	-	-	0.0919136	10.1781
Pias1	0.091788	-	-	0.091788	20.3562
Ssbp4	0.0916416	-	-	0.0916416	5.08906
Afap1l1	0.091625	-	-	0.091625	5.59796
Stk11ip	0.0915632	-	-	0.0915632	1.52672
Kansl1	0.0911602	-	-	0.0911602	35.1145
Nagpa	0.0905807	-	-	0.0905807	1.27226
Kxd1	0.0905324	-	-	0.0905324	10.1781
Cab39	0.089779	-	-	0.089779	9.41476
Snx30	0.0896737	-	-	0.0896737	8.14249
Pld5	0.0895963	-	-	0.0895963	6.36132
Ythdf2	0.0895865	-	-	0.0895865	5.59796
Fam180a	0.0895225	-	-	0.0895225	0.254453
Rps26-ps1	0.0892844	-	-	0.0892844	5.34351
Pkd1	0.0892767	-	-	0.0892767	9.92366
C79798	0.0890535	-	-	0.0890535	3.30789
Arid5b	0.0889001	-	-	0.0889001	13.2316
Ttc28	0.0883978	-	-	0.0883978	21.374
Mfap4	0.0881963	-	-	0.0881963	0.254453
Il15	0.087886	-	-	0.087886	1.78117
Sppl3	0.08777	-	-	0.08777	12.4682
Hspa8	0.0876444	-	-	0.0876444	41.4758
Atp6v0b	0.0875188	-	-	0.0875188	29.2621
Dhx9	0.0873322	-	-	0.0873322	4.83461
Ddx20	0.0872177	-	-	0.0872177	2.54453
Mtus1	0.0871421	-	-	0.0871421	11.4504
Gtpbp2	0.087073	-	-	0.087073	6.87023
Gal	0.0870166	-	-	0.0870166	30.2799
Ash1l	0.086891	-	-	0.086891	22.9008
Hap1	0.0863887	-	-	0.0863887	10.1781
G3bp2	0.0861376	-	-	0.0861376	10.687
Slc38a9	0.0857609	-	-	0.0857609	13.2316
Chrm3	0.0856547	-	-	0.0856547	5.08906
Wwp2	0.0853842	-	-	0.0853842	10.1781
Exosc5	0.0853829	-	-	0.0853829	2.03562
Iscu	0.0852587	-	-	0.0852587	9.16031
Nsd1	0.0851331	-	-	0.0851331	31.8066
Maged1	0.0850075	-	-	0.0850075	19.3384
Dync1li1	0.0849653	-	-	0.0849653	7.88804
Akr1a1	0.0842541	-	-	0.0842541	10.9415
Eif4g3	0.0841286	-	-	0.0841286	22.3919
Snd1	0.084003	-	-	0.084003	11.4504
Lyst	0.0836263	-	-	0.0836263	9.66921
Slc15a4	0.0834108	-	-	0.0834108	2.03562
Gimap6	0.0833052	-	-	0.0833052	1.78117
Mkrn1	0.0832054	-	-	0.0832054	5.85242
Arf3	0.0831241	-	-	0.0831241	8.39695
Fus	0.0828729	-	-	0.0828729	32.8244
Chsy1	0.0827796	-	-	0.0827796	5.08906
Ubfd1	0.0827795	-	-	0.0827795	3.30789
D930020B18Rik	0.0825876	-	-	0.0825876	1.52672
Elf1	0.0824962	-	-	0.0824962	8.90585
Cacul1	0.0822451	-	-	0.0822451	8.90585
Arhgef40	0.0821607	-	-	0.0821607	6.10687
Gm44148	0.082125	-	-	0.082125	3.30789
Helz	0.0821195	-	-	0.0821195	10.1781
Wsb1	0.081994	-	-	0.081994	14.7583
4930451G09Rik	0.0818858	-	-	0.0818858	1.27226
Zc3hav1l	0.0818403	-	-	0.0818403	0.763359
Dnajc7	0.0817428	-	-	0.0817428	14.5038
Sergef	0.0816848	-	-	0.0816848	5.34351
Vgll4	0.0816173	-	-	0.0816173	17.8117
Ctdnep1	0.0813836	-	-	0.0813836	2.54453
Cacna1d	0.0812406	-	-	0.0812406	11.4504
Spidr	0.0810865	-	-	0.0810865	5.59796
Ep300	0.0806128	-	-	0.0806128	10.9415
Gm11110	0.0805425	-	-	0.0805425	0.763359
Oxr1	0.0804872	-	-	0.0804872	32.0611
Dynlt1c	0.0802403	-	-	0.0802403	1.78117
Gm30731	0.0801641	-	-	0.0801641	0.508906
Rtn3	0.0801105	-	-	0.0801105	32.57
Ano6	0.0799849	-	-	0.0799849	11.9593
Ppargc1b	0.0799735	-	-	0.0799735	1.78117
Abracl	0.0798958	-	-	0.0798958	1.52672
Rbm39	0.079106	-	-	0.079106	47.8372
Tln2	0.0789804	-	-	0.0789804	10.687
Gm26905	0.0789253	-	-	0.0789253	1.52672
Ftx	0.0788548	-	-	0.0788548	12.2137
Gnas	0.0784782	-	-	0.0784782	37.4046
Bin3	0.0779903	-	-	0.0779903	3.30789
Bmpr2	0.0779759	-	-	0.0779759	14.2494
Kat6a	0.0777248	-	-	0.0777248	9.41476
Spats2	0.0775049	-	-	0.0775049	5.59796
Smurf1	0.0774736	-	-	0.0774736	8.14249
Serp2	0.0774509	-	-	0.0774509	5.08906
Eif5b	0.0772225	-	-	0.0772225	10.4326
4933427G17Rik	0.0772025	-	-	0.0772025	1.27226
Adcy9	0.0770969	-	-	0.0770969	9.41476
Trmt1l	0.0769714	-	-	0.0769714	11.7048
Abhd6	0.0769637	-	-	0.0769637	8.90585
Prr14l	0.0764691	-	-	0.0764691	9.92366
Ppp1r9b	0.0760629	-	-	0.0760629	5.85242
Pten	0.0758413	-	-	0.0758413	12.9771
Spsb1	0.0753186	-	-	0.0753186	3.30789
Zc3h7a	0.0752135	-	-	0.0752135	9.16031
Shcbp1l	0.0751305	-	-	0.0751305	1.01781
Srrm2	0.0749623	-	-	0.0749623	30.2799
Gimap5	0.0747679	-	-	0.0747679	0.254453
Smarca2	0.0747112	-	-	0.0747112	19.5929
Mylip	0.0744601	-	-	0.0744601	14.7583
Ncaph	0.0742706	-	-	0.0742706	0.254453
Capza2	0.0742089	-	-	0.0742089	8.14249
Sfr1	0.0741942	-	-	0.0741942	5.85242
Ddx11	0.0741373	-	-	0.0741373	0.763359
Stx7	0.0740834	-	-	0.0740834	8.14249
Nod2	0.0740817	-	-	0.0740817	0.254453
Nol7	0.0737398	-	-	0.0737398	3.81679
Scn1a	0.0735811	-	-	0.0735811	8.6514
Osbpl8	0.0734555	-	-	0.0734555	11.4504
Kbtbd2	0.0732385	-	-	0.0732385	3.30789
Cd300lf	0.0725205	-	-	0.0725205	0.254453
Ubb	0.072451	-	-	0.072451	48.0916
Gm20618	0.0723076	-	-	0.0723076	0.254453
Ap1g1	0.0719488	-	-	0.0719488	7.12468
Atp7a	0.0718232	-	-	0.0718232	8.14249
Ctsl	0.0714465	-	-	0.0714465	10.687
Bex2	0.0711954	-	-	0.0711954	18.3206
Irak3	0.0711318	-	-	0.0711318	1.01781
Cartpt	0.0710698	-	-	0.0710698	12.4682
Cln6	0.0709456	-	-	0.0709456	1.01781
Nans	0.0708435	-	-	0.0708435	1.52672
Miat	0.0706931	-	-	0.0706931	8.14249
Celf4	0.0705676	-	-	0.0705676	15.0127
Scamp1	0.070442	-	-	0.070442	10.9415
Prickle3	0.0704361	-	-	0.0704361	0.508906
Gm26836	0.0701909	-	-	0.0701909	10.9415
Ube3b	0.0701432	-	-	0.0701432	3.81679
Slit3	0.0699397	-	-	0.0699397	7.37913
Gm3248	0.0698665	-	-	0.0698665	0.763359
A930017K11Rik	0.0697241	-	-	0.0697241	0.254453
A930004D18Rik	0.0697026	-	-	0.0697026	0.508906
Rilpl1	0.0696149	-	-	0.0696149	4.58015
Nos1ap	0.069563	-	-	0.069563	6.36132
Pbx3	0.0694375	-	-	0.0694375	18.0662
Dnajb1	0.0693296	-	-	0.0693296	2.03562
Tpd52	0.0693119	-	-	0.0693119	7.88804
Nhsl2	0.0691676	-	-	0.0691676	4.07125
Pak2	0.0689352	-	-	0.0689352	9.66921
Hecw1	0.0688763	-	-	0.0688763	5.85242
Ap1s2	0.0685702	-	-	0.0685702	4.58015
Mgea5	0.0685585	-	-	0.0685585	11.4504
Bach1	0.0682039	-	-	0.0682039	2.03562
Kcnq2	0.068118	-	-	0.068118	5.34351
Vti1a	0.0680563	-	-	0.0680563	22.3919
Sppl2a	0.0679307	-	-	0.0679307	5.85242
Ppp2ca	0.0678051	-	-	0.0678051	8.90585
Rps6ka3	0.0676796	-	-	0.0676796	9.16031
Impa2	0.0675088	-	-	0.0675088	1.01781
Cdh12	0.0674284	-	-	0.0674284	7.37913
Ly6h	0.0668006	-	-	0.0668006	17.5573
Pik3cb	0.0665464	-	-	0.0665464	4.58015
Spink10	0.0662395	-	-	0.0662395	3.56234
Fam174a	0.0661728	-	-	0.0661728	6.10687
Stard8	0.0660472	-	-	0.0660472	4.83461
Ppp2r4	0.0657961	-	-	0.0657961	10.1781
Zmynd8	0.065545	-	-	0.065545	20.8651
Arhgap31	0.0651683	-	-	0.0651683	13.486
Slmap	0.0650427	-	-	0.0650427	10.1781
Vps37b	0.0650307	-	-	0.0650307	3.30789
Sdk1	0.0649171	-	-	0.0649171	8.39695
Bcor	0.0648135	-	-	0.0648135	6.36132
Tubb4b	0.0647916	-	-	0.0647916	11.7048
Glyr1	0.064666	-	-	0.064666	9.66921
Dcaf12	0.0645404	-	-	0.0645404	6.61578
Zfp740	0.0644149	-	-	0.0644149	10.4326
Ddi2	0.0642893	-	-	0.0642893	7.63359
Tbkbp1	0.0640615	-	-	0.0640615	3.30789
Tomm20	0.0640382	-	-	0.0640382	10.1781
Nfkbiz	0.0640155	-	-	0.0640155	1.78117
Oas1a	0.063992	-	-	0.063992	0.254453
Fnbp4	0.0636615	-	-	0.0636615	7.63359
Tuba1a	0.0635359	-	-	0.0635359	29.2621
Copg2	0.0634103	-	-	0.0634103	11.7048
Cherp	0.0632848	-	-	0.0632848	7.63359
Fbxw4	0.0631592	-	-	0.0631592	9.92366
Bbs12	0.0631102	-	-	0.0631102	1.78117
Cct4	0.0627825	-	-	0.0627825	5.85242
Aldh1l2	0.0624996	-	-	0.0624996	1.01781
Klhl7	0.0624058	-	-	0.0624058	11.7048
Gm26532	0.0622812	-	-	0.0622812	4.58015
Chd3	0.0622803	-	-	0.0622803	5.59796
Gps2	0.0619036	-	-	0.0619036	7.88804
BC005537	0.061778	-	-	0.061778	8.39695
Padi2	0.0617077	-	-	0.0617077	5.59796
Cd276	0.0616181	-	-	0.0616181	0.763359
Bckdk	0.0615569	-	-	0.0615569	2.79898
Capza1	0.0615269	-	-	0.0615269	9.92366
Eef1a1	0.0614013	-	-	0.0614013	18.3206
Psap	0.0610246	-	-	0.0610246	44.7837
Fnip2	0.060899	-	-	0.060899	7.12468
Atpif1	0.0607735	-	-	0.0607735	19.3384
Slc50a1	0.0606479	-	-	0.0606479	7.37913
Shank1	0.0605224	-	-	0.0605224	5.59796
Myt1l	0.0603968	-	-	0.0603968	8.90585
Socs3	0.0603448	-	-	0.0603448	0.508906
Elavl4	0.0602712	-	-	0.0602712	8.14249
Ankrd37	0.0600372	-	-	0.0600372	1.52672
Cfap74	0.0600201	-	-	0.0600201	8.39695
Stat1	0.0598552	-	-	0.0598552	3.56234
Susd6	0.0596434	-	-	0.0596434	14.2494
Manea	0.0596022	-	-	0.0596022	3.30789
Pdia3	0.0593923	-	-	0.0593923	12.7226
Nfxl1	0.0593066	-	-	0.0593066	3.05344
Cdk14	0.0591411	-	-	0.0591411	18.8295
Scn2a1	0.0590156	-	-	0.0590156	9.92366
Zfp697	0.058933	-	-	0.058933	3.56234
Hnrnpul1	0.0586389	-	-	0.0586389	5.59796
Ankrd17	0.0585133	-	-	0.0585133	18.8295
Slc8b1	0.0584633	-	-	0.0584633	4.07125
Tm9sf2	0.0583877	-	-	0.0583877	7.63359
Fam122b	0.0583218	-	-	0.0583218	0.763359
St8sia6	0.0580832	-	-	0.0580832	1.78117
Tspan13	0.058011	-	-	0.058011	9.41476
Cd27	0.0576344	-	-	0.0576344	13.486
Creb1	0.0575088	-	-	0.0575088	9.41476
Taok1	0.0573832	-	-	0.0573832	17.5573
Elmsan1	0.0570065	-	-	0.0570065	4.58015
Setd4	0.0569248	-	-	0.0569248	3.30789
Cadm1	0.056881	-	-	0.056881	32.57
Nagk	0.0566298	-	-	0.0566298	6.36132
Mtus2	0.0565248	-	-	0.0565248	4.83461
Rnf130	0.0565043	-	-	0.0565043	12.9771
Rnf111	0.0563787	-	-	0.0563787	7.88804
Ifnar1	0.0562531	-	-	0.0562531	4.07125
Gm28501	0.0562166	-	-	0.0562166	1.52672
Myoc	0.0562003	-	-	0.0562003	0.254453
Chchd1	0.0557969	-	-	0.0557969	4.07125
Rpl8	0.0557509	-	-	0.0557509	11.1959
Ppp4c	0.0556253	-	-	0.0556253	5.59796
Tsc22d2	0.0552486	-	-	0.0552486	9.16031
Col6a3	0.0550045	-	-	0.0550045	0.763359
Sra1	0.0546208	-	-	0.0546208	6.10687
Trappc9	0.0541185	-	-	0.0541185	12.7226
Grin2d	0.0540811	-	-	0.0540811	1.01781
Gas6	0.053993	-	-	0.053993	7.63359
Lcorl	0.0538674	-	-	0.0538674	13.9949
Gpr50	0.0535477	-	-	0.0535477	0.254453
Csnk1d	0.0534907	-	-	0.0534907	8.6514
Sec63	0.0533651	-	-	0.0533651	8.6514
Fhitos	0.0532476	-	-	0.0532476	0.763359
Lamtor4	0.0532396	-	-	0.0532396	5.85242
Rpl22l1	0.0529884	-	-	0.0529884	8.14249
Slc17a5	0.0528629	-	-	0.0528629	5.34351
Calm1	0.0526118	-	-	0.0526118	27.4809
Pdyn	0.0525638	-	-	0.0525638	1.01781
Vsnl1	0.0521095	-	-	0.0521095	13.9949
Myo9a	0.0518584	-	-	0.0518584	21.6285
Zbed3	0.0514122	-	-	0.0514122	1.27226
Zfc3h1	0.0512305	-	-	0.0512305	10.4326
Cntrl	0.0509794	-	-	0.0509794	5.34351
Mdh2	0.0507283	-	-	0.0507283	11.4504
Hrasls	0.0506832	-	-	0.0506832	0.763359
Nsg2	0.0506027	-	-	0.0506027	9.41476
2010109A12Rik	0.0505738	-	-	0.0505738	1.01781
B3galt5	0.050522	-	-	0.050522	4.07125
Ap3b1	0.0504771	-	-	0.0504771	13.9949
Fbxo11	0.0503516	-	-	0.0503516	18.3206
1700013F07Rik	0.0503276	-	-	0.0503276	1.78117
Hnrnpc	0.0501005	-	-	0.0501005	12.4682
Mycbp2	0.0499749	-	-	0.0499749	28.7532
Dnmt1	0.0498981	-	-	0.0498981	2.79898
Inpp4a	0.0498493	-	-	0.0498493	7.63359
Dbnl	0.0497238	-	-	0.0497238	4.3257
Acvr1	0.0492215	-	-	0.0492215	7.63359
Crlf2	0.0491113	-	-	0.0491113	2.29008
Atg10	0.0490959	-	-	0.0490959	8.90585
Irs3	0.0490716	-	-	0.0490716	0.254453
Knop1	0.0489704	-	-	0.0489704	6.61578
Bhlhe22	0.0489265	-	-	0.0489265	0.254453
Rala	0.0487192	-	-	0.0487192	7.37913
Spopl	0.0485937	-	-	0.0485937	4.83461
Psmb8	0.0485049	-	-	0.0485049	1.27226
Gm6288	0.0484855	-	-	0.0484855	0.254453
Scaf11	0.0480914	-	-	0.0480914	7.37913
Myo5a	0.0475892	-	-	0.0475892	11.7048
Mrc2	0.047486	-	-	0.047486	2.54453
Gls	0.0474636	-	-	0.0474636	11.9593
Stk11	0.047338	-	-	0.047338	5.59796
Hsp90ab1	0.0470869	-	-	0.0470869	27.7354
Itgb1	0.0469613	-	-	0.0469613	8.39695
Trim44	0.0468358	-	-	0.0468358	10.687
Fcor	0.0467934	-	-	0.0467934	0.763359
RP23-455C13.7	0.0467382	-	-	0.0467382	1.52672
Ndfip1	0.0467102	-	-	0.0467102	9.66921
Plekhf2	0.0466019	-	-	0.0466019	1.27226
Lrp1	0.0465846	-	-	0.0465846	19.084
Scg2	0.0464591	-	-	0.0464591	18.0662
Abl1	0.0462079	-	-	0.0462079	9.92366
Dcaf5	0.0460824	-	-	0.0460824	8.39695
Sec22b	0.0458312	-	-	0.0458312	3.56234
Gm7160	0.0457861	-	-	0.0457861	0.763359
Treml1	0.045756	-	-	0.045756	0.254453
1810011O10Rik	0.0455902	-	-	0.0455902	0.254453
Ncstn	0.0455801	-	-	0.0455801	5.08906
Iffo1	0.0454545	-	-	0.0454545	6.87023
Vhl	0.045327	-	-	0.045327	1.78117
Smg1	0.0450779	-	-	0.0450779	13.486
Slc23a2	0.0448267	-	-	0.0448267	7.88804
Set	0.0445756	-	-	0.0445756	5.85242
Aldoa	0.04445	-	-	0.04445	25.9542
Trabd	0.0443245	-	-	0.0443245	3.81679
Sh3bgrl3	0.0441989	-	-	0.0441989	6.87023
Pfkfb4	0.0441511	-	-	0.0441511	4.83461
Dip2c	0.0440733	-	-	0.0440733	22.1374
Hint1	0.0438222	-	-	0.0438222	15.2672
Gm16068	0.0430649	-	-	0.0430649	0.254453
Eefsec	0.0428177	-	-	0.0428177	8.90585
Tuba1b	0.0426921	-	-	0.0426921	19.5929
Gxylt1	0.0424477	-	-	0.0424477	2.54453
Senp5	0.0423154	-	-	0.0423154	8.90585
Bcl2l11	0.0423133	-	-	0.0423133	2.29008
Tagln	0.0422745	-	-	0.0422745	0.254453
Sipa1l2	0.0421899	-	-	0.0421899	3.56234
Hook2	0.0421005	-	-	0.0421005	3.30789
Tmem164	0.0420643	-	-	0.0420643	16.5394
Mgrn1	0.0419387	-	-	0.0419387	9.41476
Lmln	0.0416876	-	-	0.0416876	4.07125
Ppp1r9a	0.041562	-	-	0.041562	21.374
Top2a	0.04142	-	-	0.04142	0.254453
Cds2	0.0413109	-	-	0.0413109	11.1959
Tmf1	0.0411853	-	-	0.0411853	5.85242
Ywhab	0.0410598	-	-	0.0410598	8.14249
Gnb2l1	0.0409342	-	-	0.0409342	4.58015
Akirin2	0.0408086	-	-	0.0408086	4.3257
Slc29a1	0.0408006	-	-	0.0408006	2.79898
Cenpf	0.0407825	-	-	0.0407825	0.508906
Nolc1	0.0404955	-	-	0.0404955	2.29008
Tpcn2	0.0400611	-	-	0.0400611	2.79898
Ppp1ca	0.0399297	-	-	0.0399297	6.10687
Slc43a2	0.0398041	-	-	0.0398041	10.1781
Tmem241	0.0396786	-	-	0.0396786	5.85242
Ndufb3	0.039553	-	-	0.039553	9.16031
Slc9a1	0.0393019	-	-	0.0393019	5.85242
Ep400	0.0390507	-	-	0.0390507	10.4326
Wdr26	0.0387996	-	-	0.0387996	11.7048
Eif4ebp1	0.0387931	-	-	0.0387931	0.508906
Ube3a	0.038674	-	-	0.038674	20.3562
Ppp4r1	0.0385485	-	-	0.0385485	6.36132
Pkn3	0.0384615	-	-	0.0384615	0.254453
Pepd	0.0384229	-	-	0.0384229	4.58015
Nemf	0.0380462	-	-	0.0380462	10.4326
Gm27010	0.0379642	-	-	0.0379642	1.01781
Mpnd	0.0378755	-	-	0.0378755	3.81679
1700003F12Rik	0.0378449	-	-	0.0378449	0.508906
Dennd1b	0.0377951	-	-	0.0377951	9.16031
Brox	0.0376695	-	-	0.0376695	3.56234
Plekhm3	0.0374184	-	-	0.0374184	9.41476
Ipmk	0.0371673	-	-	0.0371673	3.56234
Gm15723	0.036865	-	-	0.036865	0.508906
Snx6	0.0367906	-	-	0.0367906	8.39695
Map3k8	0.0365919	-	-	0.0365919	0.763359
Blvra	0.036444	-	-	0.036444	2.79898
Bag6	0.0362883	-	-	0.0362883	4.07125
Mapkapk2	0.0361627	-	-	0.0361627	3.30789
Papd5	0.0360372	-	-	0.0360372	8.6514
Galnt13	0.0359116	-	-	0.0359116	13.486
Eif3f	0.035786	-	-	0.035786	4.3257
Rpl10a	0.0356605	-	-	0.0356605	7.88804
L3mbtl4	0.0355977	-	-	0.0355977	1.78117
Gm17276	0.0355349	-	-	0.0355349	4.07125
Setd3	0.0354093	-	-	0.0354093	9.16031
Kcnc2	0.0352838	-	-	0.0352838	9.41476
Eya4	0.0352349	-	-	0.0352349	3.30789
Ppm1l	0.0351582	-	-	0.0351582	8.6514
Gm20642	0.0350326	-	-	0.0350326	5.34351
Epn3	0.0349801	-	-	0.0349801	0.508906
Cers6	0.0345304	-	-	0.0345304	5.34351
Tbc1d1	0.0344048	-	-	0.0344048	3.30789
Clec2d	0.0342793	-	-	0.0342793	1.78117
Akt1	0.0341537	-	-	0.0341537	3.81679
Ace	0.0341512	-	-	0.0341512	0.763359
Igfbp4	0.0340631	-	-	0.0340631	1.52672
Tbl1x	0.0340281	-	-	0.0340281	15.2672
Cbarp	0.0339026	-	-	0.0339026	7.63359
Thada	0.0334003	-	-	0.0334003	10.9415
Kcnh7	0.0331492	-	-	0.0331492	9.41476
Ppp5c	0.0330236	-	-	0.0330236	4.83461
Acss1	0.0329978	-	-	0.0329978	11.4504
Ddx6	0.0327725	-	-	0.0327725	10.9415
Dtx4	0.0326902	-	-	0.0326902	3.81679
Ptpn22	0.0326592	-	-	0.0326592	0.763359
Hmg20a	0.0326469	-	-	0.0326469	14.5038
Ensa	0.0325213	-	-	0.0325213	4.3257
Mtmr6	0.0323958	-	-	0.0323958	5.59796
Rnls	0.0322702	-	-	0.0322702	5.08906
Paip1	0.0321447	-	-	0.0321447	6.36132
Nenf	0.0320191	-	-	0.0320191	6.36132
Nanos1	0.031996	-	-	0.031996	0.763359
Cyth3	0.0318935	-	-	0.0318935	5.85242
Rbm17	0.0318435	-	-	0.0318435	3.30789
Glt1d1	0.0318421	-	-	0.0318421	2.29008
Ifi35	0.031768	-	-	0.031768	3.30789
Vat1l	0.0316424	-	-	0.0316424	7.12468
Fasn	0.0314729	-	-	0.0314729	4.07125
Lasp1	0.0313913	-	-	0.0313913	4.07125
0610010F05Rik	0.0312657	-	-	0.0312657	5.59796
Jag2	0.0311671	-	-	0.0311671	0.763359
Mirg	0.030889	-	-	0.030889	5.08906
Rnf157	0.0307634	-	-	0.0307634	7.37913
Nudcd3	0.0306379	-	-	0.0306379	17.5573
Ankrd13a	0.0305123	-	-	0.0305123	6.10687
Zfp866	0.0303867	-	-	0.0303867	2.79898
Nfu1	0.0301356	-	-	0.0301356	4.83461
Tmc6	0.0301227	-	-	0.0301227	2.54453
Polr2e	0.0298845	-	-	0.0298845	3.56234
Vps4a	0.0297923	-	-	0.0297923	2.79898
Lsm4	0.0297589	-	-	0.0297589	4.07125
Tpt1	0.0296334	-	-	0.0296334	11.4504
Ankfy1	0.0295078	-	-	0.0295078	8.6514
9130011E15Rik	0.0290055	-	-	0.0290055	11.4504
Clgn	0.0288963	-	-	0.0288963	1.52672
Atf6	0.02888	-	-	0.02888	7.63359
Nyap2	0.0282521	-	-	0.0282521	5.59796
Nucb1	0.0281266	-	-	0.0281266	4.58015
Nfkb1	0.028001	-	-	0.028001	12.7226
Heatr6	0.0276243	-	-	0.0276243	4.3257
Ostf1	0.0274987	-	-	0.0274987	4.3257
Isg20	0.0273541	-	-	0.0273541	0.254453
Galnt3	0.0273375	-	-	0.0273375	1.27226
Pald1	0.027122	-	-	0.027122	3.05344
9930012K11Rik	0.0270225	-	-	0.0270225	0.763359
Nln	0.0269965	-	-	0.0269965	4.58015
Ap2s1	0.0266198	-	-	0.0266198	5.85242
Pkm	0.0264942	-	-	0.0264942	26.4631
Atp2c1	0.0263687	-	-	0.0263687	17.3028
Psmb1	0.0262431	-	-	0.0262431	9.41476
Spp1	0.0261175	-	-	0.0261175	4.07125
Nell2	0.025992	-	-	0.025992	6.61578
Nrp2	0.0258664	-	-	0.0258664	7.37913
Txndc11	0.0256153	-	-	0.0256153	6.87023
Zyg11b	0.0253641	-	-	0.0253641	9.66921
Mcph1	0.0247363	-	-	0.0247363	3.81679
Sp3	0.0246107	-	-	0.0246107	6.61578
Gm12405	0.0246085	-	-	0.0246085	0.254453
Acsl5	0.0245125	-	-	0.0245125	1.78117
Prpf4	0.0244852	-	-	0.0244852	2.79898
Mbd2	0.0243596	-	-	0.0243596	5.34351
Gm26848	0.0242341	-	-	0.0242341	20.1018
Ap1s3	0.0242042	-	-	0.0242042	0.508906
Tmem234	0.0241085	-	-	0.0241085	10.687
Ppp3ca	0.0239829	-	-	0.0239829	37.1501
Ehbp1l1	0.0239485	-	-	0.0239485	2.29008
Tuft1	0.0238776	-	-	0.0238776	1.01781
Tmie	0.0238628	-	-	0.0238628	1.78117
Traf3	0.0238574	-	-	0.0238574	7.37913
Apopt1	0.0236062	-	-	0.0236062	6.61578
Mfhas1	0.0234807	-	-	0.0234807	7.63359
Etv5	0.0233551	-	-	0.0233551	7.37913
Col2a1	0.0233035	-	-	0.0233035	0.254453
Adcy3	0.0232295	-	-	0.0232295	4.07125
Itgav	0.023104	-	-	0.023104	16.285
Atp11c	0.0229784	-	-	0.0229784	7.88804
Slc7a1	0.0228528	-	-	0.0228528	3.81679
Acsl1	0.0227273	-	-	0.0227273	5.59796
Cggbp1	0.0226017	-	-	0.0226017	2.29008
Fam114a2	0.0223506	-	-	0.0223506	4.3257
Actb	0.0220994	-	-	0.0220994	34.6056
Aurkaip1	0.0219739	-	-	0.0219739	4.83461
Rps4x	0.0218483	-	-	0.0218483	8.90585
March1	0.0217228	-	-	0.0217228	32.0611
Zfp592	0.0215972	-	-	0.0215972	6.10687
Epha6	0.0213461	-	-	0.0213461	9.92366
Polr2a	0.0210949	-	-	0.0210949	6.36132
Saa3	0.0210544	-	-	0.0210544	0.254453
B4galt4	0.0209694	-	-	0.0209694	2.29008
Cd82	0.0208799	-	-	0.0208799	3.30789
Rsrp1	0.0207182	-	-	0.0207182	36.1323
Zfp706	0.0205927	-	-	0.0205927	4.83461
Gpatch2l	0.020216	-	-	0.020216	5.59796
Eif3d	0.0200904	-	-	0.0200904	3.05344
Arcn1	0.0199648	-	-	0.0199648	7.12468
Fam101b	0.0198393	-	-	0.0198393	3.05344
Cables1	0.0197614	-	-	0.0197614	8.39695
Clock	0.0195881	-	-	0.0195881	11.4504
Ints3	0.0194626	-	-	0.0194626	5.85242
Lrrc32	0.0193966	-	-	0.0193966	0.254453
Ywhag	0.019337	-	-	0.019337	11.9593
Tapbp	0.0192115	-	-	0.0192115	3.56234
Cars	0.0190859	-	-	0.0190859	3.56234
Ceacam2	0.0190157	-	-	0.0190157	1.78117
Rpl7a	0.0189603	-	-	0.0189603	2.79898
Sncb	0.0188348	-	-	0.0188348	9.41476
Gng3	0.0187092	-	-	0.0187092	5.34351
Rpl6	0.0185836	-	-	0.0185836	8.14249
Tnip2	0.0182069	-	-	0.0182069	3.30789
Dctn1	0.0179558	-	-	0.0179558	4.07125
Grin1	0.0178302	-	-	0.0178302	5.85242
Smad7	0.0178291	-	-	0.0178291	5.08906
Tubb2a	0.0177047	-	-	0.0177047	13.7405
Tmem178	0.0175791	-	-	0.0175791	2.54453
Rab3a	0.0174535	-	-	0.0174535	13.2316
Ppid	0.017328	-	-	0.017328	4.3257
Zbtb7a	0.0168257	-	-	0.0168257	8.14249
Bax	0.0167002	-	-	0.0167002	7.37913
Stx17	0.0165746	-	-	0.0165746	3.81679
Brk1	0.016449	-	-	0.016449	7.37913
Cuedc2	0.0160723	-	-	0.0160723	5.85242
Kdm2a	0.0159468	-	-	0.0159468	15.2672
Unc80	0.0158212	-	-	0.0158212	10.687
Mest	0.0155836	-	-	0.0155836	1.52672
2810428I15Rik	0.0155701	-	-	0.0155701	4.3257
Coro1c	0.0154445	-	-	0.0154445	6.36132
Ppp1r12c	0.0153189	-	-	0.0153189	3.81679
Gapvd1	0.0150678	-	-	0.0150678	12.2137
Gpr155	0.0149422	-	-	0.0149422	3.81679
Colgalt1	0.0148167	-	-	0.0148167	3.56234
Arid4a	0.01444	-	-	0.01444	8.90585
Bptf	0.0143144	-	-	0.0143144	13.7405
Obfc1	0.0141888	-	-	0.0141888	2.54453
Dennd6a	0.0140633	-	-	0.0140633	10.1781
Otud5	0.0139377	-	-	0.0139377	6.10687
Rab3c	0.0138122	-	-	0.0138122	8.14249
Rpl23a-ps3	0.0136866	-	-	0.0136866	4.07125
Ift52	0.013561	-	-	0.013561	5.59796
Rps15a	0.0134355	-	-	0.0134355	3.81679
Srl	0.0133099	-	-	0.0133099	2.03562
Ssb	0.0131843	-	-	0.0131843	8.14249
Rasa3	0.01305	-	-	0.01305	8.6514
Atp5g3	0.0129332	-	-	0.0129332	8.39695
[truncated: 95 more rows]

## Sheet: Oligodendrocytes
gene	combined_expr_specificity	cellex_score_zhang	expr_proportion_zhang	cellex_score_ludwig	expr_proportion_ludwig
Sec14l5	0.985991	-	-	0.985991	35.3131
Prr5l	0.981574	-	-	0.981574	85.1823
St18	0.978304	-	-	0.978304	83.5667
Mog	0.972018	-	-	0.972018	52.2696
A230001M10Rik	0.971456	-	-	0.971456	29.2507
Gm28376	0.96425	-	-	0.96425	26.7118
Plekhh1	0.963135	-	-	0.963135	32.882
Hapln2	0.962791	-	-	0.962791	35.2362
Fa2h	0.962109	-	-	0.962109	41.0217
Slc24a2	0.96188	-	-	0.96188	93.3067
Mag	0.959956	-	-	0.959956	59.763
RP23-44H21.1	0.959405	-	-	0.959405	18.8029
Pls1	0.957863	-	-	0.957863	22.7573
Insc	0.956926	-	-	0.956926	15.0792
A330015K06Rik	0.955901	-	-	0.955901	23.8498
Ugt8a	0.952556	-	-	0.952556	36.1286
Nkain1	0.952099	-	-	0.952099	21.0956
Gm13905	0.946658	-	-	0.946658	7.9243
Gm816	0.945563	-	-	0.945563	8.95522
D7Ertd443e	0.943224	-	-	0.943224	14.7407
Pak7	0.942433	-	-	0.942433	52.1773
Pik3c2b	0.942261	-	-	0.942261	20.7263
Adamts4	0.941421	-	-	0.941421	9.26296
Aspa	0.941074	-	-	0.941074	41.6218
Cyp2j12	0.940232	-	-	0.940232	8.17049
Map7	0.938163	-	-	0.938163	55.4547
Mobp	0.936882	-	-	0.936882	49.3614
Synj2	0.936697	-	-	0.936697	22.8958
Myrf	0.936442	-	-	0.936442	14.4638
Cldn14	0.935965	-	-	0.935965	8.18587
Jph1	0.933899	-	-	0.933899	13.0789
Tnni1	0.933461	-	-	0.933461	9.47838
Pstpip2	0.932839	-	-	0.932839	23.9114
Gm16168	0.931901	-	-	0.931901	36.2671
Anln	0.930692	-	-	0.930692	23.0805
Gm42495	0.929208	-	-	0.929208	5.69318
Ypel2	0.92892	-	-	0.92892	46.3456
Gm42413	0.928047	-	-	0.928047	16.1563
Gm12324	0.926108	-	-	0.926108	5.63164
Shtn1	0.926045	-	-	0.926045	31.8203
Onecut2	0.925987	-	-	0.925987	10.7401
Slain1	0.925644	-	-	0.925644	19.6646
Enpp6	0.924133	-	-	0.924133	11.8634
Trim59	0.923956	-	-	0.923956	10.4324
Sytl2	0.92336	-	-	0.92336	20.7263
Tnfaip6	0.923168	-	-	0.923168	18.1105
Gm10863	0.922467	-	-	0.922467	11.4325
Galnt6	0.920046	-	-	0.920046	10.894
Ermn	0.918907	-	-	0.918907	12.9251
Arhgap23	0.918747	-	-	0.918747	57.2396
Ano4	0.915832	-	-	0.915832	47.6996
Klhl2	0.91555	-	-	0.91555	42.6066
Gm29455	0.914669	-	-	0.914669	5.44699
Rab37	0.914274	-	-	0.914274	6.43176
Ppp1r16b	0.913773	-	-	0.913773	42.3296
Nipal4	0.913608	-	-	0.913608	6.3856
Klk6	0.913132	-	-	0.913132	10.8786
Ephb1	0.912594	-	-	0.912594	29.5584
Cntn2	0.911942	-	-	0.911942	17.0949
Slc25a13	0.91149	-	-	0.91149	22.9882
Kctd13	0.91059	-	-	0.91059	26.8195
Plxnb3	0.910215	-	-	0.910215	15.3408
Edil3	0.909593	-	-	0.909593	86.1825
Pla2g3	0.9095	-	-	0.9095	13.5098
Prima1	0.909261	-	-	0.909261	9.81689
Frmd5	0.908473	-	-	0.908473	72.6266
Arsg	0.905957	-	-	0.905957	15.9717
Nfe2l3	0.905429	-	-	0.905429	10.7709
Pde8a	0.905093	-	-	0.905093	25.8501
Tmeff2	0.904209	-	-	0.904209	90.1062
Tubb4a	0.904075	-	-	0.904075	36.6056
Usp31	0.904015	-	-	0.904015	26.2194
Ninj2	0.903318	-	-	0.903318	26.7426
Tspan2	0.901948	-	-	0.901948	21.6187
Scd3	0.899584	-	-	0.899584	5.47777
Rtkn2	0.897852	-	-	0.897852	5.3239
Gm10701	0.897126	-	-	0.897126	6.04708
Pex5l	0.896347	-	-	0.896347	80.6739
Spock1	0.895735	-	-	0.895735	37.852
Hecw2	0.895589	-	-	0.895589	50.2847
Opalin	0.89465	-	-	0.89465	13.0635
Kcna1	0.89258	-	-	0.89258	14.4638
Gal3st1	0.891501	-	-	0.891501	14.7561
Jakmip3	0.891339	-	-	0.891339	10.3247
Enpp2	0.890408	-	-	0.890408	62.0711
Rffl	0.889949	-	-	0.889949	35.9902
Il1rap	0.889465	-	-	0.889465	27.5581
Pcolce2	0.888653	-	-	0.888653	8.37052
1700047M11Rik	0.888013	-	-	0.888013	16.0948
Car2	0.887817	-	-	0.887817	39.2984
Prox1	0.887792	-	-	0.887792	13.7713
Pak1	0.885404	-	-	0.885404	32.5435
Dock10	0.885031	-	-	0.885031	78.4121
Map6d1	0.884683	-	-	0.884683	5.52393
Eml1	0.884188	-	-	0.884188	38.0828
Sgk2	0.883572	-	-	0.883572	3.24665
Atp10b	0.881966	-	-	0.881966	4.00062
RP24-263G24.2	0.881848	-	-	0.881848	3.26204
Gjb1	0.881781	-	-	0.881781	7.40114
Kctd3	0.880934	-	-	0.880934	17.7412
Zfp536	0.880538	-	-	0.880538	54.7161
Gm37459	0.877862	-	-	0.877862	6.29328
Kcnk13	0.875029	-	-	0.875029	21.6341
Slc22a27	0.874275	-	-	0.874275	7.60117
Gm42756	0.872926	-	-	0.872926	4.29297
Palm2	0.8729	-	-	0.8729	27.7427
Emilin2	0.872352	-	-	0.872352	2.81582
Olfml1	0.872298	-	-	0.872298	15.9101
Gm11659	0.872192	-	-	0.872192	12.6481
Gm28609	0.869173	-	-	0.869173	3.15433
4930419G24Rik	0.869041	-	-	0.869041	7.75504
Cldn11	0.868992	-	-	0.868992	26.8657
Il33	0.868376	-	-	0.868376	21.8034
Bcas1	0.867251	-	-	0.867251	34.236
Gm5535	0.866715	-	-	0.866715	2.10802
Prox1os	0.866401	-	-	0.866401	4.50839
Adipor2	0.864692	-	-	0.864692	37.8366
Kndc1	0.864118	-	-	0.864118	19.6184
Gm13403	0.863796	-	-	0.863796	1.72334
Cpm	0.862905	-	-	0.862905	13.0328
Clmn	0.862438	-	-	0.862438	23.8037
Litaf	0.862384	-	-	0.862384	17.5873
Tmprss5	0.861842	-	-	0.861842	4.90845
Galnt5	0.860987	-	-	0.860987	2.04647
Ldb3	0.85972	-	-	0.85972	6.01631
9330182L06Rik	0.859279	-	-	0.859279	16.6333
Mbp	0.859172	-	-	0.859172	85.7363
S1pr5	0.858168	-	-	0.858168	4.493
Dgki	0.858161	-	-	0.858161	45.4685
Pkd2l1	0.857565	-	-	0.857565	4.07755
Tmem63a	0.857395	-	-	0.857395	11.0786
Enox1	0.857121	-	-	0.857121	37.0519
Erbb3	0.856702	-	-	0.856702	5.53931
Stmn4	0.856178	-	-	0.856178	35.1746
Tmbim1	0.855409	-	-	0.855409	23.6344
Sez6l2	0.853396	-	-	0.853396	25.1116
Ttll7	0.852994	-	-	0.852994	28.7121
Bfsp2	0.852597	-	-	0.852597	6.83182
Hcn2	0.851956	-	-	0.851956	11.5556
Adamtsl4	0.851658	-	-	0.851658	8.44745
Creb5	0.851102	-	-	0.851102	27.158
Arhgef10	0.850788	-	-	0.850788	24.9577
Cdk18	0.849995	-	-	0.849995	5.30851
Slc12a2	0.849941	-	-	0.849941	27.2965
Dip2a	0.848739	-	-	0.848739	17.9258
7630403G23Rik	0.847712	-	-	0.847712	1.61563
Sh3tc2	0.846689	-	-	0.846689	8.12433
Grm3	0.844981	-	-	0.844981	50.3462
Gnai1	0.844937	-	-	0.844937	16.6333
Osbpl7	0.844458	-	-	0.844458	13.202
D16Ertd472e	0.844217	-	-	0.844217	4.00062
Tmod1	0.84351	-	-	0.84351	12.248
Gm12145	0.843433	-	-	0.843433	1.78489
Efnb3	0.842398	-	-	0.842398	21.6495
Plp1	0.842297	-	-	0.842297	93.1682
Gjc3	0.840105	-	-	0.840105	21.8341
Ppp1r14a	0.839764	-	-	0.839764	12.6789
Tmem151a	0.839302	-	-	0.839302	14.3561
Hhip	0.839217	-	-	0.839217	9.37067
4930593A02Rik	0.839093	-	-	0.839093	7.35498
Myo1d	0.838889	-	-	0.838889	30.9124
Cyp27a1	0.838061	-	-	0.838061	16.2179
Rnf220	0.837165	-	-	0.837165	73.1036
Elovl7	0.837039	-	-	0.837039	20.6647
Aatk	0.836487	-	-	0.836487	34.8207
Plcl1	0.832461	-	-	0.832461	86.5826
Pde4b	0.832373	-	-	0.832373	96.4764
Dscaml1	0.83232	-	-	0.83232	43.4836
RP23-402A4.1	0.832136	-	-	0.832136	1.78489
Cyp3a13	0.831237	-	-	0.831237	2.63117
Zdhhc14	0.830692	-	-	0.830692	33.5282
Pigz	0.830382	-	-	0.830382	6.86259
RP24-63G4.13	0.829127	-	-	0.829127	2.69272
Depdc1b	0.828815	-	-	0.828815	1.56947
Rasal1	0.82878	-	-	0.82878	2.87737
Murc	0.828688	-	-	0.828688	5.50854
Spock3	0.828644	-	-	0.828644	50.7001
Gng7	0.828353	-	-	0.828353	8.61671
Gjc2	0.827582	-	-	0.827582	4.47761
Pacs2	0.827575	-	-	0.827575	24.3268
Dusp10	0.824901	-	-	0.824901	6.15479
Tmeff1	0.824707	-	-	0.824707	23.419
Phldb1	0.824132	-	-	0.824132	27.8351
Itpk1	0.823141	-	-	0.823141	15.31
Kif13b	0.82228	-	-	0.82228	38.8367
A230009B12Rik	0.820713	-	-	0.820713	3.50823
Ppfibp2	0.819677	-	-	0.819677	21.6187
Slc44a1	0.819082	-	-	0.819082	31.0355
Daam2	0.817979	-	-	0.817979	31.174
Arhgef37	0.817498	-	-	0.817498	8.49361
Lrrc8b	0.816786	-	-	0.816786	13.0789
St8sia3os	0.816156	-	-	0.816156	2.00031
Klhl4	0.815953	-	-	0.815953	8.01662
Chdh	0.815545	-	-	0.815545	2.66195
Sept4	0.815467	-	-	0.815467	39.1137
Slco3a1	0.814174	-	-	0.814174	26.2194
Tmem98	0.814149	-	-	0.814149	5.80089
Unc5b	0.814036	-	-	0.814036	7.01646
Aplp1	0.813886	-	-	0.813886	51.5464
Otud7b	0.811818	-	-	0.811818	33.3436
Abca8a	0.811188	-	-	0.811188	15.7563
Rcbtb1	0.811155	-	-	0.811155	18.7106
Srcin1	0.811075	-	-	0.811075	18.6336
Haglr	0.810817	-	-	0.810817	2.49269
Elavl3	0.810744	-	-	0.810744	27.2811
Trim2	0.809874	-	-	0.809874	44.1606
Neat1	0.808676	-	-	0.808676	78.0274
Adam19	0.807713	-	-	0.807713	9.77073
Gm11437	0.805437	-	-	0.805437	6.89337
Carns1	0.805304	-	-	0.805304	9.58609
Atp8b1	0.805149	-	-	0.805149	8.83213
Cdc37l1	0.803832	-	-	0.803832	27.1119
Sox10	0.803526	-	-	0.803526	20.7724
Dapk2	0.80305	-	-	0.80305	4.00062
Gm28875	0.802063	-	-	0.802063	2.98507
Depdc7	0.802044	-	-	0.802044	3.56978
Fbxw15	0.801224	-	-	0.801224	1.04631
Ctnna3	0.801097	-	-	0.801097	68.5798
Kcna6	0.80084	-	-	0.80084	9.55532
Fam222a	0.800815	-	-	0.800815	5.2008
Osbp2	0.800645	-	-	0.800645	5.69318
Lpgat1	0.799651	-	-	0.799651	23.0651
Gnao1	0.798574	-	-	0.798574	39.8061
Cntn3	0.798178	-	-	0.798178	17.1257
1500015L24Rik	0.796939	-	-	0.796939	1.29251
St6galnac3	0.794623	-	-	0.794623	72.3804
Tmem178b	0.794269	-	-	0.794269	56.8549
Trim36	0.792495	-	-	0.792495	5.24696
Dnm3	0.792157	-	-	0.792157	72.9189
Mast4	0.790805	-	-	0.790805	83.8129
1700111E14Rik	0.789745	-	-	0.789745	5.18541
Gm16212	0.789199	-	-	0.789199	0.861671
Padi2	0.786888	-	-	0.786888	9.72457
Gm9945	0.786572	-	-	0.786572	2.00031
Serpinb1a	0.786085	-	-	0.786085	5.18541
Cpox	0.785737	-	-	0.785737	10.9555
Adap1	0.784675	-	-	0.784675	10.3401
Rtn4	0.78404	-	-	0.78404	57.7935
Gipr	0.783971	-	-	0.783971	2.70811
Gm20619	0.783949	-	-	0.783949	1.5387
Abca2	0.7838	-	-	0.7838	21.4187
Hid1	0.783287	-	-	0.783287	8.95522
Smad7	0.783162	-	-	0.783162	10.14
Josd2	0.783099	-	-	0.783099	22.8189
Nbas	0.779553	-	-	0.779553	24.8192
Ank3	0.779121	-	-	0.779121	64.2407
Dusp15	0.77861	-	-	0.77861	11.2325
Mboat1	0.778578	-	-	0.778578	10.4478
Agap1	0.777135	-	-	0.777135	49.0845
Fbxo32	0.77699	-	-	0.77699	6.46253
Mal	0.776652	-	-	0.776652	16.7872
Frmd4b	0.773596	-	-	0.773596	46.1148
Larp6	0.772914	-	-	0.772914	4.69303
Prkcz	0.7726	-	-	0.7726	19.603
Cdk19	0.771219	-	-	0.771219	52.7774
Slc45a3	0.77081	-	-	0.77081	1.13864
Nfasc	0.770064	-	-	0.770064	36.3133
Inf2	0.7696	-	-	0.7696	13.8021
Bin1	0.769465	-	-	0.769465	33.4359
Dpy19l1	0.769079	-	-	0.769079	11.6172
Dbndd2	0.768377	-	-	0.768377	8.89368
RP23-114E15.17	0.768196	-	-	0.768196	2.70811
Phlpp1	0.766449	-	-	0.766449	75.6116
Agpat4	0.766355	-	-	0.766355	20.0954
Sorcs1	0.766126	-	-	0.766126	47.5612
Mki67	0.766017	-	-	0.766017	2.29266
Zdhhc20	0.765804	-	-	0.765804	38.1136
Plekhg3	0.765493	-	-	0.765493	11.2017
Snx30	0.764896	-	-	0.764896	13.1097
Fnbp1	0.763729	-	-	0.763729	65.2254
Tmem88b	0.763056	-	-	0.763056	5.00077
9330111N05Rik	0.761455	-	-	0.761455	8.92445
Pcyt1b	0.760916	-	-	0.760916	13.5713
Smco3	0.759574	-	-	0.759574	2.4773
Gm26516	0.757332	-	-	0.757332	1.16941
Prickle2	0.756722	-	-	0.756722	64.1945
Tulp4	0.756642	-	-	0.756642	44.3453
Mapre2	0.75645	-	-	0.75645	27.1888
Tmcc2	0.756413	-	-	0.756413	10.7863
Cd52	0.756012	-	-	0.756012	5.78551
Gabrr2	0.755919	-	-	0.755919	1.93876
Srpk3	0.755877	-	-	0.755877	4.493
Piga	0.755227	-	-	0.755227	3.72365
Sept7	0.753855	-	-	0.753855	42.0834
Ppp1cc	0.752985	-	-	0.752985	14.9869
Tmem117	0.752014	-	-	0.752014	26.281
Kcnq3	0.750568	-	-	0.750568	54.593
Cnp	0.749711	-	-	0.749711	18.649
1700063D05Rik	0.749285	-	-	0.749285	1.78489
Spns2	0.747274	-	-	0.747274	6.86259
Galnt6os	0.747051	-	-	0.747051	0.553931
Thtpa	0.746933	-	-	0.746933	13.279
Nkain2	0.746681	-	-	0.746681	99.1537
9530059O14Rik	0.746294	-	-	0.746294	11.294
Gpr37	0.745339	-	-	0.745339	9.75535
Epb41l3	0.745204	-	-	0.745204	31.1125
Gatm	0.744598	-	-	0.744598	43.0374
Pdlim1	0.744399	-	-	0.744399	3.26204
Trpv3	0.744001	-	-	0.744001	0.723188
Tmem132d	0.743246	-	-	0.743246	26.6964
Mast3	0.742238	-	-	0.742238	4.26219
Pcsk6	0.741862	-	-	0.741862	8.60132
Klhl40	0.740003	-	-	0.740003	1.67718
Gm13293	0.738667	-	-	0.738667	1.44638
Slc25a27	0.738236	-	-	0.738236	15.0177
Adssl1	0.73766	-	-	0.73766	3.70826
Art3	0.737083	-	-	0.737083	6.75489
Abcg1	0.736461	-	-	0.736461	7.00108
Btc	0.736162	-	-	0.736162	1.20018
Gm42500	0.734052	-	-	0.734052	0.646253
Jam3	0.733469	-	-	0.733469	18.2182
Prkag3	0.733332	-	-	0.733332	0.769349
Vmp1	0.733243	-	-	0.733243	50.4539
Micall1	0.732411	-	-	0.732411	11.0171
Gm16233	0.73121	-	-	0.73121	1.03093
Gm15440	0.730743	-	-	0.730743	4.20065
Ube2d1	0.730121	-	-	0.730121	12.325
Unc5c	0.73011	-	-	0.73011	59.9015
6030407O03Rik	0.729233	-	-	0.729233	3.33898
Gm42745	0.728325	-	-	0.728325	0.753962
Tyro3	0.727675	-	-	0.727675	5.29312
Inpp5f	0.727545	-	-	0.727545	17.2334
Trim35	0.72653	-	-	0.72653	20.08
Gm6994	0.72604	-	-	0.72604	1.96953
Cercam	0.725145	-	-	0.725145	4.00062
Efcab14	0.723913	-	-	0.723913	17.3873
Ralgps1	0.722602	-	-	0.722602	22.8958
Plekhg1	0.722521	-	-	0.722521	41.5449
Otud7a	0.72227	-	-	0.72227	34.9131
Cryab	0.721372	-	-	0.721372	16.4179
Zeb2	0.719119	-	-	0.719119	79.243
RP24-294M17.5	0.719115	-	-	0.719115	0.476996
Cyth1	0.717109	-	-	0.717109	15.8024
Fgd3	0.715519	-	-	0.715519	4.95461
Rftn1	0.709611	-	-	0.709611	14.0483
Reps2	0.709011	-	-	0.709011	10.7401
Pla2g16	0.708887	-	-	0.708887	9.03216
2810429I04Rik	0.708725	-	-	0.708725	1.86182
Slc13a1	0.70868	-	-	0.70868	3.13894
Pgbd5	0.708319	-	-	0.708319	4.98538
Rasgrp3	0.707594	-	-	0.707594	19.6646
Frmd8	0.707373	-	-	0.707373	8.6321
Grb14	0.706817	-	-	0.706817	19.8338
Gm38304	0.706566	-	-	0.706566	19.6953
Hs3st1	0.706244	-	-	0.706244	4.52377
Tbc1d5	0.70606	-	-	0.70606	51.6233
March1	0.705965	-	-	0.705965	55.4701
Gm21680	0.70569	-	-	0.70569	0.30774
Qdpr	0.705124	-	-	0.705124	10.9863
6530409C15Rik	0.705003	-	-	0.705003	2.81582
Vldlr	0.704907	-	-	0.704907	8.24742
Sspo	0.704878	-	-	0.704878	0.984767
Fam102a	0.704794	-	-	0.704794	6.37021
Sec11c	0.703403	-	-	0.703403	18.0489
Adamtsl1	0.702602	-	-	0.702602	21.3264
Sccpdh	0.701148	-	-	0.701148	9.5707
Cmtm5	0.70034	-	-	0.70034	12.1711
Apod	0.700125	-	-	0.700125	42.4681
Arrdc3	0.699629	-	-	0.699629	7.77043
Erbb2ip	0.699211	-	-	0.699211	32.0819
Cdc42ep2	0.698528	-	-	0.698528	2.7235
Tmem125	0.698489	-	-	0.698489	1.5387
Dixdc1	0.697873	-	-	0.697873	15.0177
Lgi3	0.697285	-	-	0.697285	11.2325
Lrrtm3	0.697053	-	-	0.697053	43.2836
Acaca	0.696991	-	-	0.696991	36.9441
Gsn	0.696819	-	-	0.696819	15.1254
B3galt5	0.696345	-	-	0.696345	6.21634
Rab40c	0.695816	-	-	0.695816	20.357
Gpr62	0.695611	-	-	0.695611	1.23096
Tbcd	0.695243	-	-	0.695243	16.2487
Usp54	0.694878	-	-	0.694878	18.9568
Itgb4	0.692364	-	-	0.692364	5.78551
Gm12828	0.69187	-	-	0.69187	1.4156
Fbl	0.691105	-	-	0.691105	9.86306
Ubash3b	0.691024	-	-	0.691024	20.3262
Ccp110	0.689533	-	-	0.689533	7.97046
Sass6	0.689396	-	-	0.689396	4.56993
Vps8	0.688495	-	-	0.688495	18.726
Gm30097	0.68794	-	-	0.68794	0.538544
Gm4279	0.687525	-	-	0.687525	0.461609
Phactr1	0.687024	-	-	0.687024	40.4216
Kif13a	0.685882	-	-	0.685882	27.3427
Rab31	0.685247	-	-	0.685247	30.8201
Ptprd	0.684667	-	-	0.684667	93.6144
Fam13c	0.684214	-	-	0.684214	14.2022
4933428G20Rik	0.684101	-	-	0.684101	0.861671
Fscn1	0.682952	-	-	0.682952	7.55501
Mbnl2	0.68294	-	-	0.68294	52.762
Fhdc1	0.682908	-	-	0.682908	1.92337
Btbd8	0.682434	-	-	0.682434	9.73996
Ttyh2	0.682227	-	-	0.682227	25.9886
Pakap	0.681423	-	-	0.681423	3.47746
Inpp5j	0.680294	-	-	0.680294	3.0774
B230344G16Rik	0.68021	-	-	0.68021	0.384675
Cdc42bpa	0.679271	-	-	0.679271	45.13
Slc34a3	0.67894	-	-	0.67894	0.369288
Ptgds	0.678383	-	-	0.678383	49.8077
Gtsf1	0.678096	-	-	0.678096	3.21588
Gab1	0.677732	-	-	0.677732	34.3284
Atg4c	0.677578	-	-	0.677578	9.87844
Nkx2-9	0.676925	-	-	0.676925	0.50777
Ptpn11	0.676721	-	-	0.676721	13.0789
Nmral1	0.675992	-	-	0.675992	3.27743
Wscd1	0.67534	-	-	0.67534	12.4788
Atp11a	0.674107	-	-	0.674107	13.8175
Ly6g6f	0.67407	-	-	0.67407	0.707801
Pvt1	0.673852	-	-	0.673852	14.7253
Grm7	0.672206	-	-	0.672206	50.6386
Ttll5	0.672181	-	-	0.672181	23.3728
Arhgef2	0.671768	-	-	0.671768	14.8331
Gas7	0.671061	-	-	0.671061	15.1254
Ablim2	0.670747	-	-	0.670747	13.679
Gm27200	0.669524	-	-	0.669524	0.50777
Mapt	0.668532	-	-	0.668532	59.4399
Shisa4	0.668087	-	-	0.668087	15.864
Slc7a15	0.667918	-	-	0.667918	0.877058
Galnt7	0.665379	-	-	0.665379	10.3093
Bcas1os2	0.66531	-	-	0.66531	1.95415
Gm10687	0.665031	-	-	0.665031	0.938606
Osbpl1a	0.662821	-	-	0.662821	19.4184
Sh3kbp1	0.662465	-	-	0.662465	23.0035
Ddr1	0.661482	-	-	0.661482	23.0651
E330009J07Rik	0.660782	-	-	0.660782	6.46253
Gm43832	0.660745	-	-	0.660745	0.953993
Zdhhc9	0.660187	-	-	0.660187	6.32405
Gm26936	0.660022	-	-	0.660022	2.13879
Cdh8	0.659462	-	-	0.659462	11.6479
Cd300lf	0.658323	-	-	0.658323	0.538544
Slc16a7	0.657998	-	-	0.657998	5.80089
Cers2	0.657797	-	-	0.657797	9.66303
Lzts2	0.65676	-	-	0.65676	11.6479
Kif21a	0.655574	-	-	0.655574	30.4047
Rnf13	0.654981	-	-	0.654981	24.2037
4930558K02Rik	0.654686	-	-	0.654686	1.38483
Tmem144	0.654142	-	-	0.654142	3.69288
Gm16126	0.652805	-	-	0.652805	1.70796
Cipc	0.651448	-	-	0.651448	18.726
Fign	0.651387	-	-	0.651387	18.2951
Plekha1	0.649975	-	-	0.649975	14.5869
Fam134b	0.648837	-	-	0.648837	15.4178
Slc46a2	0.648087	-	-	0.648087	0.830897
Wipi1	0.647598	-	-	0.647598	7.75504
Dopey2	0.647284	-	-	0.647284	10.7863
Shroom1	0.645838	-	-	0.645838	3.83136
Zfp239	0.645042	-	-	0.645042	6.43176
Cep97	0.64463	-	-	0.64463	10.4785
Elmo1	0.644264	-	-	0.644264	51.0386
Daam1	0.644128	-	-	0.644128	23.7729
Faah	0.643373	-	-	0.643373	4.63148
Klf13	0.642901	-	-	0.642901	15.6793
Txndc16	0.642689	-	-	0.642689	13.9252
Gm28782	0.64156	-	-	0.64156	0.292353
Arc	0.641188	-	-	0.641188	0.66164
Rps6ka5	0.639001	-	-	0.639001	22.8343
Abhd17b	0.637353	-	-	0.637353	17.5719
Rhbdl2	0.635956	-	-	0.635956	3.03124
Amd1	0.634689	-	-	0.634689	14.3714
Gm30173	0.634672	-	-	0.634672	0.476996
Enpp4	0.631912	-	-	0.631912	5.2008
Sort1	0.630303	-	-	0.630303	16.8487
Fam171b	0.630174	-	-	0.630174	14.4484
Sik3	0.630012	-	-	0.630012	51.0078
Tppp	0.629626	-	-	0.629626	5.40083
Bcat1	0.629388	-	-	0.629388	7.69349
Serpind1	0.629295	-	-	0.629295	0.738575
Nipa1	0.629011	-	-	0.629011	6.95492
Mfsd6	0.628582	-	-	0.628582	9.26296
Gm44188	0.627937	-	-	0.627937	0.861671
Gm16068	0.62482	-	-	0.62482	0.553931
Slc48a1	0.62366	-	-	0.62366	10.7555
Nkx2-2os	0.623292	-	-	0.623292	8.89368
Hipk2	0.623038	-	-	0.623038	40.5909
Limch1	0.623016	-	-	0.623016	43.2682
Ankrd28	0.622441	-	-	0.622441	29.9123
Igsf11	0.621846	-	-	0.621846	33.4667
Tdrd6	0.620708	-	-	0.620708	0.446222
Atp9a	0.620377	-	-	0.620377	18.3567
Plin3	0.619903	-	-	0.619903	4.67764
Rnf122	0.616963	-	-	0.616963	2.96969
Prrg1	0.616107	-	-	0.616107	12.3557
Ptprk	0.615694	-	-	0.615694	44.0991
Gm15478	0.61429	-	-	0.61429	29.2814
Dock5	0.613327	-	-	0.613327	17.1411
Gm42956	0.612642	-	-	0.612642	0.384675
Gna12	0.612419	-	-	0.612419	15.187
Lrrc1	0.611159	-	-	0.611159	7.6781
Psat1	0.610795	-	-	0.610795	4.89306
Il17rb	0.61011	-	-	0.61011	0.723188
Desi1	0.608984	-	-	0.608984	9.97076
Fgfr2	0.608531	-	-	0.608531	54.4084
Zfp101	0.608385	-	-	0.608385	6.41637
Dusp16	0.607272	-	-	0.607272	9.17064
Col2a1	0.605815	-	-	0.605815	0.538544
Map4k5	0.604908	-	-	0.604908	15.4485
Pvrl1	0.604859	-	-	0.604859	4.29297
Gm11210	0.603816	-	-	0.603816	0.615479
Dock9	0.603793	-	-	0.603793	36.5133
Myh6	0.603496	-	-	0.603496	2.89275
Spg20	0.60281	-	-	0.60281	5.49315
Sema6a	0.602406	-	-	0.602406	21.3417
Rcan2	0.60229	-	-	0.60229	15.6178
Tjap1	0.600873	-	-	0.600873	10.1246
Tmod2	0.600743	-	-	0.600743	19.2799
Exoc6b	0.600466	-	-	0.600466	41.7449
Rnf141	0.600343	-	-	0.600343	8.06278
Iars	0.600241	-	-	0.600241	8.24742
Ippk	0.600227	-	-	0.600227	4.493
Trmt13	0.600188	-	-	0.600188	9.30912
App	0.599867	-	-	0.599867	63.8868
Eml2	0.599514	-	-	0.599514	15.3254
Gm29325	0.599382	-	-	0.599382	0.846284
Clasrp	0.598504	-	-	0.598504	14.2176
Tpst1	0.59746	-	-	0.59746	6.87798
Car14	0.597143	-	-	0.597143	9.67841
Gm13919	0.596834	-	-	0.596834	11.0632
A430106G13Rik	0.596291	-	-	0.596291	3.38514
Ankib1	0.594208	-	-	0.594208	15.8178
A930006I01Rik	0.593611	-	-	0.593611	0.353901
Pkp4	0.593503	-	-	0.593503	31.3587
Mpzl1	0.592681	-	-	0.592681	20.6955
Ndst4	0.592634	-	-	0.592634	3.36975
Gm15912	0.591522	-	-	0.591522	0.96938
Ell2	0.590877	-	-	0.590877	7.15495
Plin4	0.590741	-	-	0.590741	0.646253
Bcl2l1	0.589036	-	-	0.589036	22.5573
Cdkl5	0.588287	-	-	0.588287	9.47838
Gm11149	0.58726	-	-	0.58726	3.69288
Hmox2	0.584461	-	-	0.584461	9.75535
Pllp	0.583953	-	-	0.583953	9.38606
Mtmr2	0.583599	-	-	0.583599	6.27789
Xrcc3	0.582949	-	-	0.582949	1.44638
Trim13	0.582404	-	-	0.582404	1.8926
Apba1	0.5815	-	-	0.5815	22.0495
Ankub1	0.581353	-	-	0.581353	11.6172
Cdh20	0.581057	-	-	0.581057	61.9634
March8	0.580963	-	-	0.580963	9.84767
Tgfb3	0.577638	-	-	0.577638	2.29266
Dip2b	0.577633	-	-	0.577633	37.2827
Kcnab1	0.577173	-	-	0.577173	18.3259
Plxdc2	0.576661	-	-	0.576661	54.5469
Ccdc187	0.575668	-	-	0.575668	0.50777
Stxbp6	0.574597	-	-	0.574597	30.4201
Dlg2	0.573742	-	-	0.573742	69.2722
Pip4k2a	0.573657	-	-	0.573657	24.3422
Gm42893	0.57286	-	-	0.57286	1.10786
Ppp2r2a	0.572042	-	-	0.572042	23.2497
Scamp5	0.570715	-	-	0.570715	11.6172
Bpgm	0.569821	-	-	0.569821	4.90845
Pcdh9	0.569365	-	-	0.569365	99.4922
Gm12689	0.569145	-	-	0.569145	1.23096
Lrrc28	0.565672	-	-	0.565672	7.18572
A930017K11Rik	0.565333	-	-	0.565333	0.430836
Stxbp3	0.565173	-	-	0.565173	8.93984
Gm20404	0.564711	-	-	0.564711	2.92353
Dcps	0.562741	-	-	0.562741	6.09325
Fcor	0.562366	-	-	0.562366	1.21557
Ppp2r2c	0.562055	-	-	0.562055	7.69349
Sh3gl3	0.561179	-	-	0.561179	4.09294
4932435O22Rik	0.560883	-	-	0.560883	0.723188
Rybp	0.558924	-	-	0.558924	9.12448
Zbtb38	0.558909	-	-	0.558909	13.5098
Plekhh2	0.558227	-	-	0.558227	10.4324
Tmcc1	0.556374	-	-	0.556374	46.1917
Pcbp4	0.556277	-	-	0.556277	11.0017
Ptp4a1	0.55551	-	-	0.55551	3.0774
Map6	0.555199	-	-	0.555199	7.78581
Ywhaq	0.554547	-	-	0.554547	23.5575
Kat2b	0.553581	-	-	0.553581	16.1563
Gm43848	0.553138	-	-	0.553138	2.44653
Cdh19	0.552689	-	-	0.552689	25.0346
1700024B05Rik	0.552675	-	-	0.552675	3.84675
2900055J20Rik	0.551456	-	-	0.551456	2.15418
Parm1	0.551198	-	-	0.551198	8.53978
Dnajb2	0.550075	-	-	0.550075	9.35529
Syt11	0.547058	-	-	0.547058	33.0205
Lap3	0.546998	-	-	0.546998	5.23157
Slc9b2	0.546787	-	-	0.546787	2.44653
Gm26785	0.546779	-	-	0.546779	4.55455
Glp2r	0.546729	-	-	0.546729	11.1556
Adamts2	0.545988	-	-	0.545988	5.58547
Efhd1	0.545856	-	-	0.545856	4.66226
Erich6	0.544587	-	-	0.544587	0.707801
Atp8a1	0.544583	-	-	0.544583	42.0988
Ncam2	0.544121	-	-	0.544121	66.8411
Rnf112	0.543031	-	-	0.543031	5.04693
Specc1	0.542478	-	-	0.542478	23.1266
Sema4d	0.540998	-	-	0.540998	8.72442
Gm7580	0.54023	-	-	0.54023	0.553931
4732471J01Rik	0.539966	-	-	0.539966	15.0485
Cttnbp2	0.538547	-	-	0.538547	24.373
Tfeb	0.538295	-	-	0.538295	7.46269
Gng8	0.537589	-	-	0.537589	0.446222
Cd82	0.536942	-	-	0.536942	4.43145
4933427G17Rik	0.536895	-	-	0.536895	1.55409
Atrn	0.535834	-	-	0.535834	21.8649
Amph	0.5358	-	-	0.5358	21.4802
Csrp1	0.535601	-	-	0.535601	19.603
Ppip5k2	0.534971	-	-	0.534971	6.10863
Hdac11	0.534963	-	-	0.534963	7.01646
Tprn	0.534098	-	-	0.534098	1.52331
Prkcq	0.534018	-	-	0.534018	8.77058
BC024139	0.532972	-	-	0.532972	0.800123
Plod1	0.532964	-	-	0.532964	6.55485
Rap1a	0.531916	-	-	0.531916	20.8647
Mov10l1	0.531827	-	-	0.531827	0.707801
Rtkn	0.53151	-	-	0.53151	10.6632
Itsn2	0.531458	-	-	0.531458	22.4034
Kctd16	0.531331	-	-	0.531331	10.4324
Fbxo7	0.530719	-	-	0.530719	7.07801
Tsc1	0.530161	-	-	0.530161	12.6481
Ipo13	0.529732	-	-	0.529732	5.00077
Gm4211	0.528875	-	-	0.528875	0.769349
Ankrd13a	0.527757	-	-	0.527757	8.032
Gm15594	0.527155	-	-	0.527155	0.461609
St8sia3	0.526228	-	-	0.526228	3.95445
Cerk	0.526173	-	-	0.526173	14.0022
Gm12092	0.525545	-	-	0.525545	0.923219
Nxpe3	0.52543	-	-	0.52543	6.30866
Myh14	0.523251	-	-	0.523251	12.3711
Abca8b	0.522779	-	-	0.522779	6.70872
RP23-291B1.2	0.521535	-	-	0.521535	1.26173
Wrap53	0.520742	-	-	0.520742	2.92353
Entpd5	0.520674	-	-	0.520674	4.90845
Magi2	0.520519	-	-	0.520519	97.4304
Tm7sf3	0.518518	-	-	0.518518	5.6778
Npat	0.518409	-	-	0.518409	6.20095
Masp1	0.516884	-	-	0.516884	3.90829
Megf10	0.516345	-	-	0.516345	17.3104
Csf1	0.515754	-	-	0.515754	4.21603
Lig3	0.515577	-	-	0.515577	3.58517
Far1os	0.514857	-	-	0.514857	1.7695
Fads6	0.514571	-	-	0.514571	3.64671
St6gal1	0.513725	-	-	0.513725	29.2507
Snrpn	0.513166	-	-	0.513166	4.12371
Ceacam2	0.511068	-	-	0.511068	2.41576
Naaladl2	0.510271	-	-	0.510271	42.0526
Shcbp1l	0.510249	-	-	0.510249	1.27712
Lrp1b	0.510068	-	-	0.510068	93.9837
Bche	0.510063	-	-	0.510063	3.52362
Kazn	0.508128	-	-	0.508128	13.279
Sik2	0.507992	-	-	0.507992	21.2802
Gm26694	0.507974	-	-	0.507974	34.6823
St3gal3	0.507207	-	-	0.507207	16.2487
D1Ertd622e	0.506942	-	-	0.506942	5.70857
Clasp2	0.506138	-	-	0.506138	49.5153
Ppp2r3a	0.504558	-	-	0.504558	27.7273
Endod1	0.503843	-	-	0.503843	8.90906
Gpm6b	0.503218	-	-	0.503218	56.3779
Slc8a1	0.502343	-	-	0.502343	45.8378
Itch	0.502113	-	-	0.502113	30.1739
Cdc42ep1	0.500722	-	-	0.500722	5.10848
Arrdc2	0.500612	-	-	0.500612	1.61563
Dcaf17	0.500577	-	-	0.500577	8.44745
Aig1	0.500448	-	-	0.500448	27.9428
Dusp26	0.500184	-	-	0.500184	5.6778
Acot7	0.500116	-	-	0.500116	16.2179
Gm9972	0.499597	-	-	0.499597	0.230805
Abca6	0.498728	-	-	0.498728	2.61579
Wdr91	0.497432	-	-	0.497432	4.00062
Stard3	0.497392	-	-	0.497392	5.27774
Mta3	0.497309	-	-	0.497309	10.4016
Fam131b	0.49647	-	-	0.49647	1.50792
Irs2	0.496171	-	-	0.496171	4.64687
Wdr20	0.494972	-	-	0.494972	10.8632
Mcam	0.494088	-	-	0.494088	4.7238
Chsy3	0.493982	-	-	0.493982	7.30882
Fbxo21	0.493973	-	-	0.493973	6.44715
Zfp553	0.49267	-	-	0.49267	2.70811
Polr3e	0.492549	-	-	0.492549	5.30851
Gdpd5	0.491532	-	-	0.491532	4.76996
Pcyt2	0.490691	-	-	0.490691	25.7578
Mink1	0.490571	-	-	0.490571	10.5093
Trim3	0.489713	-	-	0.489713	6.67795
Rinl	0.489561	-	-	0.489561	1.56947
B3gnt9	0.489449	-	-	0.489449	0.677027
Picalm	0.48876	-	-	0.48876	18.3105
Gss	0.488509	-	-	0.488509	3.04662
Nacad	0.488489	-	-	0.488489	2.06186
Cpd	0.488017	-	-	0.488017	13.0789
Sv2a	0.486558	-	-	0.486558	11.5095
Fam98a	0.486188	-	-	0.486188	5.44699
Ldlrap1	0.484267	-	-	0.484267	1.70796
Dlg1	0.483106	-	-	0.483106	29.543
P3h4	0.482888	-	-	0.482888	2.52347
Zfp638	0.478369	-	-	0.478369	26.8041
Grik2	0.476936	-	-	0.476936	45.4685
Rnf43	0.476048	-	-	0.476048	4.1391
Tesk2	0.475021	-	-	0.475021	13.0328
Fez1	0.472965	-	-	0.472965	14.4176
Acsl1	0.470942	-	-	0.470942	7.40114
Kif1b	0.47088	-	-	0.47088	56.3164
Mlkl	0.470039	-	-	0.470039	0.538544
Napepld	0.469647	-	-	0.469647	3.01585
Arntl2	0.469586	-	-	0.469586	2.38498
Ssh2	0.469513	-	-	0.469513	45.5762
Jak2	0.469438	-	-	0.469438	9.86306
Secisbp2l	0.464679	-	-	0.464679	7.4473
Coro1c	0.463334	-	-	0.463334	7.87814
Gm29502	0.463137	-	-	0.463137	1.66179
Snx15	0.461979	-	-	0.461979	6.15479
Klf8	0.460611	-	-	0.460611	3.67749
Qk	0.460559	-	-	0.460559	79.4584
9530034E10Rik	0.460117	-	-	0.460117	1.95415
Sgk3	0.459419	-	-	0.459419	7.83197
Tex22	0.458431	-	-	0.458431	1.93876
Ppp1r21	0.458	-	-	0.458	8.1551
1700025G04Rik	0.456327	-	-	0.456327	12.5404
Ispd	0.45628	-	-	0.45628	12.6327
Slc8a3	0.455191	-	-	0.455191	6.55485
Fam234a	0.453943	-	-	0.453943	13.0482
Foxn3	0.453424	-	-	0.453424	31.728
Fan1	0.453184	-	-	0.453184	4.95461
Nde1	0.452836	-	-	0.452836	4.18526
Kif6	0.451729	-	-	0.451729	14.4792
Fam177a	0.45106	-	-	0.45106	8.26281
Ccdc163	0.450357	-	-	0.450357	2.2465
Fmnl2	0.449958	-	-	0.449958	53.3159
Ncam1	0.44891	-	-	0.44891	67.1026
Trim7	0.448866	-	-	0.448866	2.52347
Aven	0.446935	-	-	0.446935	5.04693
S100b	0.446717	-	-	0.446717	17.7874
Nbea	0.446533	-	-	0.446533	43.499
Myo18a	0.445687	-	-	0.445687	19.5569
Clgn	0.444294	-	-	0.444294	2.00031
Ift43	0.443832	-	-	0.443832	9.6938
Asxl3	0.443185	-	-	0.443185	10.1708
Ptk2	0.442118	-	-	0.442118	36.1286
Mpp5	0.441809	-	-	0.441809	14.3561
Gm19705	0.440305	-	-	0.440305	2.4773
Cldn34c1	0.439937	-	-	0.439937	7.4473
Rasa3	0.439928	-	-	0.439928	10.4939
Gpt	0.439682	-	-	0.439682	1.64641
Wdr95	0.439232	-	-	0.439232	1.13864
Sept1	0.439021	-	-	0.439021	4.44684
Zbtb16	0.438906	-	-	0.438906	11.2171
Ldlrad3	0.438738	-	-	0.438738	14.2945
Zfp365	0.438393	-	-	0.438393	1.95415
Abl1	0.438308	-	-	0.438308	12.1557
Dcc	0.438163	-	-	0.438163	41.2679
Sh3d19	0.437481	-	-	0.437481	22.0188
Gprc5b	0.437388	-	-	0.437388	15.4024
Kif3c	0.43697	-	-	0.43697	10.7401
Enpp3	0.435495	-	-	0.435495	0.584705
Cab39l	0.435139	-	-	0.435139	16.2948
Lrrn1	0.4346	-	-	0.4346	7.63194
Brca1	0.434071	-	-	0.434071	1.55409
Arhgef28	0.432883	-	-	0.432883	19.3414
Apbb1	0.431151	-	-	0.431151	7.75504
Fam107b	0.430965	-	-	0.430965	3.92368
Tbc1d22b	0.430818	-	-	0.430818	6.46253
Ndrg1	0.430639	-	-	0.430639	8.55516
Rassf2	0.430141	-	-	0.430141	11.7249
Stmn1	0.42917	-	-	0.42917	20.4493
Xkr4	0.428338	-	-	0.428338	26.4656
Thsd4	0.428141	-	-	0.428141	10.5401
Gm17090	0.42809	-	-	0.42809	1.09248
Zfp532	0.42796	-	-	0.42796	23.7883
Mettl7a1	0.427805	-	-	0.427805	8.43207
Sbf1	0.426945	-	-	0.426945	5.2008
Slc38a2	0.426857	-	-	0.426857	14.9408
Npc1	0.426855	-	-	0.426855	8.17049
Neo1	0.426341	-	-	0.426341	23.8037
Tmtc2	0.425942	-	-	0.425942	46.4687
Ube2e2	0.423904	-	-	0.423904	49.2691
Zfp488	0.423799	-	-	0.423799	0.600092
Cdc42se2	0.422856	-	-	0.422856	11.3402
Dync1li2	0.421514	-	-	0.421514	14.0483
Tbc1d10b	0.420824	-	-	0.420824	4.06216
RP23-344G21.5	0.42043	-	-	0.42043	0.66164
Ints4	0.42026	-	-	0.42026	6.35482
Clip3	0.417359	-	-	0.417359	5.0777
Taldo1	0.416841	-	-	0.416841	9.23219
Asah2	0.416806	-	-	0.416806	3.52362
Wnk1	0.416509	-	-	0.416509	37.5442
Fbxl5	0.416408	-	-	0.416408	8.35513
Prickle1	0.416068	-	-	0.416068	21.3417
Urm1	0.414415	-	-	0.414415	4.86229
Lrrc8d	0.41346	-	-	0.41346	12.5404
Trub2	0.413371	-	-	0.413371	5.64702
Serinc5	0.412757	-	-	0.412757	9.38606
Sh3bp5	0.411417	-	-	0.411417	5.09309
Prkd3	0.411153	-	-	0.411153	6.9703
Pard3	0.409834	-	-	0.409834	32.8204
Mapk8ip1	0.407568	-	-	0.407568	7.38575
Cxcl17	0.407447	-	-	0.407447	2.49269
Ank	0.40726	-	-	0.40726	22.1265
Fbn2	0.403948	-	-	0.403948	4.40068
Mtus1	0.403616	-	-	0.403616	13.0328
Usp30	0.40349	-	-	0.40349	2.64656
Efemp1	0.402273	-	-	0.402273	5.46238
Gpatch4	0.402143	-	-	0.402143	2.13879
Baz2b	0.401683	-	-	0.401683	40.5293
Sept8	0.400538	-	-	0.400538	9.3399
Ctnna2	0.400209	-	-	0.400209	69.7492
Fth1	0.40019	-	-	0.40019	50.5924
Lpar1	0.399681	-	-	0.399681	14.0329
Fryl	0.399118	-	-	0.399118	23.2959
Efcab5	0.398527	-	-	0.398527	1.24635
Pde4dip	0.398337	-	-	0.398337	17.6335
Atp1b3	0.397133	-	-	0.397133	10.8017
Fam126a	0.395503	-	-	0.395503	9.26296
Wipf1	0.395088	-	-	0.395088	20.8494
5730508B09Rik	0.394436	-	-	0.394436	0.846284
Hhatl	0.393864	-	-	0.393864	3.40052
Gstm7	0.393772	-	-	0.393772	2.01569
Pla2g4a	0.393701	-	-	0.393701	9.44761
Gm11250	0.393687	-	-	0.393687	1.60025
Mgat3	0.393083	-	-	0.393083	6.35482
Siah2	0.392909	-	-	0.392909	2.16956
Ints7	0.392897	-	-	0.392897	4.64687
Lta4h	0.392256	-	-	0.392256	3.90829
Snx1	0.390881	-	-	0.390881	15.0946
Jph4	0.390558	-	-	0.390558	3.03124
Spsb1	0.390203	-	-	0.390203	3.40052
Scly	0.387822	-	-	0.387822	4.98538
Ncald	0.386967	-	-	0.386967	18.0643
Slc4a2	0.3867	-	-	0.3867	5.53931
Zmynd8	0.386587	-	-	0.386587	25.1269
Tspan14	0.38651	-	-	0.38651	6.50869
Glrb	0.386011	-	-	0.386011	12.4019
Gm28375	0.382405	-	-	0.382405	7.93968
Add1	0.380659	-	-	0.380659	17.018
Dpysl2	0.380184	-	-	0.380184	29.0198
Slc9b1	0.380147	-	-	0.380147	0.369288
Gipc1	0.378564	-	-	0.378564	6.01631
Cdr2	0.377102	-	-	0.377102	1.44638
Kifc5b	0.37681	-	-	0.37681	1.27712
Sox8	0.376339	-	-	0.376339	11.8326
Bcas3os1	0.376044	-	-	0.376044	7.81659
Polrmt	0.375651	-	-	0.375651	3.67749
Cdip1	0.374331	-	-	0.374331	18.6336
Zfp273	0.372901	-	-	0.372901	2.16956
Anks1b	0.372503	-	-	0.372503	43.6067
Dnajc24	0.372045	-	-	0.372045	9.01677
5330434G04Rik	0.371837	-	-	0.371837	13.3867
Pgap1	0.370169	-	-	0.370169	6.24711
Cyp39a1	0.369848	-	-	0.369848	1.8926
Sulf2	0.369781	-	-	0.369781	10.8478
Tanc1	0.369188	-	-	0.369188	15.0331
Bicd2	0.368967	-	-	0.368967	5.87783
Sytl5	0.368908	-	-	0.368908	1.01554
Clic4	0.368635	-	-	0.368635	14.0791
D8Ertd82e	0.366683	-	-	0.366683	8.18587
Map4	0.365868	-	-	0.365868	35.944
Adcy10	0.365365	-	-	0.365365	5.86244
Arfgef2	0.365314	-	-	0.365314	12.3865
Csmd3	0.364832	-	-	0.364832	62.1172
Elovl1	0.363426	-	-	0.363426	3.4313
Rs1	0.363284	-	-	0.363284	0.753962
Heatr3	0.362636	-	-	0.362636	5.78551
Cyp20a1	0.362204	-	-	0.362204	6.35482
Ick	0.360476	-	-	0.360476	9.17064
Gm11110	0.359269	-	-	0.359269	0.800123
Arhgap39	0.359077	-	-	0.359077	18.5413
Tex2	0.355155	-	-	0.355155	8.30897
Elf2	0.354659	-	-	0.354659	10.6632
2310069G16Rik	0.354013	-	-	0.354013	2.40037
Rab33b	0.352755	-	-	0.352755	3.24665
Lipa	0.352317	-	-	0.352317	4.12371
Tcf12	0.35164	-	-	0.35164	50.0539
Gnptab	0.351313	-	-	0.351313	4.90845
Gm36975	0.348898	-	-	0.348898	4.67764
Fktn	0.348195	-	-	0.348195	6.64718
D830044I16Rik	0.347261	-	-	0.347261	0.50777
Rhog	0.346767	-	-	0.346767	1.4156
Pogk	0.345459	-	-	0.345459	2.63117
Ticam1	0.345403	-	-	0.345403	2.3696
Gm29417	0.344762	-	-	0.344762	1.5387
Ctsk	0.344467	-	-	0.344467	0.846284
3110021N24Rik	0.344359	-	-	0.344359	7.50885
2700046A07Rik	0.343842	-	-	0.343842	0.430836
Acap2	0.343303	-	-	0.343303	21.4187
Fmn1	0.342901	-	-	0.342901	10.8017
Tgfa	0.342472	-	-	0.342472	7.50885
Prkacb	0.342016	-	-	0.342016	13.6636
Zfp771	0.34034	-	-	0.34034	5.24696
Fam134c	0.339657	-	-	0.339657	7.83197
Rapgef5	0.3384	-	-	0.3384	10.817
Tma16	0.336821	-	-	0.336821	2.06186
Tfdp2	0.334833	-	-	0.334833	10.0323
Nfix	0.334415	-	-	0.334415	16.4641
Gm43713	0.33402	-	-	0.33402	16.6949
Gm26843	0.333438	-	-	0.333438	2.70811
Mitf	0.333242	-	-	0.333242	18.5721
Fabp3-ps1	0.333204	-	-	0.333204	2.26189
Pex1	0.332541	-	-	0.332541	5.26235
Aldh1l2	0.332459	-	-	0.332459	1.04631
Robo1	0.33112	-	-	0.33112	24.9731
Nkx2-2	0.330923	-	-	0.330923	4.73919
Cxxc5	0.330233	-	-	0.330233	6.64718
Mtf1	0.329032	-	-	0.329032	4.61609
Arnt2	0.326045	-	-	0.326045	14.0791
Rnf130	0.325585	-	-	0.325585	14.1868
Tmem229a	0.325232	-	-	0.325232	2.86198
Map1a	0.323926	-	-	0.323926	6.37021
Dpyd	0.321602	-	-	0.321602	32.4511
Dock3	0.321415	-	-	0.321415	22.3111
Ccdc50	0.318441	-	-	0.318441	11.7864
Kctd4	0.317999	-	-	0.317999	3.49285
Slc5a11	0.316763	-	-	0.316763	1.78489
Camkmt	0.315989	-	-	0.315989	16.1102
Chmp7	0.315739	-	-	0.315739	4.8469
Arid4b	0.315592	-	-	0.315592	24.6961
E130308A19Rik	0.313783	-	-	0.313783	17.3104
Ipp	0.313457	-	-	0.313457	3.32359
Rab11fip4	0.313446	-	-	0.313446	5.87783
Epb41l4b	0.312736	-	-	0.312736	7.52423
Ermp1	0.312275	-	-	0.312275	3.36975
Dst	0.311884	-	-	0.311884	38.7444
Mvb12b	0.311842	-	-	0.311842	11.5556
Osbp	0.311344	-	-	0.311344	5.00077
Tjp2	0.309861	-	-	0.309861	10.9094
Hcn1	0.308508	-	-	0.308508	9.72457
Pde11a	0.308058	-	-	0.308058	1.38483
Bdkrb2	0.308014	-	-	0.308014	1.35405
Tenm2	0.307905	-	-	0.307905	38.9291
Ttbk1	0.307808	-	-	0.307808	2.32343
Trappc10	0.307554	-	-	0.307554	6.2625
Hmgcl	0.306397	-	-	0.306397	7.98584
Apbb2	0.306059	-	-	0.306059	29.0814
Dnajb12	0.305391	-	-	0.305391	3.52362
Dis3l2	0.305278	-	-	0.305278	20.5108
Bace1	0.305263	-	-	0.305263	4.70842
Tada2a	0.30482	-	-	0.30482	8.46284
Gltp	0.304277	-	-	0.304277	3.53901
Bcar1	0.302049	-	-	0.302049	5.09309
Glod4	0.301986	-	-	0.301986	5.95476
Cdh2	0.299997	-	-	0.299997	27.5889
Mtss1	0.298781	-	-	0.298781	13.5252
Scd2	0.298729	-	-	0.298729	33.559
Fsd1l	0.297737	-	-	0.297737	6.07786
Afap1l1	0.296592	-	-	0.296592	5.93938
Ank2	0.29578	-	-	0.29578	75.0423
Myo1e	0.295191	-	-	0.295191	12.4481
Rnf144a	0.294613	-	-	0.294613	9.61686
Cobll1	0.294467	-	-	0.294467	19.803
Usp48	0.294332	-	-	0.294332	7.3242
Far1	0.291987	-	-	0.291987	9.55532
Syne3	0.291985	-	-	0.291985	2.18495
Phc1	0.291749	-	-	0.291749	4.35452
Tada1	0.289858	-	-	0.289858	2.43114
Adam10	0.28918	-	-	0.28918	18.9568
Atl3	0.288849	-	-	0.288849	10.2939
Pik3r3	0.288072	-	-	0.288072	12.1249
Pmp22	0.287915	-	-	0.287915	4.70842
Stk39	0.287694	-	-	0.287694	14.2637
Ado	0.2869	-	-	0.2869	1.47715
Cdh10	0.286799	-	-	0.286799	37.2519
Zfp169	0.286176	-	-	0.286176	3.4313
Kif3a	0.284405	-	-	0.284405	8.986
Cacnb4	0.284021	-	-	0.284021	22.1265
Akap6	0.282526	-	-	0.282526	32.3281
Brsk2	0.282425	-	-	0.282425	1.86182
Hyal5	0.281093	-	-	0.281093	0.261579
Traf6	0.280152	-	-	0.280152	5.21619
Capn15	0.279948	-	-	0.279948	10.3554
5031439G07Rik	0.279431	-	-	0.279431	22.5727
Strn	0.278821	-	-	0.278821	6.21634
Pacsin1	0.278369	-	-	0.278369	8.84752
Acy1	0.277837	-	-	0.277837	1.33867
Zfp740	0.276824	-	-	0.276824	10.5401
Carhsp1	0.275731	-	-	0.275731	2.21573
Mpp2	0.274547	-	-	0.274547	2.87737
Hn1l	0.274406	-	-	0.274406	1.40022
Ctr9	0.274123	-	-	0.274123	5.84705
Gm26916	0.272529	-	-	0.272529	15.787
Phactr4	0.272453	-	-	0.272453	11.1863
Omg	0.270017	-	-	0.270017	4.493
Gm5916	0.268118	-	-	0.268118	0.430836
Fermt2	0.267598	-	-	0.267598	18.8952
Zfyve1	0.267282	-	-	0.267282	9.15525
Cenpp	0.2666	-	-	0.2666	7.64733
Degs1	0.266	-	-	0.266	6.46253
Pdk3	0.265743	-	-	0.265743	4.23142
Bicd1	0.265731	-	-	0.265731	19.8184
Tarsl2	0.265723	-	-	0.265723	2.00031
Bcas3	0.265319	-	-	0.265319	33.8052
Epn2	0.265282	-	-	0.265282	21.3725
Pxk	0.265024	-	-	0.265024	6.75489
Slc26a11	0.264122	-	-	0.264122	3.26204
Adcy5	0.263985	-	-	0.263985	5.09309
Bcorl1	0.263742	-	-	0.263742	3.09278
Uck2	0.262604	-	-	0.262604	1.72334
Fam168a	0.260708	-	-	0.260708	22.9574
Pxylp1	0.260477	-	-	0.260477	1.5387
Gm13963	0.260317	-	-	0.260317	1.44638
Snca	0.260185	-	-	0.260185	10.9401
Optn	0.259509	-	-	0.259509	3.16972
Syt9	0.259487	-	-	0.259487	2.75427
Prkca	0.258688	-	-	0.258688	35.2208
Fgf7	0.25831	-	-	0.25831	0.230805
Shb	0.257232	-	-	0.257232	2.66195
Tmem192	0.254384	-	-	0.254384	2.98507
Adam23	0.25349	-	-	0.25349	8.2782
Pbx3	0.253198	-	-	0.253198	20.3878
Clip2	0.252124	-	-	0.252124	6.60102
Col16a1	0.251464	-	-	0.251464	2.66195
Galnt12	0.251326	-	-	0.251326	1.58486
Malat1	0.25	-	-	0.25	100
Fem1c	0.24956	-	-	0.24956	5.84705
Zfp704	0.249382	-	-	0.249382	12.248
Tgfbi	0.24798	-	-	0.24798	2.35421
Actn4	0.247435	-	-	0.247435	9.98615
Micu2	0.246735	-	-	0.246735	7.89352
Trpc4ap	0.246435	-	-	0.246435	10.5247
Enpp1	0.246224	-	-	0.246224	2.33882
Chst3	0.245138	-	-	0.245138	1.43099
Gm16894	0.245056	-	-	0.245056	0.800123
Gm16638	0.244967	-	-	0.244967	2.13879
Fnip2	0.243937	-	-	0.243937	6.93953
Cdk5	0.243879	-	-	0.243879	6.06247
Zfp182	0.243393	-	-	0.243393	10.3247
Dync1i1	0.241537	-	-	0.241537	11.1556
Dctn4	0.241036	-	-	0.241036	14.5099
Fntb	0.241021	-	-	0.241021	6.07786
Gm26673	0.240913	-	-	0.240913	0.492383
Gareml	0.240631	-	-	0.240631	0.800123
Cdr2l	0.240536	-	-	0.240536	1.5387
Folh1	0.240469	-	-	0.240469	11.1709
Cbx4	0.24021	-	-	0.24021	1.80028
Capn5	0.239698	-	-	0.239698	1.63102
Tmem120b	0.239463	-	-	0.239463	3.12356
Prim1	0.238154	-	-	0.238154	1.63102
Faim2	0.237434	-	-	0.237434	13.2482
Gosr1	0.236819	-	-	0.236819	4.90845
Sh3bp2	0.236673	-	-	0.236673	1.26173
Tspan15	0.234674	-	-	0.234674	6.3856
Tmem184b	0.234422	-	-	0.234422	6.49331
A830010M20Rik	0.234079	-	-	0.234079	0.446222
Pld1	0.231331	-	-	0.231331	10.9401
Borcs5	0.230126	-	-	0.230126	4.73919
Gdpd1	0.22999	-	-	0.22999	6.01631
Me2	0.229746	-	-	0.229746	4.33913
Gle1	0.229335	-	-	0.229335	6.46253
Pdlim2	0.229316	-	-	0.229316	1.75412
Samd4	0.229249	-	-	0.229249	16.0486
Dock1	0.229076	-	-	0.229076	28.4198
Dubr	0.226808	-	-	0.226808	1.69257
Synpr	0.226731	-	-	0.226731	6.52408
Sirt2	0.226326	-	-	0.226326	13.6021
Glul	0.226126	-	-	0.226126	29.0506
Stxbp2	0.22402	-	-	0.22402	1.55409
Snx29	0.223942	-	-	0.223942	18.2643
Mdga2	0.22373	-	-	0.22373	69.3184
Arl2	0.221747	-	-	0.221747	6.50869
Crybg3	0.221108	-	-	0.221108	2.81582
Rusc2	0.220372	-	-	0.220372	7.93968
Tln2	0.219053	-	-	0.219053	10.3401
Slc6a6	0.218217	-	-	0.218217	12.2327
Olig1	0.217469	-	-	0.217469	4.92383
Mn1	0.217291	-	-	0.217291	0.723188
Efr3b	0.21515	-	-	0.21515	14.2945
Itga4	0.214881	-	-	0.214881	1.75412
1700042O10Rik	0.214084	-	-	0.214084	1.78489
Chn2	0.213307	-	-	0.213307	7.3242
Pik3c3	0.213123	-	-	0.213123	3.41591
2610035D17Rik	0.21293	-	-	0.21293	26.2194
Tspan5	0.212713	-	-	0.212713	26.4502
4933431E20Rik	0.2125	-	-	0.2125	3.23127
Abcb8	0.212471	-	-	0.212471	4.21603
Tmem132b	0.212013	-	-	0.212013	10.817
Micu1	0.211872	-	-	0.211872	11.4325
Pafah1b1	0.210114	-	-	0.210114	32.2203
Ilvbl	0.209244	-	-	0.209244	5.09309
Heg1	0.208693	-	-	0.208693	16.2487
Cpeb2	0.208452	-	-	0.208452	13.0174
Slc22a23	0.208078	-	-	0.208078	12.6019
Slpi	0.207076	-	-	0.207076	0.692414
Lrig2	0.206844	-	-	0.206844	12.2173
Hepacam	0.206685	-	-	0.206685	25.2193
Brdt	0.206662	-	-	0.206662	3.49285
Kcnk5	0.206576	-	-	0.206576	0.415449
Mical3	0.205667	-	-	0.205667	12.1096
Cttnbp2nl	0.205164	-	-	0.205164	5.70857
Tmc6	0.205018	-	-	0.205018	2.41576
Rap1gds1	0.204534	-	-	0.204534	13.7406
Exoc6	0.203141	-	-	0.203141	6.20095
Lrig3	0.201084	-	-	0.201084	2.90814
Thra	0.201078	-	-	0.201078	12.9712
Abcb10	0.20089	-	-	0.20089	4.38529
Meg3	0.200741	-	-	0.200741	74.473
Setd8	0.200222	-	-	0.200222	3.13894
Fdft1	0.199949	-	-	0.199949	7.87814
S100a16	0.199368	-	-	0.199368	7.66272
Magt1	0.198805	-	-	0.198805	6.2625
Lamp1	0.198393	-	-	0.198393	15.6947
Nrbp2	0.197386	-	-	0.197386	15.2177
Tbc1d16	0.197027	-	-	0.197027	4.93922
Pqlc2	0.196956	-	-	0.196956	2.26189
Lbr	0.196856	-	-	0.196856	2.58501
Kdm6a	0.196013	-	-	0.196013	11.3094
Mycbp2	0.195858	-	-	0.195858	30.2354
Zmat1	0.195716	-	-	0.195716	7.27804
Nav1	0.192773	-	-	0.192773	13.0328
Ctps	0.19187	-	-	0.19187	1.81566
Srebf2	0.191838	-	-	0.191838	11.6018
Myo6	0.191372	-	-	0.191372	24.2653
Rad51b	0.190349	-	-	0.190349	1.64641
Vgll4	0.188929	-	-	0.188929	17.2334
Lpcat2	0.18888	-	-	0.18888	5.63164
Iqsec1	0.188719	-	-	0.188719	13.9098
Map4k4	0.188069	-	-	0.188069	17.5719
Adam32	0.188043	-	-	0.188043	1.30789
Tradd	0.187743	-	-	0.187743	1.12325
Mroh3	0.187707	-	-	0.187707	0.800123
Pik3r1	0.187439	-	-	0.187439	28.5582
Ccdc88a	0.186688	-	-	0.186688	30.0662
Opcml	0.186205	-	-	0.186205	26.5272
Dnajc6	0.185653	-	-	0.185653	13.002
Ndp	0.185261	-	-	0.185261	0.338514
Hook3	0.183109	-	-	0.183109	14.3561
Llgl1	0.183062	-	-	0.183062	3.75442
Tmem126a	0.182968	-	-	0.182968	18.3567
Fto	0.182635	-	-	0.182635	22.8189
Ptpdc1	0.182337	-	-	0.182337	3.10817
Rere	0.182137	-	-	0.182137	42.1296
Spink2	0.182018	-	-	0.182018	2.09263
A330017A19Rik	0.181924	-	-	0.181924	3.44668
Scel	0.181508	-	-	0.181508	1.96953
Pam	0.181407	-	-	0.181407	23.5267
Gphn	0.180286	-	-	0.180286	49.1614
Map2k5	0.179955	-	-	0.179955	12.8174
Park2	0.179916	-	-	0.179916	36.4825
Flnb	0.179344	-	-	0.179344	11.0171
Rab10	0.179222	-	-	0.179222	18.0182
2310035C23Rik	0.179145	-	-	0.179145	14.8484
Prmt3	0.178293	-	-	0.178293	3.27743
Evi5l	0.178036	-	-	0.178036	8.97061
Cpeb3	0.176325	-	-	0.176325	29.9431
Acss2	0.175299	-	-	0.175299	7.38575
Ibtk	0.175166	-	-	0.175166	3.32359
Fam13b	0.173597	-	-	0.173597	10.1092
Agtpbp1	0.173289	-	-	0.173289	8.12433
Rhpn2	0.172952	-	-	0.172952	3.35436
Sympk	0.171664	-	-	0.171664	5.87783
Kif21b	0.17049	-	-	0.17049	5.38544
Dnm2	0.169068	-	-	0.169068	16.2333
Fn3k	0.169036	-	-	0.169036	1.86182
Ccnyl1	0.16733	-	-	0.16733	2.35421
Ncoa3	0.166536	-	-	0.166536	9.46299
Mgrn1	0.166302	-	-	0.166302	9.30912
Ubb	0.163889	-	-	0.163889	47.3919
Pim3	0.163589	-	-	0.163589	3.10817
Snhg11	0.163148	-	-	0.163148	48.0689
Ago3	0.163094	-	-	0.163094	19.1568
4931406P16Rik	0.162507	-	-	0.162507	11.9095
Kif5c	0.162079	-	-	0.162079	6.60102
Matn2	0.160743	-	-	0.160743	3.50823
Krit1	0.160721	-	-	0.160721	19.403
Pknox1	0.160598	-	-	0.160598	4.12371
Clec5a	0.159132	-	-	0.159132	0.0461609
Ppp2r5c	0.158918	-	-	0.158918	13.5098
Mapkap1	0.158571	-	-	0.158571	12.4327
Tanc2	0.157929	-	-	0.157929	26.0348
Mettl23	0.157184	-	-	0.157184	21.511
Zfp280c	0.157061	-	-	0.157061	7.97046
Efcc1	0.156824	-	-	0.156824	1.46176
Gm9881	0.156806	-	-	0.156806	0.646253
Sox2	0.156504	-	-	0.156504	6.95492
Stard5	0.156386	-	-	0.156386	4.44684
Tuba1a	0.156342	-	-	0.156342	30.1123
Ano10	0.155702	-	-	0.155702	3.60055
Rccd1	0.153515	-	-	0.153515	2.98507
Sp4	0.152694	-	-	0.152694	5.61625
Papss1	0.152501	-	-	0.152501	4.83151
Gpr137c	0.152338	-	-	0.152338	9.98615
Scarb2	0.151227	-	-	0.151227	9.5707
Pik3cb	0.151186	-	-	0.151186	4.06216
Gm20515	0.151008	-	-	0.151008	0.553931
Gpatch8	0.150556	-	-	0.150556	33.4667
Sec61a2	0.150455	-	-	0.150455	12.8174
Was	0.149612	-	-	0.149612	0.0769349
Ncapd3	0.149379	-	-	0.149379	4.52377
Cobl	0.14896	-	-	0.14896	7.43191
Sypl	0.148808	-	-	0.148808	7.04724
Tirap	0.148683	-	-	0.148683	1.13864
Aldh3b1	0.147668	-	-	0.147668	0.738575
Dennd5a	0.147375	-	-	0.147375	13.279
Reep5	0.146239	-	-	0.146239	14.7407
Thsd1	0.146103	-	-	0.146103	3.06201
Ccl12	0.146103	-	-	0.146103	0.0923219
Gm1992	0.146094	-	-	0.146094	1.90799
Git2	0.14559	-	-	0.14559	10.5555
Gm14170	0.145238	-	-	0.145238	0.015387
9330159F19Rik	0.144777	-	-	0.144777	14.4945
Elovl6	0.144156	-	-	0.144156	9.01677
Tecr	0.142963	-	-	0.142963	36.898
Phgdh	0.142802	-	-	0.142802	4.16987
Ppfia2	0.142529	-	-	0.142529	13.4636
Matn4	0.141978	-	-	0.141978	5.53931
Hspa8	0.141481	-	-	0.141481	39.006
Dennd5b	0.14118	-	-	0.14118	14.3714
Herc4	0.140927	-	-	0.140927	12.5558
RP24-78M9.6	0.140927	-	-	0.140927	0.0461609
Nlk	0.140682	-	-	0.140682	20.0185
Mob3b	0.14024	-	-	0.14024	18.6952
3110083C13Rik	0.139237	-	-	0.139237	0.66164
Mad1l1	0.138333	-	-	0.138333	39.7446
Atp2c1	0.138114	-	-	0.138114	17.495
Oxr1	0.137963	-	-	0.137963	29.7892
Atg4d	0.137751	-	-	0.137751	3.15433
Inpp5a	0.137443	-	-	0.137443	7.15495
Hr	0.137357	-	-	0.137357	1.35405
Ncoa2	0.137248	-	-	0.137248	18.7875
Scg5	0.136638	-	-	0.136638	18.8491
Snx32	0.136041	-	-	0.136041	8.95522
Stard9	0.135554	-	-	0.135554	9.30912
Lrrc8c	0.134957	-	-	0.134957	4.70842
Ncoa7	0.134939	-	-	0.134939	8.40129
Gm11730	0.134495	-	-	0.134495	0.015387
Mtmr10	0.13393	-	-	0.13393	7.4473
Hsp90aa1	0.13328	-	-	0.13328	16.3564
Slu7	0.133202	-	-	0.133202	2.7235
Ptpra	0.133101	-	-	0.133101	17.3719
Pcyt1a	0.132865	-	-	0.132865	4.50839
Glt1d1	0.132646	-	-	0.132646	1.90799
Myo9a	0.132225	-	-	0.132225	21.1417
Rasal2	0.132037	-	-	0.132037	29.2199
Pantr1	0.131748	-	-	0.131748	4.1391
Olfml2b	0.131629	-	-	0.131629	1.49254
Fam83b	0.131359	-	-	0.131359	0.523157
Nt5e	0.131284	-	-	0.131284	2.29266
Tbc1d14	0.131016	-	-	0.131016	6.49331
Appbp2	0.130625	-	-	0.130625	7.97046
Rabgap1l	0.130556	-	-	0.130556	26.2964
9430038I01Rik	0.129418	-	-	0.129418	1.55409
Rsrp1	0.129259	-	-	0.129259	35.2516
Gm26954	0.129123	-	-	0.129123	1.49254
Rab7b	0.128549	-	-	0.128549	0.276966
Gpsm2	0.126866	-	-	0.126866	2.04647
2010111I01Rik	0.126349	-	-	0.126349	21.9572
B230118H07Rik	0.126048	-	-	0.126048	8.23204
Lypd6b	0.12592	-	-	0.12592	1.29251
Abhd5	0.12568	-	-	0.12568	1.8926
Zcchc7	0.125	-	-	0.125	24.9269
Gm26559	0.124703	-	-	0.124703	0.600092
Polr1a	0.124355	-	-	0.124355	2.76966
Dpysl5	0.124351	-	-	0.124351	2.44653
Nefm	0.124086	-	-	0.124086	11.2479
Lrrc4c	0.123296	-	-	0.123296	68.7952
Lrrc4b	0.123049	-	-	0.123049	6.75489
Chst8	0.121907	-	-	0.121907	6.44715
Itm2b	0.121852	-	-	0.121852	41.8834
Adora1	0.121831	-	-	0.121831	4.06216
Ndufaf2	0.121745	-	-	0.121745	5.2008
R3hdm1	0.121456	-	-	0.121456	22.1111
Parn	0.121036	-	-	0.121036	7.18572
Lmf1	0.120292	-	-	0.120292	4.76996
Calm2	0.12	-	-	0.12	35.2516
Vbp1	0.119998	-	-	0.119998	4.15449
Abhd16a	0.119495	-	-	0.119495	8.49361
Ddc	0.119411	-	-	0.119411	4.32374
Golga7	0.119092	-	-	0.119092	4.63148
Fam198b	0.11883	-	-	0.11883	0.800123
Map7d2	0.118743	-	-	0.118743	9.49377
Emc10	0.11868	-	-	0.11868	14.2637
Snrnp48	0.117956	-	-	0.117956	12.8174
Ntan1	0.117435	-	-	0.117435	11.8172
Hsp90ab1	0.117222	-	-	0.117222	26.6195
Jakmip2	0.117065	-	-	0.117065	8.60132
Pcsk1n	0.117037	-	-	0.117037	30.5432
Nkd1	0.116822	-	-	0.116822	1.69257
Lmo7	0.116695	-	-	0.116695	2.81582
H19	0.116216	-	-	0.116216	0.015387
Pus7	0.115232	-	-	0.115232	3.63133
Gm15857	0.114919	-	-	0.114919	0.030774
Plekhb1	0.114766	-	-	0.114766	6.00092
Arhgap33	0.114509	-	-	0.114509	2.4773
Lcorl	0.113644	-	-	0.113644	13.3251
Gtdc1	0.113069	-	-	0.113069	11.7557
Atl1	0.112308	-	-	0.112308	5.06232
Tom1l2	0.111852	-	-	0.111852	24.7115
Actb	0.111667	-	-	0.111667	32.605
Atp1b1	0.111481	-	-	0.111481	24.2499
Gfod1	0.111429	-	-	0.111429	3.32359
Snap25	0.111296	-	-	0.111296	24.9269
Elovl5	0.111045	-	-	0.111045	8.61671
Aebp2	0.111009	-	-	0.111009	5.47777
Uchl1	0.110614	-	-	0.110614	18.4798
Rint1	0.110591	-	-	0.110591	5.23157
Irak3	0.110535	-	-	0.110535	0.753962
Ffar2	0.110224	-	-	0.110224	0.015387
Eri1	0.110116	-	-	0.110116	1.84644
Fam122b	0.110037	-	-	0.110037	0.584705
Edem1	0.109978	-	-	0.109978	3.46207
Wdfy3	0.109882	-	-	0.109882	14.2637
Actr1a	0.10976	-	-	0.10976	6.95492
Xaf1	0.109359	-	-	0.109359	2.3696
Hdac7	0.108351	-	-	0.108351	5.26235
Gm15232	0.108266	-	-	0.108266	0.015387
Tmem56	0.107603	-	-	0.107603	3.64671
Adcy4	0.107056	-	-	0.107056	0.0615479
Gm20388	0.107037	-	-	0.107037	50.4847
Slc11a1	0.106932	-	-	0.106932	0.984767
Nrd1	0.106767	-	-	0.106767	10.1554
Mtm1	0.106506	-	-	0.106506	5.06232
BC052040	0.106473	-	-	0.106473	7.64733
Slc20a2	0.106228	-	-	0.106228	11.1863
Pdcd6ip	0.106216	-	-	0.106216	6.30866
Aim2	0.105728	-	-	0.105728	2.7235
Tet3	0.105582	-	-	0.105582	8.90906
Acyp2	0.105458	-	-	0.105458	18.8798
Vti1b	0.105316	-	-	0.105316	12.0326
Tbc1d22a	0.10476	-	-	0.10476	6.90876
Slamf8	0.104637	-	-	0.104637	0.015387
Srsf2	0.10463	-	-	0.10463	20.1108
Git1	0.104299	-	-	0.104299	2.58501
Gm29291	0.104234	-	-	0.104234	0.015387
C79798	0.104181	-	-	0.104181	2.64656
Magi1	0.103704	-	-	0.103704	31.0817
Rasgef1b	0.103268	-	-	0.103268	0.846284
Gm10295	0.103226	-	-	0.103226	0.015387
Arpc1a	0.103074	-	-	0.103074	10.217
Mthfd1l	0.103071	-	-	0.103071	4.61609
Cap1	0.10252	-	-	0.10252	4.16987
B3galt1	0.10248	-	-	0.10248	41.3294
Cog5	0.102222	-	-	0.102222	22.2034
Arid5b	0.102186	-	-	0.102186	11.1709
Gm16192	0.101672	-	-	0.101672	0.246192
Stmn3	0.101296	-	-	0.101296	20.4647
P2rx4	0.100702	-	-	0.100702	5.98554
Gm43153	0.100403	-	-	0.100403	0.0461609
Errfi1	0.09986	-	-	0.09986	3.95445
Gm42817	0.0995968	-	-	0.0995968	0.030774
Prcp	0.0991552	-	-	0.0991552	3.64671
Fech	0.0990678	-	-	0.0990678	3.60055
Tle1	0.0989487	-	-	0.0989487	5.10848
Nefl	0.0988889	-	-	0.0988889	23.5729
Dennd1a	0.0985185	-	-	0.0985185	28.2659
Snx24	0.0981451	-	-	0.0981451	9.40145
Abtb2	0.0978049	-	-	0.0978049	14.2176
Piezo2	0.0974916	-	-	0.0974916	2.2465
Morf4l1	0.0972396	-	-	0.0972396	11.0786
Tpd52	0.0971504	-	-	0.0971504	6.93953
Sorcs3	0.0970612	-	-	0.0970612	11.8788
Synpo	0.0966555	-	-	0.0966555	0.938606
Wdfy2	0.0965558	-	-	0.0965558	9.35529
Sptbn1	0.0964815	-	-	0.0964815	24.3268
9630041A04Rik	0.0961694	-	-	0.0961694	0.015387
Rab40b	0.0960727	-	-	0.0960727	1.30789
C230037L18Rik	0.0959475	-	-	0.0959475	2.90814
Dpp6	0.0959259	-	-	0.0959259	24.9423
Gm12827	0.0955645	-	-	0.0955645	0.015387
Usp22	0.0953294	-	-	0.0953294	5.98554
Pkm	0.0951852	-	-	0.0951852	25.3424
Gm26832	0.0951613	-	-	0.0951613	0.015387
Nsmce2	0.0951592	-	-	0.0951592	15.1562
Pacsin3	0.0950076	-	-	0.0950076	2.86198
Sltm	0.095	-	-	0.095	23.5575
Gas2	0.0945954	-	-	0.0945954	3.03124
Acer2	0.0945578	-	-	0.0945578	1.83105
0610007P14Rik	0.094547	-	-	0.094547	5.93938
Simc1	0.0944926	-	-	0.0944926	5.86244
Olfr558	0.0943548	-	-	0.0943548	0.015387
Tspo2	0.0941532	-	-	0.0941532	0.030774
Ralgds	0.0940865	-	-	0.0940865	5.0777
Nap1l5	0.092963	-	-	0.092963	21.6341
Pafah1b2	0.092813	-	-	0.092813	7.90891
Clock	0.0927895	-	-	0.0927895	10.9248
Gpr176	0.0927533	-	-	0.0927533	3.03124
Tcf23	0.0927419	-	-	0.0927419	0.015387
Crk	0.0926737	-	-	0.0926737	8.78597
Ccnt2	0.092037	-	-	0.092037	20.7878
Foxs1	0.0915323	-	-	0.0915323	0.0769349
Rubcn	0.0909709	-	-	0.0909709	4.50839
BC021891	0.0909274	-	-	0.0909274	0.0769349
Efna1	0.0909052	-	-	0.0909052	0.646253
Trpc1	0.0908279	-	-	0.0908279	6.50869
Resp18	0.0905556	-	-	0.0905556	23.419
Slc25a4	0.0903704	-	-	0.0903704	23.0497
Gm5087	0.0899038	-	-	0.0899038	1.13864
Gal	0.0896296	-	-	0.0896296	25.9732
Card14	0.0889113	-	-	0.0889113	0.0461609
AU040320	0.0888994	-	-	0.0888994	9.75535
Ubc	0.0888889	-	-	0.0888889	21.0648
Plekhm3	0.0886895	-	-	0.0886895	8.67826
Rhobtb3	0.0885626	-	-	0.0885626	5.30851
Gm9978	0.0885081	-	-	0.0885081	0.015387
Itgb3	0.0884615	-	-	0.0884615	0.569318
Xlr5a	0.0883235	-	-	0.0883235	17.4181
Psen1	0.088238	-	-	0.088238	5.50854
Gnas	0.0881481	-	-	0.0881481	32.682
Ccser2	0.0878525	-	-	0.0878525	8.8629
Gkap1	0.0878403	-	-	0.0878403	13.1251
Akr1b3	0.0877607	-	-	0.0877607	3.38514
Gm14062	0.0868952	-	-	0.0868952	0.015387
Ube2z	0.0864538	-	-	0.0864538	3.33898
Bnip3l	0.0863112	-	-	0.0863112	7.61656
Cyp2f2	0.0860887	-	-	0.0860887	0.015387
Kcnrg	0.0858646	-	-	0.0858646	8.77058
Xrcc6	0.0849204	-	-	0.0849204	4.12371
Gm26904	0.0846149	-	-	0.0846149	19.0337
Kcnj2	0.0844482	-	-	0.0844482	0.461609
Abcc5	0.0841682	-	-	0.0841682	14.5869
Tshr	0.0841406	-	-	0.0841406	0.861671
Wwp1	0.0839913	-	-	0.0839913	9.30912
Klc1	0.0838889	-	-	0.0838889	17.3719
Wscd2	0.0838343	-	-	0.0838343	1.46176
Map2k2	0.0836745	-	-	0.0836745	9.01677
Plekha5	0.0835185	-	-	0.0835185	15.4485
Usp15	0.083263	-	-	0.083263	7.46269
Map1b	0.0831481	-	-	0.0831481	24.9885
Map7d1	0.083046	-	-	0.083046	6.13941
Zyx	0.0828552	-	-	0.0828552	1.58486
Nkx6-2	0.0826687	-	-	0.0826687	3.00046
Aoc1	0.0824597	-	-	0.0824597	0.0461609
Sppl2b	0.0823255	-	-	0.0823255	4.67764
Tecrl	0.0818548	-	-	0.0818548	0.0461609
Slc12a8	0.0811759	-	-	0.0811759	0.584705
Fbxw17	0.0806471	-	-	0.0806471	2.09263
Gm10069	0.0803677	-	-	0.0803677	4.15449
Klf7	0.0803436	-	-	0.0803436	17.4642
Kif5b	0.0794444	-	-	0.0794444	20.5724
Fam46a	0.0794314	-	-	0.0794314	1.01554
Gm15821	0.0792339	-	-	0.0792339	0.015387
Zfyve26	0.0791969	-	-	0.0791969	5.30851
Cntnap2	0.0790741	-	-	0.0790741	29.7738
Lcp1	0.0789001	-	-	0.0789001	1.84644
Kcnu1	0.0785385	-	-	0.0785385	2.52347
Lypd6	0.0784281	-	-	0.0784281	2.29266
1700024G13Rik	0.0784274	-	-	0.0784274	0.0461609
RP23-455C13.7	0.0779264	-	-	0.0779264	1.1848
Matn1	0.0774194	-	-	0.0774194	0.030774
Itfg1	0.0774074	-	-	0.0774074	16.1563
Duxbl1	0.07729	-	-	0.07729	0.753962
Gltscr1l	0.0770862	-	-	0.0770862	5.98554
Nudt7	0.0770202	-	-	0.0770202	2.27727
Glipr1l1	0.0768145	-	-	0.0768145	0.030774
U2af1	0.0767311	-	-	0.0767311	8.30897
Fam49b	0.0761111	-	-	0.0761111	16.9718
Penk	0.0759142	-	-	0.0759142	9.78612
Mdh1	0.0757407	-	-	0.0757407	21.234
Atp6v0b	0.0755556	-	-	0.0755556	24.4191
Gm12162	0.0754032	-	-	0.0754032	0.015387
Ccr6	0.0752016	-	-	0.0752016	0.015387
Cadm1	0.0751852	-	-	0.0751852	29.0814
Mest	0.0750836	-	-	0.0750836	1.16941
Traf5	0.074865	-	-	0.074865	10.6632
Aldoa	0.0748148	-	-	0.0748148	24.373
Lyg2	0.0735887	-	-	0.0735887	0.0615479
Tmem260	0.073298	-	-	0.073298	9.17064
Obfc1	0.0732441	-	-	0.0732441	2.21573
Cartpt	0.0731624	-	-	0.0731624	10.9401
Lingo2	0.072963	-	-	0.072963	21.7726
Mbnl1	0.0727778	-	-	0.0727778	15.6024
Pbrm1	0.0725926	-	-	0.0725926	16.6795
Zbtb2	0.0721082	-	-	0.0721082	1.60025
Scg2	0.072037	-	-	0.072037	16.5872
Tmed10	0.0719938	-	-	0.0719938	12.802
A630077J23Rik	0.0719758	-	-	0.0719758	0.015387
Kif1a	0.0711754	-	-	0.0711754	13.956
Nek2	0.0711694	-	-	0.0711694	0.015387
Stambp	0.0710282	-	-	0.0710282	3.15433
Soga3	0.0709793	-	-	0.0709793	10.2477
Sptlc2	0.0708318	-	-	0.0708318	6.23173
Gm13814	0.0707661	-	-	0.0707661	0.015387
Mucl2	0.0705645	-	-	0.0705645	0.015387
Cdh6	0.0701737	-	-	0.0701737	4.8469
Msmo1	0.0700392	-	-	0.0700392	11.1556
PISD	0.0694444	-	-	0.0694444	25.8809
Gatad2b	0.0692593	-	-	0.0692593	13.9406
Gm28380	0.0691532	-	-	0.0691532	0.015387
Saa1	0.0689516	-	-	0.0689516	0.030774
Bcl7a	0.0687284	-	-	0.0687284	3.27743
Arhgap15	0.0685619	-	-	0.0685619	3.35436
RP24-492L15.6	0.0685484	-	-	0.0685484	0.015387
Usp25	0.0683854	-	-	0.0683854	7.55501
Eefsec	0.0683742	-	-	0.0683742	8.032
Chd7	0.0683333	-	-	0.0683333	14.7407
Sgk1	0.0682962	-	-	0.0682962	4.41606
Ndn	0.0682838	-	-	0.0682838	12.1711
Rif1	0.0682489	-	-	0.0682489	6.3856
Kif16b	0.0681698	-	-	0.0681698	7.41653
Dync1i2	0.0679976	-	-	0.0679976	12.0942
Zfp579	0.0671923	-	-	0.0671923	3.00046
Slc15a4	0.0671578	-	-	0.0671578	1.44638
Rnaseh1	0.0670432	-	-	0.0670432	1.83105
Gm16152	0.0668896	-	-	0.0668896	0.430836
Sel1l	0.0667252	-	-	0.0667252	8.24742
Itgav	0.0666667	-	-	0.0666667	15.5716
Tmem5	0.0666592	-	-	0.0666592	3.87752
Chp1	0.0665868	-	-	0.0665868	8.29358
Gsx1	0.0665323	-	-	0.0665323	0.015387
Gpatch2l	0.0662943	-	-	0.0662943	5.17003
Agmo	0.0662783	-	-	0.0662783	13.3867
Rbpjl	0.0659274	-	-	0.0659274	0.107709
Arih1	0.0657407	-	-	0.0657407	19.0029
Dnm3os	0.0655518	-	-	0.0655518	0.230805
Prdx1	0.0653704	-	-	0.0653704	16.7564
Sorbs3	0.0644927	-	-	0.0644927	2.92353
Rgs3	0.0644585	-	-	0.0644585	4.35452
Snx8	0.0640468	-	-	0.0640468	3.03124
Ccser1	0.0638889	-	-	0.0638889	24.6653
Lgmn	0.0636665	-	-	0.0636665	12.1557
Rell1	0.0633779	-	-	0.0633779	3.61594
Sncg	0.0633333	-	-	0.0633333	16.4795
Col9a1	0.0628054	-	-	0.0628054	0.81551
Pcnt	0.0627085	-	-	0.0627085	2.96969
Cd33	0.0627016	-	-	0.0627016	0.0769349
Bex2	0.0625926	-	-	0.0625926	15.8332
Tuba1b	0.0624074	-	-	0.0624074	17.9566
Vil1	0.0618952	-	-	0.0618952	0.0461609
Sncb	0.0610767	-	-	0.0610767	8.52439
Tango2	0.061004	-	-	0.061004	8.46284
St8sia5	0.0606143	-	-	0.0606143	1.67718
Tmem108	0.0603704	-	-	0.0603704	13.3405
Grik1	0.0602795	-	-	0.0602795	3.04662
Prr14l	0.0600836	-	-	0.0600836	8.21665
Ephb2	0.0597297	-	-	0.0597297	3.03124
Ttll6	0.0592742	-	-	0.0592742	2.4773
Nuak1	0.0588629	-	-	0.0588629	3.32359
Apc	0.0588533	-	-	0.0588533	21.7572
Serpina3g	0.0586957	-	-	0.0586957	0.0461609
Gm44109	0.0586694	-	-	0.0586694	0.015387
Lonrf1	0.0583612	-	-	0.0583612	1.27712
Slc25a45	0.058194	-	-	0.058194	0.492383
Rbks	0.0578135	-	-	0.0578135	5.58547
Rps6kl1	0.057741	-	-	0.057741	1.81566
Crtac1	0.0570234	-	-	0.0570234	2.38498
Slk	0.0565961	-	-	0.0565961	5.27774
Fendrr	0.0564516	-	-	0.0564516	0.015387
Fam63a	0.0561988	-	-	0.0561988	3.38514
Msrb1	0.0560831	-	-	0.0560831	1.93876
Zzz3	0.056025	-	-	0.056025	6.41637
Cadps	0.0559259	-	-	0.0559259	20.4031
Sema5a	0.0556516	-	-	0.0556516	7.41653
Six1	0.0556452	-	-	0.0556452	0.015387
Gm26561	0.055602	-	-	0.055602	7.33959
Alx4	0.0554435	-	-	0.0554435	0.015387
Ppp3ca	0.0551852	-	-	0.0551852	34.1591
Msh3	0.0549361	-	-	0.0549361	4.97
Mon2	0.0548514	-	-	0.0548514	8.06278
Rnf152	0.0546823	-	-	0.0546823	2.8312
Lancl1	0.0546748	-	-	0.0546748	6.2625
Eef1a1	0.0546296	-	-	0.0546296	16.2025
AI661453	0.0542339	-	-	0.0542339	0.015387
Sh3glb1	0.0540549	-	-	0.0540549	10.1092
Fut8	0.0538889	-	-	0.0538889	16.6026
Wdr76	0.0534103	-	-	0.0534103	3.7852
Rfc2	0.0533936	-	-	0.0533936	6.3856
Traf1	0.0530242	-	-	0.0530242	1.20018
Lipe	0.0529977	-	-	0.0529977	5.78551
Stmn2	0.052963	-	-	0.052963	14.2483
Ctnnbip1	0.0528428	-	-	0.0528428	3.93907
Gm27010	0.0526756	-	-	0.0526756	0.615479
Lurap1	0.0526219	-	-	0.0526219	3.15433
Vrk1	0.052536	-	-	0.052536	2.40037
Paip2	0.052037	-	-	0.052037	12.048
Bhmt2	0.0512097	-	-	0.0512097	0.0769349
Gpr84	0.0510081	-	-	0.0510081	0.015387
Srrm2	0.0509259	-	-	0.0509259	25.5732
Plk3	0.0503344	-	-	0.0503344	0.861671
Slc9a9	0.0498148	-	-	0.0498148	14.1253
Cysltr2	0.0497984	-	-	0.0497984	0.015387
Bre	0.0492593	-	-	0.0492593	13.7098
Hspb2	0.0491935	-	-	0.0491935	0.0461609
Ube2g1	0.0488889	-	-	0.0488889	10.9555
Apbb1ip	0.0481605	-	-	0.0481605	2.81582
Trip11	0.0481481	-	-	0.0481481	11.5556
Dot1l	0.0480761	-	-	0.0480761	6.13941
Col6a3	0.0479933	-	-	0.0479933	0.446222
Btbd9	0.0477778	-	-	0.0477778	19.2337
Clec10a	0.0476589	-	-	0.0476589	0.0461609
Myo1g	0.047379	-	-	0.047379	0.0461609
Cmip	0.0472222	-	-	0.0472222	13.5252
Amer2	0.0470827	-	-	0.0470827	1.75412
Caly	0.047037	-	-	0.047037	11.6018
Ubr2	0.0467216	-	-	0.0467216	9.13987
Ypel3	0.0466667	-	-	0.0466667	13.1866
Rnpep	0.0465143	-	-	0.0465143	5.87783
Ripply3	0.0461694	-	-	0.0461694	0.015387
Phactr3	0.0461595	-	-	0.0461595	11.4171
Eml6	0.0461111	-	-	0.0461111	17.3411
Cd48	0.0459677	-	-	0.0459677	0.0923219
Ap3b1	0.0459259	-	-	0.0459259	12.4788
Uox	0.0457661	-	-	0.0457661	0.107709
Hip1	0.0457407	-	-	0.0457407	19.4491
Gfra1	0.0453177	-	-	0.0453177	3.87752
Npepps	0.0440741	-	-	0.0440741	18.1874
Ctsb	0.0438889	-	-	0.0438889	16.0332
Gamt	0.0438127	-	-	0.0438127	1.00015
Nktr	0.0435185	-	-	0.0435185	16.3717
Nsmf	0.0432053	-	-	0.0432053	7.07801
Med27	0.0431502	-	-	0.0431502	4.98538
Shc4	0.0429435	-	-	0.0429435	1.5387
Gm27247	0.0425403	-	-	0.0425403	2.33882
Defb30	0.0423387	-	-	0.0423387	0.015387
Auts2	0.0422222	-	-	0.0422222	43.1143
Fkbp1a	0.042037	-	-	0.042037	9.80151
Ccdc13	0.0419971	-	-	0.0419971	1.81566
Nucb2	0.041806	-	-	0.041806	1.87721
Mrgprf	0.0417339	-	-	0.0417339	0.015387
[truncated: 236 more rows]

## Sheet: OPCs
gene	combined_expr_specificity	cellex_score_zhang	expr_proportion_zhang	cellex_score_ludwig	expr_proportion_ludwig
[truncated: 2,460 more rows]

[truncated: 29 more sheets: Tanycyte-like_cells, VLMCs, Chat1, Chat2, Chat3, GABA1, GABA2, GABA3, GABA4, GABA5, GABA6, GABA7, Glu1, Glu2, Glu3, Glu4a, Glu4b, Glu4c, Glu5, Glu6 …]
